# Supplementary material for: Late-stage and strain-accelerated oxidation enabled synthesis of haouamine A
Source: Royal Society of Chemistry journal article supplement (doi:10.1039/d0sc02299c), 2020-01-01

## Supporting Information Available

- I) Experimental Procedures and Physical Data for Compounds
- II) Abbreviations
- III) References
- IV)  $^1\text{H}$  and  $^{13}\text{C}$  NMR Spectra for Compounds

### I) Experimental Procedures and Physical Data for Compounds

**General Procedures.** Reactions were carried out under an argon atmosphere with dry solvents under anhydrous conditions, unless otherwise noted. Dry tetrahydrofuran (THF), methylene chloride ( $\text{CH}_2\text{Cl}_2$ ), and toluene were dried and distilled according to the standard protocols. Methanol (MeOH), *N,N'*-dimethylformamide (DMF), dimethylsulfoxide (DMSO), acetonitrile ( $\text{CH}_3\text{CN}$ ), and acetone were purchased in anhydrous form and used without further purification. Ethyl acetate (EtOAc),  $\text{Et}_2\text{O}$ ,  $\text{CH}_2\text{Cl}_2$ , hexanes and water ( $\text{H}_2\text{O}$ ) were purchased at the highest commercial quality and used without further purification, unless otherwise stated. Reagents were purchased at the highest commercial quality and used without further purification, unless otherwise stated. Yields refer to chromatographically and spectroscopically ( $^1\text{H}$  NMR) homogeneous materials, unless otherwise stated. Reactions were monitored by thin-layers chromatography (TLC) carried out on 0.25 mm E. Merck silica gel plates (60 F<sub>254</sub>) using UV light as visualizing agent and an ethanolic solution of ammonium molybdate or potassium permanganate, and heat as developing agents. E. Merck silica gel (60, particle size 0.040–0.063 mm) was used for flash column chromatography. NMR spectra were recorded on an Agilent 400-MR DD2 or Agilent vrms-500 Magnetic Resonance System

and calibrated using residue undeuterated solvent as internal reference. The following abbreviations were used to explain the multiplicities: s = singlet, d = doublet, t = triplet, q = quartet, m = multiplet, br = broad. IR spectra were recorded on an IRTracer-100 spectrometer and Bruker TENSOR27 spectrometer. High-resolution mass spectra (HRMS) were recorded on a Bruker (compact) Ultra High Resolution ESI Q-TOF mass spectrometer. Optical rotation ( $[\alpha]$ ) was recorded on a Jasco P-1030 polarimeter.

#### Tertiary Alcohol 4

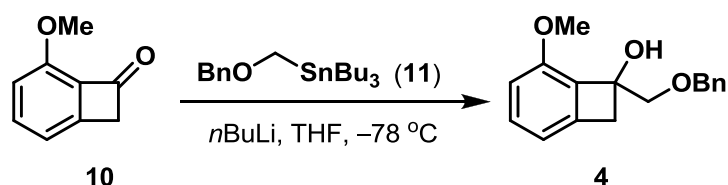

To a stirred solution of (benzyloxymethyl)tri-*n*-butylstannane<sup>[1]</sup> (**11**, 6.42 g, 15.60 mmol) in THF (45.0 mL) at  $-78\text{ }^{\circ}\text{C}$  was added *n*-butyllithium (2.5 M in hexanes, 6.24 mL, 15.60 mmol). The resulting mixture was stirred for 30 min before a solution of ketone **10**<sup>[2]</sup> (2.20 g, 14.86 mmol) in THF (22.0 mL) was added. The resulting mixture was stirred for 20 min before it was quenched with  $\text{NH}_4\text{Cl}$  (30 mL, sat. aq.), extracted with EtOAc ( $3 \times 30\text{ mL}$ ), combined organic layer washed with brine (50 mL), dried over anhydrous  $\text{Na}_2\text{SO}_4$  and concentrated under reduced pressure. The resulting residue was purified by flash column chromatography (silica gel, hexanes:EtOAc 9:1) to afford tertiary alcohol **4** (3.62 g, 90%) as a yellow oil. **4**:  $R_f$  = 0.21 (silica gel, hexanes:EtOAc 9:1); IR (film)  $\nu_{\text{max}}$  3427, 2928, 2864, 1707, 1608, 1478, 1259, 1071, 772, 735, 697  $\text{cm}^{-1}$ ;  $^1\text{H}$  NMR (400 MHz,  $\text{CDCl}_3$ ):  $\delta$  7.27 (d,  $J$  = 4.4 Hz, 4H), 7.25–7.18 (m, 1H), 7.18–7.11 (dd, 1H), 6.66 (d,  $J$  = 7.1 Hz, 1H), 6.62 (d,  $J$  = 8.5 Hz, 1H), 4.60 (d,  $J$  = 12.0 Hz, 1H), 4.51 (d,  $J$  = 12.1 Hz, 1H), 3.80 (d,  $J$  = 9.5, 1.2 Hz, 1H), 3.78 (s, 3H), 3.58 (d,  $J$  = 9.4 Hz, 1H), 3.27 (d,  $J$  = 14.0 Hz, 1H), 3.19–3.15 (m, 1H), 3.08 ppm (dd,  $J$  = 14.0, 1.2 Hz, 1H);  $^{13}\text{C}$  NMR (100 MHz,  $\text{CDCl}_3$ ):  $\delta$  154.5, 143.9, 138.1, 131.4, 131.1, 128.6, 127.9, 127.9, 116.2, 112.5, 78.6, 75.7, 73.7, 56.7, 44.4 ppm; HRMS calcd. For  $\text{C}_{17}\text{H}_{18}\text{O}_3\text{Na}^+$  [ $\text{M} + \text{Na}$ ] $^+$  293.1154, found 293.1151.

## Tertiary Alcohol 6

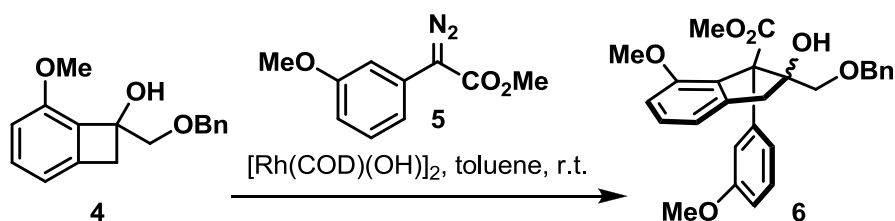

To a stirred solution of tertiary alcohol **4** (4.31 g, 15.9 mmol) and diazoester **5**<sup>[3]</sup> (3.45 g, 16.76 mmol) in toluene (25.0 mL) at 0 °C was added [Rh(COD)(OH)]<sub>2</sub> (61.0 mg, 0.13 mmol). The resulting mixture was stirred for 10 min then warmed to room temperature and stirred for 3 h before it was concentrated under reduced pressure. The resulting residue was purified by flash column chromatography (silica gel, hexanes:EtOAc 4:1) to afford tertiary alcohol **6** (ca. 3:1 mixture of diastereoisomers, 5.5 g, 77%) as a yellow foam. **6**: *R<sub>f</sub>* = 0.34 (silica gel, hexanes:EtOAc 7:3); IR (film)  $\nu_{\text{max}}$  3544, 2951, 2836, 1735, 1590, 1480, 1266, 1218, 1082, 735, 697 cm<sup>-1</sup>; <sup>1</sup>H NMR (400 MHz, CDCl<sub>3</sub>, ca. 3:1 mixture of diastereoisomers):  $\delta$  7.37–7.27 (m, 5H), 7.17 (t, *J* = 8.1 Hz, 0.7H), 7.12 (t, *J* = 8.0 Hz, 0.3H), 6.98 (t, *J* = 2.2 Hz, 0.7H), 6.92 (d, *J* = 7.5 Hz, 0.3H), 6.90–6.85 (m, 2H), 6.84–6.75 (m, 3H), 4.64–4.57 (m, 1H), 4.51 (d, *J* = 12.2 Hz, 0.7H), 4.40 (d, *J* = 11.9 Hz, 0.3H), 3.89 (d, *J* = 9.4 Hz, 0.7H), 3.73–3.71 (m, 2H), 3.70 (s, 2H), 3.68 (s, 2H), 3.66 (s, 2H), 3.57 (s, 2H), 3.30 (d, *J* = 9.6 Hz, 0.3H), 3.19 (d, *J* = 16.4 Hz, 1H), 3.12 (d, *J* = 16.0 Hz, 0.3H), 3.06 (d, *J* = 15.8 Hz, 0.3H), 2.95 (d, *J* = 16.1 Hz, 0.7H), 2.41 ppm (s, 0.7H); <sup>13</sup>C NMR (100 MHz, CDCl<sub>3</sub>, ca. 3:1 mixture of diastereoisomers):  $\delta$  174.1, 172.4, 159.0, 158.6, 157.0, 156.7, 143.8, 142.8, 138.3, 137.8, 137.2, 130.6, 130.0, 129.9, 128.5, 128.3, 127.8, 127.8, 127.5, 127.3, 123.0, 121.4, 117.8, 117.3, 116.9, 115.3, 112.5, 112.3, 110.1, 109.5, 86.6, 85.1, 74.5, 73.9, 73.6, 73.3, 68.0, 67.6, 55.5, 55.3, 55.1, 52.5, 52.1, 43.3, 42.8 ppm; HRMS calcd. For C<sub>27</sub>H<sub>28</sub>O<sub>6</sub>Na<sup>+</sup> [*M* + Na]<sup>+</sup> 471.1778, found 471.1778.

## Keto Ester 13

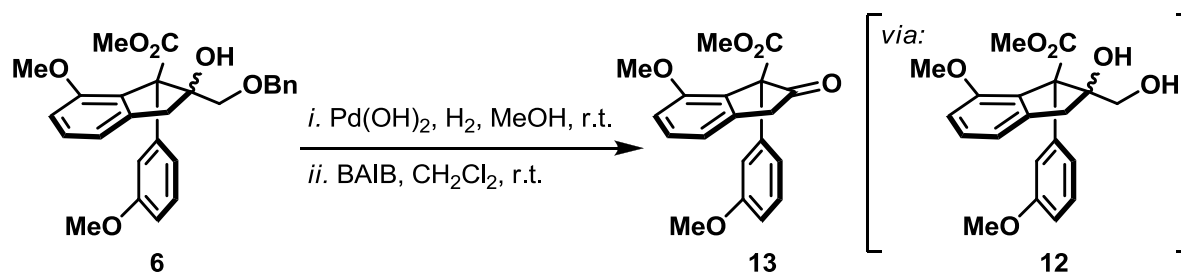

(i) To a stirred solution of benzyl ether **6** (5.5 g, 12.3 mmol) in MeOH (50.0 mL) at room temperature was added Pd(OH)<sub>2</sub> on carbon (5 wt% on carbon, 18% wt/wt, 1.0 g). The resulting mixture was purged with hydrogen gas (balloon bubbling) for 10 min then stirred under an atmosphere of hydrogen (balloon) for 15 h. The resulting mixture was filtered through a pad of Celite<sup>®</sup> and eluted with MeOH (50 mL), and concentrated under reduced pressure to afford crude diol **12** which was used directly in the subsequent reaction.

### Representative <sup>1</sup>H NMR (400 MHz, CDCl<sub>3</sub>, crude) of diol **12**

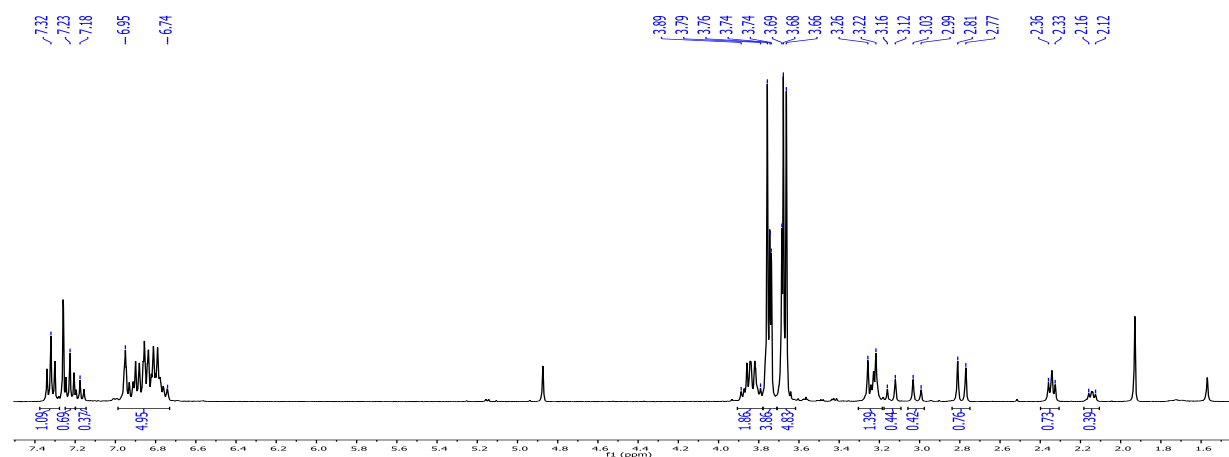

(ii) To a stirred solution of diol **12** (obtained above) in CH<sub>2</sub>Cl<sub>2</sub> (40.0 mL) at room temperature was added BAIB (3.96 g, 12.3 mmol). The resulting mixture was stirred for 3.5 h before it was transferred to a separatory funnel and washed with pH7 phosphate buffer (50 mL). The organic layer was separated, dried over anhydrous Na<sub>2</sub>SO<sub>4</sub> and concentrated under reduced pressure. The resulting residue was purified by flash column chromatography (silica gel, hexanes:EtOAc 8:2→6:4) to afford keto ester **13** (3.8 g, 94% over two steps) as a colorless oil. **13**: *R<sub>f</sub>* = 0.70 (silica gel, hexanes:EtOAc 1:1); IR (film)  $\nu_{\text{max}}$  2931, 1741, 1261, 1121, 1045, 786, 690 cm<sup>-1</sup>; <sup>1</sup>H NMR (400 MHz, CDCl<sub>3</sub>):  $\delta$  7.40 (t, *J* = 7.9 Hz, 1H), 7.20 (t, *J* = 8.0 Hz, 1H), 7.01 (dd, *J* = 7.6, 1.0 Hz, 1H), 6.92 (d, *J* = 8.3 Hz, 1H), 6.89 (t, *J* = 2.2 Hz, 1H), 6.87–6.80 (m, 2H), 3.78 (s, 3H), 3.76 (s, 3H), 3.69 (s, 3H), 3.61 ppm (s, 2H); <sup>13</sup>C NMR (100 MHz, CDCl<sub>3</sub>):  $\delta$  207.6, 169.7, 159.4, 156.7, 138.4, 135.5, 130.4, 129.0, 128.6, 121.0, 117.4, 114.9, 113.4, 109.9, 69.0, 55.7, 55.3, 53.0, 42.5 ppm; HRMS calcd. For C<sub>19</sub>H<sub>18</sub>O<sub>5</sub>Na<sup>+</sup> [*M* + Na]<sup>+</sup> 349.1052, found 349.1049.



## Indene Methyl Ester 14

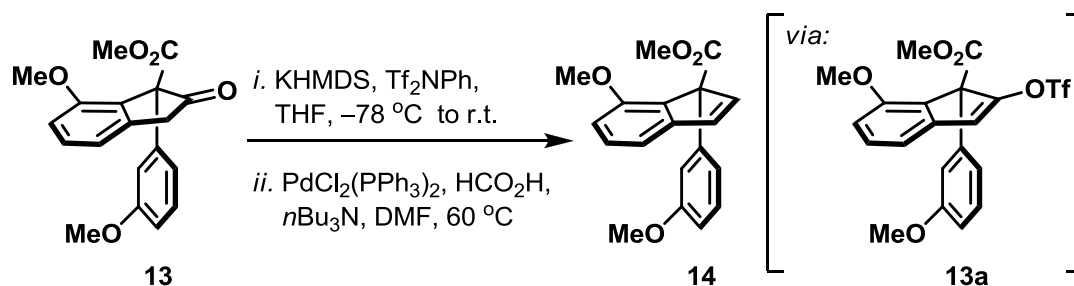

(i) To a stirred solution of ketone **13** (3.8 g, 11.6 mmol) in THF (100.0 mL) at -78 °C was added KHMDS (0.7 M in toluene, 18.2 mL, 12.8 mmol). The resulting mixture was stirred for 30 min before a solution of Tf<sub>2</sub>NPh (5.4 g, 15.1 mmol) in THF (30.0 mL) was added. The resulting mixture was stirred for 15 min then warmed to room temperature and stirred for 2 h before it was quenched with NH<sub>4</sub>Cl (200 mL, sat. aq.), extracted with EtOAc (3 × 50 mL), combined organic layer washed with brine (50 mL), dried over anhydrous Na<sub>2</sub>SO<sub>4</sub> and concentrated under reduced pressure. The resulting residue was purified by flash column chromatography (silica gel, hexanes:EtOAc 9.5:1) to afford triflate **13a** (5.3 g, 99%) as a yellow oil. **13a**: *R<sub>f</sub>* = 0.30 (silica gel, hexanes:EtOAc 8:2); IR (film)  $\nu_{\text{max}}$  2955, 2844, 1426, 1209, 1137, 827, 734, 603 cm<sup>-1</sup>; <sup>1</sup>H NMR (400 MHz, CDCl<sub>3</sub>):  $\delta$  7.37 (ddd, *J* = 8.4, 7.4, 0.6 Hz, 1H), 7.22 (t, 1H), 7.02 (dd, *J* = 7.5, 0.8 Hz, 1H), 6.89–6.79 (m, 4H), 6.66 (s, 1H), 3.76 (s, 3H), 3.74 ppm (s, 6H); <sup>13</sup>C NMR (100 MHz, CDCl<sub>3</sub>):  $\delta$  168.5, 159.5, 155.4, 154.6, 140.9, 134.4, 130.8, 129.7, 129.3, 127.4, 127.1, 123.4, 120.3, 120.1, 118.5 (q, *J*<sub>C-F</sub> = 320.8 Hz), 117.5, 116.9, 115.8, 114.3, 113.5, 111.1, 66.5, 55.7, 55.3, 53.2 ppm; HRMS calcd. For C<sub>20</sub>H<sub>17</sub>F<sub>3</sub>O<sub>7</sub>SN<sup>+</sup> [M + Na]<sup>+</sup> 481.0545, found 481.0541.

(ii) To a stirred solution of triflate **13a** (obtained above) in DMF (23.0 mL) at room temperature was added PdCl<sub>2</sub>(PPh<sub>3</sub>)<sub>2</sub> (0.41 g, 0.58 mmol) and *n*Bu<sub>3</sub>N (8.78 mL, 34.8 mmol). The resulting mixture was purged with argon (balloon bubbling) for 5 min before HCO<sub>2</sub>H (0.91 mL, 23.2 mmol) was added. The resulting mixture was placed into a pre-heated (60 °C) oil bath and stirred for 1.5 h before it was cooled to room temperature, diluted with HCl (1 N aq., 150 mL), extracted with EtOAc (3 × 50 mL), combined organic layer washed with brine (50 mL), dried over anhydrous Na<sub>2</sub>SO<sub>4</sub> and concentrated under reduced pressure. The resulting residue was purified by flash column chromatography (silica gel, hexanes:EtOAc 9:1) to afford indene methyl ester **14** (3.5 g, 96%) as a colorless oil. **14**: *R<sub>f</sub>* = 0.65 (silica gel,

hexanes:EtOAc 7:3); IR (film)  $\nu_{\max}$  2948, 2835, 1733, 1475, 1265, 1017, 811, 722, 693  $\text{cm}^{-1}$ ;  $^1\text{H}$  NMR (400 MHz,  $\text{CDCl}_3$ ):  $\delta$  7.31 (t, 1H), 7.19 (t, 1H), 7.99 (d, 1H), 6.97–6.89 (m, 2H), 6.85 (dd,  $J = 5.4, 1.3$  Hz, 1H), 6.79 (d,  $J = 8.3$  Hz, 2H), 6.58 (d,  $J = 5.4$  Hz, 1H), 3.76 (d,  $J = 1.4$  Hz, 6H), 3.71 ppm (s, 3H);  $^{13}\text{C}$  NMR (100 MHz,  $\text{CDCl}_3$ ):  $\delta$  171.7, 159.3, 156.0, 145.4, 140.2, 138.1, 133.0, 132.4, 130.1, 128.9, 120.5, 115.0, 114.2, 112.4, 110.2, 68.4, 55.7, 55.3, 52.7 ppm; HRMS calcd. For  $\text{C}_{19}\text{H}_{18}\text{O}_4\text{Na}^+ [\text{M} + \text{Na}]^+$  333.1103, found 333.1096.

## Sulfamate 16

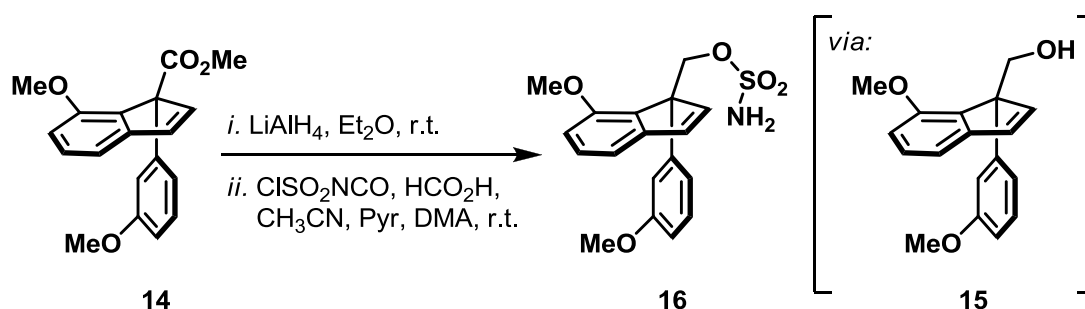

(i) To a stirred suspension of  $\text{LiAlH}_4$  (0.45 g, 12.2 mmol) in  $\text{Et}_2\text{O}$  (40.0 mL) at 0 °C was added a solution of methyl ester **14** (3.5 g, 11.1 mmol) in  $\text{Et}_2\text{O}$  (40.0 mL). The resulting mixture was stirred for 5 min then warmed to room temperature and stirred for 1.5 h before it was cooled to 0 °C and quenched sequentially with  $\text{H}_2\text{O}$  (5.5 mL),  $\text{NaOH}$  (15% aq., 5.5 mL) and  $\text{H}_2\text{O}$  (6 mL). The resulting mixture was warmed to room temperature and stirred for 5 min before it was filtered through a pad of Celite<sup>®</sup>, eluted with EtOAc (100 mL), and concentrated under reduced pressure. The resulting residue was purified by flash column chromatography (silica gel, hexanes:EtOAc 8:2) to afford alcohol **15** (3.03 g, 97%) as a colorless oil. **15**:  $R_f = 0.50$  (silica gel, hexanes:EtOAc 6:4); IR (film)  $\nu_{\max}$  3464, 2941, 2835, 1596, 1473, 1259, 1052, 808, 729  $\text{cm}^{-1}$ ;  $^1\text{H}$  NMR (400 MHz,  $\text{CDCl}_3$ ):  $\delta$  7.30 (dd,  $J = 8.3, 7.4$  Hz, 1H), 7.19 (t,  $J = 8.0$  Hz, 1H), 7.03 (dd,  $J = 7.4, 0.8$  Hz, 1H), 6.88 (ddd,  $J = 7.8, 1.8, 1.0$  Hz, 1H), 6.84 (dd,  $J = 2.6, 1.6$  Hz, 1H), 6.79 (d,  $J = 8.2$  Hz, 1H), 6.77–6.73 (m, 1H), 6.69 (d,  $J = 5.4$  Hz, 1H), 6.40 (d,  $J = 5.4$  Hz, 1H), 4.43 (d,  $J = 10.9$  Hz, 1H), 3.98 (d,  $J = 10.8$  Hz, 1H), 3.75 (s, 3H), 3.73 (s, 3H), 2.93 ppm (s, 1H);  $^{13}\text{C}$  NMR (100 MHz,  $\text{CDCl}_3$ ):  $\delta$  159.7, 155.2, 146.7, 143.4, 139.7, 135.0, 130.3, 129.7, 129.4, 119.6, 115.6, 113.6, 111.6, 109.3, 65.7, 65.0, 55.7, 55.2 ppm; HRMS calcd. For  $\text{C}_{18}\text{H}_{18}\text{O}_3\text{Na}^+ [\text{M} + \text{Na}]^+$  305.1154, found 305.1149.

(ii) To a stirring solution of chlorosulfonyl isocyanate (2.34 mL, 26.6 mmol) at 0 °C was added formic acid (1.42 mL, 26.6 mmol) with rapid stirring. The resulting mixture was stirred for 5 min before CH<sub>3</sub>CN (7.0 mL) was added and the resulting mixture was stirred at room temperature for 6 h. The resulting mixture was cooled to 0 °C before a solution of alcohol **15** (obtained above) and pyridine (2.14 mL, 26.6 mmol) in DMA (9.0 mL) was added dropwise. The resulting mixture was warmed to room temperature and stirred for 1.5 h before it was transferred to a separatory funnel containing water (100 mL). The resulting mixture was extracted with EtOAc (3 × 150 mL), combined organic layer washed with NaHCO<sub>3</sub> (100 mL, sat. aq.), dried over anhydrous Na<sub>2</sub>SO<sub>4</sub> and concentrated under reduced pressure. The resulting residue was purified by flash column chromatography (silica gel, hexanes:EtOAc 7:3) to afford sulfamate **16** (2.59 g, 67%) as a colorless oil. **16**: *R*<sub>f</sub> = 0.35 (silica gel, hexanes:EtOAc 7:3); IR (film)  $\nu_{\text{max}}$  3308, 3240, 2936, 2839, 1360, 1263, 1167, 955, 799, 540 cm<sup>-1</sup>; <sup>1</sup>H NMR (400 MHz, CDCl<sub>3</sub>):  $\delta$  7.28 (dd, *J* = 8.3, 7.4 Hz, 1H), 7.17 (t, 1H), 6.98 (d, 1H), 6.90–6.88 (m, 2H), 6.80 (d, *J* = 5.5 Hz, 1H), 6.78–6.73 (m, 1H), 6.71 (d, *J* = 8.3 Hz, 1H), 6.63 (d, *J* = 5.5 Hz, 1H), 5.32 (d, *J* = 9.5 Hz, 1H), 4.65 (s, 2H), 4.47 (d, *J* = 9.5 Hz, 1H), 3.74 (s, 3H), 3.71 ppm (s, 3H); <sup>13</sup>C NMR (100 MHz, CDCl<sub>3</sub>):  $\delta$  159.6, 155.8, 145.8, 142.3, 138.3, 133.0, 131.7, 130.2, 129.3, 119.5, 115.1, 113.5, 112.1, 109.5, 72.2, 60.9, 55.5, 55.3 ppm; HRMS calcd. For C<sub>18</sub>H<sub>19</sub>NO<sub>5</sub>SN<sup>+</sup> [M + Na]<sup>+</sup> 384.0882, found 384.0879.

### Cyclic Sulfamate **18**

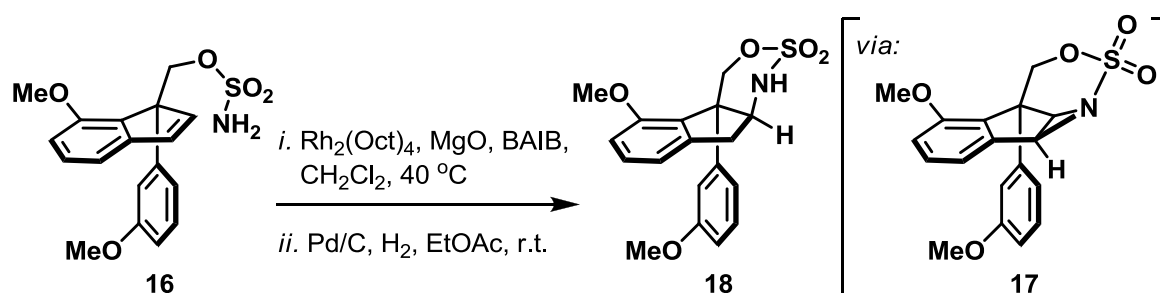

(i) To a stirred solution of sulfamate **16** (2.59 g, 7.17 mmol) in CH<sub>2</sub>Cl<sub>2</sub> (70.0 mL) at room temperature was added MgO (0.65 g, 16.5 mmol), Rh<sub>2</sub>(Oct)<sub>4</sub> (55.0 mg, 0.14 mmol) and BAIB (2.77 g, 8.6 mmol) sequentially. The resulting mixture was warmed to 40 °C and stirred for 4 h before it was cooled to room temperature, filtered through a pad of Celite<sup>®</sup> and eluted with CH<sub>2</sub>Cl<sub>2</sub> (30 mL), and concentrated under reduced pressure. The resulting residue was purified

by flash column chromatography (silica gel, hexanes:EtOAc 8:2) to afford aziridine **17** (2.25 g, 87%) as a white amorphous solid. **17**:  $R_f$  = 0.35 (silica gel, hexanes:EtOAc 7:3); IR (film)  $\nu_{\max}$  2943, 2839, 1737, 1584, 1487, 1375, 1266, 1185, 957, 780, 695, 452  $\text{cm}^{-1}$ ;  $^1\text{H}$  NMR (400 MHz,  $\text{CDCl}_3$ ):  $\delta$  7.40 (dd,  $J$  = 8.3, 7.5 Hz, 1H), 7.31 (t,  $J$  = 8.0 Hz, 1H), 7.26 (dd,  $J$  = 7.5, 0.8 Hz, 1H), 6.94 (dd,  $J$  = 8.3, 0.9 Hz, 1H), 6.88 (ddd,  $J$  = 8.3, 2.5, 0.9 Hz, 1H), 6.78 (ddd,  $J$  = 7.7, 1.8, 0.9 Hz, 1H), 6.71 (dd,  $J$  = 2.6, 1.7 Hz, 1H), 5.37 (d,  $J$  = 10.4 Hz, 1H), 4.97 (d,  $J$  = 10.4 Hz, 1H), 4.23 (d,  $J$  = 3.6 Hz, 1H), 4.05 (d,  $J$  = 3.6 Hz, 1H), 3.79 (s, 3H), 3.67 ppm (s, 3H);  $^{13}\text{C}$  NMR (100 MHz,  $\text{CDCl}_3$ ):  $\delta$  160.1, 155.9, 139.4, 137.2, 132.3, 131.2, 130.2, 119.3, 118.8, 113.4, 112.8, 112.7, 74.2, 58.0, 55.4, 52.6, 49.7 ppm; HRMS calcd. For  $\text{C}_{18}\text{H}_{17}\text{NO}_5\text{SNa}^+ [\text{M} + \text{Na}]^+$  382.0725, found 382.0727.

(ii) To a stirred solution of aziridine **17** (obtained above) in EtOAc (20.0 mL) at room temperature was added palladium on carbon (10 wt% on carbon, 1.00 g, 0.94 mmol). The resulting mixture was purged with hydrogen gas (balloon bubbling) for 1 min then stirred under an atmosphere of hydrogen (balloon) for 3 h. The resulting mixture was filtered through a pad of Celite<sup>®</sup> and eluted with acetone (100 mL), and concentrated under reduced pressure. The resulting residue was purified by flash column chromatography (silica gel, hexanes:EtOAc 4:1) to afford cyclic sulfamate **18** (2.12 g, 94%) as a white foam. **18**:  $R_f$  = 0.50 (silica gel, hexanes:EtOAc 7:3); IR (film)  $\nu_{\max}$  3256, 2945, 2842, 1730, 1584, 1424, 1363, 1182, 957, 775  $\text{cm}^{-1}$ ;  $^1\text{H}$  NMR (400 MHz,  $\text{CDCl}_3$ ):  $\delta$  7.36 (t,  $J$  = 7.9 Hz, 1H), 7.23 (t,  $J$  = 8.0 Hz, 1H), 6.95 (d,  $J$  = 7.4 Hz, 1H), 6.92 (d,  $J$  = 8.3 Hz, 1H), 6.79 (ddd,  $J$  = 7.8, 5.9, 2.1 Hz, 2H), 6.63 (t,  $J$  = 2.2 Hz, 1H), 5.43 (d,  $J$  = 12.2 Hz, 1H), 5.14 (d,  $J$  = 12.3 Hz, 1H), 4.53 (dd,  $J$  = 10.2, 5.2 Hz, 1H), 4.24 (d,  $J$  = 10.2 Hz, 1H), 3.83 (s, 3H), 3.73 (s, 3H), 3.04 (dd,  $J$  = 16.4, 5.4 Hz, 1H), 2.67 ppm (d,  $J$  = 16.4 Hz, 1H);  $^{13}\text{C}$  NMR (100 MHz,  $\text{CDCl}_3$ ):  $\delta$  160.0, 158.7, 142.5, 140.4, 130.9, 129.9, 127.3, 119.7, 118.8, 114.1, 112.5, 110.6, 76.8, 67.5, 55.6, 55.6, 55.3, 36.6 ppm; HRMS calcd. For  $\text{C}_{18}\text{H}_{19}\text{NO}_5\text{SNa}^+ [\text{M} + \text{Na}]^+$  384.0882, found 384.0877.

## Vinyl Iodide 20

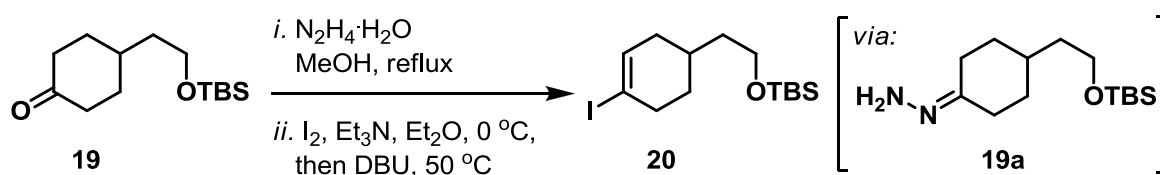

(i) To a stirred solution of ketone **19**<sup>[4]</sup> (0.56 g, 2.18 mmol) in MeOH (3.0 mL) at room temperature was added hydrazine hydrate (0.40 mL, 8.73 mmol). The resulting mixture was warmed to reflux and stirred for 14 h before it was cooled to room temperature and concentrated under reduced pressure to afford crude hydrazone **19a**, which was used directly in the subsequent reaction.

**Representative <sup>1</sup>H NMR (400 MHz, CDCl<sub>3</sub>, crude) of hydrazone 19a**

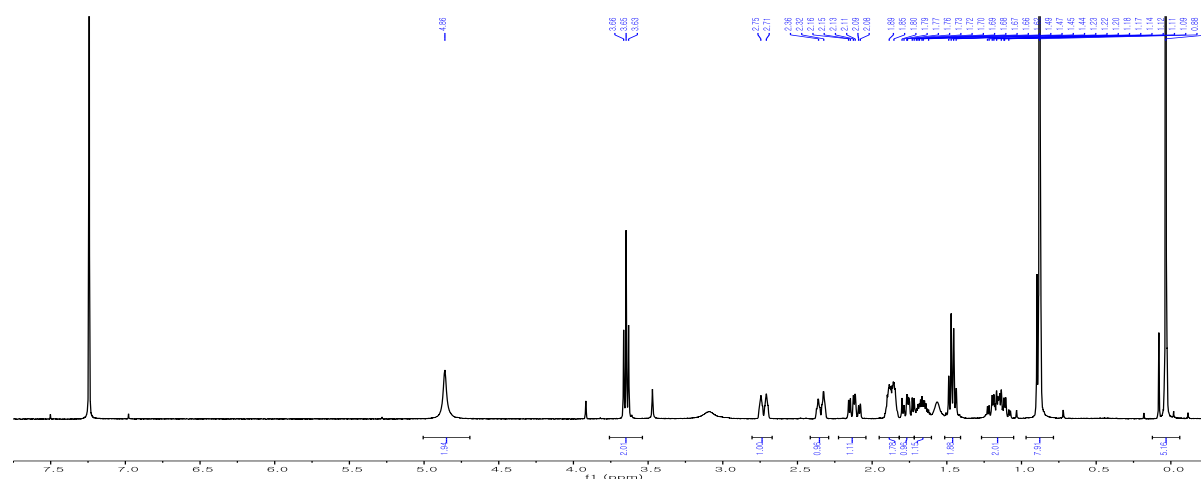

(ii) To a stirred solution of hydrazone **19a** (crude, 0.52 g, 1.92 mmol) in Et<sub>2</sub>O (18.0 mL) at 0 °C was added Et<sub>3</sub>N (2.70 mL, 19.4 mmol) and I<sub>2</sub> (0.97 g, 3.82 mmol). The resulting mixture was stirred for 25 min before it was warmed to room temperature, diluted with Et<sub>2</sub>O (15 mL) and quenched with Na<sub>2</sub>S<sub>2</sub>O<sub>3</sub> (20 mL, sat. aq.), and stirred for 45 min before it was extracted with Et<sub>2</sub>O (3 × 10 mL), combined organic layer dried over anhydrous Na<sub>2</sub>SO<sub>4</sub> and concentrated under reduced pressure. The resulting residue was dissolved in THF (3.0 mL) and treated with DBU (0.70 mL, 4.69 mmol) at room temperature, and warmed to 50 °C and stirred for 4 h before it was cooled to room temperature and concentrated under reduced pressure. The resulting residue was dissolved in CH<sub>2</sub>Cl<sub>2</sub> (10 mL) and washed with HCl (1 N aq., 10 mL), organic layer separated and dried over anhydrous Na<sub>2</sub>SO<sub>4</sub>, and concentrated under reduced pressure. The resulting residue was purified by flash column chromatography (silica gel, hexanes:Et<sub>2</sub>O 20:1) to afford vinyl iodide **20** (0.38 g, 48% over two steps) as a yellow amorphous solid. **20**: *R*<sub>f</sub> = 0.80 (silica gel, hexanes:Et<sub>2</sub>O 20:1); IR (film)  $\nu_{\text{max}}$  2927, 2857, 1472, 1256, 1104, 835, 774 cm<sup>-1</sup>; <sup>1</sup>H NMR (400 MHz, CDCl<sub>3</sub>):  $\delta$  6.26 (ddd, *J* = 6.0, 3.3, 1.9 Hz, 1H), 3.63 (t, *J* = 6.5 Hz, 2H), 2.56–2.46 (m, 2H), 2.20–2.07 (m, 1H), 1.84–1.66 (m,

3H), 1.55–1.35 (m, 3H), 0.87 (s, 9H), 0.02 ppm (s, 6H);  $^{13}\text{C}$  NMR (101 MHz,  $\text{CDCl}_3$ ):  $\delta$  136.8, 96.4, 60.8, 39.2, 38.7, 35.5, 31.4, 28.7, 25.9, 18.3, –5.3 ppm.

### Quinolinamide **22**

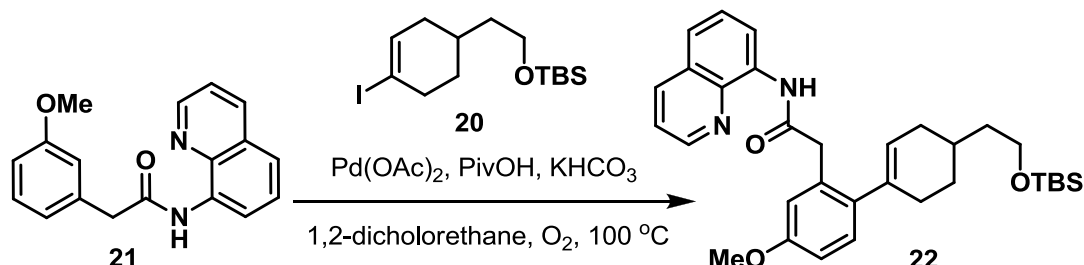

To a stirred solution of quinolinamide **21**<sup>[5]</sup> (0.16 g, 0.55 mmol) and vinyl iodide **20** (0.30 g, 0.82 mmol) in 1,2-dichloroethane (6.0 mL) at room temperature was added  $\text{Pd}(\text{OAc})_2$  (12.3 mg, 55  $\mu\text{mol}$ ), PivOH (11.2 mg, 0.11 mmol) and  $\text{KHCO}_3$  (0.11 g, 1.09 mmol). The resulting mixture was evacuated and filled with oxygen (3  $\times$ ) before it was placed into a pre-heated (100  $^\circ\text{C}$ ) oil bath and stirred for 14 h. The resulting mixture was cooled to room temperature, filtered through a pad of silica gel and eluted with hexane:EtOAc (1:1, 150 mL), and concentrated under reduced pressure. The resulting residue was resubjected to the identical aerobic CH-alkenylation condition [ $\text{Pd}(\text{OAc})_2$  (12.3 mg, 55  $\mu\text{mol}$ ), PivOH (11.2 mg, 0.11 mmol) and  $\text{KHCO}_3$  (0.11 g, 1.09 mmol), 1,2-dichloroethane (6.0 mL),  $\text{O}_2$ , 100  $^\circ\text{C}$ , 14 h] and the resulting residue was purified by flash column chromatography (silica gel, hexanes:EtOAc 10:1 $\rightarrow$ 1:1) to afford quinolinamide **22** (0.15 g, 53%) as a yellow amorphous solid. **22**:  $R_f$  = 0.40 (silica gel, hexanes:Et<sub>2</sub>O 1:1); IR (film)  $\nu_{\text{max}}$  3352, 2927, 2856, 1687, 1525, 1485, 1255, 1100, 834  $\text{cm}^{-1}$ ;  $^1\text{H}$  NMR (400 MHz,  $\text{CDCl}_3$ ):  $\delta$  9.84 (s, 1H), 8.73 (d,  $J$  = 7.3 Hz, 1H), 8.66 (d,  $J$  = 4.3 Hz, 1H), 8.10 (d,  $J$  = 8.3 Hz, 1H), 7.54–7.45 (m, 2H), 7.45–7.37 (m, 1H), 7.08 (d,  $J$  = 8.5 Hz, 1H), 6.97 (s, 1H), 6.82 (d,  $J$  = 8.5 Hz, 1H), 5.63 (d,  $J$  = 4.3 Hz, 1H), 3.83 (s, 2H), 3.81 (d,  $J$  = 1.6 Hz, 3H), 3.63 (t,  $J$  = 6.9 Hz, 2H), 2.36–2.14 (m, 3H), 1.84–1.75 (m, 3H), 1.59–1.45 (m, 2H), 1.38 (tt,  $J$  = 16.2, 7.8 Hz, 1H), 0.87 (s, 9H), 0.06 ppm (s, 6H);  $^{13}\text{C}$  NMR (101 MHz,  $\text{CDCl}_3$ ):  $\delta$  169.9, 158.5, 148.0, 138.5, 137.4, 136.1, 134.5, 133.1, 130.0, 127.8, 127.3, 126.7, 121.5, 121.4, 116.3, 115.2, 113.4, 77.2, 61.3, 55.3, 43.1, 39.3, 32.1, 31.0, 29.8, 29.3, 26.0, 18.3, –5.3 ppm; HRMS calcd. For  $\text{C}_{32}\text{H}_{43}\text{N}_2\text{O}_3\text{SiNa}^+$  [ $\text{M} + \text{H}$ ] $^+$  531.3037, found 531.3041.

22: R = H  
 Boc-22: R = Boc

i.  $\text{Boc}_2\text{O}$ , DMAP,  $\text{CH}_3\text{CN}$ ,  $60^\circ\text{C}$   
 ii.  $\text{LiOH}\cdot\text{H}_2\text{O}$ ,  $\text{THF}:\text{H}_2\text{O}$ ,  $60^\circ\text{C}$

8

S11

temperature, filtered through a pad of silica gel and eluted with hexane:EtOAc (2:1, 150 mL), and concentrated under reduced pressure to afford Boc-carbamate **Boc-22**, which was used directly in the subsequent reaction.

(ii) To a stirred solution of Boc-carbamate **Boc-22** in THF/H<sub>2</sub>O (4.0 mL, 3:1) at room temperature was added LiOH•H<sub>2</sub>O (0.16 g, 3.81 mmol). The resulting mixture was warmed to 60 °C and stirred for 2 h before it was cooled to room temperature, diluted with HCl (1 N aq., 20 mL) and extracted with EtOAc (3 × 15 mL), combined organic layer dried over anhydrous Na<sub>2</sub>SO<sub>4</sub> and concentrated under reduced pressure. The resulting residue was purified by flash column chromatography (silica gel, hexanes:EtOAc 8:1→1:6) to afford carboxylic acid **8** (0.14 g, 78% over two steps) as a yellow amorphous solid and recovered Boc-8-aminoquinoline (82.0 mg, 75% over two steps). **8**: *R*<sub>f</sub> = 0.59 (silica gel, hexanes:EtOAc 1:2); IR (film)  $\nu_{\text{max}}$  2927, 1709, 1608, 1257, 1101, 750 cm<sup>-1</sup>; <sup>1</sup>H NMR (400 MHz, CDCl<sub>3</sub>):  $\delta$  7.03 (d, *J* = 8.1 Hz, 1H), 6.86–6.71 (m, 2H), 5.49 (br s, 1H), 3.77 (s, 3H), 3.70 (t, *J* = 6.8 Hz, 2H), 3.64 (s, 2H), 2.34–2.11 (m, 3H), 1.90–1.66 (m, 3H), 1.63–1.49 (m, 2H), 1.43–1.29 (m, 1H), 0.90 (s, 9H), 0.06 ppm (s, 6H); <sup>13</sup>C NMR (101 MHz, CDCl<sub>3</sub>):  $\delta$  177.9, 158.1, 137.2, 137.0, 131.8, 129.6, 126.5, 115.5, 112.8, 61.3, 55.2, 39.2, 38.6, 32.1, 30.7, 29.7, 29.3, 26.0, 18.4, –5.3 ppm; HRMS calcd. For C<sub>23</sub>H<sub>36</sub>O<sub>4</sub>SiNa<sup>+</sup> [M + Na]<sup>+</sup> 427.2275, found 427.2280.



## Hydroxy Amide 23

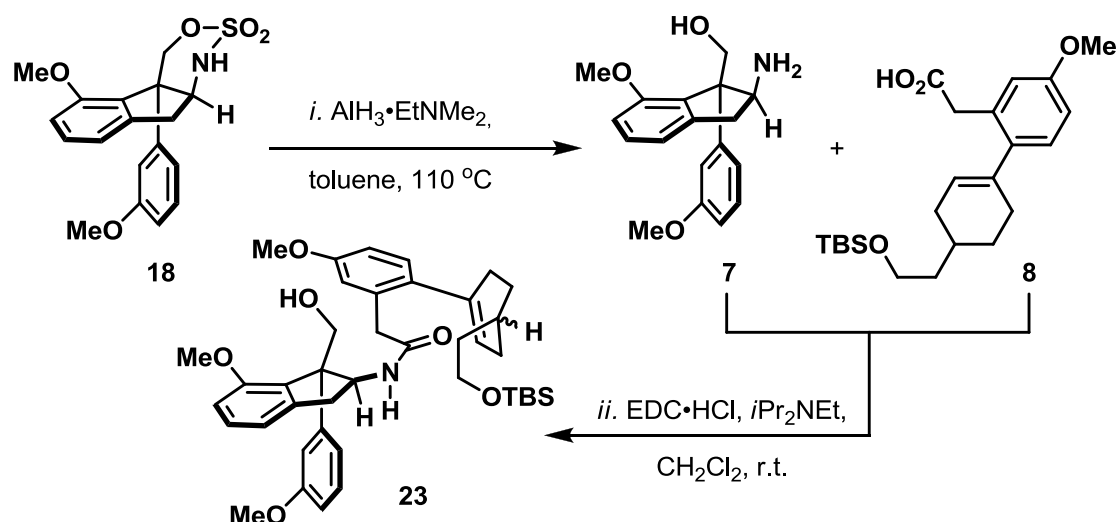

(i) To a stirred solution of cyclic sulfamate **18** (1.0 g, 2.77 mmol) in toluene (30 mL) at room temperature was added  $\text{AlH}_3 \cdot \text{EtNMe}_2$  (0.5 M in toluene, 33 mL, 16.6 mmol). The resulting mixture was warmed to  $110\text{ }^\circ\text{C}$  and stirred for 6 h before it was cooled to  $0\text{ }^\circ\text{C}$  and quenched with sodium potassium tartrate (100 mL, sat. aq.). The resulting mixture was warmed to room temperature and stirred for 30 min before it was extracted with EtOAc ( $3 \times 100\text{ mL}$ ), combined organic layer washed with brine (100 mL), dried over anhydrous  $\text{Na}_2\text{SO}_4$  and concentrated under reduced pressure to afford crude amino-alcohol **7** (809 mg, 98%) as a yellow oil.<sup>[6,7]</sup> Trituration of crude amino-alcohol **7** with  $\text{CH}_3\text{CN}$  afforded a white powdery solid to facilitate transfer and storage. **7**:  $R_f = 0.17$  (silica gel,  $\text{CH}_2\text{Cl}_2$ :MeOH 10:1); IR (film)  $\nu_{\text{max}}$  3344, 2998, 2938, 2835, 1591, 1481, 1264, 1064,  $774\text{ cm}^{-1}$ ;  $^1\text{H}$  NMR [400 MHz,  $\text{CDCl}_3$  + 1.0 %  $\text{NH}_4\text{OH}(\text{aq.})$ ]:  $\delta$  7.24 (t,  $J = 8.3$ , 1H), 7.15 (t,  $J = 8.3$ , 1H), 6.89 (dq,  $J = 7.5$ , 1.0 Hz, 1H), 6.81–6.74 (m, 3H), 6.74–6.68 (m, 1H), 4.38 (d,  $J = 11.5\text{ Hz}$ , 1H), 4.29 (d,  $J = 11.5\text{ Hz}$ , 1H), 3.83 (dd,  $J = 6.8$ , 5.2 Hz, 1H), 3.72 (s, 3H), 3.65 (s, 3H), 3.14 (dd,  $J = 15.7$ , 6.8 Hz, 1H), 2.66 ppm (dd,  $J = 15.7$ , 5.2 Hz, 1H);  $^{13}\text{C}$  NMR [101 MHz,  $\text{CDCl}_3$  + 1.0 %  $\text{NH}_4\text{OH}(\text{aq.})$ ]:  $\delta$  159.4, 157.2, 146.5, 144.2, 131.7, 129.2, 128.9, 119.2, 117.9, 113.2, 110.9, 109.6, 65.9, 65.1, 61.0, 55.3, 55.1, 41.3 ppm; HRMS calcd. For  $\text{C}_{18}\text{H}_{22}\text{NO}_3^+$   $[\text{M} + \text{H}]^+$  300.1594, found 300.1597.

[Note:  $^1\text{H}$  NMR of amino alcohol **7** in deuterated chloroform exhibited significant differences depending on the acid content of the deuterated solvent:  $^1\text{H}$  NMR (400 MHz) of amino alcohol **7** in (a)  $\text{CDCl}_3$ ; (b)  $\text{CDCl}_3$  with 1.0 % of  $\text{NH}_4\text{OH}(\text{aq.})$ )

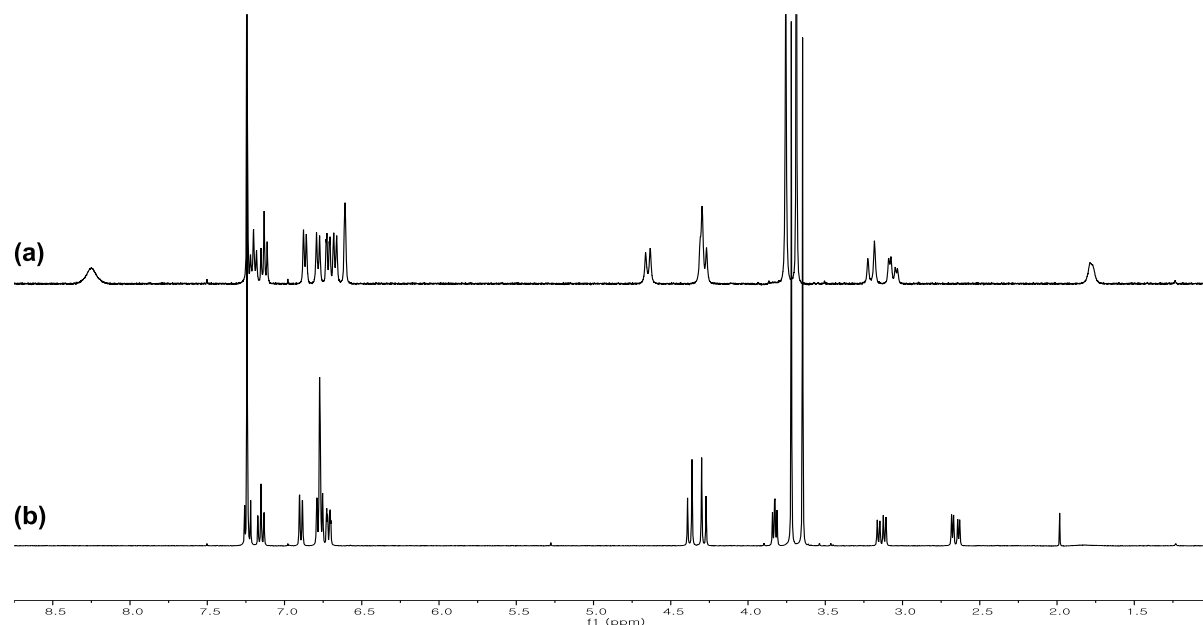

$^1\text{H}$  NMR (400 MHz,  $\text{CDCl}_3$ ) of amino-alcohol **7** reported by Weinreb and co-worker<sup>[6]</sup>

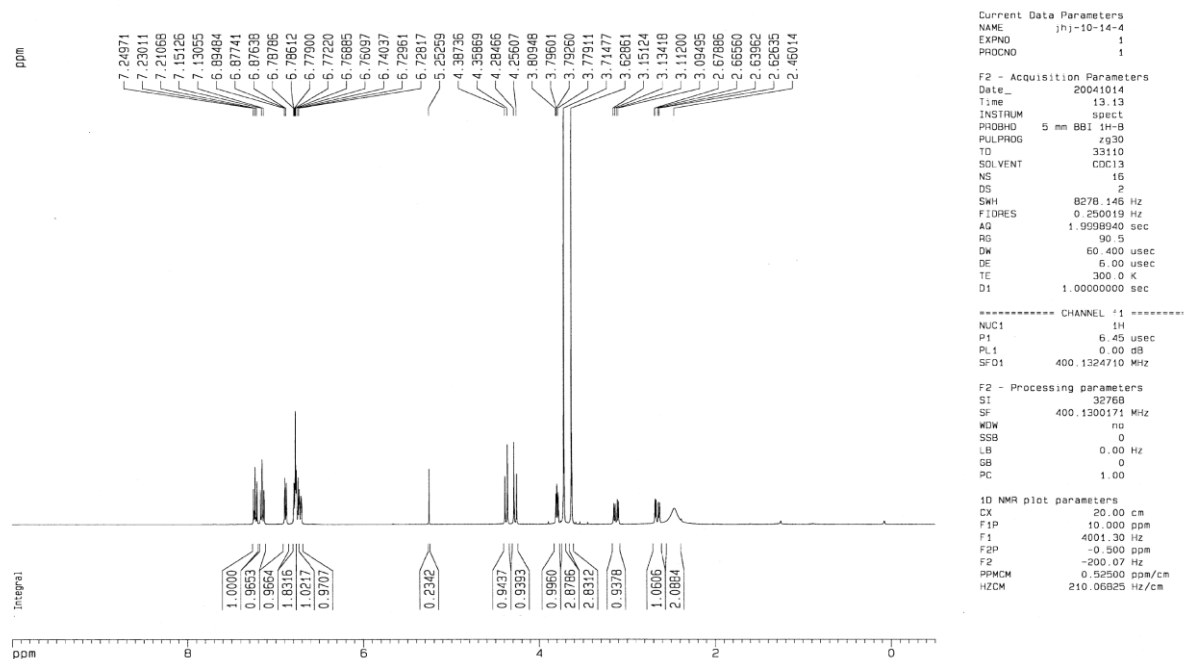

## Schematic summary for the gram-scale synthesis of amino-alcohol 7

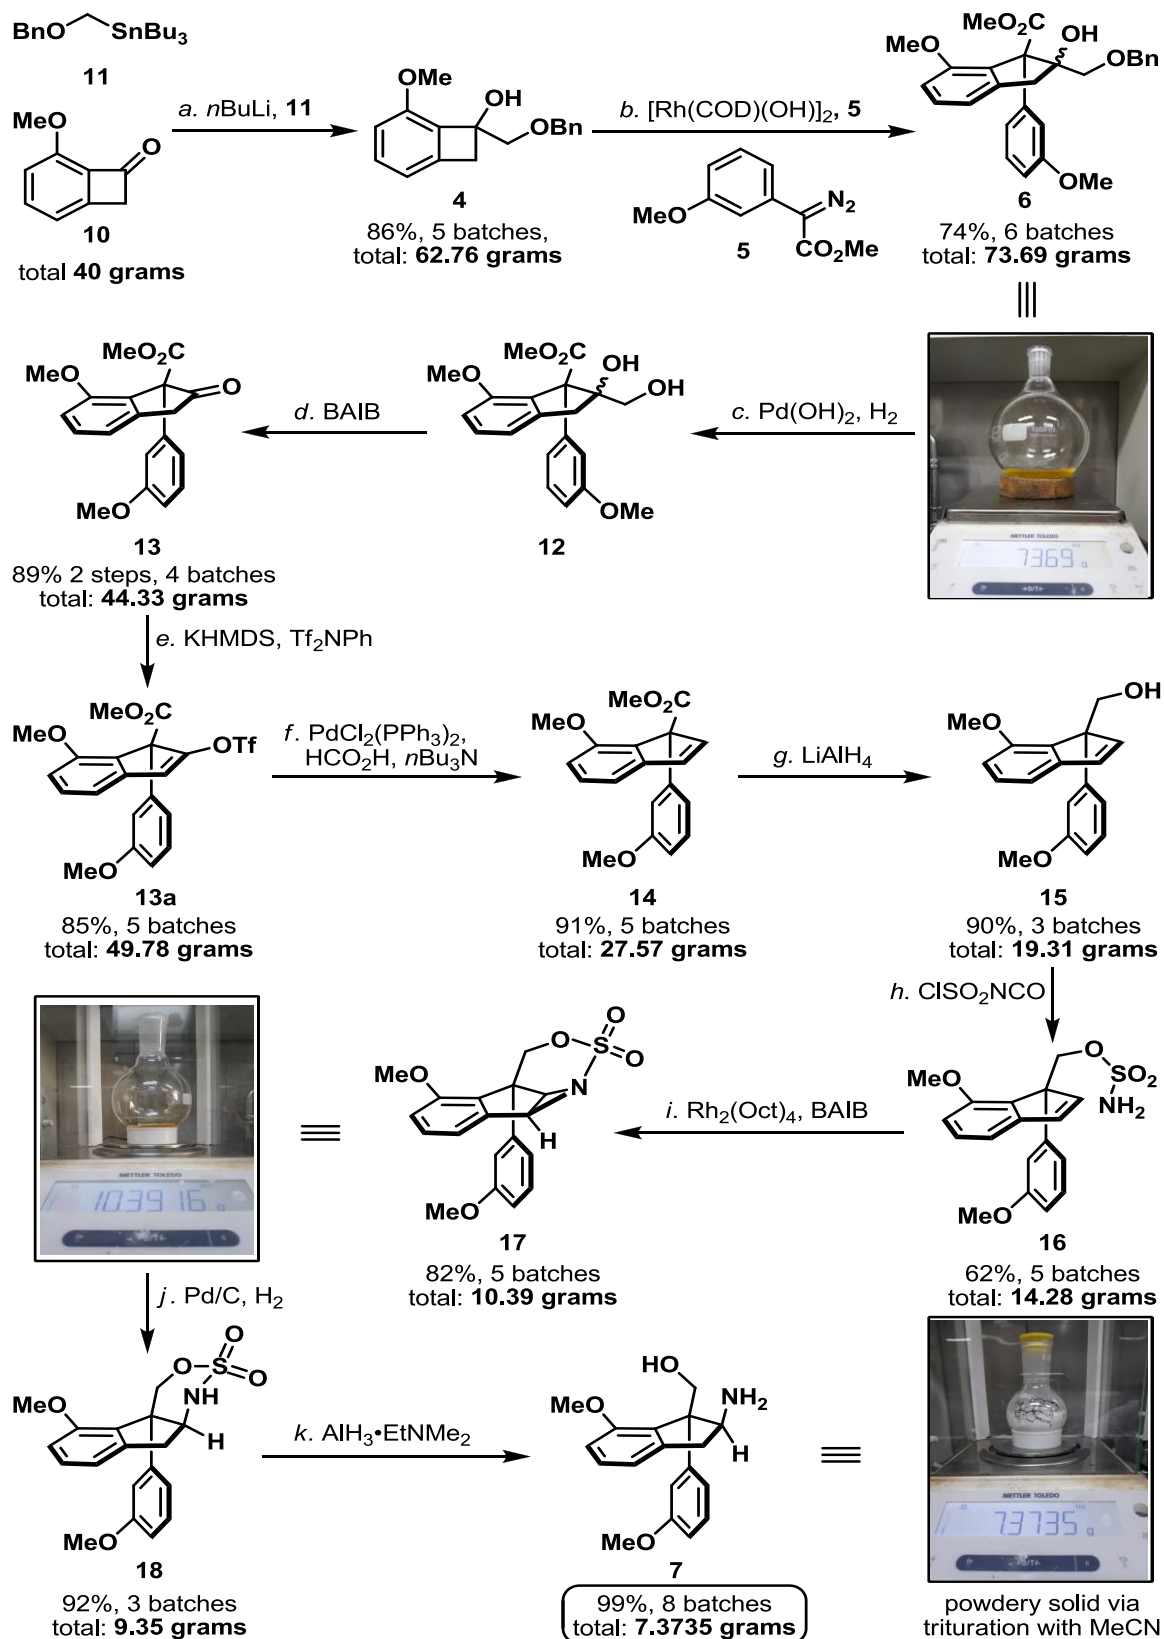

\* % yield represent average yield over the indicated batches

(ii) To a stirred solution of crude amino-alcohol **7** (0.23 g, 0.78 mmol) in CH<sub>2</sub>Cl<sub>2</sub> (8.2 mL) at room temperature was added carboxylic acid **8** (0.33 g, 0.82 mmol), EDC•HCl (0.16 mg, 0.84 mmol) and *i*Pr<sub>2</sub>NEt (0.3 mL, 1.7 mmol). The resulting mixture was stirred for 14 h before it was quenched with NH<sub>4</sub>Cl (10 mL, sat. aq.), extracted with CH<sub>2</sub>Cl<sub>2</sub> (3 × 10 mL), combined organic layer dried over anhydrous Na<sub>2</sub>SO<sub>4</sub> and concentrated under reduced pressure. The resulting residue was purified by flash column chromatography (silica gel, hexanes:EtOAc 4:1→1:3) to afford hydroxy amide **23** (0.29 g, 54% over two steps) as a brown amorphous solid. **23**: *R*<sub>f</sub> = 0.50 (silica gel, hexanes:EtOAc 1:1); IR (film)  $\nu_{\text{max}}$  3334, 2927, 2856, 1729, 1648, 1479, 1258, 1099, 835 cm<sup>-1</sup>; <sup>1</sup>H NMR (400 MHz, CDCl<sub>3</sub>, 1:1 mixture of diastereoisomers):  $\delta$  7.31–7.22 (m, 1H), 7.20–7.12 (m, 1H), 7.11 (d, *J* = 8.0 Hz, 1H), 6.94 (dd, *J* = 8.4, 1.9 Hz, 1H), 6.87 (d, *J* = 7.4 Hz, 1H), 6.85–6.77 (m, 2H), 6.75–6.66 (m, 2H), 6.61–6.54 (m, 1H), 6.46 (br t, *J* = 2.2 Hz, 1H), 5.30 (br s, 1H), 4.79–4.86 (m, 1H), 4.21–4.05 (m, 2H), 3.77–3.72 (m, 6H), 3.70–3.65 (m, 5H), 3.49 (s, 2H), 2.99 (dd, *J* = 16.3, 5.9 Hz, 1H), 2.65 (dd, *J* = 16.3, 6.2 Hz, 1H), 2.48 (td, *J* = 9.6, 4.9 Hz, 1H), 2.21–1.98 (m, 2H), 1.72–1.58 (m, 2H), 1.56–1.42 (m, 2H), 1.36–1.22 (m, 2H), 0.90 (s, 9H), 0.07 ppm (s, 6H); <sup>13</sup>C NMR (101 MHz, CDCl<sub>3</sub>, 1:1 mixture of diastereoisomers):  $\delta$  171.7, 159.5, 158.3, 156.7, 156.7, 145.2, 145.1, 144.0, 137.4, 137.4, 137.2, 133.2, 129.8, 129.7, 129.7, 129.5, 129.2, 126.3, 126.3, 119.1, 118.7, 118.6, 114.9, 114.9, 113.2, 113.1, 111.5, 109.2, 109.2, 66.1, 66.0, 62.4, 62.4, 62.1, 62.1, 61.3, 61.3, 55.4, 55.3, 55.0, 41.6, 39.4, 39.3, 38.7, 32.0, 30.9, 30.8, 29.6, 29.4, 29.3, 26.0, 18.4, –5.2, –5.2 ppm; HRMS calcd. For C<sub>41</sub>H<sub>55</sub>NO<sub>6</sub>SiNa<sup>+</sup> [M + Na]<sup>+</sup> 708.3691, found 708.3692.

## Lactam **25**

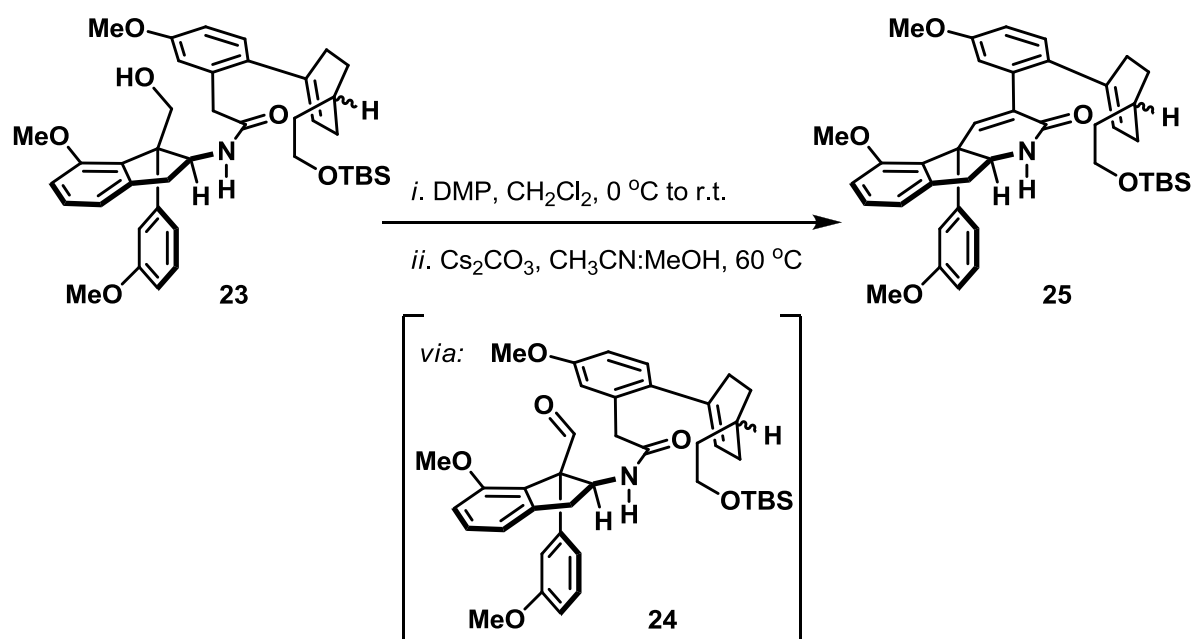

(i) To a stirred solution of alcohol **23** (0.22 g, 0.32 mmol) in  $\text{CH}_2\text{Cl}_2$  (6.0 mL) at 0 °C was added Dess-Martin periodinane (0.19 g, 0.45 mmol). The resulting mixture was warmed to room temperature and stirred for 4 h before it was quenched with  $\text{Na}_2\text{S}_2\text{O}_3$  (5 mL, sat. aq.), extracted with  $\text{CH}_2\text{Cl}_2$  ( $3 \times 10$  mL), combined organic layer washed with  $\text{NaHCO}_3$  (20 mL, sat. aq.), dried over anhydrous  $\text{Na}_2\text{SO}_4$  and concentrated under reduced pressure. The resulting residue was purified by flash column chromatography (silica gel, hexanes:EtOAc 3:1) to afford aldehyde **24** (0.20 g, 93%) as a white amorphous solid. **24**:  $R_f = 0.54$  (silica gel, hexanes:EtOAc 2:1); IR (film)  $\nu_{\text{max}}$  3406, 2927, 1709, 1605, 1481, 1267, 1087, 834, 775  $\text{cm}^{-1}$ ;  $^1\text{H}$  NMR (400 MHz,  $\text{CDCl}_3$ , 1:1 mixture of diastereoisomers):  $\delta$  9.66 (dd,  $J = 5.0, 1.5$  Hz, 1H), 7.29 (t,  $J = 7.8$  Hz, 1H), 7.20 (t,  $J = 7.8$  Hz, 1H), 7.05 (d,  $J = 8.3$  Hz, 1H), 6.87 (d,  $J = 7.7$  Hz, 2H), 6.84–6.74 (m, 4H), 6.62–6.54 (m, 2H), 5.46 (s, 1H), 4.75 (dtd,  $J = 9.2, 7.6, 1.6$  Hz, 1H), 3.78 (s, 3H), 3.74–3.67 (m, 5H), 3.59 (s, 3H), 3.55–3.39 (m, 2H), 3.31–3.20 (dd, 15.8, 7.2 Hz, 1H), 2.67 (ddd,  $J = 15.8, 7.5, 2.7$  Hz, 1H), 2.24–2.06 (m, 3H), 1.86–1.69 (m, 3H), 1.59–1.49 (m, 2H), 1.38 (dq,  $J = 11.1, 5.2$  Hz, 1H), 0.90 (s, 9H), 0.06 ppm (s, 6H);  $^{13}\text{C}$  NMR (101 MHz,  $\text{CDCl}_3$ , 1:1 mixture of diastereoisomers):  $\delta$  198.6, 198.6, 171.4, 159.8, 158.4, 156.6, 144.5, 139.9, 139.9, 137.4, 137.4, 137.2, 137.2, 133.0, 133.0, 130.8, 130.0, 130.0, 129.4, 126.5, 126.5, 126.2, 126.2, 119.5, 119.5, 117.8, 115.0, 113.4, 113.4, 113.3, 113.2, 112.5, 112.5, 109.9, 69.7, 69.7, 61.4, 61.3, 61.3, 61.3, 55.3, 55.2, 55.1, 41.5, 41.4, 39.4, 39.4,

37.9, 32.1, 32.1, 30.9, 30.9, 29.8, 29.7, 29.3, 29.3, 26.0, 18.4, -5.2 ppm; HRMS calcd. For  $C_{41}H_{53}NO_6SiNa^+$   $[M + Na]^+$  706.3534, found 706.3539.

(ii) To a stirred solution of aldehyde **24** (0.16 g, 0.24 mmol) in  $CH_3CN/MeOH$  (10:1, 11 mL) at room temperature was added  $Cs_2CO_3$  (0.31 g, 0.95 mmol). The resulting mixture was placed into a pre-heated (60 °C) oil bath and stirred for 8 h before it was cooled to room temperature and concentrated under reduced pressure. The resulting residue was diluted with  $H_2O/CH_2Cl_2$  (1:1, 10 mL), extracted with  $CH_2Cl_2$  ( $3 \times 10$  mL), combined organic layer dried over anhydrous  $Na_2SO_4$  and concentrated under reduced pressure. The resulting residue was purified by flash column chromatography (silica gel, hexanes:EtOAc 4:1→1:3) to afford lactam **25** (99.7 mg, 63%) as an orange foam. [Note: Intramolecular aldol condensation of aldehyde **24** under the conditions described by Weinreb<sup>[6]</sup> and Wipf<sup>[7]</sup> groups ( $K_2CO_3$ , MeOH, 60 °C) afforded lactam **25** in significantly lower yield]. **25**:  $R_f$  = 0.17 (silica gel, hexanes:EtOAc 2:1); IR (film)  $\nu_{max}$  3200, 2927, 1676, 1480, 1255, 1079, 834, 775  $cm^{-1}$ ;  $^1H$  NMR (400 MHz,  $CDCl_3$ , 1:1 mixture of diastereoisomers):  $\delta$  7.31–7.16 (m, 2H), 7.05 (d,  $J$  = 8.4 Hz, 1H), 6.91 (dt,  $J$  = 7.8, 2.2 Hz, 2H), 6.84–6.64 (m, 6H), 5.83 (br s, 1H), 5.41–5.33 (m, 1H), 4.15 (tq,  $J$  = 6.4, 3.0 Hz, 1H), 3.79 (s, 3H), 3.72 (s, 3H), 3.64 (td,  $J$  = 6.7, 3.2 Hz, 2H), 3.59 (s, 3H), 3.33 (ddd,  $J$  = 15.7, 7.1, 4.4 Hz, 1H), 2.92 (dd,  $J$  = 15.7, 6.5 Hz, 1H), 2.37–2.24 (m, 0.5H), 2.18 (s, 1H), 2.22–2.13 (m, 0.5H), 2.11–1.96 (m, 1H), 1.72–1.60 (m, 1H), 1.60–1.50 (m, 1H), 1.49–1.39 (m, 2H), 1.29–1.21 (m, 1H), 1.14–0.98 (m, 1H), 0.90 (d,  $J$  = 2.2 Hz, 9H), 0.06 ppm (d,  $J$  = 2.4 Hz, 6H);  $^{13}C$  NMR (101 MHz,  $CDCl_3$ , 1:1 mixture of diastereoisomers):  $\delta$  164.4, 164.3, 159.7, 157.7, 157.7, 156.5, 145.6, 145.5, 143.0, 139.9, 139.6, 138.2, 138.1, 136.6, 136.1, 135.9, 134.4, 134.0, 130.5, 130.4, 129.7, 129.3, 128.8, 128.7, 126.0, 125.9, 119.1, 117.4, 117.3, 115.8, 115.7, 113.1, 112.9, 111.7, 110.0, 64.2, 64.2, 61.4, 61.4, 55.7, 55.3, 55.1, 55.1, 41.3, 41.1, 39.4, 32.3, 30.0, 29.9, 29.6, 29.6, 29.1, 26.0, 18.4, -5.2, -5.2 ppm; HRMS calcd. For  $C_{41}H_{51}NO_5SiNa^+$   $[M + Na]^+$  688.3429, found 688.3431.

## Tosylate **27**

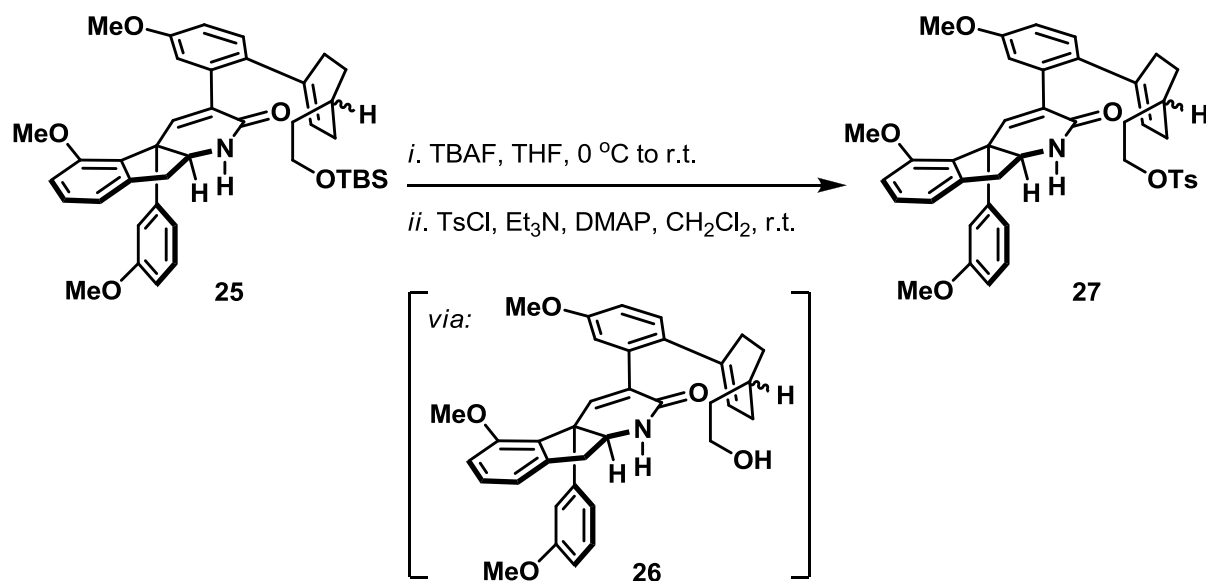

(i) To a stirred solution of TBS ether **25** (58 mg, 87  $\mu$ mol) in THF (1.0 mL) at 0 °C was added TBAF (1.0 M in THF, 0.17 mL, 0.17 mmol). The resulting mixture was warmed to room temperature and stirred for 14 h before it was quenched with NH<sub>4</sub>Cl (5 mL, sat. aq.), extracted with EtOAc (3  $\times$  5 mL), combined organic layer dried over anhydrous Na<sub>2</sub>SO<sub>4</sub> and concentrated under reduced pressure. The resulting residue was purified by flash column chromatography (silica gel, hexanes:EtOAc 2:1 $\rightarrow$ 1:5) to afford alcohol **26** (40 mg, 83%) as a white foam. **26**:  $R_f$  = 0.35 (silica gel, hexanes:EtOAc 1:3); IR (film)  $\nu_{\max}$  3279, 2919, 1672, 1601, 1480, 1265, 1051, 778 cm<sup>-1</sup>; <sup>1</sup>H NMR (400 MHz, CDCl<sub>3</sub>, 1:1 mixture of diastereoisomers):  $\delta$  7.32–7.11 (m, 2H), 7.05 (dd,  $J$  = 8.4, 1.5 Hz, 1H), 6.98–6.87 (m, 2H), 6.87–6.60 (m, 6H), 6.48 (s, 0.5H), 6.39 (s, 0.5H), 5.37 (s, 1H), 4.19–4.10 (m, 1H), 3.79 (d,  $J$  = 1.8 Hz, 3H), 3.72 (s, 3H), 3.61 (d,  $J$  = 5.3 Hz, 3H), 3.67–3.60 (m, 2H), 3.29 (dt,  $J$  = 14.8, 6.8 Hz, 1H), 2.90 (ddd,  $J$  = 15.7, 6.3, 2.8 Hz, 1H), 2.36–2.24 (m, 0.5H), 2.23–2.14 (m, 1.5H), 2.12–1.96 (m, 1H), 1.72–1.37 (m, 5H), 1.37–1.24 (m, 1H), 1.19–1.07 ppm (m, 1H); <sup>13</sup>C NMR (101 MHz, CDCl<sub>3</sub>, 1:1 mixture of diastereoisomers):  $\delta$  164.6, 159.6, 157.7, 157.7, 156.5, 145.6, 145.5, 143.1, 134.0, 139.9, 138.2, 138.1, 136.4, 136.1, 136.0, 134.4, 134.2, 130.5, 130.4, 129.6, 129.3, 128.7, 128.6, 125.8, 125.7, 119.1, 117.3, 115.8, 115.7, 113.0, 112.9, 111.8, 109.9, 64.2, 60.9, 55.7, 55.6, 55.3, 55.1, 41.0, 40.9, 38.8, 38.6, 32.1, 32.0, 29.5, 29.4, 29.3, 29.2, 28.9, 28.8 ppm; HRMS calcd. For C<sub>35</sub>H<sub>37</sub>NO<sub>5</sub>Na<sup>+</sup> [M + Na]<sup>+</sup> 574.2564, found 574.2566.

(ii) To a stirred solution of alcohol **26** (40 mg, 73  $\mu\text{mol}$ ) in  $\text{CH}_2\text{Cl}_2$  (1.0 mL) at room temperature was added TsCl (28 mg, 0.15 mmol), DMAP (1.8 mg, 15  $\mu\text{mol}$ ), and  $\text{Et}_3\text{N}$  (50  $\mu\text{L}$ , 0.36 mmol). The resulting mixture was stirred for 4 h before it was diluted with brine (3 mL), extracted with  $\text{CH}_2\text{Cl}_2$  ( $3 \times 5$  mL), combined organic layer dried over anhydrous  $\text{Na}_2\text{SO}_4$  and concentrated under reduced pressure. The resulting residue was purified by flash column chromatography (silica gel, hexanes:EtOAc 3:1 $\rightarrow$ 1:2) to afford tosylate **27** (45 mg, 88%) as a yellow amorphous solid. **27**:  $R_f$  = 0.5 (silica gel, hexanes:EtOAc 1:2); IR (film)  $\nu_{\text{max}}$  3201, 2925, 1674, 1601, 1480, 1358, 1260, 1175, 1077, 810  $\text{cm}^{-1}$ ;  $^1\text{H}$  NMR (400MHz,  $\text{CDCl}_3$ , 1:1 mixture of diastereoisomers):  $\delta$  7.79 (dd,  $J$  = 8.2, 3.2 Hz, 2H), 7.34 (dd,  $J$  = 8.3, 3.4 Hz, 2H), 7.28–7.16 (m, 2H), 7.02 (d,  $J$  = 8.5 Hz, 1H), 6.95–6.86 (m, 2H), 6.83–6.63 (m, 6H), 6.03 (d,  $J$  = 11.0 Hz, 0.4H), 5.87 (br s, 0.6H), 5.45–5.23 (m, 1H), 4.21–4.11 (m, 1H), 4.10–3.99 (m, 2H), 3.79 (s, 3H), 3.72 (d,  $J$  = 1.6 Hz, 3H), 3.59 (d,  $J$  = 2.7 Hz, 3H), 3.33 (td,  $J$  = 15.3, 6.9 Hz, 1H), 2.88 (dt,  $J$  = 15.8, 5.7 Hz, 1H), 2.43 (s, 3H), 2.31–2.18 (m, 1H), 2.15 (s, 2H), 2.06–1.93 (m, 1H), 1.61–1.47 (m, 4H), 1.14–0.95 ppm (m, 1H);  $^{13}\text{C}$  NMR (101 MHz,  $\text{CDCl}_3$ , 1:1 mixture of diastereoisomers):  $\delta$  164.4, 164.3, 159.7, 157.8, 157.8, 156.5, 145.6, 145.5, 144.7, 143.0, 143.0, 140.1, 139.8, 138.3, 138.2, 136.2, 136.1, 136.1, 136.0, 134.3, 134.0, 133.2, 130.5, 130.4, 129.9, 129.8, 129.7, 129.3, 128.7, 128.6, 127.9, 125.2, 125.2, 119.0, 117.4, 117.4, 115.8, 113.1, 112.9, 111.7, 110.0, 68.9, 64.2, 64.2, 55.7, 55.3, 55.1, 41.1, 41.0, 34.8, 34.6, 31.5, 31.4, 29.5, 29.0, 28.9, 28.6, 28.5, 21.6 ppm; HRMS calcd. For  $\text{C}_{42}\text{H}_{43}\text{NO}_7\text{SNa}^+$  [ $\text{M} + \text{Na}$ ] $^+$  728.2652, found 728.2655.

### Amine 9

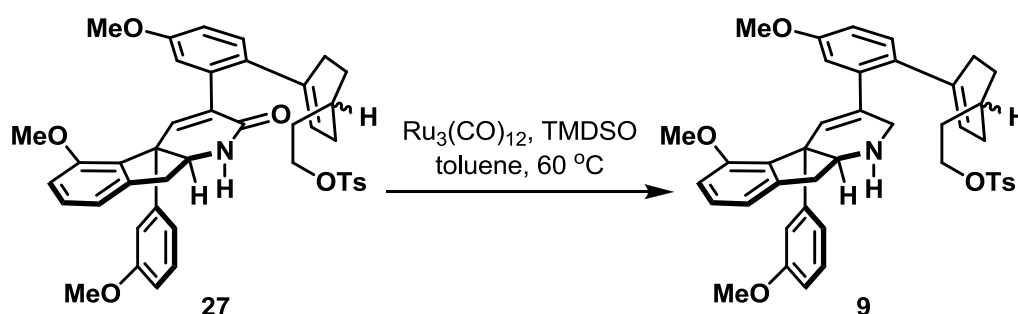

To a stirred solution of amide **27** (79.0 mg, 0.11 mmol) in toluene (2.0 mL) at room temperature was added  $\text{Ru}_3(\text{CO})_{12}$  (7.2 mg, 11  $\mu\text{mol}$ ) and TMDSO (0.20 mL, 1.12 mmol).



The resulting mixture was evacuated and filled with argon (3 ×) before it was placed into a pre-heated (60 °C) oil bath and stirred for 14 h. The resulting mixture was cooled to room temperature before it was quenched with NaOH (1.0 M aq)/CH<sub>2</sub>Cl<sub>2</sub> (1:1, 5 mL) and stirred for 30 min. The resulting mixture was diluted with H<sub>2</sub>O/CH<sub>2</sub>Cl<sub>2</sub> (1:1, 5 mL), extracted with CH<sub>2</sub>Cl<sub>2</sub> (3 × 8 mL), combined organic layer dried over anhydrous Na<sub>2</sub>SO<sub>4</sub> and concentrated under reduced pressure. The resulting residue was filtered through a pad of silica gel and eluted with hexane:EtOAc (1:2, 100 mL), and concentrated under reduced pressure. The resulting residue was resubjected to the identical amide reduction condition [Ru<sub>3</sub>(CO)<sub>12</sub> (7.2 mg, 11 μmol), TMDSO (0.20 mL, 1.12 mmol), toluene (2.0 mL), 60 °C, 14 h] and the resulting residue was purified by flash column chromatography (silica gel, hexanes:EtOAc 3:1→1:5) to afford amine **9** (44 mg, 57%) and lactam **27** (10 mg, 13%) as yellow foams. **9**: *R<sub>f</sub>* = 0.20 (silica gel, hexanes:EtOAc 1:2); IR (film)  $\nu_{\text{max}}$  2925, 2835, 1599, 1479, 1358, 1261, 1175, 1080, 912, 730 cm<sup>-1</sup>; <sup>1</sup>H NMR (400 MHz, CDCl<sub>3</sub>, 1:1 mixture of diastereoisomers):  $\delta$  7.80 (d, *J* = 8.0 Hz, 2H), 7.34 (d, *J* = 7.8 Hz, 2H), 7.21–7.13 (m, 2H), 6.98 (dd, *J* = 8.3, 1.3 Hz, 1H), 6.88 (d, *J* = 7.4 Hz, 1H), 6.79–6.66 (m, 6H), 6.27 (d, *J* = 15.6 Hz, 1H), 5.44 (d, *J* = 4.8 Hz, 1H), 4.05 (t, *J* = 6.5 Hz, 2H), 3.79 (d, *J* = 1.0 Hz, 3H), 3.72 (d, *J* = 2.5 Hz, 3H), 3.66–3.61 (m, 1H), 3.58 (d, *J* = 3.6 Hz, 3H), 3.54–3.43 (m, 1H), 3.10 (dd, *J* = 16.0, 7.2 Hz, 1H), 2.89 (dd, *J* = 16.0, 5.7 Hz, 1H), 2.44 (s, 3H), 2.21–2.05 (m, 2H), 2.01–1.90 (m, 1H), 1.77 (s, 1H), 1.60–1.42 (m, 5H), 1.11–0.83 ppm (m, 1H); <sup>13</sup>C NMR (400 MHz, CDCl<sub>3</sub>, 1:1 mixture of diastereoisomers):  $\delta$  159.5, 158.1, 158.1, 157.3, 148.2, 148.2, 144.7, 143.5, 143.5, 141.3, 141.2, 139.5, 139.2, 138.3, 138.0, 135.1, 135.0, 133.2, 132.9, 132.8, 129.9, 129.7, 129.5, 129.0, 128.9, 128.8, 128.5, 127.9, 124.7, 124.7, 119.3, 117.8, 117.7, 114.6, 114.5, 113.3, 111.9, 110.6, 109.5, 77.3, 68.8, 66.5, 55.3, 55.2, 55.1, 55.1, 45.4, 35.6, 35.6, 35.2, 35.1, 31.7, 31.6, 30.2, 29.9, 29.3, 29.3, 28.7, 28.6, 21.6 ppm; HRMS calcd. For C<sub>42</sub>H<sub>46</sub>NO<sub>6</sub>S<sup>+</sup> [M + H]<sup>+</sup> 692.3040, found 692.3044.

## Macrocycle 2/2a

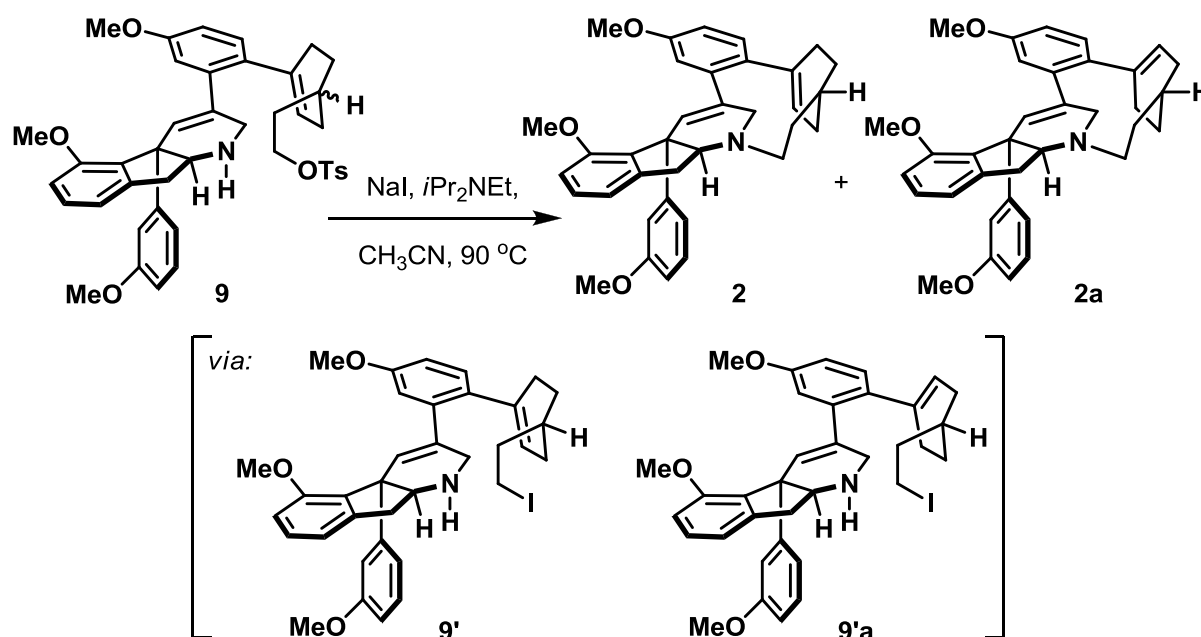

To a stirred solution of amino tosylate **9** (0.27 g, 0.39 mmol) in CH<sub>3</sub>CN (200 mL) at room temperature was added NaI (0.58 mg, 3.9 mmol) and *i*Pr<sub>2</sub>NEt (0.68 mL, 3.9 mmol). The resulting mixture was evacuated and filled with argon (3 ×) before it was placed into a pre-heated (90 °C) oil bath and stirred for 16 h. The resulting mixture was cooled to room temperature and concentrated under reduced pressure, and the resulting residue was diluted with H<sub>2</sub>O (15 mL), extracted with CH<sub>2</sub>Cl<sub>2</sub> (3 × 10 mL), combined organic layer dried over anhydrous Na<sub>2</sub>SO<sub>4</sub> and concentrated under reduced pressure. The resulting residue was purified by flash column chromatography (silica gel, hexanes:EtOAc 10:1→1:3) to afford: fraction A: macrocycle **2/2a** (**2:2a** ~ 1:0.36, 120 mg, 59%); fraction B: macrocycle **2/2a** and iodide **9'/9'a** (43.0 mg); and fraction C: iodide **9'/9'a** (37.0 mg, 14%) as yellow amorphous solids. The mixture of macrocycle **2/2a** and iodide **9'/9'a** (fractions B and C) was resubjected under the identical macrocyclization condition (with the exclusion of NaI) followed by chromatographic purification to afford additional macrocycle **2/2a** (55.0 mg, 27%). [Alternatively, macrocyclization could be carried out with continuous heating without the isolation of iodide intermediates to afford macrocycle **2/2a** with similar result]. **2/2a**: *R*<sub>f</sub> = 0.43 (silica gel, hexanes:EtOAc 1:1); IR (film)  $\nu_{\text{max}}$  2921, 2852, 1599, 1478, 1464, 1377, 1288, 1262, 1122, 874 cm<sup>-1</sup>; <sup>1</sup>H NMR (400 MHz, CDCl<sub>3</sub>, 1:1 mixture of diastereoisomers):  $\delta$  7.24–7.09 (m, 3H), 7.03–6.96 (m, 1H), 6.90–6.84 (m, 2H), 6.83–6.62 (m, 4H), 6.57–6.50 (m,

1H), 5.86 (d,  $J = 5.9$  Hz, 0.6H), 5.45 (s, 0.4H), 3.98 (t,  $J = 8.9$  Hz, 1H), 3.83 (s, 1.5H), 3.77–3.69 (m, 6H), 3.62 (s, 1.5H), 3.45 (s, 3H), 3.34–3.24 (m, 2H), 3.24–3.09 (m, 1H), 3.02–2.83 (m, 1H), 2.60–2.46 (m, 1H), 2.45–2.20 (m, 2H), 2.16–1.95 (m, 2H), 1.91–1.71 (m, 2H), 1.15–0.99 ppm (m, 1H);  $^{13}\text{C}$  NMR (101 MHz,  $\text{CDCl}_3$ , 1:1 mixture of diastereoisomers):  $\delta$  159.6, 159.2, 158.1, 156.7, 156.3, 153.1, 144.5, 143.5, 142.9, 139.0, 136.1, 135.5, 135.2, 135.1, 132.9, 131.7, 130.1, 129.1, 129.0, 128.5, 128.4, 127.6, 119.4, 119.3, 117.0, 116.5, 115.1, 113.2, 112.7, 111.9, 111.7, 110.7, 110.4, 109.8, 109.4, 74.7, 74.6, 58.0, 55.4, 55.2, 55.0, 52.7, 51.2, 50.0, 45.8, 43.3, 35.9, 35.2, 30.0, 29.7, 28.9, 28.4, 26.7, 26.5, 26.3, 26.0. ppm; HRMS calcd. For  $\text{C}_{35}\text{H}_{38}\text{NO}_3^+$   $[\text{M} + \text{H}]^+$  520.2846, found 520.2849.

**Representative  $^1\text{H}$  NMR (400 MHz,  $\text{CDCl}_3$ ) analysis illustrating the rate difference in the formation of macrocycle 2 and 2a after 16 hours at 90 °C: (a) semi-purified reaction mixture containing macrocycle 2/2a and iodide 9'/9'a; (b) macrocycle 2 obtained from preparative thin-layer-chromatography purification; (c) macrocycle 2a obtained from preparative thin-layer-chromatography purification; (d) diastereoisomerically enriched iodide 9'/9'a**

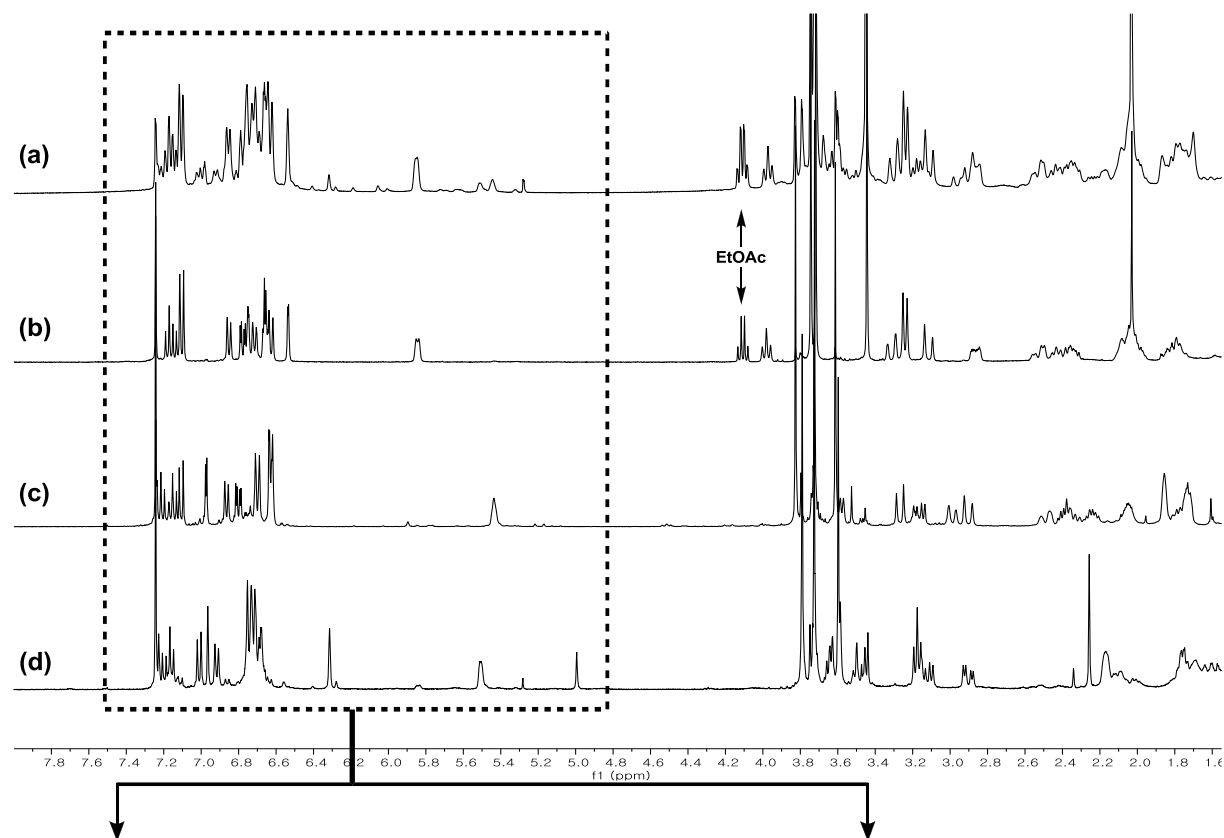

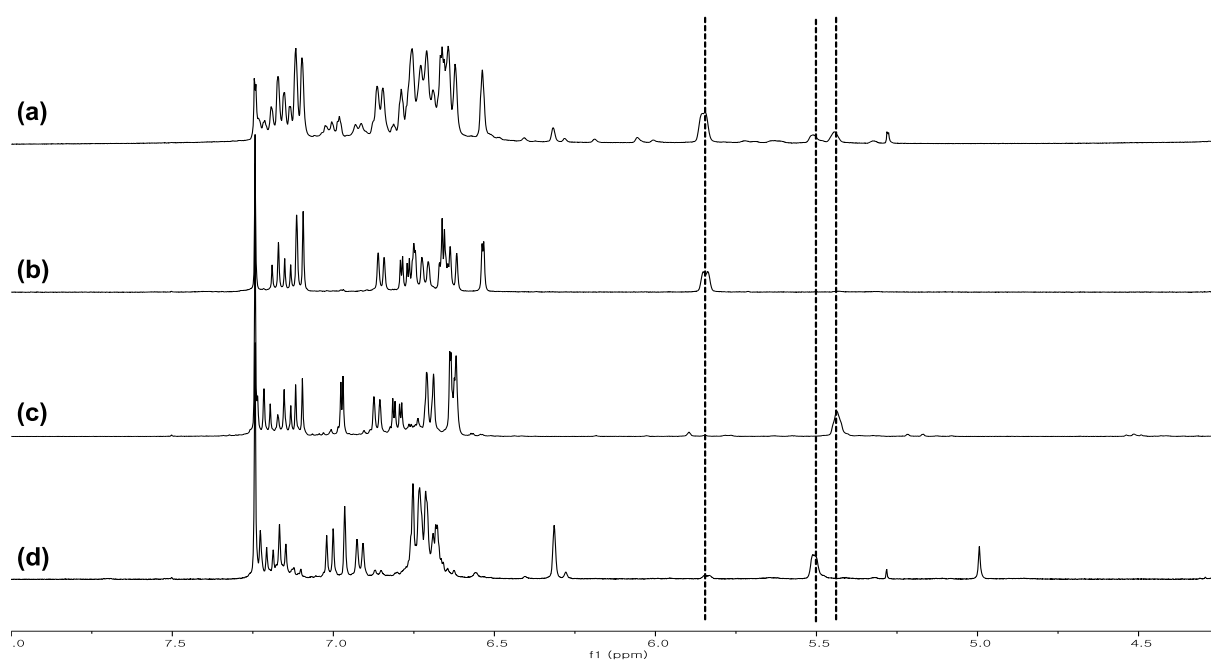

Representative LCMS analysis of macrocycle formation (crude, 90 °C, 16 hours)

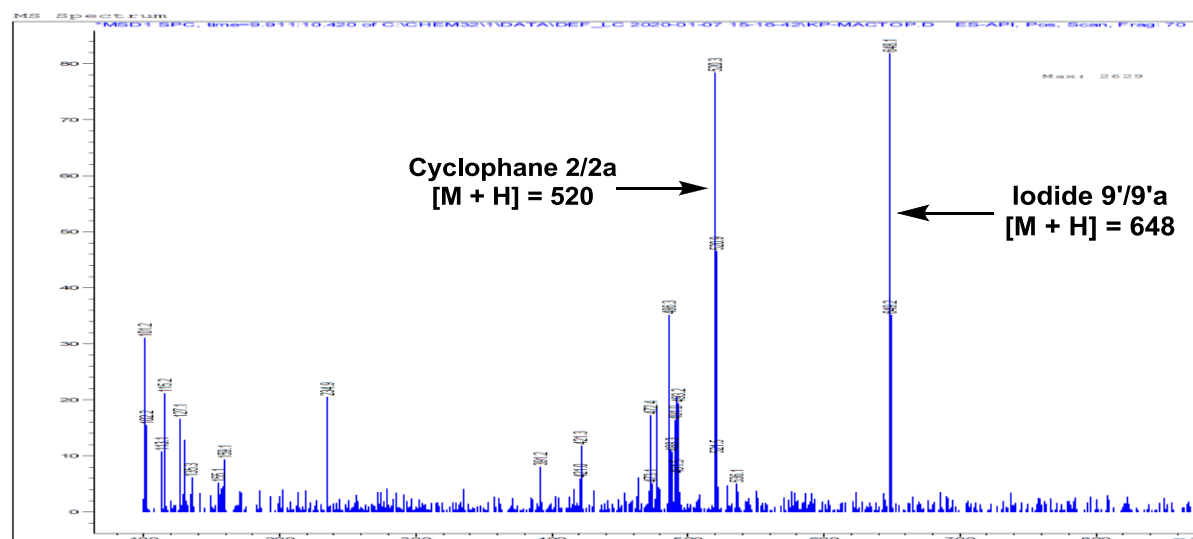

### Boronic Ester 20b

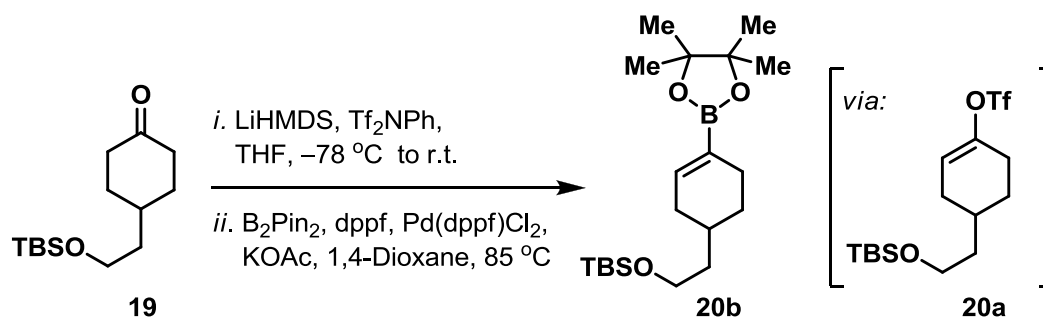

(i) To a stirred solution of ketone **19**<sup>[4]</sup> (0.69 g, 2.7 mmol) in THF (26.0 mL) at room temperature was added Tf<sub>2</sub>NPh (1.4 g, 4.0 mmol). The resulting mixture was cooled to –78 °C before LiHMDS (1.0 M in THF, 3.8 mL, 3.8 mmol) was added. The resulting mixture was stirred for 45 min then warmed to room temperature and stirred for 1 h before it was diluted with brine (40 mL), extracted with EtOAc (3 × 30 mL), combined organic layer dried over anhydrous Na<sub>2</sub>SO<sub>4</sub> and concentrated under reduced pressure. The resulting residue was purified by flash column chromatography (silica gel, hexanes:Et<sub>2</sub>O 95:5) to afford triflate **20a** (0.99 g, 96%) as a yellow oil. **20a**: *R*<sub>f</sub> = 0.75 (silica gel, hexanes:EtOAc 6:1); IR (film) *v*<sub>max</sub> 2930, 1417, 1205, 834, 765 cm<sup>-1</sup>; <sup>1</sup>H NMR (400 MHz, CDCl<sub>3</sub>): δ 5.70 (br s, 1H), 3.65 (t, *J* = 6.4 Hz, 2H), 2.46–2.20 (m, 3H), 1.95–1.81 (m, 2H), 1.80–1.69 (m, 1H), 1.56–1.38 (m, 3H), 0.87 (s, 9H), 0.03 ppm (s, 6H); <sup>13</sup>C NMR (101 MHz, CDCl<sub>3</sub>): δ 149.1, 117.7, 60.9, 37.9, 30.3, 30.1, 29.1, 28.5, 27.1, 25.9, 18.3, –5.4 ppm; HRMS calcd. For C<sub>15</sub>H<sub>27</sub>F<sub>3</sub>O<sub>4</sub>SSiNa<sup>+</sup> [*M* + Na]<sup>+</sup> 411.1244, found 411.1247.

(ii) To a stirred solution of triflate **20a** (0.99 g, 2.6 mmol) in 1,4-dioxane (12.8 mL) at room temperature was added B<sub>2</sub>Pin<sub>2</sub> (0.71 g, 2.8 mmol), dppf (0.14 g, 0.25 mmol) and KOAc (0.50 g, 5.1 mmol). The resulting mixture was evacuated and filled with argon (3 ×) before Pd(dppf)Cl<sub>2</sub> (43.1 mg, 59 μmol) was added and placed into a pre-heated (85 °C) oil bath. The resulting mixture was stirred for 16 h before it was cooled to room temperature, filtered through a pad of Celite<sup>®</sup> and eluted with CH<sub>2</sub>Cl<sub>2</sub> (30 mL), and concentrated under reduced pressure. The resulting residue was purified by flash column chromatography (silica gel, hexanes:Et<sub>2</sub>O 10:1) to afford boronic ester **20b** (1.87 g, 67%) as a yellow amorphous solid. **20b**: *R*<sub>f</sub> = 0.67 (silica gel, hexanes: Et<sub>2</sub>O 4:1); IR (film) *v*<sub>max</sub> 2927, 1634, 1387, 1330, 1146, 833, 774 cm<sup>-1</sup>; <sup>1</sup>H NMR (400 MHz, CDCl<sub>3</sub>): δ 6.50 (br s, 1H), 3.63 (t, *J* = 6.7 Hz, 2H), 2.25–2.11 (m, 2H), 2.11–2.01 (m, 1H), 1.81–1.59 (m, 3H), 1.45 (qd, *J* = 6.6, 1.8 Hz, 2H), 1.22 (s, 12H), 1.20–1.06 (m, 1H), 0.85 (s, 9H), –0.01 ppm (s, 6H); <sup>13</sup>C NMR (101 MHz, CDCl<sub>3</sub>): δ 142.2, 82.9, 61.0, 39.6, 33.4, 29.7, 28.8, 26.1, 25.9, 24.8, 24.8, 18.3, –5.3 ppm; HRMS calcd. For C<sub>20</sub>H<sub>39</sub>BO<sub>3</sub>SiNa<sup>+</sup> [*M* + Na]<sup>+</sup> 389.2658, found 389.2656.

## Tosylate **20d**

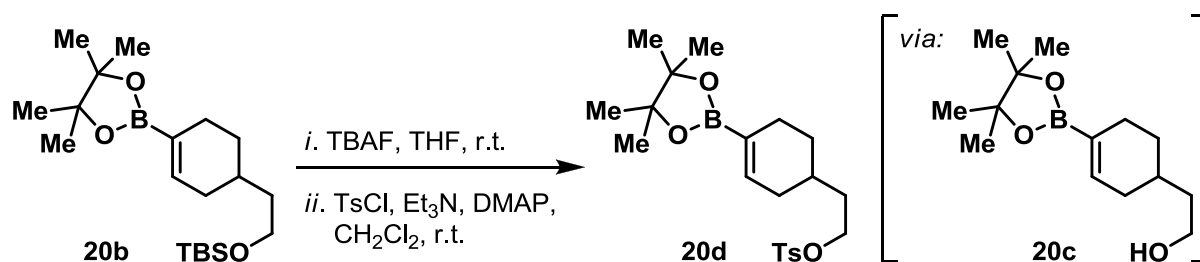

(i) To a stirred solution of TBS ether **20b** (0.29 g, 0.75 mmol) in THF (7.0 mL) at 0 °C was added TBAF (1.0 M in THF, 1.5 mL, 1.5 mmol). The resulting mixture was warmed to room temperature and stirred for 14 h before it was cooled to 0 °C and treated with additional TBAF (1.0 M in THF, 1.5 mL, 1.5 mmol). The resulting mixture was warmed to room temperature and stirred for 6 h before it was quenched with  $\text{NH}_4\text{Cl}$  (5 mL, sat. aq.), extracted with EtOAc ( $3 \times 10$  mL), combined organic layer dried over anhydrous  $\text{Na}_2\text{SO}_4$  and concentrated under reduced pressure. The resulting residue was purified by flash column chromatography (silica gel, hexanes:Et<sub>2</sub>O 10:1→1:1) to afford alcohol **20c** (0.14 g, 74%) as a white amorphous solid. **20c**:  $R_f$  = 0.35 (silica gel, hexanes: Et<sub>2</sub>O 1:1); IR (film)  $\nu_{\text{max}}$  3368, 2978, 2919, 1634, 1387, 1145, 857  $\text{cm}^{-1}$ ;  $^1\text{H}$  NMR (400 MHz,  $\text{CDCl}_3$ ):  $\delta$  6.51 (br s, 1H), 3.69 (t,  $J$  = 6.8 Hz, 2H), 2.27–2.16 (m, 2H), 2.12–2.02 (m, 1H), 1.80–1.65 (m, 3H), 1.53 (qd,  $J$  = 6.7, 4.8 Hz, 2H), 1.33–1.13 (s, 13H), 0.93–0.84 ppm (m, 1H);  $^{13}\text{C}$  NMR (101 MHz,  $\text{CDCl}_3$ ):  $\delta$  141.9, 83.0, 60.8, 39.5, 33.3, 29.7, 28.8, 26.0, 24.8, 24.8 ppm; HRMS calcd. For  $\text{C}_{14}\text{H}_{25}\text{BO}_3\text{Na}^+ [\text{M} + \text{Na}]^+$  275.1792, found 275.1795.

(ii) To a stirred solution of alcohol **20c** (0.12 g, 0.49 mmol) in  $\text{CH}_2\text{Cl}_2$  (5.0 mL) at room temperature was added TsCl (0.18 g, 0.96 mmol), DMAP (11.9 mg, 97  $\mu\text{mol}$ ), and  $\text{Et}_3\text{N}$  (0.27 mL, 1.94 mmol). The resulting mixture was stirred for 12 h before it was diluted with brine (5 mL), extracted with  $\text{CH}_2\text{Cl}_2$  ( $3 \times 8$  mL), combined organic layer dried over anhydrous  $\text{Na}_2\text{SO}_4$  and concentrated under reduced pressure. The resulting residue was purified by flash column chromatography (silica gel, hexanes: Et<sub>2</sub>O 3:1→1:2) to afford tosylate **20d** (0.11 g, 57%) as a yellow amorphous solid. **20d**:  $R_f$  = 0.5 (silica gel, hexanes: Et<sub>2</sub>O 2:1); IR (film)  $\nu_{\text{max}}$  2941, 1663, 1361, 1168, 815, 749  $\text{cm}^{-1}$ ;  $^1\text{H}$  NMR (400 MHz,  $\text{CDCl}_3$ ):  $\delta$  7.77 (d,  $J$  = 7.7 Hz, 2H), 7.32 (d,  $J$  = 7.7 Hz, 2H), 6.44 (br s, 1H), 4.07 (t,  $J$  = 6.2 Hz, 2H), 2.43 (s, 3H), 2.18–1.94 (m, 3H), 1.70–1.53 (m, 5H), 1.27–1.21 (m, 12H), 1.10 ppm (m, 1H);  $^{13}\text{C}$  NMR (101 MHz,

CDCl<sub>3</sub>):  $\delta$  144.7, 141.2, 133.1, 129.8, 127.9, 83.1, 68.6, 35.2, 32.7, 29.3, 28.3, 25.7, 24.8, 24.8, 21.6 ppm; HRMS calcd. For C<sub>21</sub>H<sub>31</sub>BO<sub>5</sub>SNa<sup>+</sup> [M + Na]<sup>+</sup> 429.1881, found 429.1883.

### Aryl Bromide-Boronic Ester 29

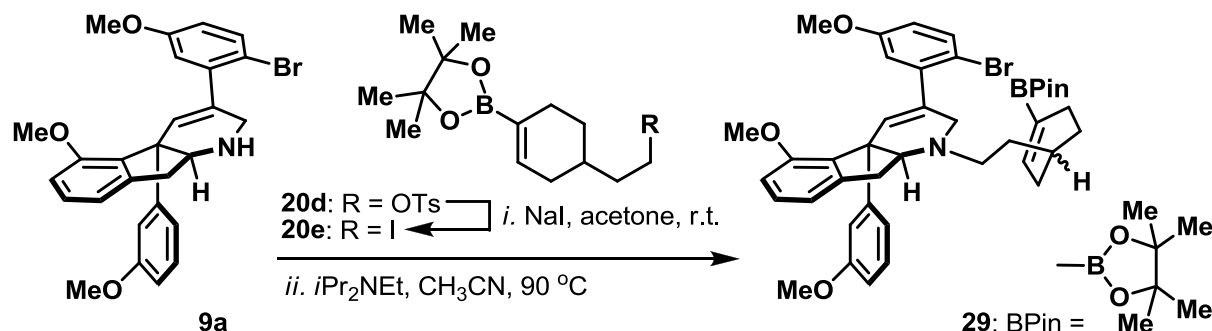

(i) To a stirred solution of tosylate **20d** (36.8 mg, 90.6  $\mu$ mol) in acetone (2.0 mL) at room temperature was added NaI (0.14 g, 0.91 mmol). The resulting mixture was stirred for 12 h before it was concentrated under reduced pressure, diluted with H<sub>2</sub>O (5 mL) and extracted with Et<sub>2</sub>O (3  $\times$  5 mL), combined organic layer dried over anhydrous Na<sub>2</sub>SO<sub>4</sub> and concentrated under reduced pressure. Crude iodide **20e** which was used directly in the subsequent reaction.

### Representative <sup>1</sup>H NMR (400 MHz, CDCl<sub>3</sub>, crude) of iodide 20e

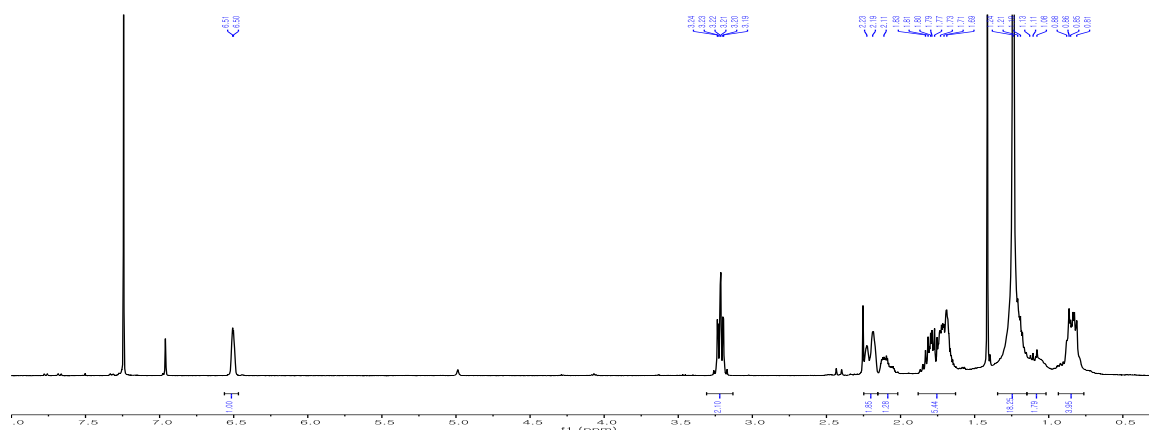

(ii) To a stirred solution of amine **9a**<sup>[6]</sup> (60.0 mg, 0.12 mmol) and iodide **20e** (43.0 mg, 0.12 mmol) in CH<sub>3</sub>CN (1.5 mL) at room temperature was added *i*Pr<sub>2</sub>NEt (0.16 mL, 0.92 mmol). The resulting mixture was evacuated and filled with argon (3  $\times$ ) before it was placed into a pre-heated (90 °C) oil bath and stirred for 36 h. The resulting mixture was cooled to room temperature, concentrated under reduced pressure, diluted with H<sub>2</sub>O (3 mL) and extracted with CH<sub>2</sub>Cl<sub>2</sub> (3  $\times$  3 mL), combined organic layer dried over anhydrous Na<sub>2</sub>SO<sub>4</sub> and

concentrated under reduced pressure. The resulting residue was purified by flash column chromatography (silica gel, hexanes:EtOAc 8:1→1:2) to afford aryl bromide-boronic ester **29** (48.0 mg, 73% over two steps) as a brown foam. **29**:  $R_f$  = 0.50 (silica gel, hexanes:EtOAc 1:1); IR (film)  $\nu_{\max}$  2976, 2928, 2836, 1633, 1588, 1479, 1387, 1289, 1145  $\text{cm}^{-1}$ ;  $^1\text{H}$  NMR (400 MHz,  $\text{CDCl}_3$ , 1:1 mixture of diastereoisomers):  $\delta$  7.40 (d,  $J$  = 8.7 Hz, 1H), 7.19 (t,  $J$  = 7.9 Hz, 1H), 7.13 (t,  $J$  = 7.9 Hz, 1H), 7.02 (s, 1H), 6.92–6.85 (m, 2H), 6.77–6.64 (m, 4H), 6.48 (s, 0.5H), 6.41 (s, 0.5H), 5.92 (d,  $J$  = 3.0 Hz, 1H), 3.75 (d,  $J$  = 1.7 Hz, 6H), 3.69 (t,  $J$  = 8.6 Hz, 1H), 3.55–3.44 (m, 4H), 3.33 (d,  $J$  = 16.8 Hz, 1H), 3.15 (dd,  $J$  = 15.4, 9.5 Hz, 1H), 2.82 (dd,  $J$  = 15.3, 7.7 Hz, 1H), 2.57 (t,  $J$  = 6.9 Hz, 2H), 2.20–2.07 (m, 1H), 2.07–1.96 (m, 1H), 1.94–1.82 (m, 1H), 1.69–1.59 (m, 2H), 1.58–1.40 (m, 2H), 1.33 (t,  $J$  = 6.7 Hz, 1H), 1.27–1.21 (m, 12H), 1.14–0.93 ppm (m, 1H);  $^{13}\text{C}$  NMR (101 MHz,  $\text{CDCl}_3$ , 1:1 mixture of diastereoisomers):  $\delta$  159.0, 158.7, 156.3, 148.9, 148.9, 143.4, 143.3, 142.6, 142.3, 136.9, 133.2, 132.8, 132.8, 128.6, 128.2, 128.1, 127.8, 119.6, 119.5, 117.8, 116.4, 116.3, 114.2, 114.2, 113.3, 113.2, 111.0, 111.0, 109.4, 82.9, 77.2, 70.9, 70.4, 56.2, 55.6, 55.2, 55.2, 55.0, 52.7, 52.4, 50.2, 49.9, 33.9, 33.9, 33.2, 33.2, 30.7, 30.5, 28.9, 27.8, 27.7, 26.2, 26.1, 24.9, 24.8, 24.8 ppm; HRMS calcd. For  $\text{C}_{41}\text{H}_{50}\text{NO}_5^+$   $[\text{M} + \text{H}]^+$  726.2967, found 726.2963.

**Attempted preparation of macrocycle 2/2a via intramolecular Suzuki reaction of 29:**

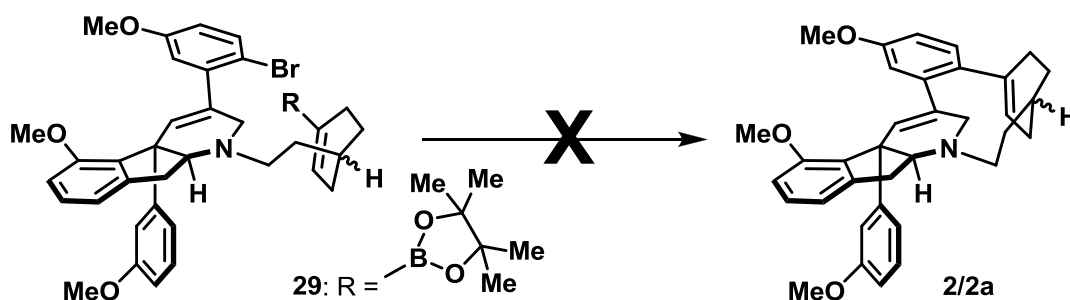

*Representative procedure:* To a stirred solution of aryl bromide-boronic ester **29** (19.0 mg, 26  $\mu\text{mol}$ ) in  $\text{CH}_3\text{CN}/\text{H}_2\text{O}$  (1:1, 3.0 mL) at room temperature was added  $\text{K}_2\text{CO}_3$  (7.23 mg, 52  $\mu\text{mol}$ ) and  $\text{Pd}(\text{dppf})\text{Cl}_2$  (1.90 mg, 2.6  $\mu\text{mol}$ ). The resulting mixture was evacuated and filled with argon ( $3 \times$ ) before it was placed into a pre-heated (90  $^\circ\text{C}$ ) oil bath and stirred for 8 h. The resulting mixture was cooled to room temperature and diluted with  $\text{H}_2\text{O}/\text{CH}_2\text{Cl}_2$  (1:1, 10 mL), extracted with  $\text{CH}_2\text{Cl}_2$  ( $3 \times 10$  mL), combined organic layer dried over anhydrous  $\text{Na}_2\text{SO}_4$  and concentrated under reduced pressure. The resulting residue was filtered through a pad of



silica gel and eluted with hexane:EtOAc 1:2 (25 mL), concentrated under reduced pressure, and the resulting residue was subjected to  $^1\text{H}$  NMR and LCMS analysis.

**Representative  $^1\text{H}$  NMR ( $\text{CDCl}_3$ ) analysis illustrating the outcome of intramolecular Suzuki reaction of substrate 29: (a) aryl bromide-boronic ester 29; (b) semi-purified reaction mixture; (c) macrocycle 2 obtained from preparative thin-layer-chromatography purification; (d) macrocycle 2a obtained from preparative thin-layer-chromatography purification**

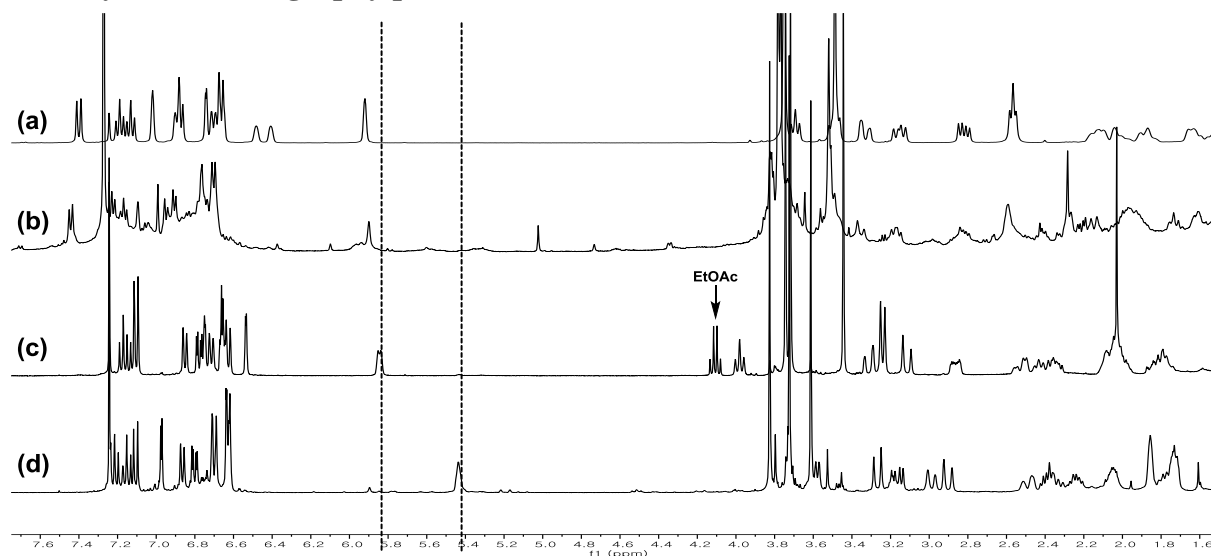

**Representative LCMS analysis of attempted intramolecular Suzuki reaction of substrate 29 (Speculated components by LCMS, macrocycle 2/2a was not detected):**

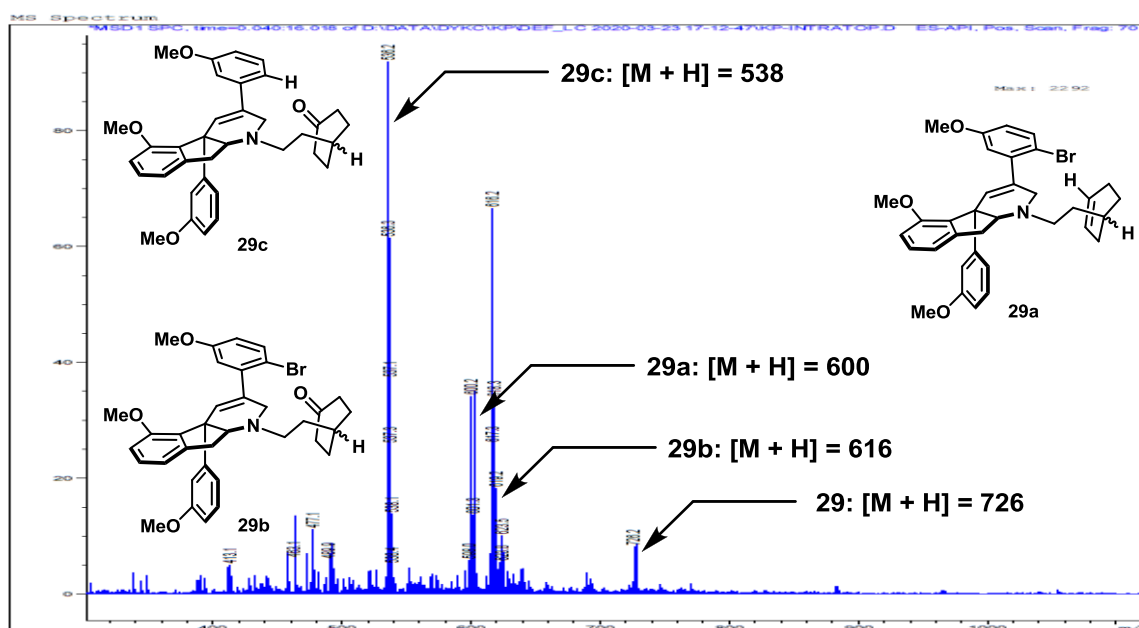

## Intermolecular Suzuki Product 29a

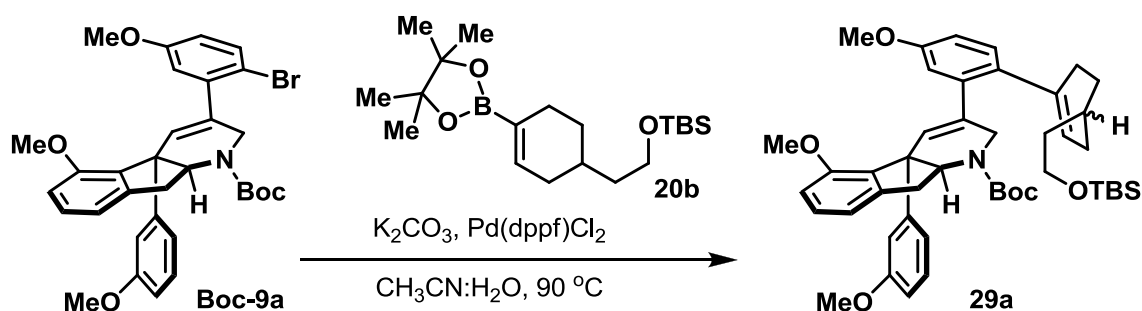

To a stirred solution of aryl bromide **Boc-9a** (0.45 g, 0.76 mmol) in  $CH_3CN/H_2O$  (1:1, 8.0 mL) at room temperature was added  $K_2CO_3$  (0.21 g, 1.53 mmol) and  $Pd(dppf)Cl_2$  (55.8 mg, 76  $\mu$ mol). The resulting mixture was evacuated and filled with argon ( $3 \times$ ) before it was placed into a pre-heated ( $90\text{ }^\circ C$ ) oil bath and stirred for 14 h. The resulting mixture was cooled to room temperature and diluted with  $H_2O/CH_2Cl_2$  (1:1, 15 mL), extracted with  $CH_2Cl_2$  ( $3 \times 10$  mL), combined organic layer dried over anhydrous  $Na_2SO_4$  and concentrated under reduced pressure. The resulting residue was purified by flash column chromatography (silica gel, hexanes:EtOAc 8:1 $\rightarrow$ 1:2) to afford biaryl **29a** (0.43 g, 75%) as a brown foam.

**29a**:  $^1H$  NMR (400 MHz,  $CDCl_3$ , 1:1 mixture of diastereoisomers):  $^1H$  NMR (400 MHz,  $CDCl_3$ ):  $\delta$  7.30–7.11 (m, 2H), 7.02 (d,  $J = 8.4$  Hz, 1H), 6.88 (d,  $J = 7.3$  Hz, 1H), 6.86–6.65 (m, 6H), 5.93 (s, 0.5H), 5.88 (s, 0.5H), 5.46 (s, 0.5H), 5.43 (s, 0.5H), 5.10–4.75 (m, 2H), 3.80 (s, 3H), 3.73 (s, 3H), 3.72–3.63 (m, 2H), 3.51 (s, 3H), 3.23–2.91 (m, 2H), 2.28–1.97 (m, 3H), 1.68–1.32 (m, 7H), 1.13 (s, 8H), 0.93 (s, 10H), 0.09 ppm (s, 6H);  $^{13}C$  NMR (101 MHz,  $CDCl_3$ , 1:1 mixture of diastereoisomers):  $\delta$  159.4, 158.1, 158.0, 156.2, 154.7, 154.6, 147.8, 142.4, 139.8, 139.6, 138.0, 137.6, 136.3, 135.9, 135.8, 132.0, 129.9, 129.6, 129.0, 128.6, 126.4, 126.0, 125.6, 125.5, 119.2, 117.5, 117.4, 114.9, 112.7, 112.6, 112.5, 112.4, 111.1, 111.0, 109.8, 79.4, 77.3, 63.2, 61.5, 61.4, 55.4, 55.3, 55.2, 55.1, 55.0, 55.0, 42.0, 41.8, 39.6, 39.5, 33.1, 33.0, 32.2, 32.1, 30.7, 30.6, 29.7, 29.6, 28.9, 28.4, 27.9, 26.0, 18.4,  $-5.2$ ,  $-5.2$  ppm.

## Enones **3** and **3a**

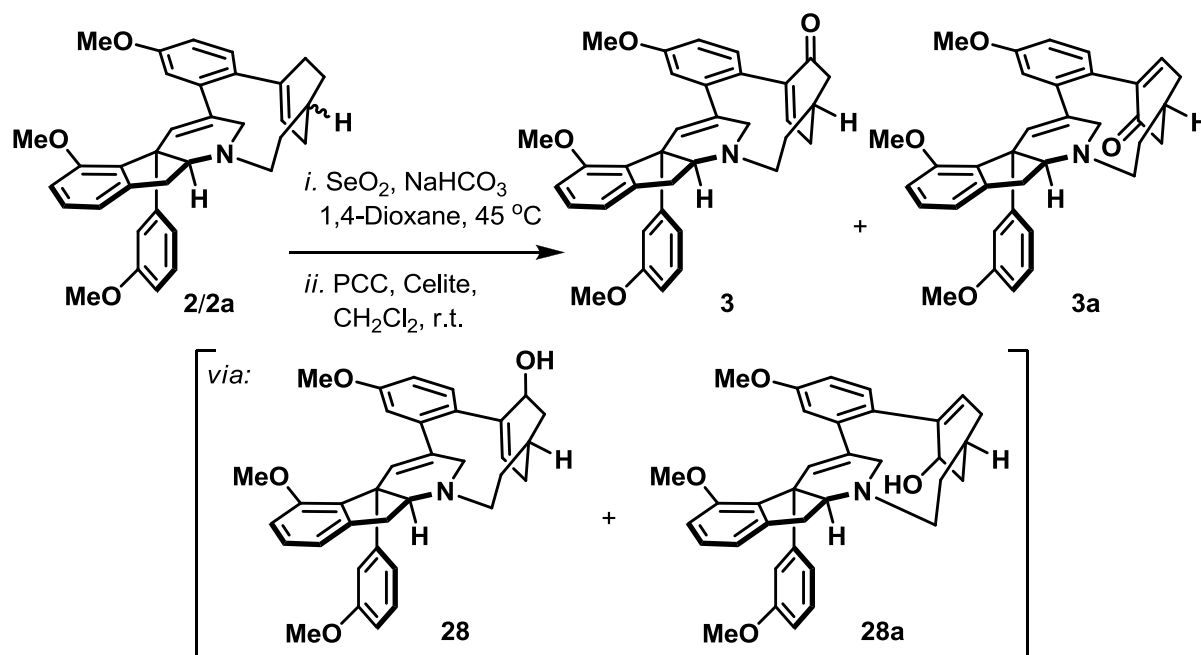

(i) To a stirred solution of macrocycle **2/2a** (**2:2a** ~ 2:1, 15.0 mg, 29  $\mu\text{mol}$ ) in 1,4-dioxane (1.0 mL) at room temperature was added  $\text{SeO}_2$  (5.7 mg, 52  $\mu\text{mol}$ ) and  $\text{NaHCO}_3$  (12.1 mg, 0.14 mmol). The resulting mixture was evacuated and filled with argon ( $3 \times$ ) before it was placed into a pre-heated ( $45\text{ }^\circ\text{C}$ ) oil bath and stirred for 5 h. The resulting mixture was cooled to room temperature before it was quenched with  $\text{NaHCO}_3$  (3 mL, sat. aq.), extracted with  $\text{CH}_2\text{Cl}_2$  ( $3 \times 3\text{ mL}$ ), combined organic layer dried over anhydrous  $\text{Na}_2\text{SO}_4$  and concentrated under reduced pressure. The resulting residue was purified by flash column chromatography (silica gel, hexanes:EtOAc 3:1 $\rightarrow$ 1:6) to afford allylic alcohol **28/28a** (10.6 mg, 69%) as a brown foam. [Note: a “diastereoisomerically enriched” mixture of **2** and **2a** was used for  $\text{SeO}_2$ -mediated allylic oxidation and conversion to enones **3** and **3a** to facilitate assignment of  $^1\text{H}$  NMR signals correspond to allylic alcohols **28** and **28a**, and macrocycle **2** and **2a**, based on the ratio of enone **3** and **3a** obtained]. **28/28a**:  $R_f = 0.15$  (silica gel, hexanes:EtOAc 1:2); IR (film)  $\nu_{\text{max}}$  3414, 2926, 2853, 1601, 1479, 1262, 1082, 1043  $\text{cm}^{-1}$ ;  $^1\text{H}$  NMR (400 MHz,  $\text{CDCl}_3$ , ca. 2:1 mixture of diastereoisomers):  $\delta$  7.57 (d,  $J = 8.5\text{ Hz}$ , 0.3H), 7.51 (d,  $J = 8.5\text{ Hz}$ , 0.7H), 7.23–7.07 (m, 3H), 6.86 (dd,  $J = 7.6, 3.4\text{ Hz}$ , 1H), 6.79 (ddt,  $J = 11.4, 8.4, 3.0\text{ Hz}$ , 1H), 6.75–6.57 (m, 4H), 6.54 (d,  $J = 2.2\text{ Hz}$ , 1H), 5.99 (d,  $J = 6.6\text{ Hz}$ , 0.7H), 5.60 (d,  $J = 6.5\text{ Hz}$ , 0.3H), 4.72 (t,  $J = 7.9\text{ Hz}$ , 0.7H), 4.66 (t,  $J = 7.9\text{ Hz}$ , 0.3H), 3.97 (t,  $J = 8.8\text{ Hz}$ , 0.7H), 3.91 (t,  $J = 8.8\text{ Hz}$ , 0.3H), 3.83 (d,  $J = 2.0\text{ Hz}$ , 2H), 3.79–3.67 (m, 6H), 3.60 (d,  $J = 10.7\text{ Hz}$ , 2H),

3.52 (s, 1H), 3.44 (s, 2H), 3.43–3.31 (m, 1H), 3.31–3.15 (m, 1H), 3.15–3.00 (m, 1H), 2.98–2.86 (m, 1H), 2.50–2.17 (m, 2H), 2.17–1.94 (m, 2H), 1.77 (td,  $J = 9.3, 4.4$  Hz, 0.7H), 1.67 (td,  $J = 9.3, 4.4$  Hz, 0.3H), 1.08 ppm (d,  $J = 16.2$  Hz, 1H);  $^{13}\text{C}$  NMR (126 MHz,  $\text{CDCl}_3$ , *ca.* 2:1 mixture of diastereoisomers):  $\delta$  159.7, 159.5, 159.3, 158.9, 158.4, 156.5, 156.4, 152.2, 151.9, 144.0, 143.9, 143.4, 142.3, 137.5, 137.2, 135.6, 135.4, 134.7, 133.6, 133.5, 132.5, 132.3, 131.0, 130.9, 130.3, 129.9, 129.5, 129.4, 129.0, 128.7, 128.4, 128.3, 119.3, 118.7, 117.1, 116.8, 116.7, 116.5, 115.7, 115.5, 113.3, 112.9, 112.1, 111.6, 111.0, 110.4, 109.9, 109.6, 74.0, 73.6, 68.6, 68.4, 57.5, 55.4, 55.2, 55.0, 52.8, 51.7, 50.8, 49.8, 45.5, 43.3, 41.2, 41.0, 36.5, 36.0, 35.1, 34.5, 29.8, 29.0, 28.6, 27.2, 26.5 ppm; HRMS calcd. For  $\text{C}_{35}\text{H}_{38}\text{NO}_4^+ [\text{M} + \text{H}]^+$  536.2795, found 536.2800.

#### Representative LCMS analysis of $\text{SeO}_2$ -mediated allylic oxidation at 100 °C for 4 h

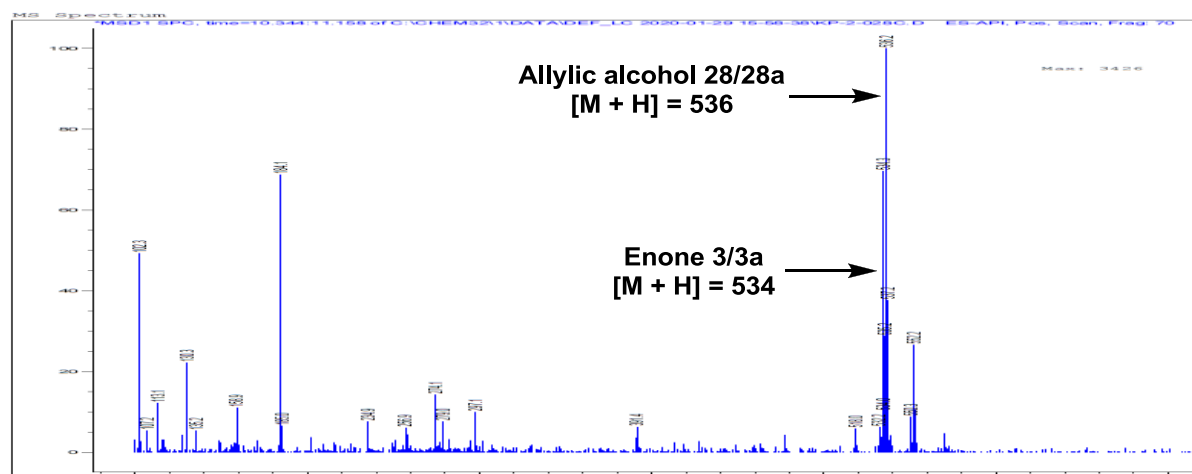

(ii) To a stirred solution of allylic alcohol **28/28a** (15.7 mg, 29  $\mu\text{mol}$ ) in  $\text{CH}_2\text{Cl}_2$  (1.5 mL) at room temperature was added PCC (12.4 mg, 57  $\mu\text{mol}$ ) and Celite<sup>®</sup> (33 mg). The resulting mixture was stirred for 4 h before it was filtered through a pad of Celite<sup>®</sup> and eluted with  $\text{CH}_2\text{Cl}_2$  (10 mL). The resulting filtrate was diluted with  $\text{NaHCO}_3$  (10 mL, sat. aq.), extracted with  $\text{CH}_2\text{Cl}_2$  ( $3 \times 10$  mL), combined organic layer dried over anhydrous  $\text{Na}_2\text{SO}_4$  and concentrated under reduced pressure. The resulting residue was purified by flash column chromatography (silica gel, hexanes:EtOAc 3:1 $\rightarrow$ 1:4) to afford enone **3** (9.0 mg, 58%) and enone **3a** (4.4 mg, 28%) as yellow amorphous solids. **3**:  $R_f = 0.40$  (silica gel, hexanes:EtOAc 1:2); IR (film)  $\nu_{\text{max}}$  2932, 2836, 1668, 1598, 1478, 1464, 1262, 1081, 1041, 750  $\text{cm}^{-1}$ ;  $^1\text{H}$  NMR (400 MHz,  $\text{CDCl}_3$ ):  $\delta$  7.23–7.11 (m, 4H), 6.85 (d,  $J = 7.8$  Hz, 1H), 6.82 (dd,  $J = 8.4, 3.0$

Hz, 1H), 6.71–6.64 (m, 5H), 6.56 (d,  $J = 1.9$  Hz, 1H), 3.91–3.82 (m, 1H), 3.75 (s, 3H), 3.72 (s, 3H), 3.54 (s, 3H), 3.22 (dd,  $J = 17.2, 6.9$  Hz, 1H), 3.12 (dd,  $J = 17.0, 8.9$  Hz, 1H), 3.02 (d,  $J = 16.1$  Hz, 1H), 2.84 (d,  $J = 16.0$  Hz, 1H), 2.78–2.63 (m, 2H), 2.62–2.39 (m, 5H), 2.13–1.99 (m, 1H), 1.32–1.15 ppm (m, 1H);  $^{13}\text{C}$  NMR (101 MHz,  $\text{CDCl}_3$ ):  $\delta$  198.7, 159.4, 158.8, 156.5, 152.4, 149.4, 144.1, 143.4, 139.4, 136.8, 134.9, 131.3, 131.2, 128.8, 128.7, 126.2, 118.9, 116.9, 114.8, 112.8, 111.8, 110.2, 109.6, 73.7, 55.3, 55.2, 55.0, 55.0, 50.5, 47.6, 43.1, 33.3, 30.7, 30.0, 27.4 ppm; HRMS calcd. For  $\text{C}_{35}\text{H}_{36}\text{NO}_4^+$  [ $\text{M} + \text{H}$ ] 534.2639, found 534.2643.

[Note:  $^1\text{H}$  NMR of enone **3** in deuterated chloroform: (a)  $\text{K}_2\text{CO}_3$  treated  $\text{CDCl}_3$ ; (b) untreated  $\text{CDCl}_3$ ; (c) untreated  $\text{CDCl}_3$  with 0.5% of  $\text{NH}_4\text{OH}(\text{aq.})$ ]

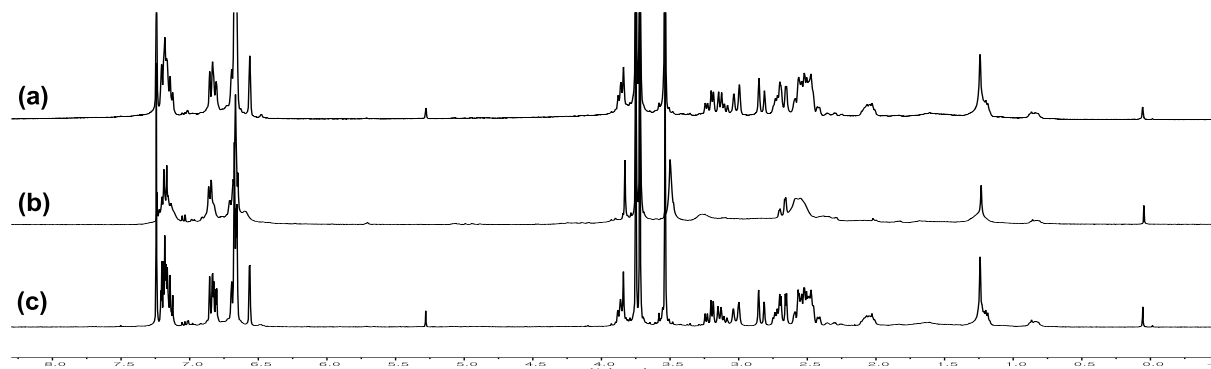

**3a**:  $R_f = 0.50$  (silica gel, hexanes:EtOAc 1:2); IR (film)  $\nu_{\text{max}}$  2936, 2834, 1664, 1598, 1478, 1261, 1082, 1041,  $750\text{ cm}^{-1}$ ;  $^1\text{H}$  NMR (400 MHz,  $\text{CDCl}_3$ ):  $\delta$  7.22 (d,  $J = 7.3$  Hz, 1H), 7.20 (d,  $J = 5.4$  Hz, 1H), 7.15 (t,  $J = 8.2$  Hz, 1H), 7.01 (d,  $J = 2.9$  Hz, 1H), 6.86 (d,  $J = 7.5$  Hz, 1H), 6.84 (dd,  $J = 9.0, 3.0$  Hz, 1H), 6.78–6.73 (m, 1H), 6.72–6.61 (m, 5H), 3.84 (s, 3H), 3.72 (s, 3H), 3.58 (s, 3H), 3.36 (dd,  $J = 7.4, 2.7$  Hz, 1H), 3.26 (dd,  $J = 16.5, 7.5$  Hz, 1H), 3.09 (d,  $J = 14.2$  Hz, 1H), 3.01 (dd,  $J = 16.5, 2.7$  Hz, 1H), 2.78–2.69 (m, 1H), 2.64–2.54 (m, 2H), 2.52–2.45 (m, 2H), 2.36 (q,  $J = 3.4$  Hz, 2H), 2.15 (dt,  $J = 13.0, 4.7$  Hz, 1H), 1.84 (td,  $J = 10.5, 9.5, 4.8$  Hz, 1H), 1.44 ppm (qd,  $J = 11.1, 4.2$  Hz, 1H);  $^{13}\text{C}$  NMR (101 MHz,  $\text{CDCl}_3$ ):  $\delta$  199.0, 195.1, 159.7, 159.6, 158.7, 156.6, 156.2, 152.0, 151.3, 148.7, 144.9, 144.4, 144.0, 143.8, 143.6, 143.4, 141.0, 135.3, 134.5, 133.6, 132.7, 131.7, 131.5, 130.0, 129.2, 129.0, 128.7, 128.5, 128.4, 126.1, 119.2, 118.9, 116.6, 116.4, 114.8, 114.5, 113.1, 111.9, 111.9, 111.4, 110.6, 109.5, 109.4, 75.6, 72.8, 60.3, 55.7, 55.4, 55.2, 55.1, 55.0, 50.1, 49.7, 48.0, 47.3, 42.1, 36.6, 34.0, 33.2, 31.0, 30.8, 30.1, 29.9, 26.7 ppm; HRMS calcd. For  $\text{C}_{35}\text{H}_{36}\text{NO}_4^+$  [ $\text{M} + \text{H}$ ] 534.2639, found 534.2642.

**$^1\text{H}$  NMR comparison between enone 3 synthesized in this work [(a), 400 MHz,  $\text{CDCl}_3$ ] and from Baran and co-workers [(b), 400 MHz,  $\text{CDCl}_3$ ]<sup>[8]</sup>**

**(a)**

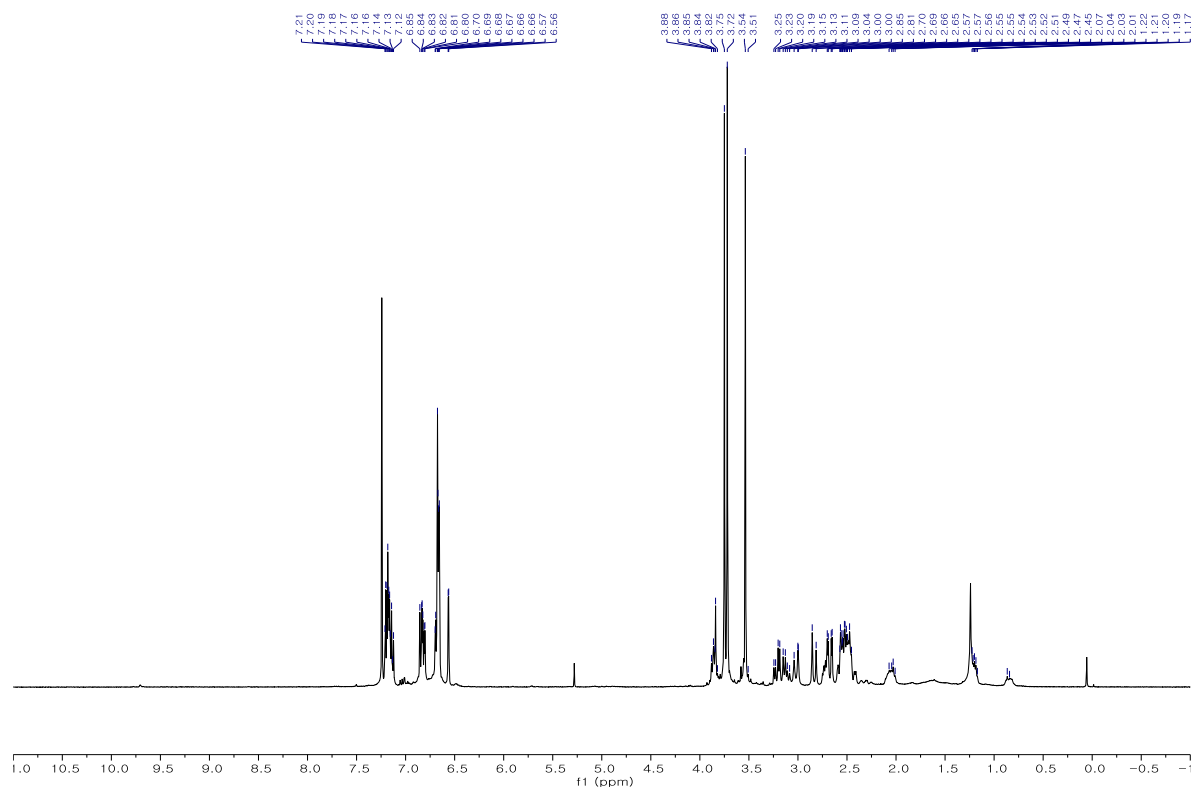

**(b)**

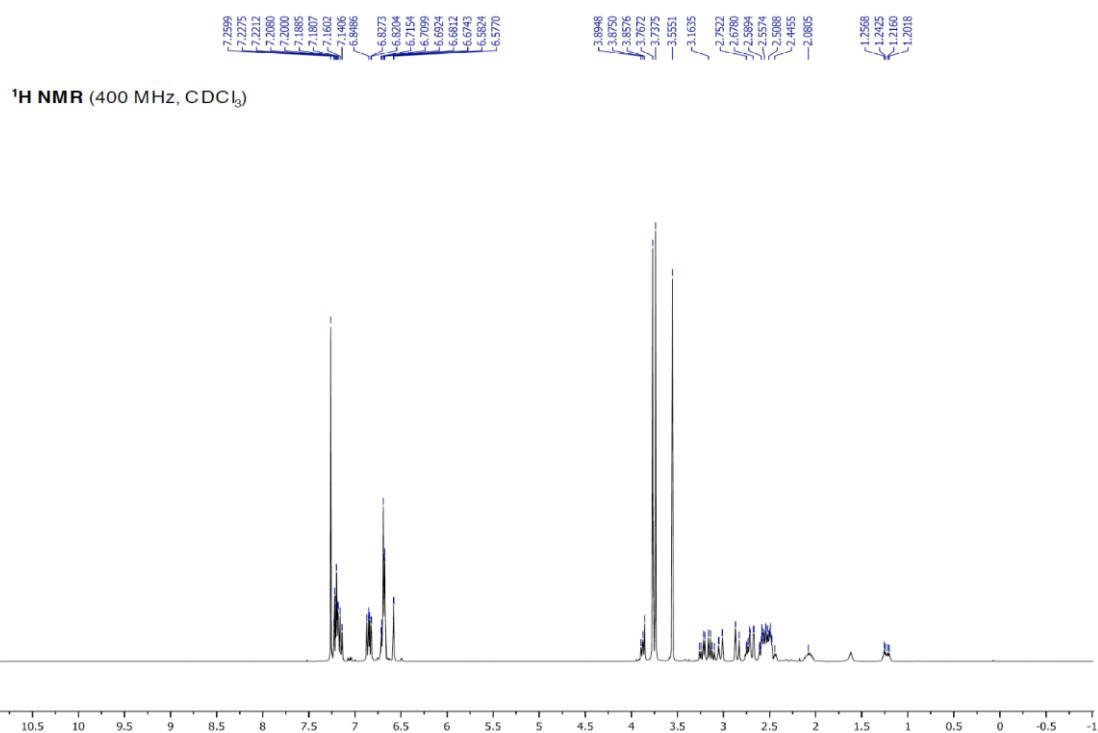

**$^{13}\text{C}$  NMR comparison between enone **3** synthesized in this work [(a), 101 MHz,  $\text{CDCl}_3$ ] and from Baran and co-workers [(b),  $^{13}\text{C}$ -APT, 150 MHz,  $\text{CDCl}_3$ ]<sup>[8]</sup>**

**(a)**

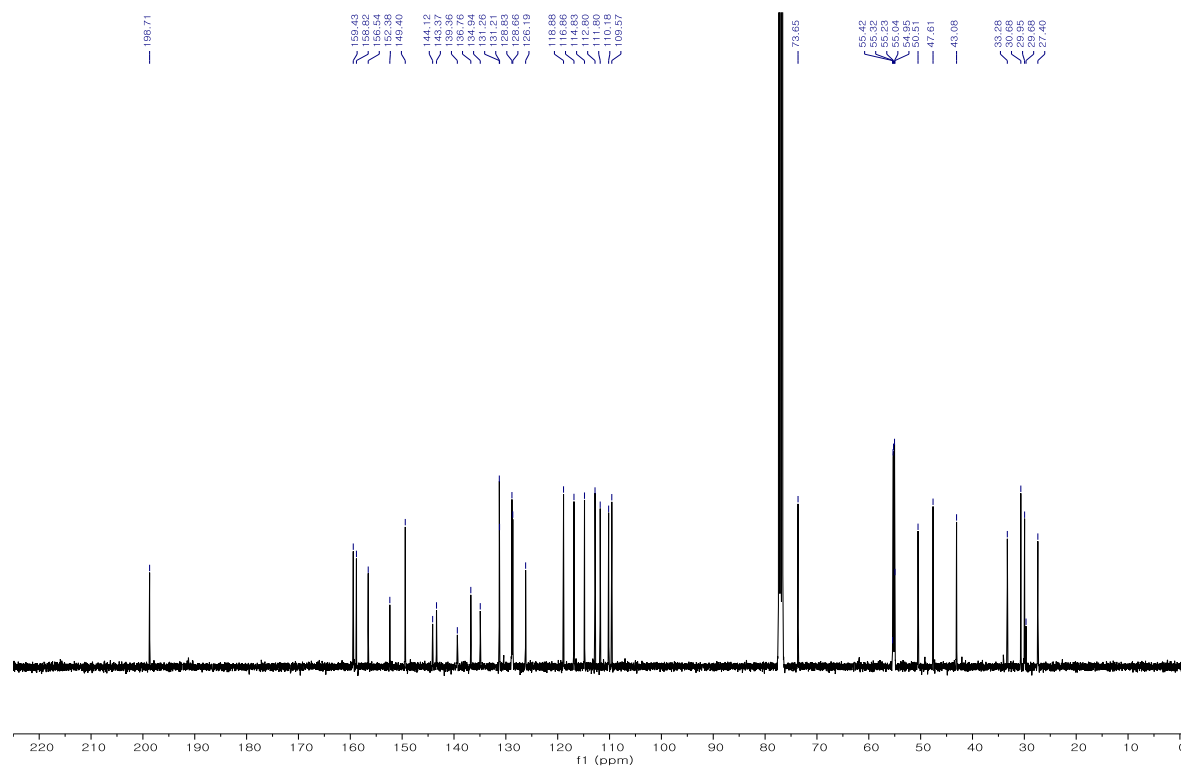

**(b)**

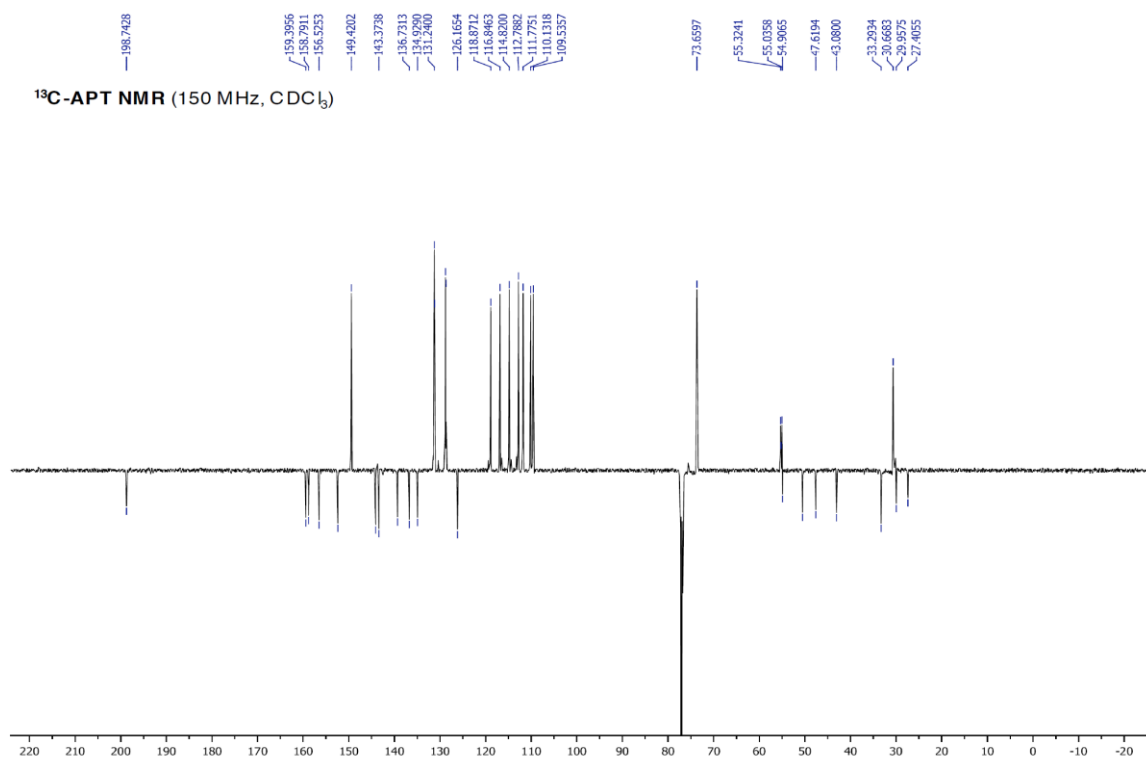

**$^1\text{H}$  NMR comparison between enone 3a synthesized in this work [(a), 400 MHz,  $\text{CDCl}_3$ ] and from Baran and co-workers [(b), 500 MHz,  $\text{CDCl}_3$ ]<sup>[8]</sup>**

**(a)**

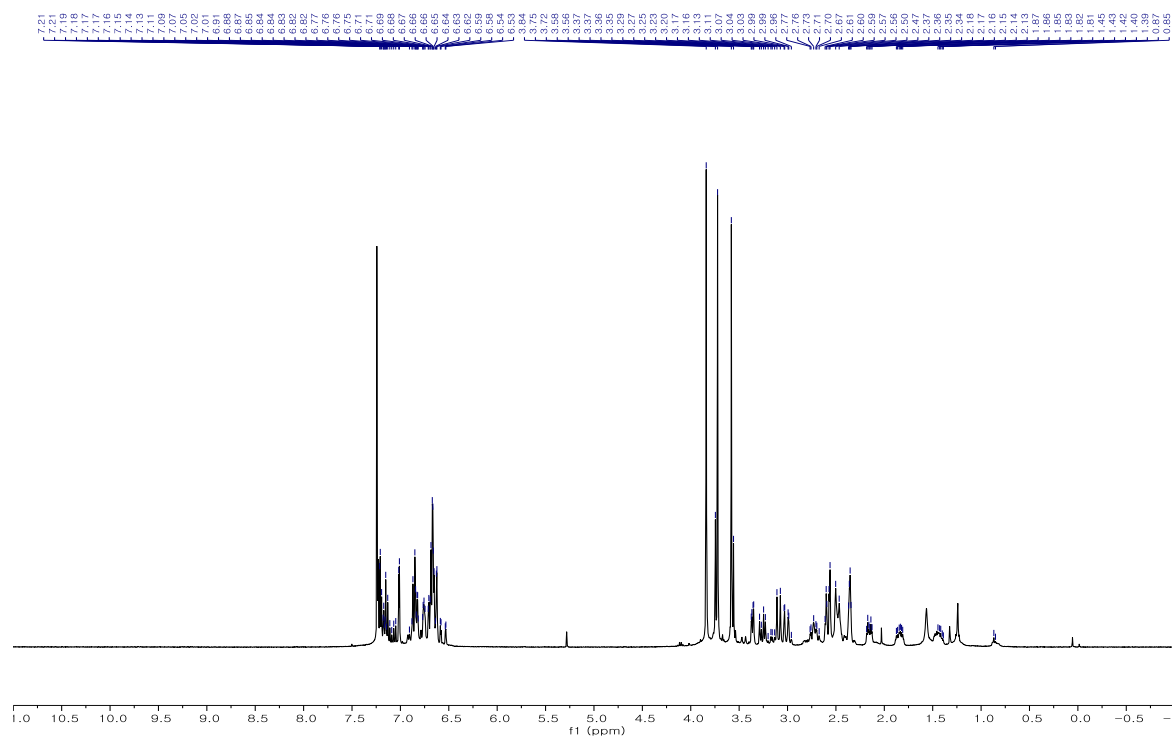

**(b)**

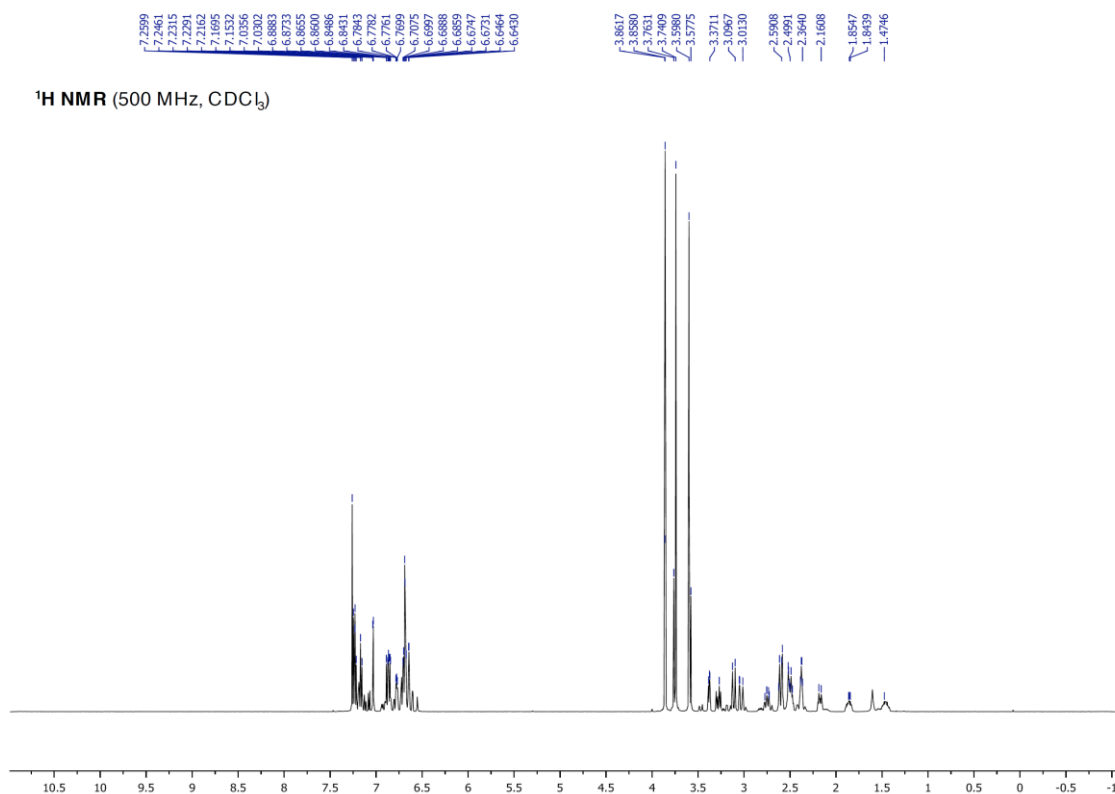



**$^{13}\text{C}$  NMR comparison between enone 3a synthesized in this work [(a), 101 MHz,  $\text{CDCl}_3$ ] and from Baran and co-workers [(b), 125 MHz,  $\text{CDCl}_3$ ]<sup>[8]</sup>**

**(a)**

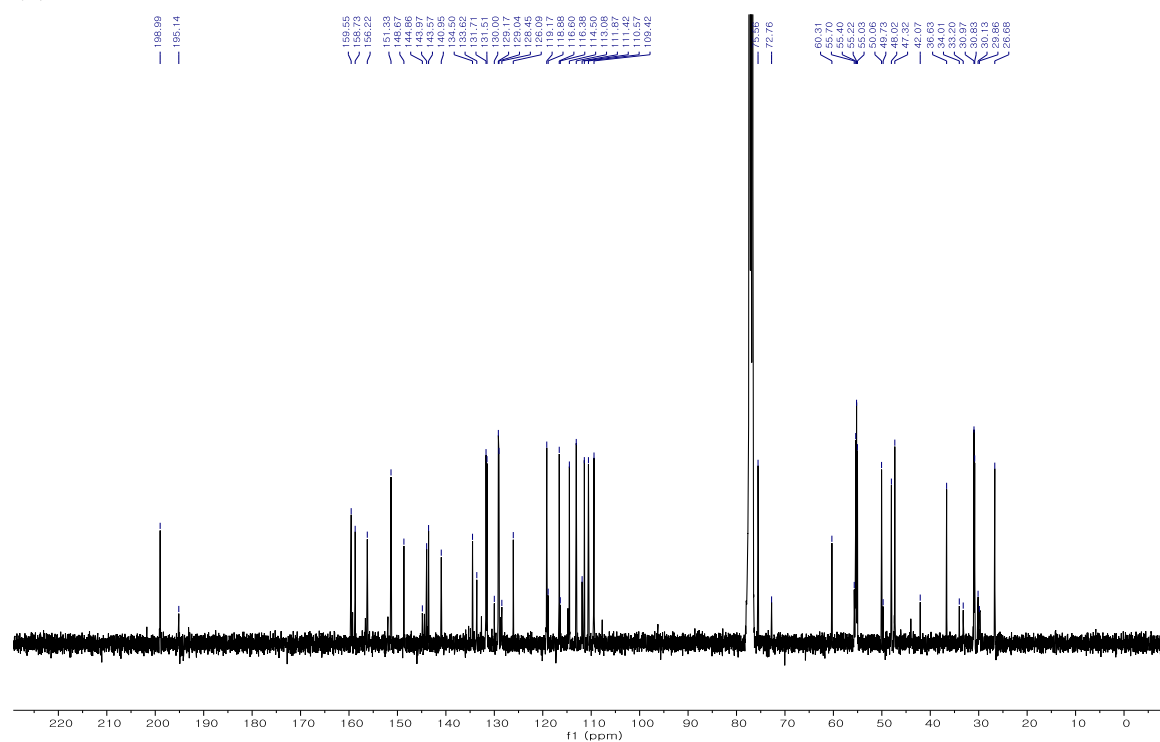

**(b)**

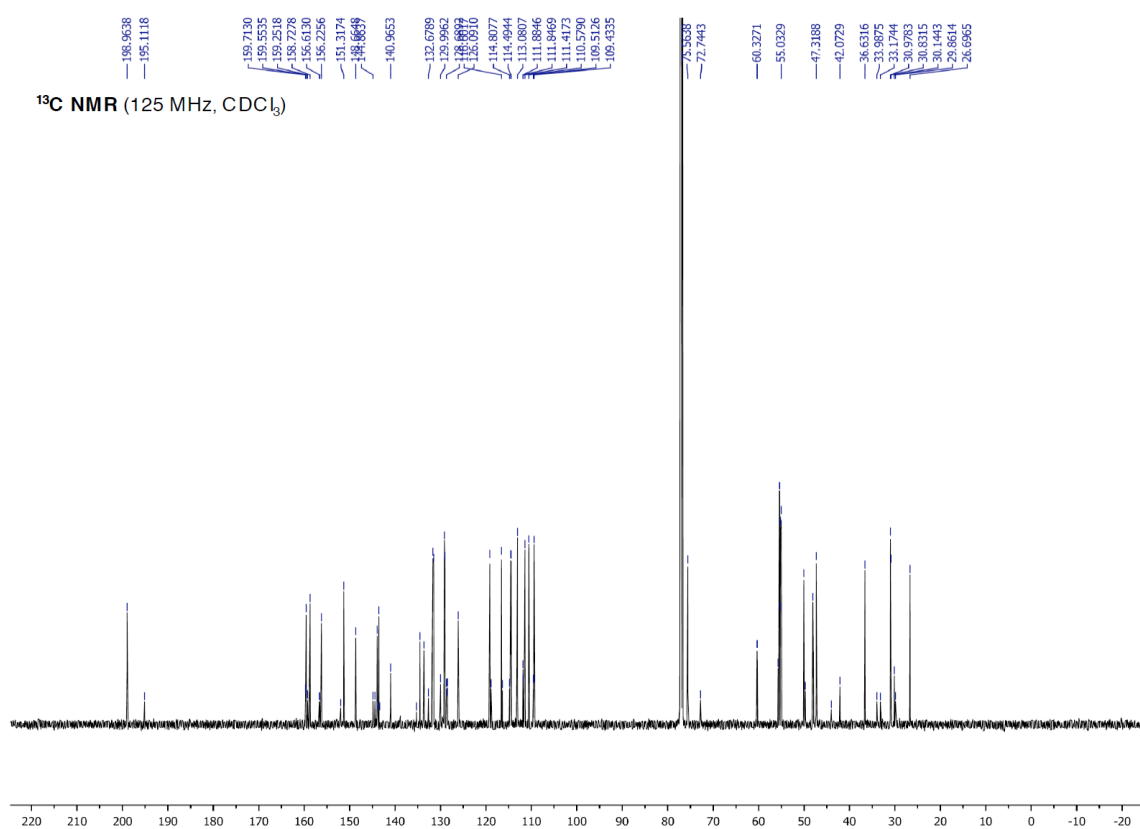

**SeO<sub>2</sub>-mediated allylic oxidation of bicyclic alkene model substrate **22a**:**

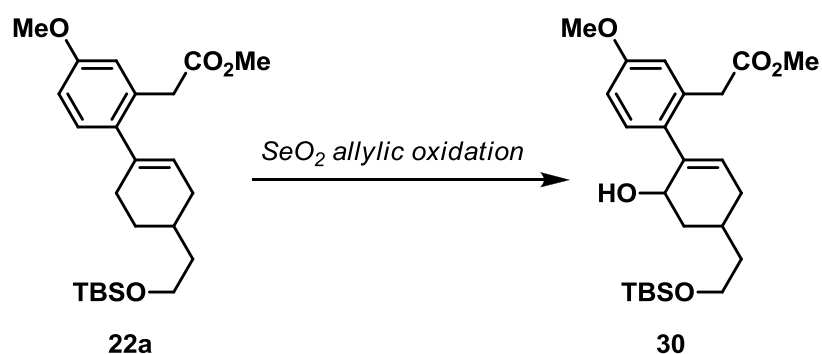

Bicyclic alkene model substrate **22a** [prepared from carboxylic acid **8**: MeI (2.0 equiv), K<sub>2</sub>CO<sub>3</sub> (3.0 equiv), acetone, 25 °C, 16 h, 79%] was subjected to SeO<sub>2</sub>-mediated allylic oxidation conditions and reaction progress was followed by <sup>1</sup>H NMR analysis.

**Methyl Ester **22a**:** *R<sub>f</sub>* = 0.50 (silica gel, hexanes:Et<sub>2</sub>O 4:1); IR (film)  $\nu_{\text{max}}$  2927, 2806, 1740, 1607, 1463, 1254, 1100, 834, 774 cm<sup>-1</sup>; <sup>1</sup>H NMR (400 MHz, CDCl<sub>3</sub>):  $\delta$  7.02 (d, *J* = 8.3 Hz, 1H), 6.82–6.72 (m, 2H), 5.49 (br s, 1H), 3.77 (s, 3H), 3.72 (t, *J* = 6.7 Hz, 2H), 3.66 (s, 3H), 3.62 (s, 2H), 2.30–2.18 (m, 2H), 2.18–2.09 (m, 1H), 1.91–1.70 (m, 3H), 1.63–1.52 (m, 2H), 1.39 (m, 1H), 0.92 (s, 9H), 0.08 ppm (s, 6H); <sup>13</sup>C NMR (101 MHz, CDCl<sub>3</sub>):  $\delta$  172.3, 158.1, 137.2, 137.1, 132.6, 129.5, 126.2, 115.5, 112.5, 77.4, 77.1, 76.8, 61.2, 55.1, 51.8, 39.3, 38.9, 32.2, 30.7, 29.7, 29.3, 26.0, 18.4, –5.3 ppm; HRMS calcd. For C<sub>24</sub>H<sub>38</sub>O<sub>4</sub>SiNa<sup>+</sup> [*M* + Na]<sup>+</sup> 441.2432, found 441.2435.

**Allylic Alcohol **30**:** *R<sub>f</sub>* = 0.25 (silica gel, hexanes:Et<sub>2</sub>O 4:1); IR (film)  $\nu_{\text{max}}$  3484, 2953, 2857, 1737, 1608, 1501, 1255, 1095, 837, 776 cm<sup>-1</sup>; <sup>1</sup>H NMR (400 MHz, CDCl<sub>3</sub>, *ca.* 3:1 mixture of diastereoisomers):  $\delta$  7.11 (d, *J* = 8.1 Hz, 1H), 6.84–6.71 (m, 2H), 5.70–5.58 (m, 0.7H), 5.53 (br s, 0.3H), 4.46 (br s, 0.3H), 4.32 (s, 0.7H), 3.84–3.75 (m, 3H), 3.77 (s, 2H), 3.74–3.68 (m, 2H), 3.67 (s, 1H), 3.65 (s, 2H), 3.62–3.51 (m, 1H), 2.43–2.14 (m, 1H), 2.08–1.88 (m, 2H), 1.87–1.70 (m, 1H), 1.66–1.42 (m, 2H), 0.89 (s, 9H), 0.05 ppm (s, 6H); <sup>13</sup>C NMR (126 MHz, CDCl<sub>3</sub>, *ca.* 3:1 mixture of diastereoisomers):  $\delta$  173.0, 158.5, 140.7, 138.1, 134.2, 133.6, 132.6, 130.5, 130.1, 128.5, 115.9, 115.7, 112.8, 69.5, 68.0, 61.4, 60.8, 55.2, 52.2, 39.4, 39.1, 38.9, 38.9, 38.8, 38.0, 32.7, 32.5, 29.8, 26.0, 25.0, 18.4, –5.3; HRMS calcd. For C<sub>24</sub>H<sub>38</sub>O<sub>5</sub>SiNa<sup>+</sup> [*M* + Na]<sup>+</sup> 457.2381, found 457.2384.

Representative  $^1\text{H}$  NMR (400 MHz,  $\text{CDCl}_3$ ) analysis of  $\text{SeO}_2$ -mediated allylic oxidation of bicyclic substrate 22a: (a) bicyclic substrate 22a; (b)  $\text{SeO}_2$  (1.8 equiv),  $\text{NaHCO}_3$  (5.0 equiv), 1,4-dioxane, 45  $^\circ\text{C}$ , 5 hours. 22a:30(ca. 3:1 mixture of diastereoisomers) ~ 3:1; (c)  $\text{SeO}_2$  (1.8 equiv),  $\text{NaHCO}_3$  (5.0 equiv), 1,4-dioxane, 75  $^\circ\text{C}$ , 5 hours. 22a:30(ca. 3:1 mixture of diastereoisomers) ~ 0.75:1; (d) PCC oxidation [PCC (2.0 equiv), Celite<sup>®</sup>,  $\text{CH}_2\text{Cl}_2$ , 25  $^\circ\text{C}$ , 4 hours] of allylic alcohol 30 leading to a single enone.

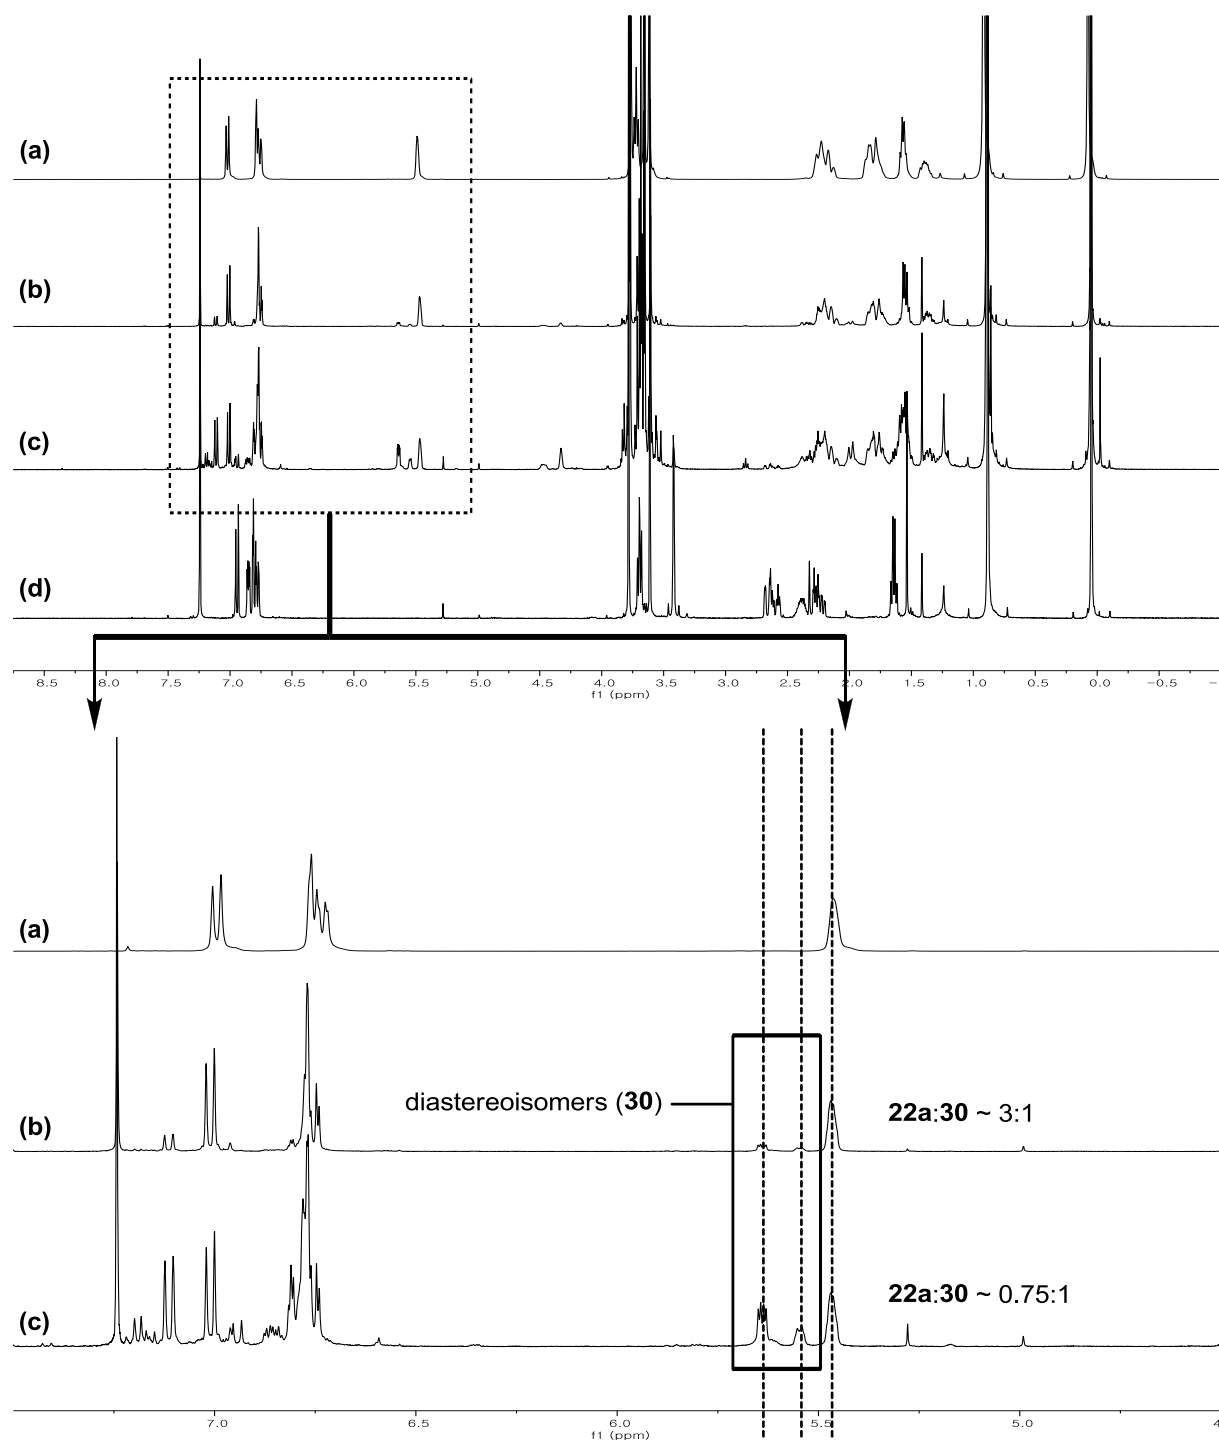

## Oxidation Studies on Macrocycle 2/2a:

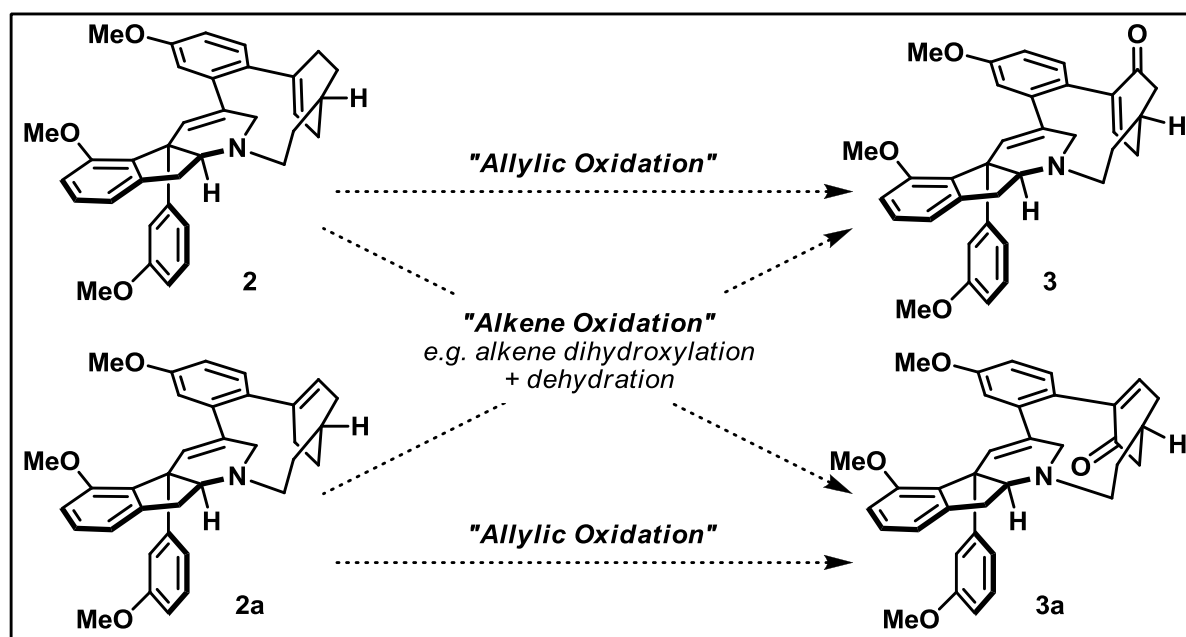

At the outset of our oxidation studies, we envisaged macrocycle **2/2a** could be used inter-exchangeably, as shown in the schematic diagram above, depending on the reaction conditions and the outcome of the reactions, to afford enones **3** and **3a**.

### Reaction conditions for model (22a) and real system (2/2a):

#### Allylic Oxidation:

SeO<sub>2</sub>, TBHP, CH<sub>2</sub>Cl<sub>2</sub>  
 SeO<sub>2</sub>, HCO<sub>2</sub>H, dioxane  
**SeO<sub>2</sub>, dioxane**  
 Ph<sub>2</sub>Se<sub>2</sub>, PhIO<sub>2</sub>, chlorobenzene  
 CrO<sub>3</sub>, 3,5-dimethylpyrazole  
 PCC, benzene  
 PDC, TBHP  
 Pd(OH)<sub>2</sub>/C, TBHP, CH<sub>2</sub>Cl<sub>2</sub>  
 Mn(OAc)<sub>3</sub>, O<sub>2</sub>, TBHP, EtOAc  
 CuBr, TBHP, benzene  
 Rh(cap)<sub>4</sub>, TBHP, CH<sub>2</sub>Cl<sub>2</sub>

#### Alkene Oxidation:

OsO<sub>4</sub> (cat.), NMO, THF/H<sub>2</sub>O  
 OsO<sub>4</sub> (cat.), NMO, pyridine  
 OsO<sub>4</sub> (cat.), K<sub>3</sub>Fe(CN)<sub>6</sub>, *t*BuOH  
 OsO<sub>4</sub> (1.0 equiv), THF/H<sub>2</sub>O  
  
*m*CPBA, CH<sub>2</sub>Cl<sub>2</sub>  
*m*CPBA, TFA, CH<sub>2</sub>Cl<sub>2</sub>  
*m*CPBA, TsOH, CH<sub>2</sub>Cl<sub>2</sub>  
  
 BH<sub>3</sub>•THF, THF  
 BH<sub>3</sub>•DMS, THF

### Summary:

- OsO<sub>4</sub>-mediated dihydroxylation reactions largely afforded starting material.
- Hydroboration also largely afforded unreacted starting material
- *m*CPBA-mediated epoxidations reactions afforded a mixture of recovered starting material, or multiple products under forcing conditions. These reactions overall proved irreproducible.
- Allylic oxidation: SeO<sub>2</sub>-based reagent system showed most promise and was further optimized for substrate **2/2a**
- All reactions monitored by tlc, NMR and LCMS analysis.

## Evidences in Support of the Strained Alkene in Substrate 2/2a:

### Experimentally (i. allylic oxidation):

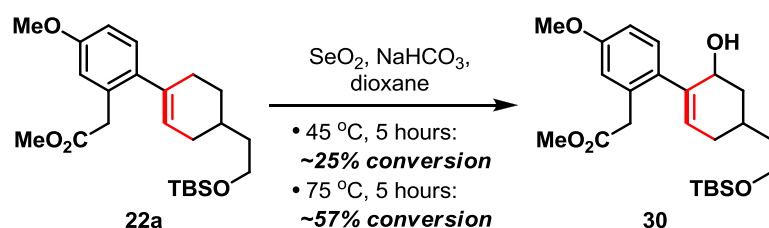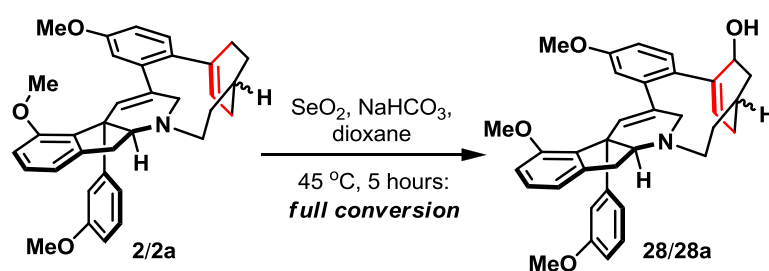

### Experimentally (ii. Suzuki cross-coupling):

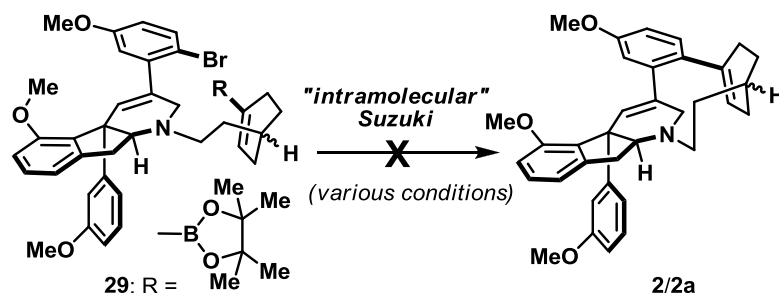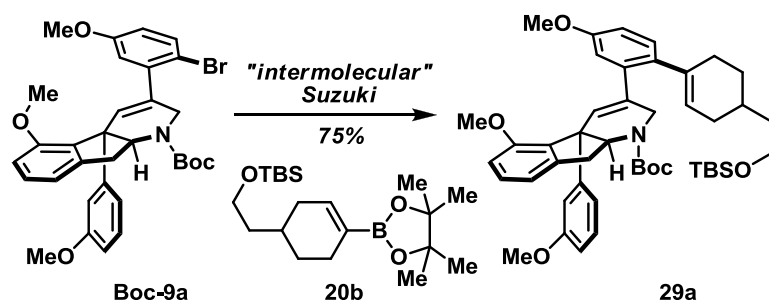

### Computationally:

Geometric optimization (at B3LYP/def2-SVP level of theory) performed on truncated 2 and 22a:

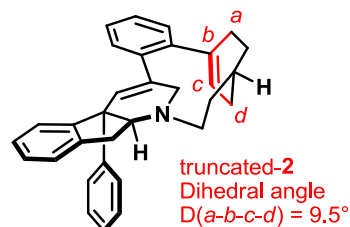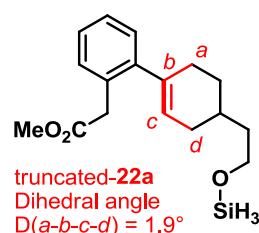

Pictorial showing distorted B-ring of Haouamine. Courtesy of: *Org. Lett.* **2006**, 8, 1901 (Wipf)

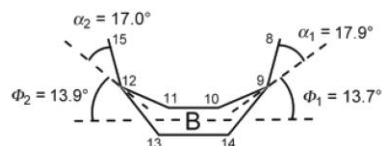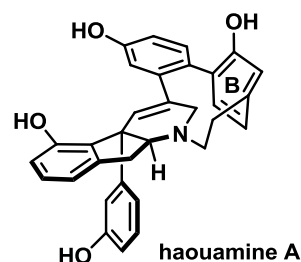

The computations were performed with Gaussian16 package.\* The geometries of truncated molecules were optimized using B3LYP functional\*\* in gas phase. The def2-SVP basis sets\*\*\* were employed for all atoms. Frequency analysis were performed to confirm each structure being a local minimum (no imaginary frequency).

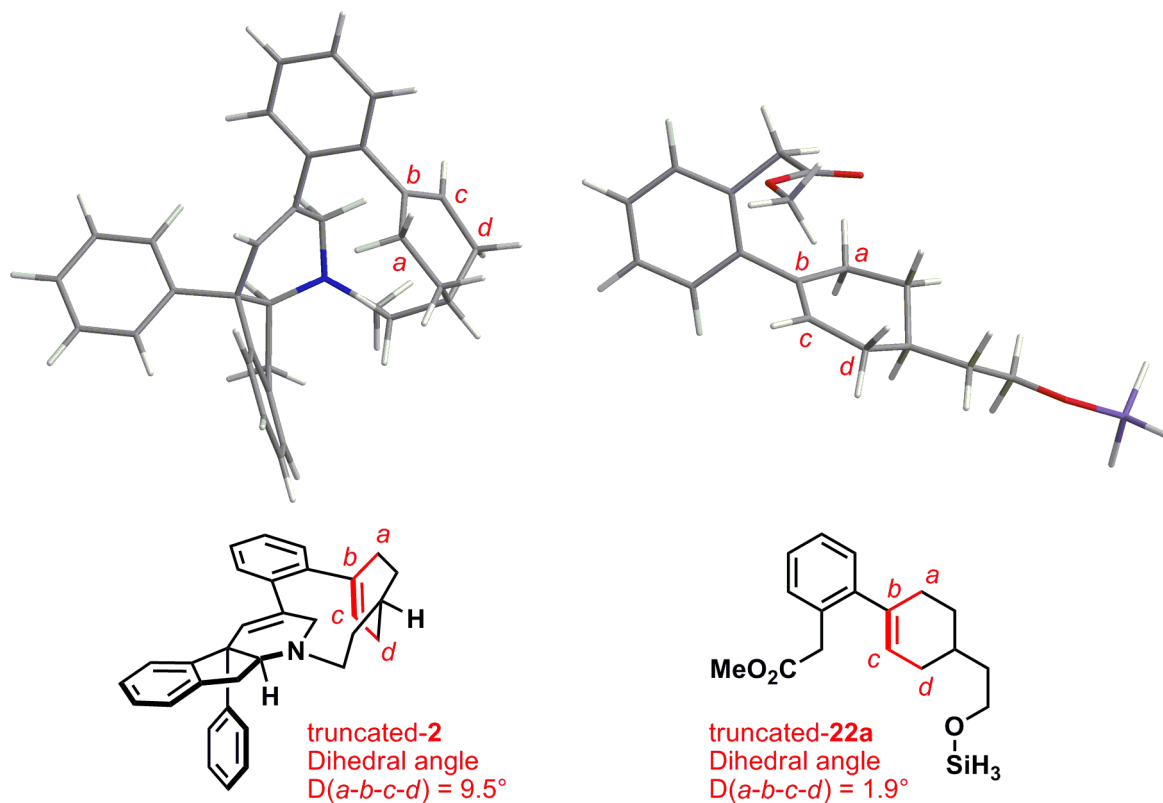

\*Frisch, M. J. et al. Gaussian 16, revision A.03; Gaussian, Inc.: Wallingford, CT, 2016.

\*\*(a) Becke, A. D. Density-functional thermochemistry. III. The role of exact exchange. *J. Chem. Phys.* **1993**, 98, 5648. (b) Lee, C.; Yang, W.; Parr, R. G. Development of the Colle-Salvetti correlationenergy formula into a functional of the electron density. *Phys. Rev. B: Condens. Matter Mater. Phys.* **1988**, 37, 785. (c) Stephens, P. J.; Devlin, F. J.; Chabalowski, C. F.; Frisch, M. J. Ab Initio Calculation of Vibrational Absorption and Circular Dichroism Spectra Using Density Functional Force Fields. *J. Phys. Chem.* **1994**, 98, 11623.

\*\*\*Weigend, F.; Ahlrichs, R. Balanced basis sets of split valence, triple zeta valence and quadruple zeta valence quality for H to Rn: Design and assessment of accuracy. *Phys. Chem. Chem. Phys.*, **2005**, 7, 3297.

## Diazoester 5a

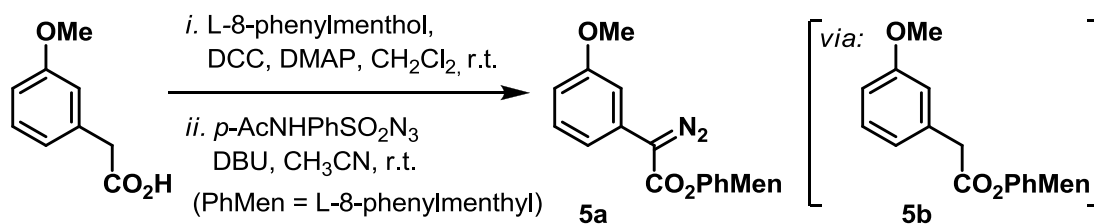

(i) To a stirred solution of 3-methoxyphenylacetic acid (0.80 g, 4.84 mmol) in  $\text{CH}_2\text{Cl}_2$  (48.0 mL) at room temperature was added L-8-phenylmenthol<sup>[9]</sup> (1.35 g, 5.81 mmol), DCC (1.20 g, 5.81 mmol) and DMAP (60.0 mg, 0.48 mmol). The resulting mixture was stirred for 16 h before it was concentrated under reduced pressure, and the resulting residue was purified by flash column chromatography (silica gel, hexanes:EtOAc 8:2) to afford ester **5b** (1.75 g, 95%) as a colorless oil.

(ii) To a stirred solution of ester **5b** (obtained above, 1.75 g, 4.60 mmol) in  $\text{CH}_3\text{CN}$  (23.0 mL) at room temperature was added DBU (0.98 g, 6.43 mmol) and  $p\text{-AcNHPhSO}_2\text{N}_3$  (1.32 g, 5.51 mmol). The resulting mixture was stirred for 16 h before it was concentrated under reduced pressure. The resulting residue was dissolved in  $\text{CH}_2\text{Cl}_2$  (25 mL) and diluted with  $\text{H}_2\text{O}$  (40 mL), the aqueous layer extracted with  $\text{CH}_2\text{Cl}_2$  ( $3 \times 25$  mL), combined organic layer washed with brine (50 mL), dried over anhydrous  $\text{Na}_2\text{SO}_4$  and concentrated under reduced pressure. The resulting residue was purified by flash column chromatography (silica gel, hexanes:EtOAc 9:1) to afford diazoester **5a** (1.74 g, 93%) as a red oil. **5a**:  $R_f$  = 0.64 (silica gel, hexanes:EtOAc 9:1); IR (film)  $\nu_{\text{max}}$  2955, 2920, 2083, 1739, 1689, 1494, 1234, 1150, 1025, 767, 699  $\text{cm}^{-1}$ ;  $^1\text{H}$  NMR (400 MHz,  $\text{CDCl}_3$ ):  $\delta$  7.29–7.23 (m, 4H), 7.20 (dd,  $J$  = 8.4, 6.6 Hz, 1H), 7.15–7.11 (m, 1H), 7.09 (t,  $J$  = 2.2 Hz, 1H), 6.86 (ddd,  $J$  = 7.8, 1.8, 0.9 Hz, 1H), 6.70 (ddd,  $J$  = 8.3, 2.6, 0.9 Hz, 1H), 5.07 (td,  $J$  = 10.8, 4.5 Hz, 1H), 3.83 (s, 3H), 2.05 (ddd,  $J$  = 12.2, 10.4, 3.6 Hz, 1H), 1.98–1.89 (m, 1H), 1.77 (dd,  $J$  = 13.5, 3.5 Hz, 1H), 1.67 (dt,  $J$  = 13.0, 3.1 Hz, 1H), 1.55 (s, 1H), 1.50 (tq,  $J$  = 5.6, 2.6 Hz, 1H), 1.35 (s, 3H), 1.24 (s, 3H), 1.16 (qd,  $J$  = 13.1, 3.4 Hz, 1H), 1.05 (q,  $J$  = 11.9 Hz, 1H), 0.89 ppm (d,  $J$  = 6.5 Hz, 3H);  $^{13}\text{C}$  NMR (100 MHz,  $\text{CDCl}_3$ ):  $\delta$  164.1, 160.1, 151.5, 129.8, 128.0, 127.6, 125.4, 125.2, 115.9, 111.4, 109.5, 74.5, 74.5, 55.4, 55.4, 51.1, 42.5, 39.8, 34.6, 31.7, 28.4, 26.8, 24.7, 21.9 ppm; HRMS calcd. For  $\text{C}_{25}\text{H}_{30}\text{N}_2\text{O}_3\text{Na}^+ [\text{M} + \text{Na}]^+$  429.2149, found 429.2150.

## Synthesis of Optically Active Primary Alcohol 15:

### a. Chiral Auxiliary Approach:

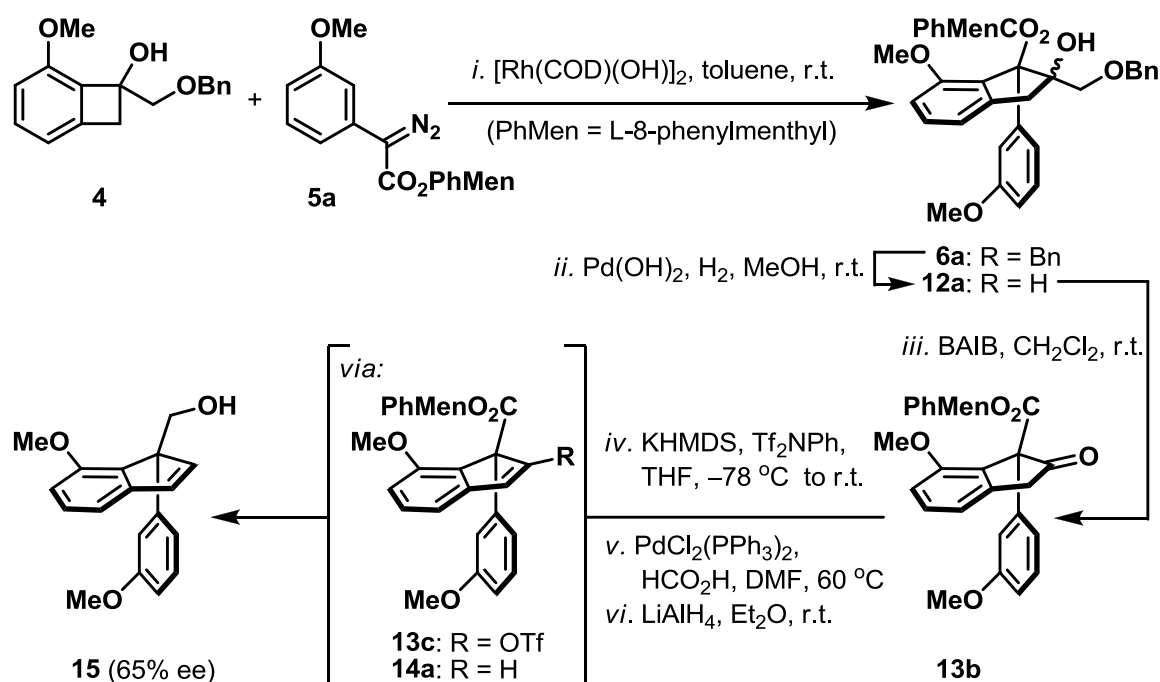

(i) To a stirred solution of tertiary alcohol **4** (78.0 mg, 0.28 mmol) in toluene (1.4 mL) at 0 °C was added diazoester **5a** (0.13 g, 0.31 mmol) followed by [Rh(COD)(OH)]<sub>2</sub> (5.0 mg, 11.0 μmol). The resulting mixture was stirred for 10 min before it was warmed to room temperature and stirred for 4 h. The resulting mixture was treated with additional [Rh(COD)(OH)]<sub>2</sub> (5.0 mg, 11.0 μmol) and stirred for 12 h before it was concentrated under reduced pressure. The resulting residue was purified by flash column chromatography (silica gel, hexanes:EtOAc 9.5:1→9:1) to afford tertiary alcohol **6a** (66.0 mg, 36%, unoptimized, complex mixture of 4 diastereoisomers) as a yellow oil. **6a**: *R<sub>f</sub>* = 0.5, 0.6 (silica gel, hexanes:EtOAc 8:2); IR (film) *v*<sub>max</sub> 3474, 3033, 2957, 2866, 1726, 1599, 1454, 1260, 1089, 735, 698 cm<sup>-1</sup>; HRMS calcd. For C<sub>42</sub>H<sub>48</sub>O<sub>6</sub>Na<sup>+</sup> [M + Na]<sup>+</sup> 671.3343, found 671.3345.

(ii) To a stirred solution of benzyl ether **6a** (65.0 mg, 0.10 mmol) in MeOH (2.5 mL) at room temperature was added Pd(OH)<sub>2</sub> on carbon (5 wt% on carbon, 106% wt/wt, 69.0 mg). The resulting mixture was purged with hydrogen gas (balloon bubbling) for 10 min then stirred under an atmosphere of hydrogen (balloon) for 2 h. The resulting mixture was filtered through a pad of silica gel and eluted with EtOAc (5 mL), and concentrated under reduced pressure to afford crude diol **12a** which was used directly in the subsequent reaction.



(iii) To a stirred solution of diol **12a** (obtained above) in  $\text{CH}_2\text{Cl}_2$  (2.0 mL) at room temperature was added BAIB (38.6 mg, 0.12 mmol). The resulting mixture was stirred for 1 h before it was washed with pH7 phosphate buffer (3 mL), the organic layer separated, dried over anhydrous  $\text{Na}_2\text{SO}_4$  and concentrated under reduced pressure. The resulting residue was purified by flash column chromatography (silica gel, hexanes:EtOAc 9.5:1) to afford keto ester **13b** (28.5 mg, 54% over two steps) as a colorless oil. **13b**:  $R_f$  = 0.70 (silica gel, hexanes:EtOAc 6:4); IR (film)  $\nu_{\text{max}}$  2960, 2920, 2871, 1736, 1588, 1484, 1212, 1046, 768, 701  $\text{cm}^{-1}$ ;  $^1\text{H}$  NMR (400 MHz,  $\text{CDCl}_3$ , mixture of 2 diastereoisomers):  $\delta$  7.43 (t,  $J$  = 7.9 Hz, 0.1H), 7.35 (td,  $J$  = 7.9, 7.4, 4.5 Hz, 0.9H), 7.30–7.17 (m, 4H), 7.17–7.08 (m, 2H), 7.01 (dd,  $J$  = 7.7, 1.2 Hz, 1H), 6.97–6.88 (m, 2H), 6.87–6.77 (m, 2H), 4.93–4.79 (m, 1H), 4.0 (d,  $J$  = 5.6 Hz, 0.2H), 3.76 (s, 3H), 3.75 (s, 2H), 3.67 (s, 0.5H), 3.66 (s, 0.5H), 3.59 (d,  $J$  = 5.1 Hz, 0.3H), 3.26 (d,  $J$  = 6.4 Hz, 0.2H), 3.23 (d,  $J$  = 5.4 Hz, 0.3H), 2.18 (dq,  $J$  = 12.4, 3.1 Hz, 0.5H), 2.14–1.94 (m, 0.3H), 1.92–1.82 (m, 0.2H), 1.69–1.52 (m, 2H), 1.47–1.36 (m, 2H), 1.29–1.13 (m, 2H), 1.14–1.01 (m, 3H), 1.01–0.88 (m, 2H), 0.86 (dd,  $J$  = 6.4, 1.4 Hz, 2H), 0.82–0.74 (m, 1.5H), 0.73–0.59 ppm (m, 2.5H); HRMS calcd. For  $\text{C}_{34}\text{H}_{38}\text{O}_5\text{Na}^+$   $[\text{M} + \text{Na}]^+$  549.2611, found 549.2612.

**Representative  $^1\text{H}$  NMR (400 MHz,  $\text{CDCl}_3$ , mixture of 2 diastereoisomers) of **13b****

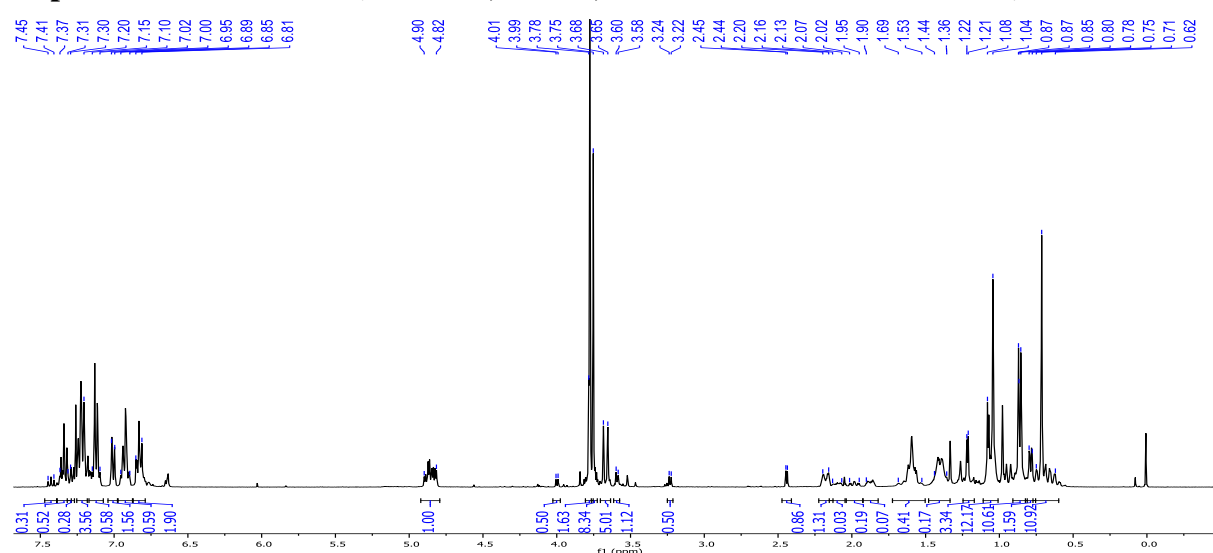

(iv) To a stirred solution of ketone **13b** (28.0 mg, 54.0  $\mu\text{mol}$ ) in THF (2.0 mL) at  $-78^\circ\text{C}$  was added KHMDS (0.7 M in toluene, 80  $\mu\text{L}$ , 59.4  $\mu\text{mol}$ ). The resulting mixture was stirred for 30 min before a solution of  $\text{Tf}_2\text{NPh}$  (25.0 mg, 70.0  $\mu\text{mol}$ ) in THF (1.0 mL) was added. The

resulting mixture was stirred for 15 min then warmed to room temperature and stirred for 2 h before it was quenched with  $\text{NH}_4\text{Cl}$  (3 mL, sat. aq.), extracted with EtOAc ( $3 \times 3$  mL), dried over anhydrous  $\text{Na}_2\text{SO}_4$  and concentrated under reduced pressure. The resulting residue was purified by flash column chromatography (silica gel, hexanes:EtOAc 9:1) to afford triflate **13c** (35.0 mg, 99%) as a yellow oil. **13c**:  $R_f = 0.56$  (silica gel, hexanes:EtOAc 8:2).

(v) To a stirred solution of triflate **13c** (obtained above) in DMF (2.0 mL) at room temperature was added  $\text{PdCl}_2(\text{PPh}_3)_2$  (1.9 mg, 2.7  $\mu\text{mol}$ ) and  $n\text{Bu}_3\text{N}$  (0.04 mL, 0.16 mmol). The resulting mixture was purged with argon (balloon bubbling) for 5 min before  $\text{HCO}_2\text{H}$  (5.1  $\mu\text{L}$ , 0.14 mmol) was added. The resulting mixture was placed into a pre-heated (60  $^\circ\text{C}$ ) oil bath and stirred for 1.5 h before it was cooled to room temperature, diluted with HCl (1 N aq., 5 mL), extracted with EtOAc ( $3 \times 2$  mL), combined organic layer dried over anhydrous  $\text{Na}_2\text{SO}_4$  and concentrated under reduced pressure. The resulting residue was purified by flash column chromatography (silica gel, hexanes:EtOAc 9:1) to afford alkenyl ester **14a** (21.6 mg, 78%) as a colorless oil. **14a**:  $R_f = 0.60$  (silica gel, hexanes:EtOAc 8:2);  $^1\text{H}$  NMR (400 MHz,  $\text{CDCl}_3$ , mixture of 2 diastereoisomers):  $\delta$  7.42–7.00 (m, 8H), 6.99–6.89 (m, 3H), 6.86–6.75 (m, 2H), 6.72 (d,  $J = 8.3$  Hz, 1H), 6.44 (dd,  $J = 7.6, 5.3$  Hz, 1H), 4.87 (td,  $J = 10.6, 4.3$  Hz, 1H), 3.83–3.70 (m, 5H), 2.11–2.01 (m, 1H), 1.69 (ddd,  $J = 12.1, 10.4, 3.5$  Hz, 1H), 1.40 (s, 1H), 1.32–1.19 (m, 1H), 1.19–1.07 (m, 4H), 1.07–0.89 (m, 4H), 0.89–0.76 (m, 4H), 0.76–0.57 ppm (m, 1H).

#### Representative $^1\text{H}$ NMR (400 MHz, $\text{CDCl}_3$ , mixture of 2 diastereoisomers) of **14a**

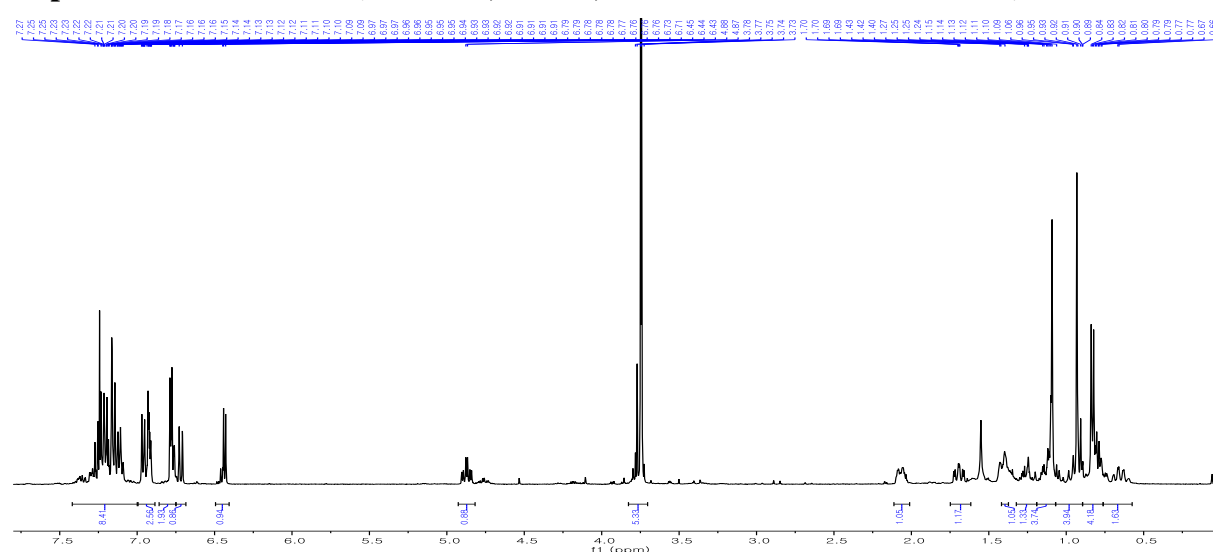

(vi) To a stirred suspension of  $\text{LiAlH}_4$  (2.0 mg, 46.0  $\mu\text{mol}$ ) in  $\text{Et}_2\text{O}$  (0.3 mL) at 0 °C was added a solution of alkenyl ester **14a** (21.6 mg, 42.0  $\mu\text{mol}$ ) in  $\text{Et}_2\text{O}$  (0.3 mL). The resulting mixture was stirred for 5 min then warmed to room temperature and stirred for 0.5 h before it was cooled to 0 °C and quenched sequentially with  $\text{H}_2\text{O}$  (50  $\mu\text{L}$ ),  $\text{NaOH}$  (15% aq., 50  $\mu\text{L}$ ) and  $\text{H}_2\text{O}$  (0.1 mL). The resulting mixture was warmed to room temperature and stirred for 5 min before it was filtered through a pad of Celite<sup>®</sup>, eluted with  $\text{EtOAc}$  (5 mL), and concentrated under reduced pressure. The resulting residue was purified by flash column chromatography (silica gel, hexanes: $\text{EtOAc}$  4:1) to afford optically active alcohol **15** (9.7 mg, 81%) as a colorless oil with characterization data identical to those obtained for the racemic compound.

### b. Resolution Approach:

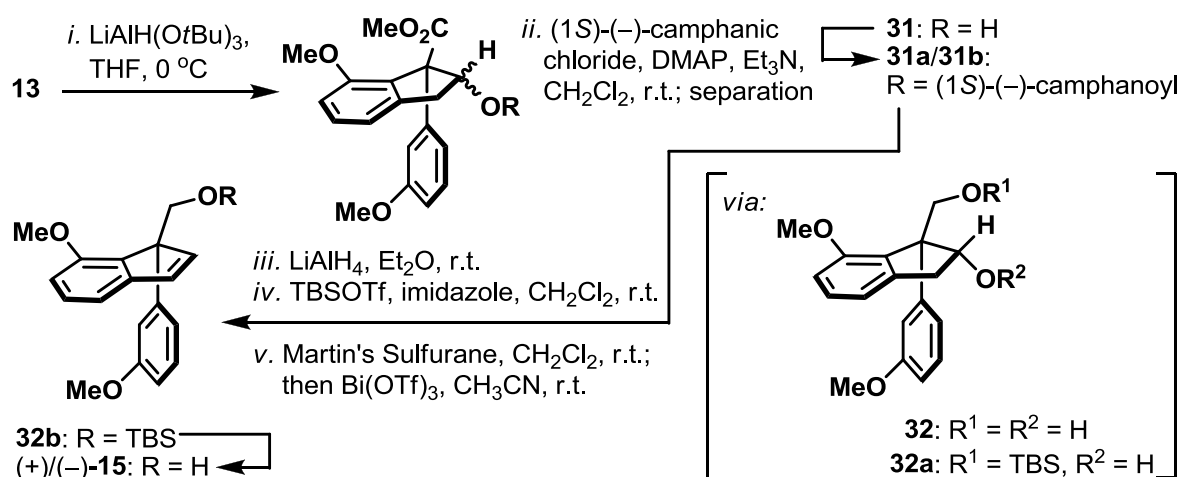

(i) To a stirred solution of keto ester **13** (1.0 equiv) in THF at -78 °C was added  $\text{LiAlH}(\text{O}t\text{Bu})_3$  (1.0 M in THF, 1.5 equiv). The resulting mixture was warmed to 0 °C and stirred for 3 h before it was quenched with  $\text{NH}_4\text{Cl}$  (sat. aq.), extracted with  $\text{EtOAc}$  (3 ×), combined organic layer washed with brine, dried over anhydrous  $\text{Na}_2\text{SO}_4$  and concentrated under reduced pressure. The resulting residue was filtered through a pad of silica gel and eluted with (hexanes: $\text{EtOAc}$  4:1), and concentrated under reduced pressure to afford alcohol **31** (92%, *ca.* 10:1 mixture of diastereoisomers) as an amorphous white solid. **31**:  $^1\text{H}$  NMR (400 MHz,  $\text{CDCl}_3$ , *ca.* 10:1 mixture of diastereoisomers):  $\delta$  7.31 (t,  $J$  = 7.6, 1H), 7.24 (t,  $J$  = 7.6, 1H), 6.90 (d,  $J$  = 7.5 Hz, 1H), 6.85 (d,  $J$  = 10.5 Hz, 1H), 6.80 (d,  $J$  = 8.3 Hz, 1H), 6.72–6.67 (m, 2H), 5.19–5.06 (m, 1H), 3.75 (s, 3H), 3.73 (s, 3H), 3.70 (s, 3H), 3.22 (dd,  $J$  = 15.3, 6.5 Hz, 1H), 2.54 (dd,  $J$  = 15.3, 8.1 Hz, 1H), 1.52 ppm (d,  $J$  = 10.2 Hz, 1H).

**Representative  $^1\text{H}$  NMR (400 MHz,  $\text{CDCl}_3$ , crude) of alcohol **31****

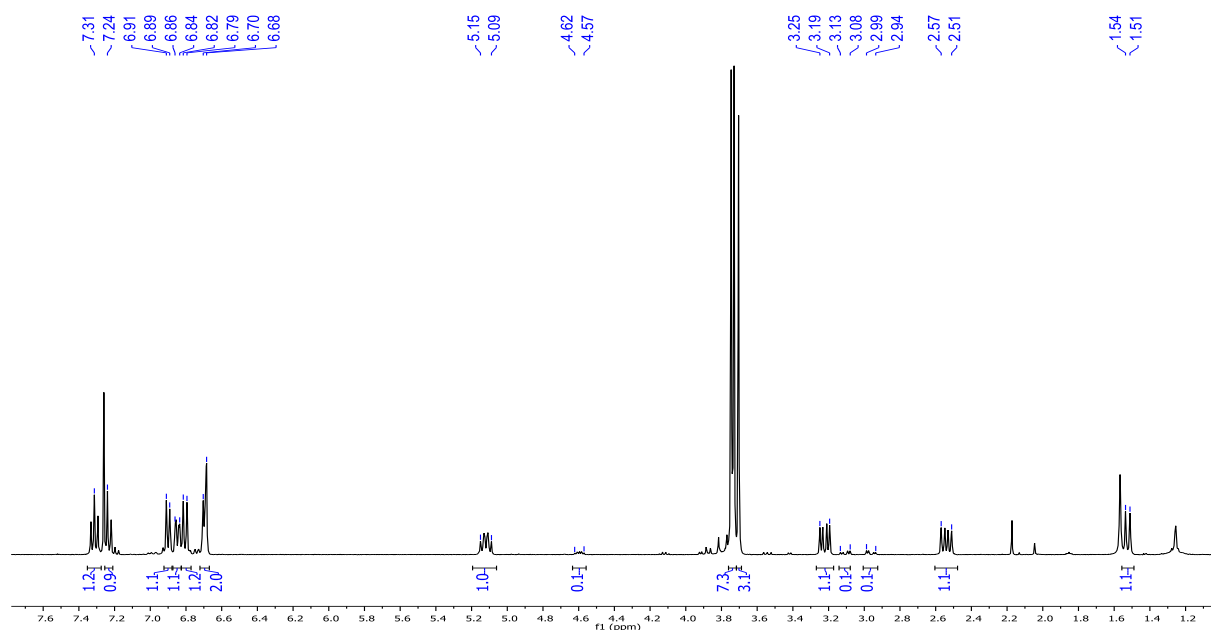

(ii) To a stirred solution of alcohol **31** (1.0 equiv) in  $\text{CH}_2\text{Cl}_2$  at room temperature was added DMAP (1.0 equiv),  $\text{Et}_3\text{N}$  (4.0 equiv) and (1*S*)-(-)-camphanic chloride (2.0 equiv). The resulting mixture was stirred for 1 h before it was quenched with  $\text{NH}_4\text{Cl}$  (sat. aq.), extracted with  $\text{EtOAc}$  (3  $\times$ ), combined organic layer dried over anhydrous  $\text{Na}_2\text{SO}_4$  and concentrated under reduced pressure. The resulting residue was purified by flash column chromatography (silica gel,  $\text{CH}_2\text{Cl}_2$ :acetone 99.3:0.7) to afford diastereomeric camphanic ester **31a** (less polar isomer, 49%) as a white foam and **31b** (more polar isomer, 48%) as a colorless oil. **31a** and **31b**: IR (film)  $\nu_{\text{max}}$  2962, 2837, 1789, 1734, 1591, 1483, 1267, 1233, 1059, 733  $\text{cm}^{-1}$ ; HRMS calcd. For  $\text{C}_{29}\text{H}_{32}\text{O}_8\text{Na}^+$   $[\text{M} + \text{Na}]^+$  531.1989, found 531.1988.

**Less polar camphanic ester 31a**:  $R_f$  = 0.3 (silica gel,  $\text{CH}_2\text{Cl}_2$ :acetone 99:1);  $^1\text{H}$  NMR (400 MHz,  $\text{CDCl}_3$ ):  $\delta$  7.37–7.30 (m, 1H), 7.16 (t,  $J$  = 8.0 Hz, 1H), 6.91 (d,  $J$  = 7.5 Hz, 1H), 6.82 (d,  $J$  = 8.3 Hz, 1H), 6.77 (ddd,  $J$  = 8.2, 2.6, 0.9 Hz, 1H), 6.69 (ddd,  $J$  = 7.8, 1.8, 0.9 Hz, 1H), 6.64 (dd,  $J$  = 2.6, 1.7 Hz, 1H), 6.14 (t,  $J$  = 6.3 Hz, 1H), 3.74 (s, 3H), 3.72 (s, 3H), 3.69 (s, 3H), 3.45 (dd,  $J$  = 16.0, 6.6 Hz, 1H), 2.88 (dd,  $J$  = 16.0, 6.1 Hz, 1H), 2.19–2.10 (m, 1H), 1.80 (ddd,  $J$  = 12.6, 10.5, 4.4 Hz, 1H), 1.75–1.66 (m, 1H), 1.57 (ddt,  $J$  = 12.8, 8.9, 5.0 Hz, 1H), 1.04 (s, 3H), 0.87 (s, 3H), 0.78 ppm (s, 3H);  $^{13}\text{C}$  NMR (101 MHz,  $\text{CDCl}_3$ ):  $\delta$  178.4, 173.2, 167.0, 158.9, 156.8, 142.0, 136.0, 130.6, 128.8, 128.3, 122.1, 117.4, 116.1, 112.6, 110.3, 90.9, 80.9, 65.6, 55.6, 55.3, 54.8, 54.2, 52.9, 37.4, 30.4, 28.9, 16.6, 16.6, 9.8 ppm.

**More polar camphanic ester **31b**:**  $R_f = 0.2$  (silica gel,  $\text{CH}_2\text{Cl}_2$ :acetone 99:1);  $^1\text{H}$  NMR (400 MHz,  $\text{CDCl}_3$ ):  $\delta$  7.34 (t,  $J = 7.9$  Hz, 1H), 7.17 (t,  $J = 8.1$  Hz, 1H), 6.91 (d,  $J = 7.5$  Hz, 1H), 6.83 (d,  $J = 8.3$  Hz, 1H), 6.80–6.76 (m, 1H), 6.67 (d,  $J = 7.1$  Hz, 2H), 6.15 (t,  $J = 6.2$  Hz, 1H), 3.73 (s, 6H), 3.70 (s, 3H), 3.47 (dd,  $J = 16.0, 6.5$  Hz, 1H), 2.86 (dd,  $J = 16.0, 5.9$  Hz, 1H), 1.95 (dd,  $J = 12.4, 8.8$  Hz, 1H), 1.74 (ddt,  $J = 12.8, 8.4, 4.3$  Hz, 2H), 1.64–1.52 (m, 1H), 1.02 (s, 3H), 0.74 ppm (d,  $J = 2.0$  Hz, 6H);  $^{13}\text{C}$  NMR (101 MHz,  $\text{CDCl}_3$ ):  $\delta$  177.9, 172.9, 166.8, 159.0, 156.8, 141.9, 136.2, 130.6, 128.7, 128.4, 121.9, 117.3, 116.2, 112.5, 110.4, 91.0, 81.0, 65.5, 55.6, 55.3, 54.8, 54.1, 52.9, 37.9, 30.3, 29.1, 16.8, 16.6, 9.7 ppm.

(iii) To a stirred suspension of  $\text{LiAlH}_4$  (2.0 equiv) in  $\text{Et}_2\text{O}$  at  $0^\circ\text{C}$  was added a solution of camphanic ester **31a** (1.0 equiv) in  $\text{Et}_2\text{O}$ . The resulting mixture was stirred for 5 min then warmed to room temperature and stirred for 1 h before it was cooled to  $0^\circ\text{C}$  and quenched sequentially with  $\text{H}_2\text{O}$ , NaOH (15% aq.) and  $\text{H}_2\text{O}$ . The resulting mixture was warmed to room temperature and stirred for 5 min before it was filtered through a pad of Celite<sup>®</sup>, eluted with  $\text{EtOAc}$ , and concentrated under reduced pressure to afford the corresponding diol **32** (95%) as a colorless oil. **32**:  $^1\text{H}$  NMR (400 MHz,  $\text{CDCl}_3$ ):  $\delta$  7.29 (d,  $J = 7.8$  Hz, 1H), 7.23 (t,  $J = 8.0$  Hz, 1H), 6.93 (d,  $J = 7.4$  Hz, 1H), 6.85–6.77 (m, 2H), 6.63 (d,  $J = 7.9$  Hz, 1H), 6.54 (s, 1H), 4.47–4.34 (m, 2H), 4.16 (d,  $J = 11.9$  Hz, 1H), 3.75 (s, 3H), 3.73 (s, 3H), 3.13 (dd,  $J = 15.3, 7.2$  Hz, 1H), 2.91 (br s, 1H), 2.58 ppm (dd,  $J = 15.3, 9.4$  Hz, 1H).

### Representative $^1\text{H}$ NMR (400 MHz, $\text{CDCl}_3$ , crude) of diol **32**

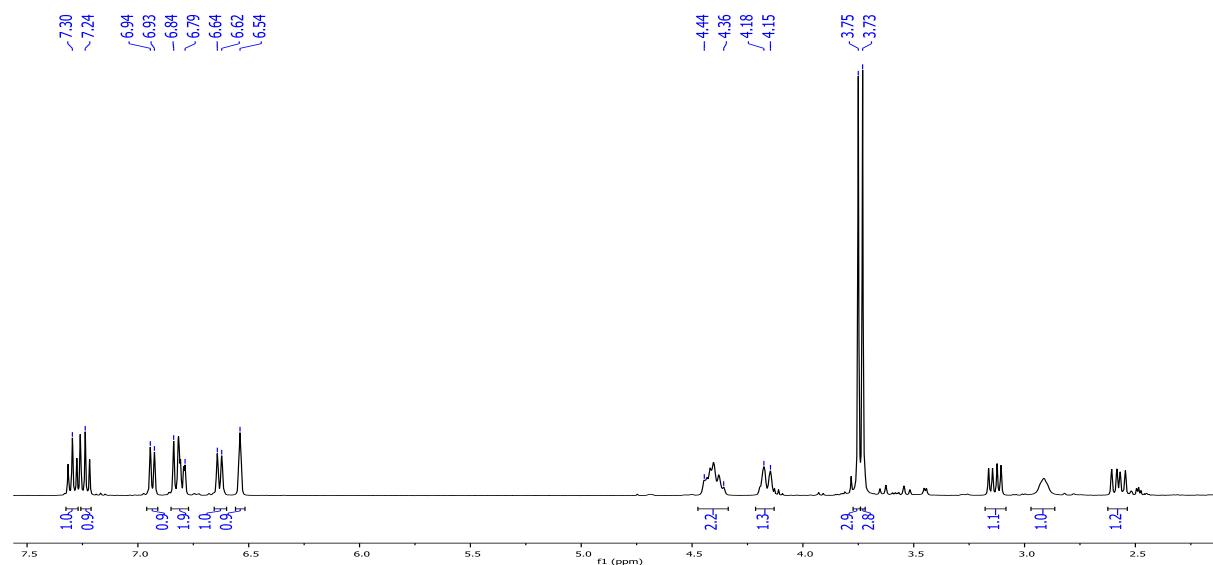

(iv) To a stirred solution of diol **32** (1.0 equiv) in CH<sub>2</sub>Cl<sub>2</sub> at room temperature was added imidazole (4.0 equiv) and TBSOTf (2.0 equiv). The resulting mixture was stirred for 3 h before it was passed through a pad of silica gel and eluted with (hexanes:EtOAc 9:1), and concentrated under reduced pressure to afford primary mono-silyl ether **32a** (81%) as a colorless oil.

(v) To a stirred solution of secondary alcohol **32a** (1.0 equiv) in CH<sub>2</sub>Cl<sub>2</sub> at room temperature was added Martin's sulfurane (1.5 equiv). The resulting mixture was stirred for 3 h before it was filtered through a pad of silica gel and eluted with (hexanes:EtOAc 95:5), and concentrated under reduced pressure to afford indene **32b** as a colorless oil. **32b**: *R<sub>f</sub>* = 0.65 (silica gel, hexanes:EtOAc 2:1); IR (film)  $\nu_{\text{max}}$  2953, 2929, 2856, 1599, 1473, 1261, 1098, 850, 776 cm<sup>-1</sup>; <sup>1</sup>H NMR (400 MHz, CDCl<sub>3</sub>):  $\delta$  7.25–7.19 (m, 1H), 7.11 (t, *J* = 8.0 Hz, 1H), 7.01–6.97 (m, 1H), 6.94 (d, *J* = 7.4 Hz, 1H), 6.88 (d, *J* = 7.8 Hz, 1H), 6.75–6.62 (m, 4H), 4.77 (d, *J* = 9.6 Hz, 1H), 3.77–3.73 (m, 1H), 3.73 (s, 3H), 3.66 (s, 3H), 0.80 (s, 9H), 0.00 (s, 3H), –0.08 ppm (s, 3H); <sup>13</sup>C NMR (101 MHz, CDCl<sub>3</sub>):  $\delta$  159.2, 155.6, 146.3, 145.1, 140.9, 135.1, 129.6, 129.0, 128.5, 120.0, 114.4, 113.7, 111.4, 108.8, 65.5, 63.9, 55.2, 55.1, 25.7, 18.1, –5.4, –5.6 ppm; HRMS calcd. For C<sub>24</sub>H<sub>32</sub>O<sub>3</sub>SiNa<sup>+</sup> [*M* + Na]<sup>+</sup> 419.2013, found 419.2016.

To a stirred solution silyl ether **32b** (obtained above) in CH<sub>3</sub>CN/H<sub>2</sub>O (98:2) at room temperature was added Bi(OTf)<sub>3</sub> (1.5 equiv). The resulting mixture was stirred for 2 h before it was concentrated under reduced pressure, and the resulting residue was purified by flash column chromatography (silica gel, hexanes:EtOAc 4:1) to afford alkenyl alcohol **15** (70% over two steps) as a colorless oil. All characterization data for optically active alcohol **15** are identical to those obtained for the racemic compound [(+)-**15**: [ $\alpha$ ]<sub>D</sub><sup>24</sup> = +255 (*c* = 0.29, CHCl<sub>3</sub>); (–)-**15**: [ $\alpha$ ]<sub>D</sub><sup>24</sup> = –261 (*c* = 0.59, CHCl<sub>3</sub>)]. The reaction sequence developed for the conversion of racemic **15** to racemic amino-alcohol **7** is directly applicable for optically active (+)-**15** and (–)-**15** [(+)-**7**: [ $\alpha$ ]<sub>D</sub><sup>24</sup> = +77.1 (*c* = 1.27, CHCl<sub>3</sub>); (–)-**7**: [ $\alpha$ ]<sub>D</sub><sup>24</sup> = –76.3 (*c* = 1.11, CHCl<sub>3</sub>)].

Representative  $^1\text{H}$  NMR (400 MHz,  $\text{CDCl}_3$ ): mixture of diastereomeric Mosher esters derived from racemic alkenyl alcohol **15** (top); mixture of diastereomeric Mosher esters derived from optically active alkenyl alcohol **15** (chiral auxiliary approach, middle); mixture of diastereomeric Mosher esters derived from optically active alkenyl alcohol **15** (resolution approach, bottom)

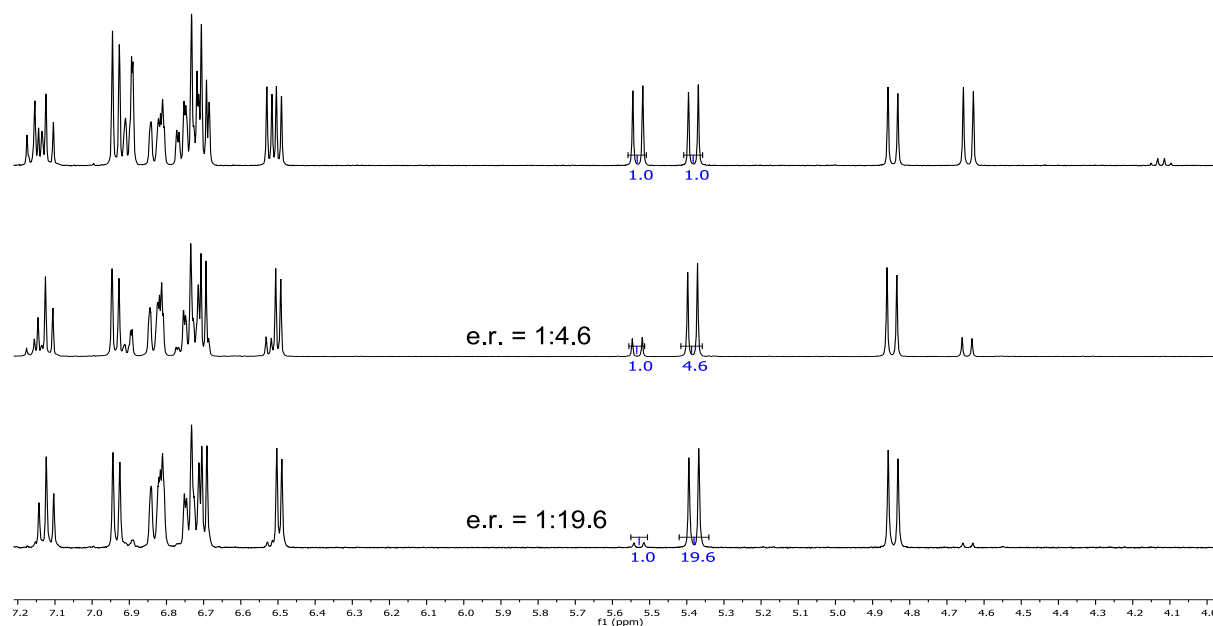

### Preparation of Mosher Ester Derivative of Alkenyl Alcohol **15**:

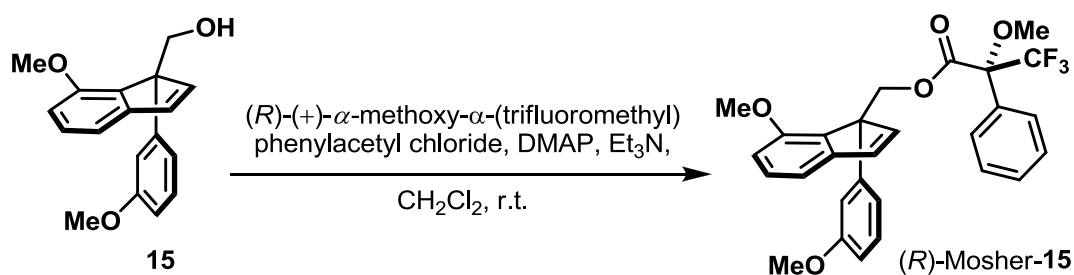

To a stirred solution of alkenyl alcohol **15** (1.0 equiv.) in  $\text{CH}_2\text{Cl}_2$  (0.1 M) at room temperature was added DMAP (0.1 equiv.),  $\text{Et}_3\text{N}$  (4.0 equiv.) and  $(R)\text{-}(+)\text{-}\alpha\text{-methoxy-}\alpha\text{-(trifluoromethyl)phenylacetyl}$  chloride (1.2 equiv.). The resulting mixture was stirred for 2 h before it was quenched with  $\text{NH}_4\text{Cl}$  (sat. aq.), extracted with  $\text{EtOAc}$ , dried over anhydrous  $\text{Na}_2\text{SO}_4$  and concentrated under reduced pressure. The resulting residue was purified by flash column chromatography (silica gel, hexanes: $\text{EtOAc}$  9.5:1) to afford  $(R)\text{-Mosher-15}$  as a colorless oil.

**Representative  $^{19}\text{F}$  NMR (376 MHz,  $\text{CDCl}_3$ ): mixture of diastereomeric Mosher esters derived from racemic alkenyl alcohol 15 (top); mixture of diastereomeric Mosher esters derived from optically active alkenyl alcohol 15 (chiral auxiliary approach, middle); mixture of diastereomeric Mosher esters derived from optically active alkenyl alcohol 15 (resolution approach, bottom)**

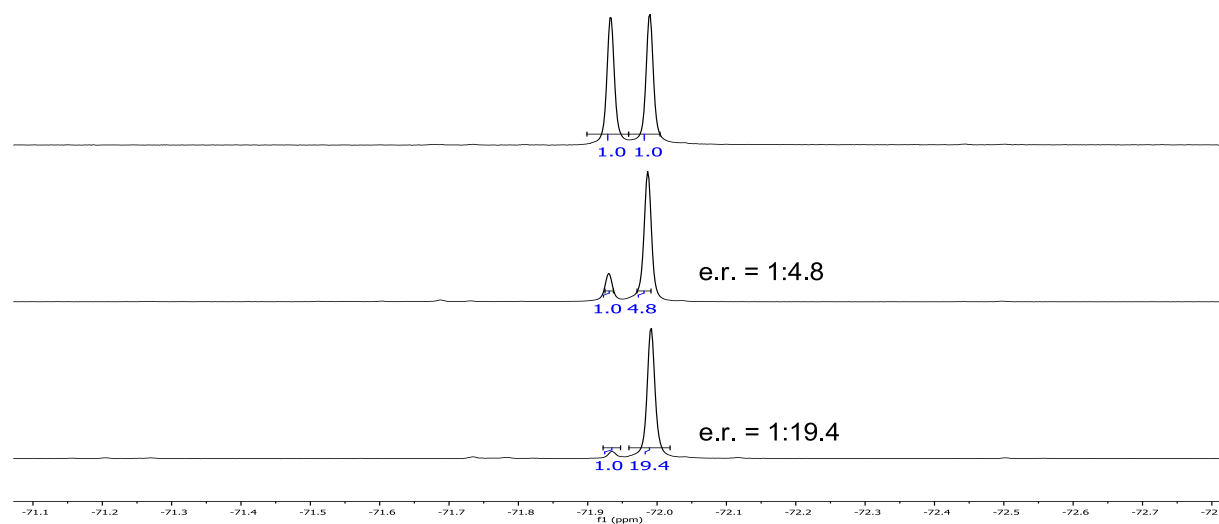



## II) Abbreviations

BAIB = diacetoxyiodo)benzene

Bn = benzyl

Boc<sub>2</sub>O = di-*tert*-butyl dicarbonate

Boc = *tert*-butoxycarbonyl

B<sub>2</sub>Pin<sub>2</sub> = bis(pinacolato)diboron

COD = cyclooctadienyl

DBU = 1,8-diazabicyclo[5.4.0]undec-7-ene

DCC = *N,N'*-dicyclohexylcarbodiimide

DMA = *N,N'*-dimethylacetamide

DMAP = 4-dimethylaminopyridine

DMF = *N,N'*-dimethylformamide

DMP = Dess-Martin periodinane

dppf = 1,1'-Bis(diphenylphosphino)ferrocene

EDC = *N*-(3-dimethylaminopropyl)-*N'*-ethylcarbodiimide

KHMDS = potassium bis(trimethylsilyl)amide

PCC = pyridinium chlorochromate

Pd(dppf)Cl<sub>2</sub> = [1,1'-Bis(diphenylphosphino)ferrocene]dichloropalladium(II)

PivOH = 2,2-dimethylpropionic acid

PPh<sub>3</sub> = triphenylphosphine

Rh<sub>2</sub>(Oct)<sub>4</sub> = rhodium(II) octanoate, dimer

TBAF = tetra-*n*-butylammonium fluoride

TBS = *tert*-butyldimethylsilyl

TBSOTf = *tert*-butyldimethylsilyl trifluoromethanesulfonate

TMDSO = 1,1,3,3-tetramethyldisiloxane

Tf<sub>2</sub>NPh = *N*-phenyl-bis(trifluoromethanesulfonimide)

Tf = trifluoromethanesulfonyl

Ts = *p*-toluenesulfonyl

TsCl = *p*-toluenesulfonyl chloride

### III) References

1. For preparation of (benzyloxymethyl)tri-*n*-butylstannane, see: Di Bussolo, V.; Fiasella, A.; Romano Maria, R.; Favero, L.; Pineschi, M.; Crotti, P. *Org. Lett.* **2007**, *9*, 4479.
2. For preparation of ketone **10**, see: Chen, P. H.; Savage, N. A.; Dong, G. *Tetrahedron* **2014**, *70*, 4135.
3. For preparation of diazoester **5**, see: Chan, W.; Yeung, S.; Zhou, Z.; Chan, A. S. C.; Yu, W. *Org. Lett.* **2010**, *12*, 604.
4. For preparation of ketone **19**, see: (a) Desrat, S.; Remeur, C.; Roussi, F. *Org. Biomol. Chem.* **2015**, *13*, 5520; (b) Ihara, M.; Taniguchi, T.; Makita, K.; Takano, M.; Ohnishi, M.; Taniguchi, N.; Fukumoto, K.; Kabuto, C. *J. Am. Chem. Soc.* **1993**, *115*, 8107.
5. For preparation of quinolinamide **21**, see: Zhao, Q.; Poisson, T.; Pannecoucke, X.; Bouillon, J.-P.; Besset, T. *Org. Lett.* **2017**, *19*, 5106.
6. Jeong, J. H.; Weinreb, S. M. *Org. Lett.* **2006**, *8*, 2309.
7. Cao, L.; Wang, C.; Wipf, P. *Org. Lett.* **2019**, *21*, 1538.
8. Burns, N. Z.; Krylova, I. N.; Hannoush, R. N.; Baran, P. S. *J. Am. Chem. Soc.* **2009**, *131*, 26, 9172.
9. For preparation of L-8-phenylmenthol, see: Ort, O. *Org. Synth.* **1987**, *65*, 203.

# IV) $^1\text{H}$ and $^{13}\text{C}$ NMR Spectra for Compounds

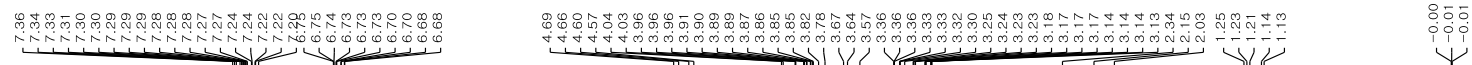

$^1\text{H}$  NMR (400 MHz,  $\text{CDCl}_3$ )

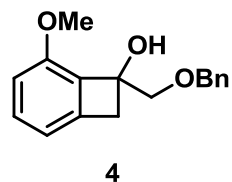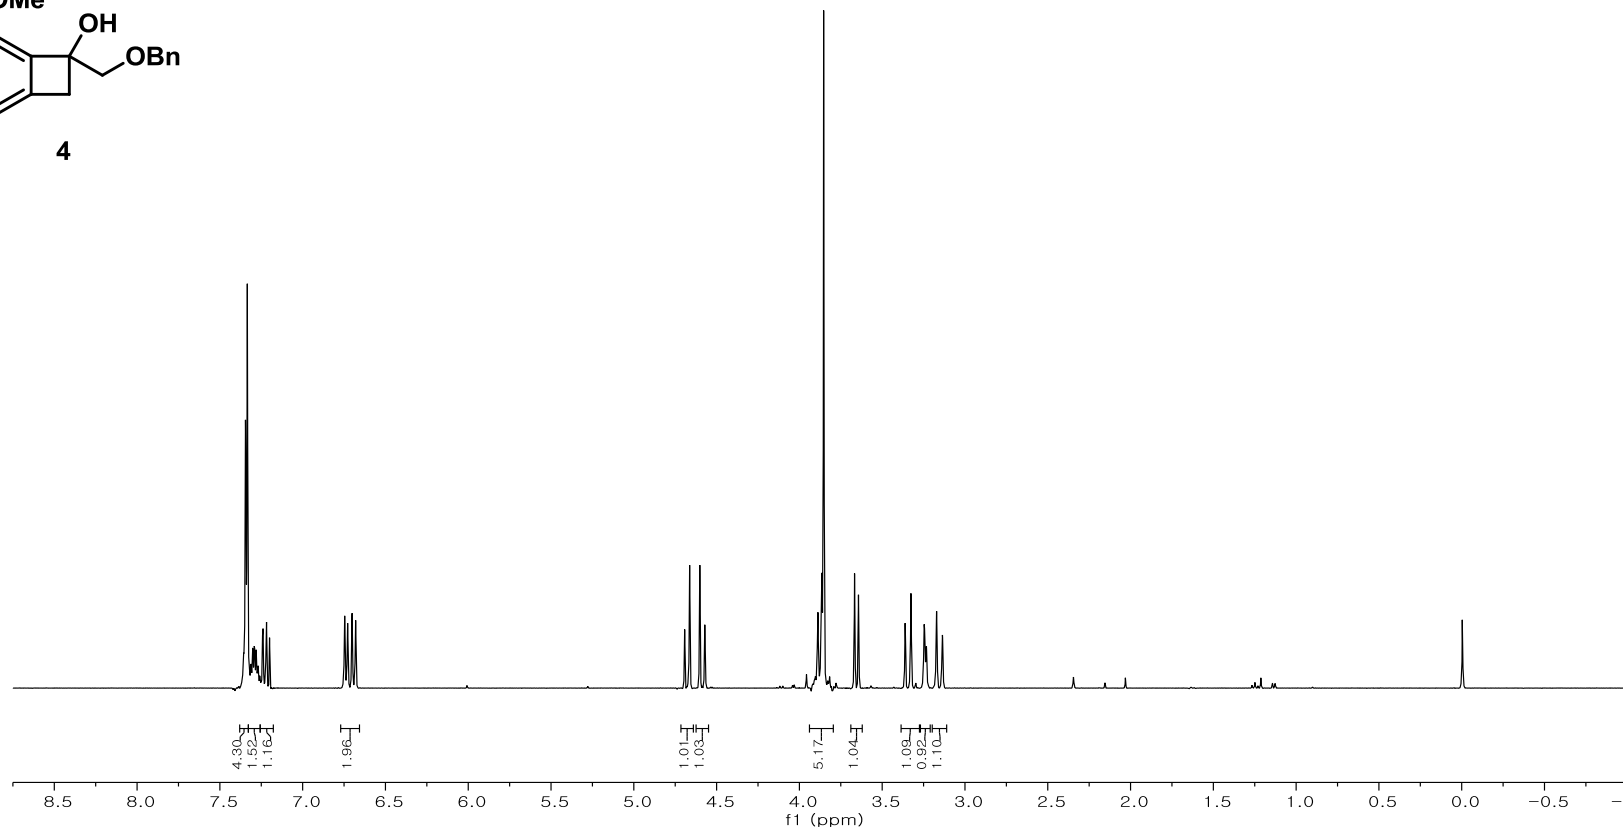

$^{13}\text{C}$  NMR (101 MHz,  $\text{CDCl}_3$ )

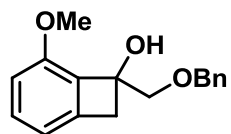

**4**

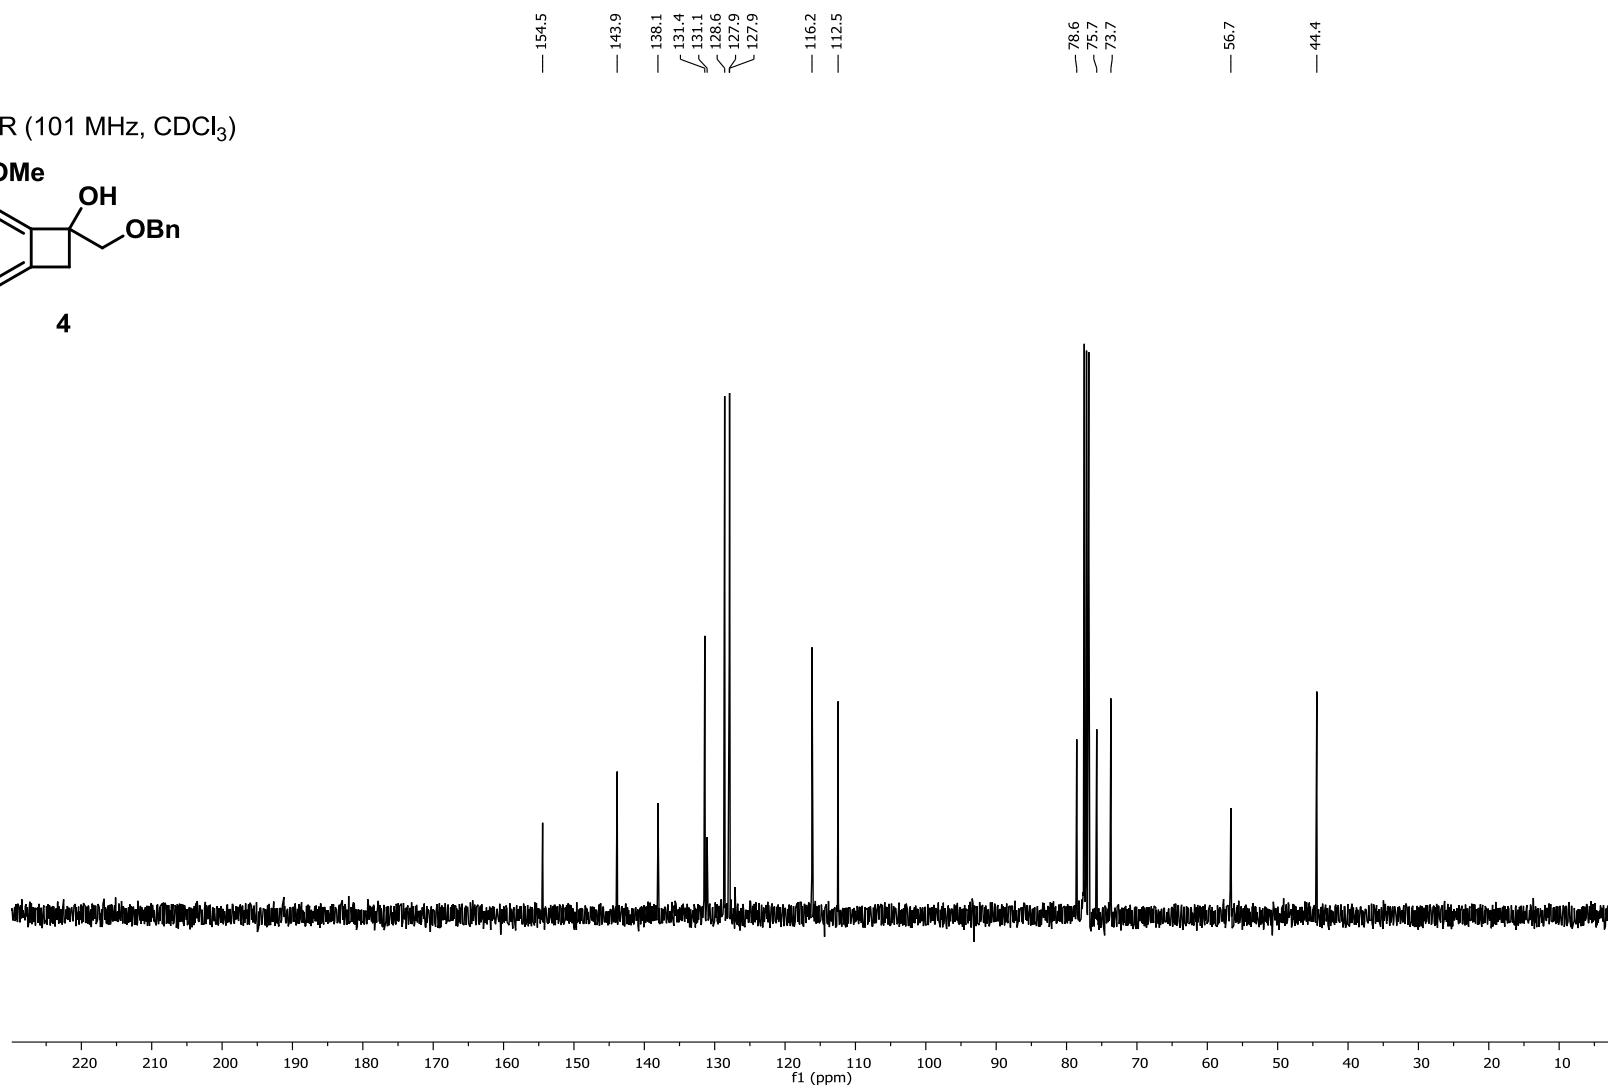

$^1\text{H}$  NMR (400 MHz,  $\text{CDCl}_3$ )

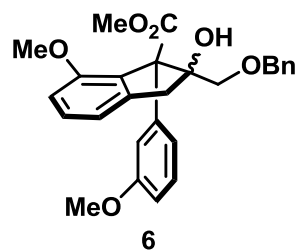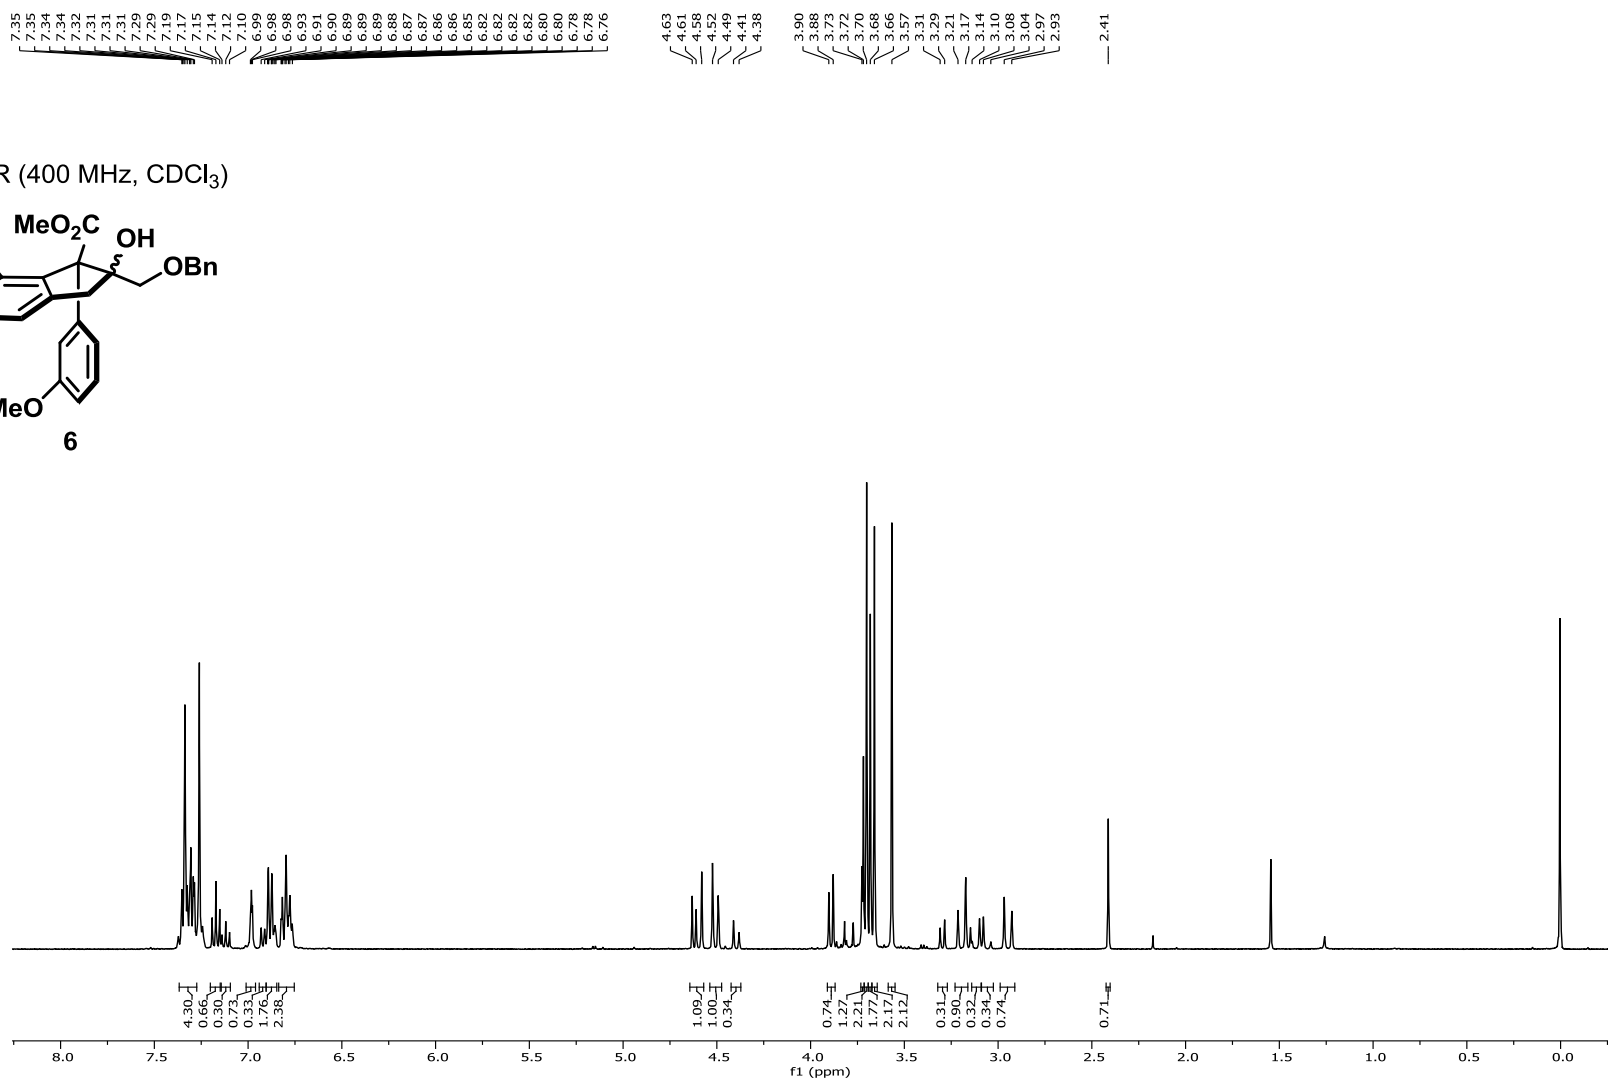

$^{13}\text{C}$  NMR (101 MHz,  $\text{CDCl}_3$ )

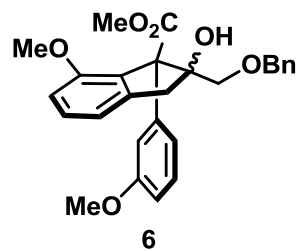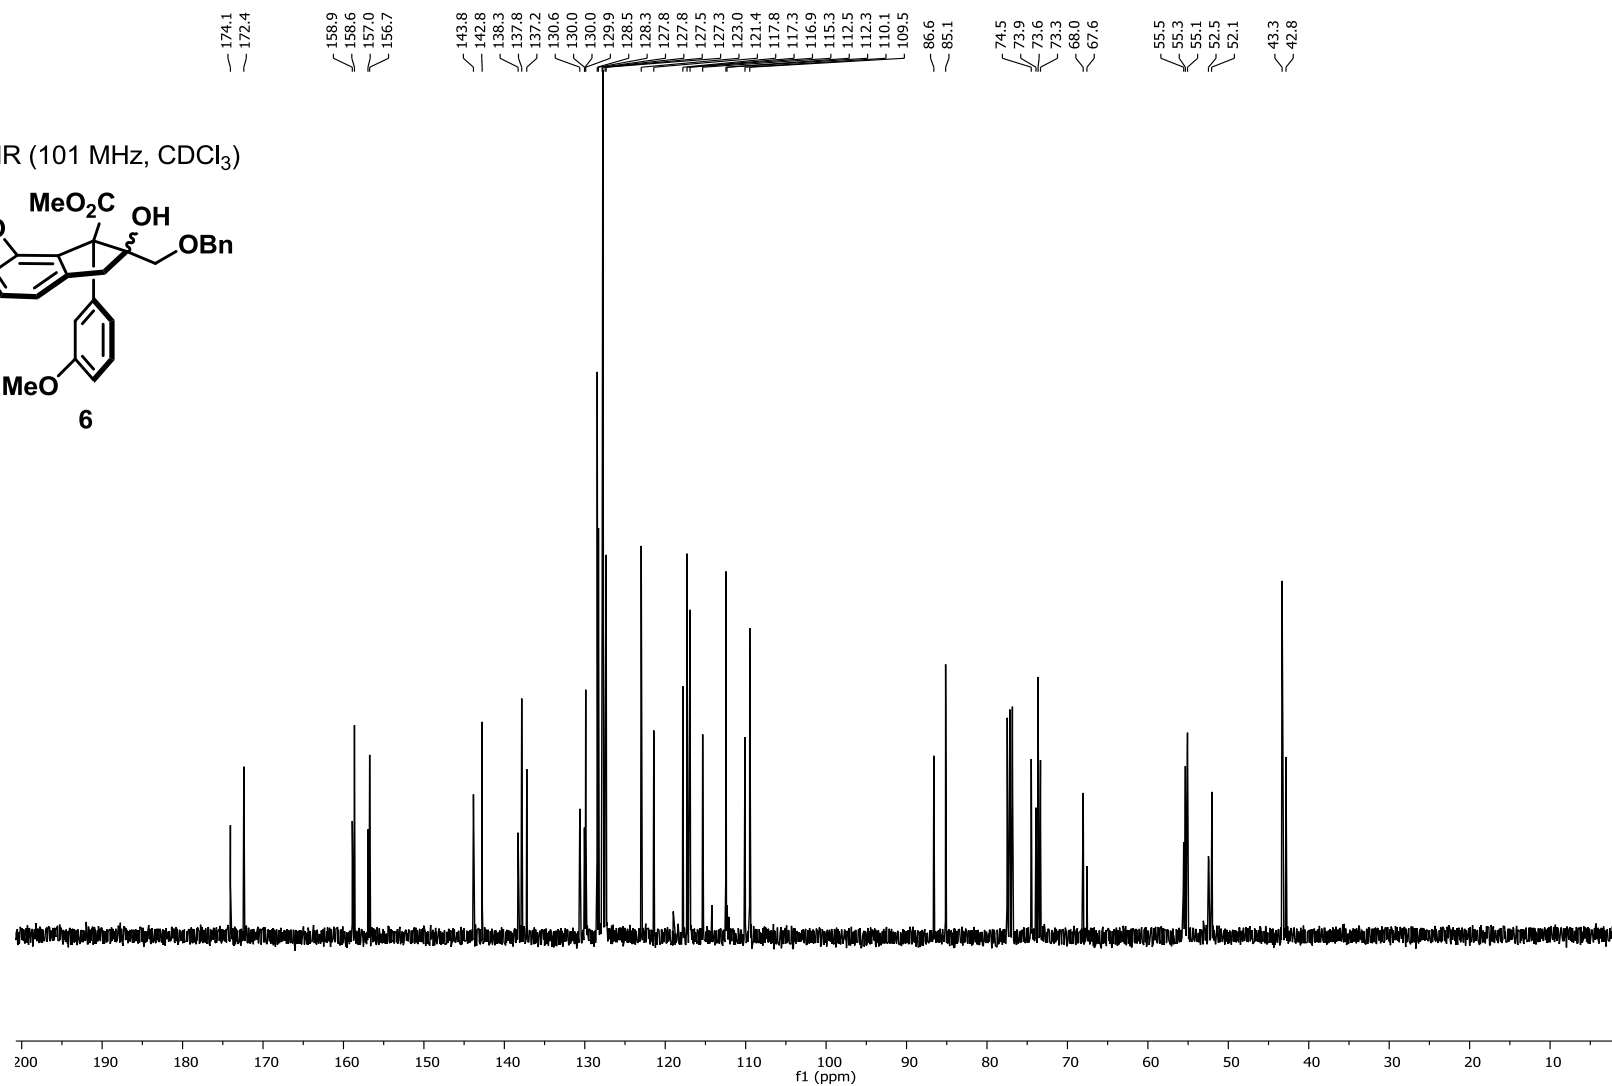

<sup>1</sup>H NMR (400 MHz, CDCl<sub>3</sub>)

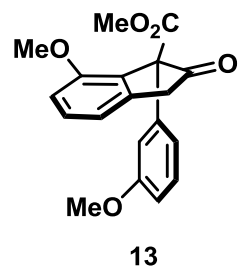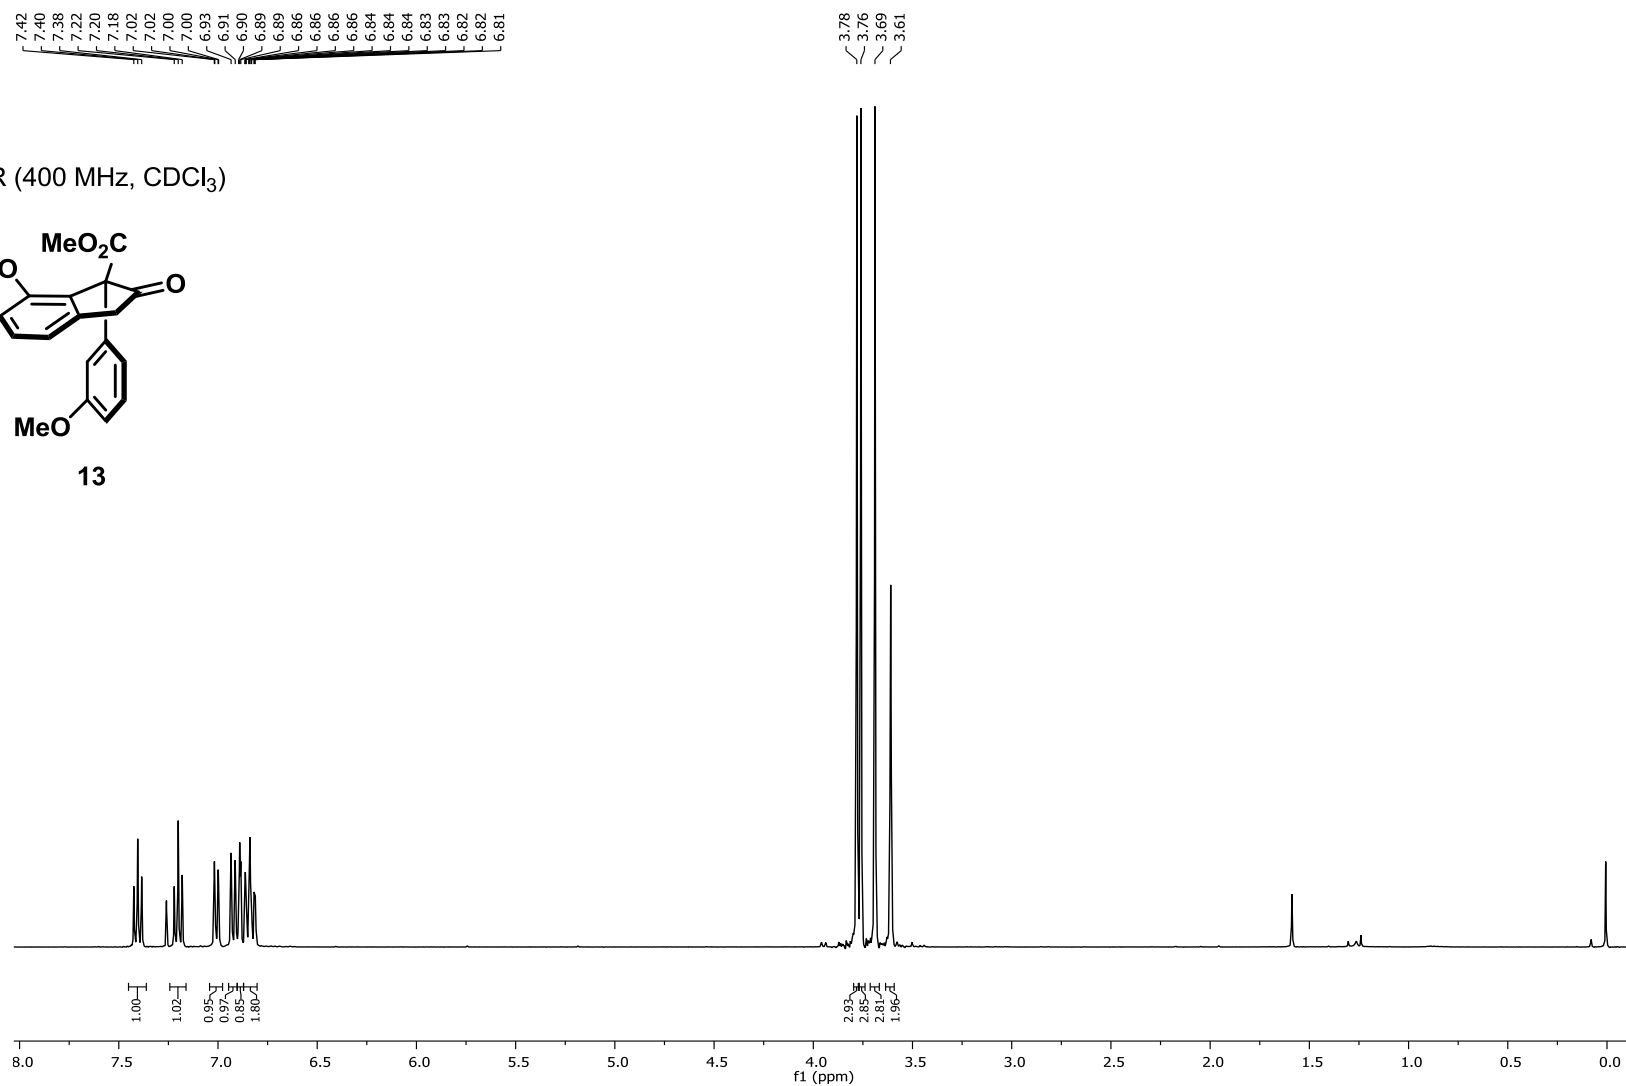

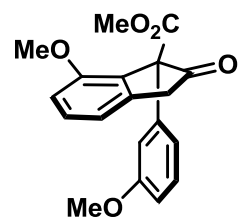

13

<sup>13</sup>C NMR (101 MHz, CDCl<sub>3</sub>)

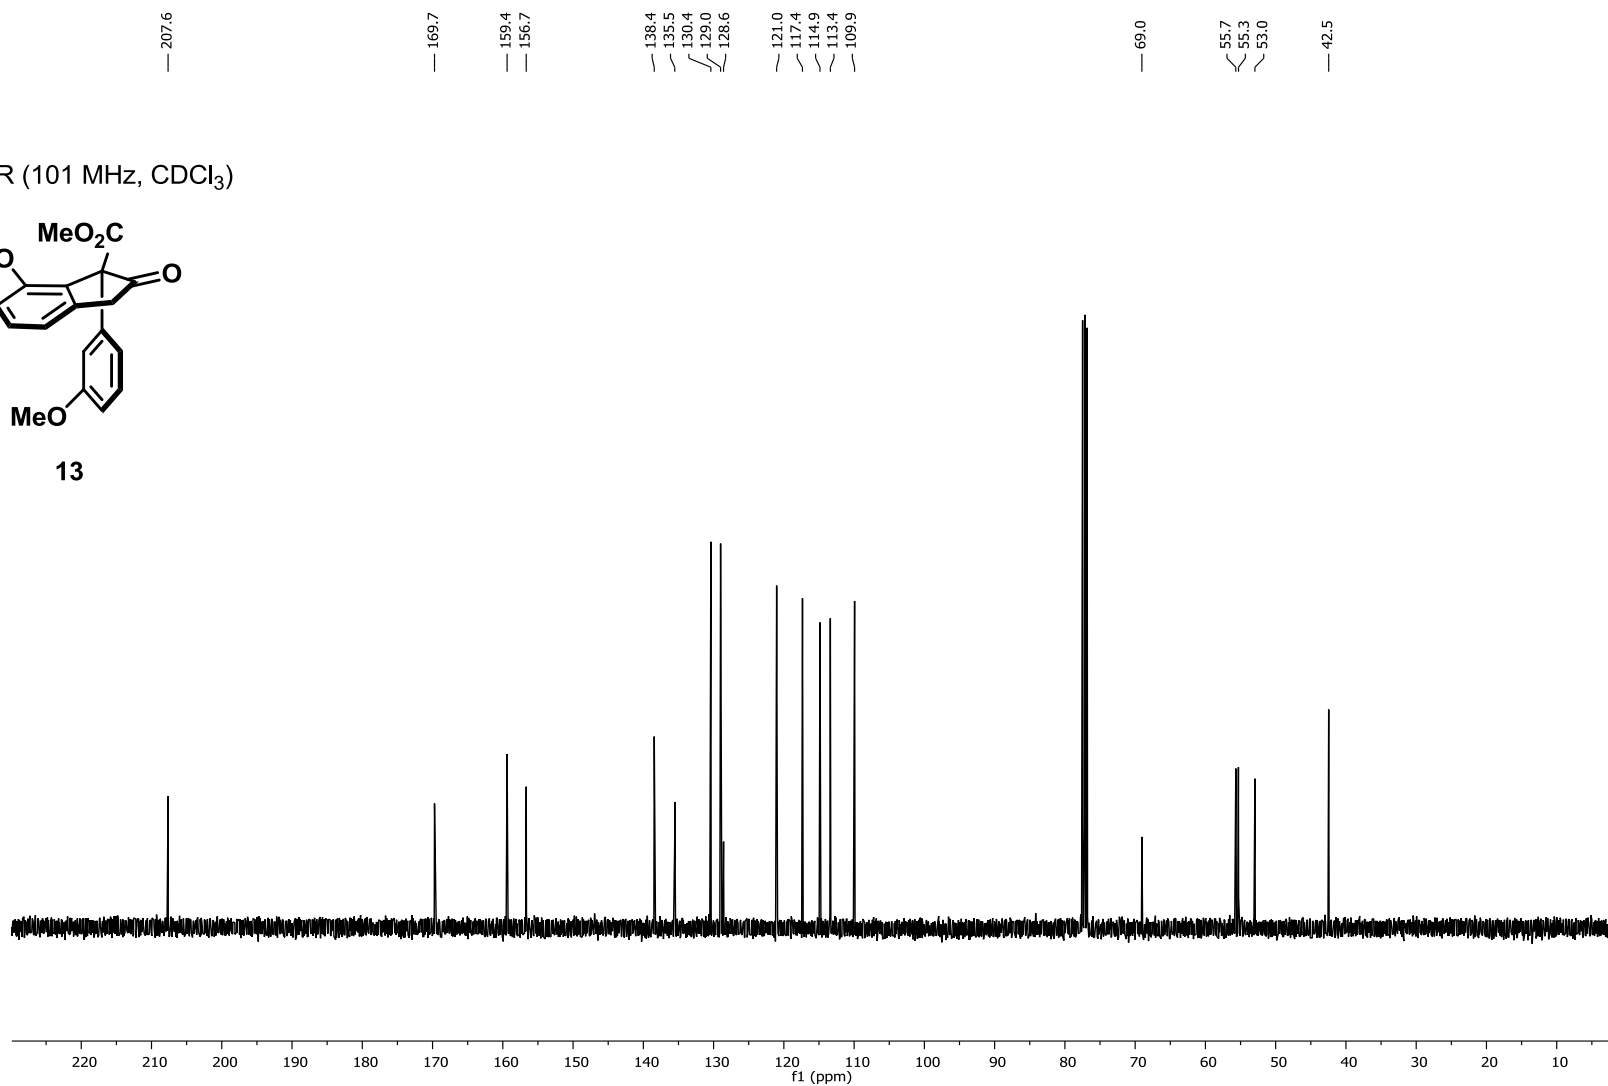



<sup>1</sup>H NMR (400 MHz, CDCl<sub>3</sub>)

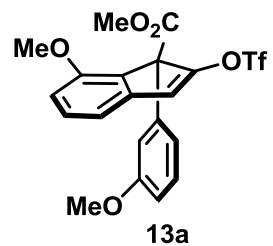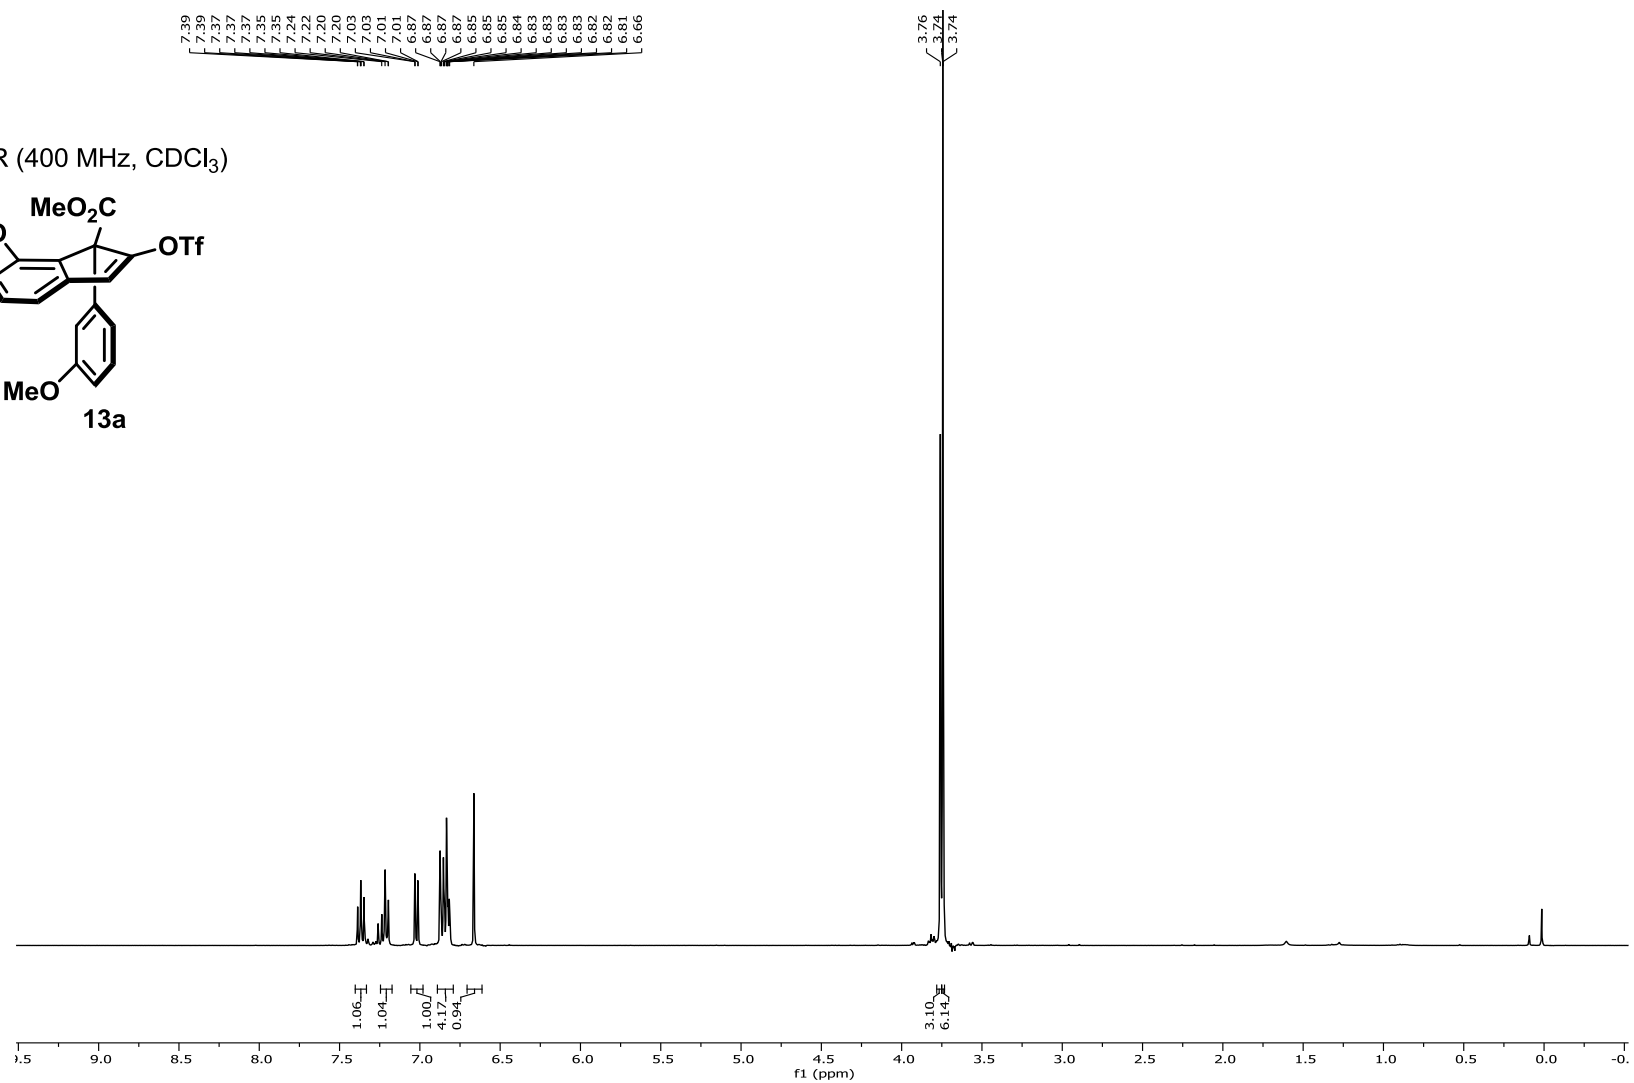

$^{13}\text{C}$  NMR (101 MHz,  $\text{CDCl}_3$ )

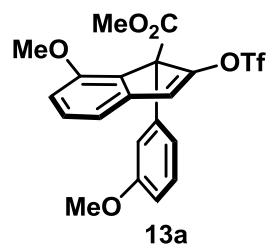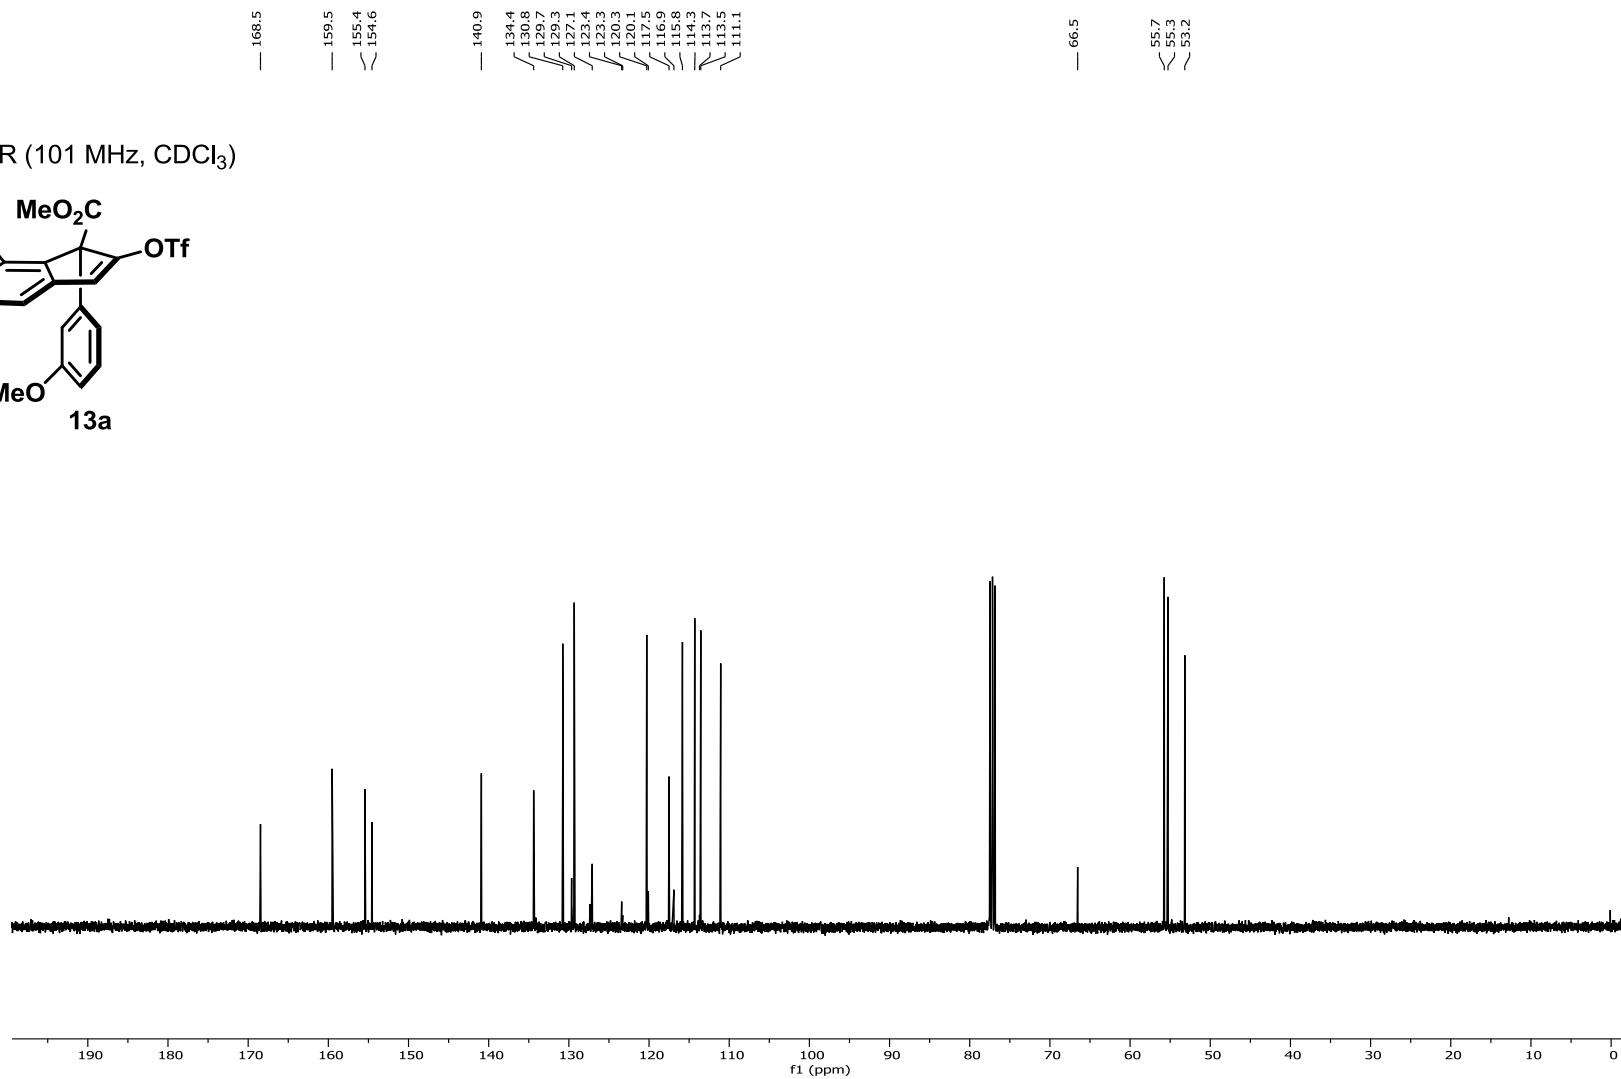

<sup>1</sup>H NMR (400 MHz, CDCl<sub>3</sub>)

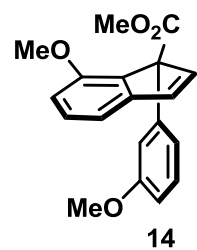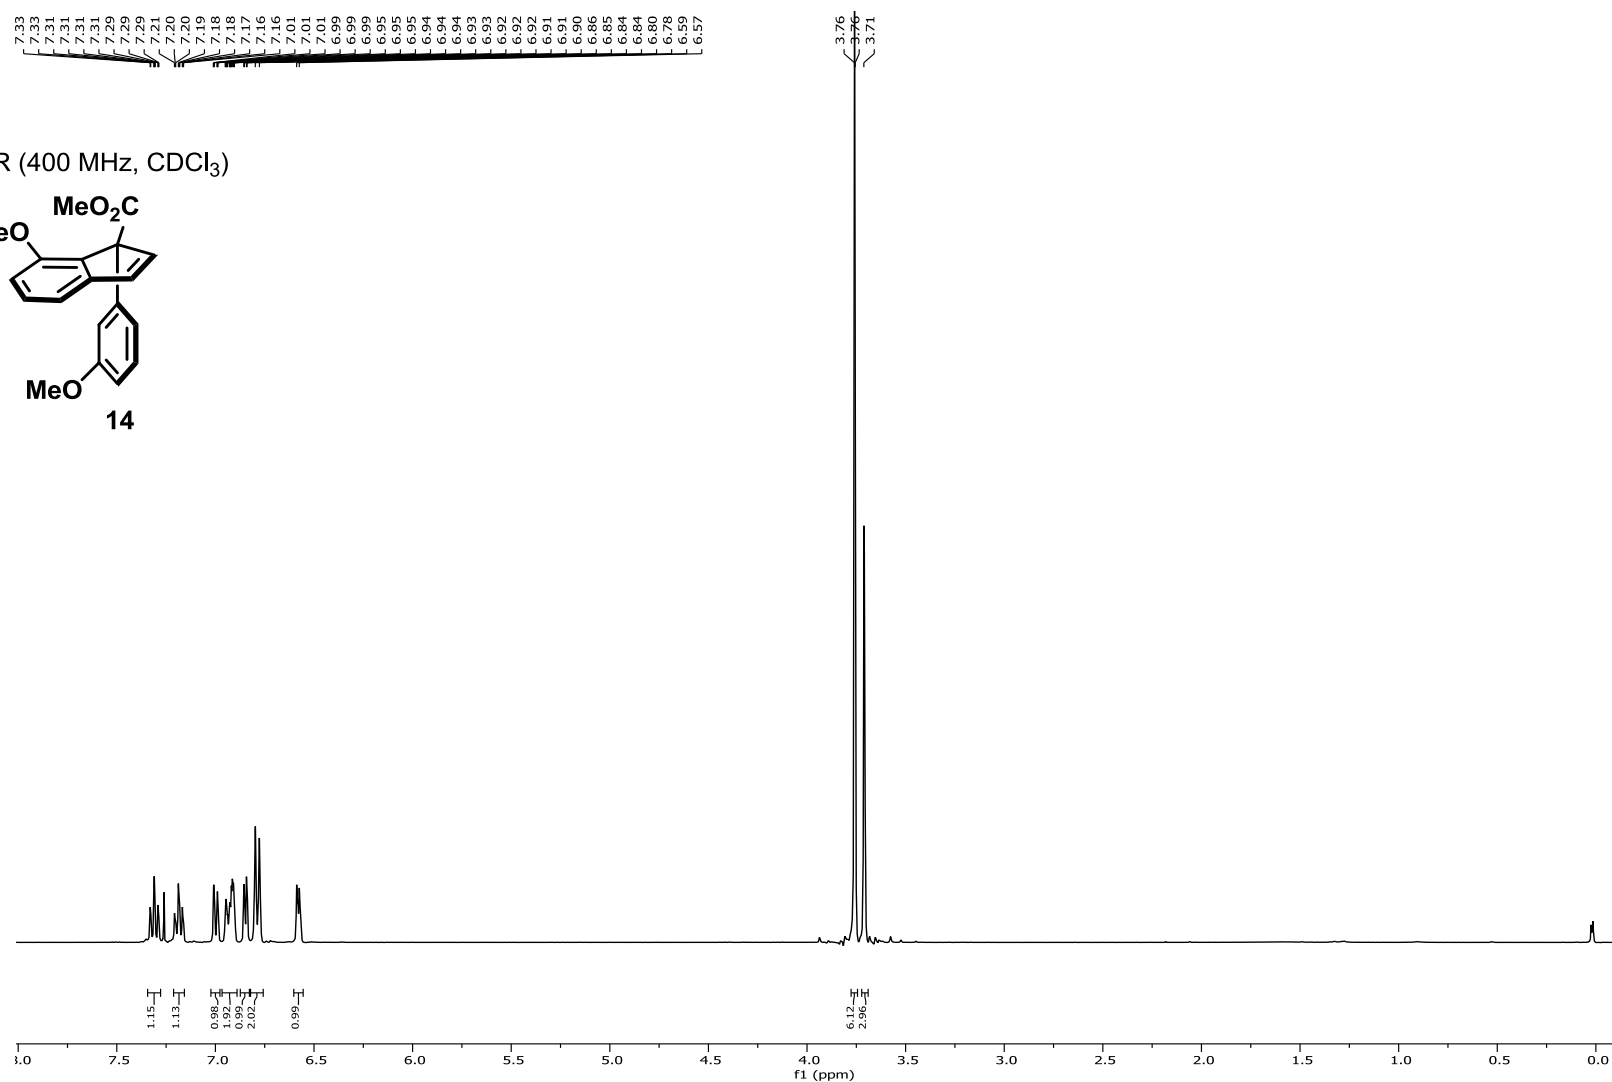

$^{13}\text{C}$  NMR (101 MHz,  $\text{CDCl}_3$ )

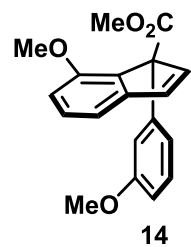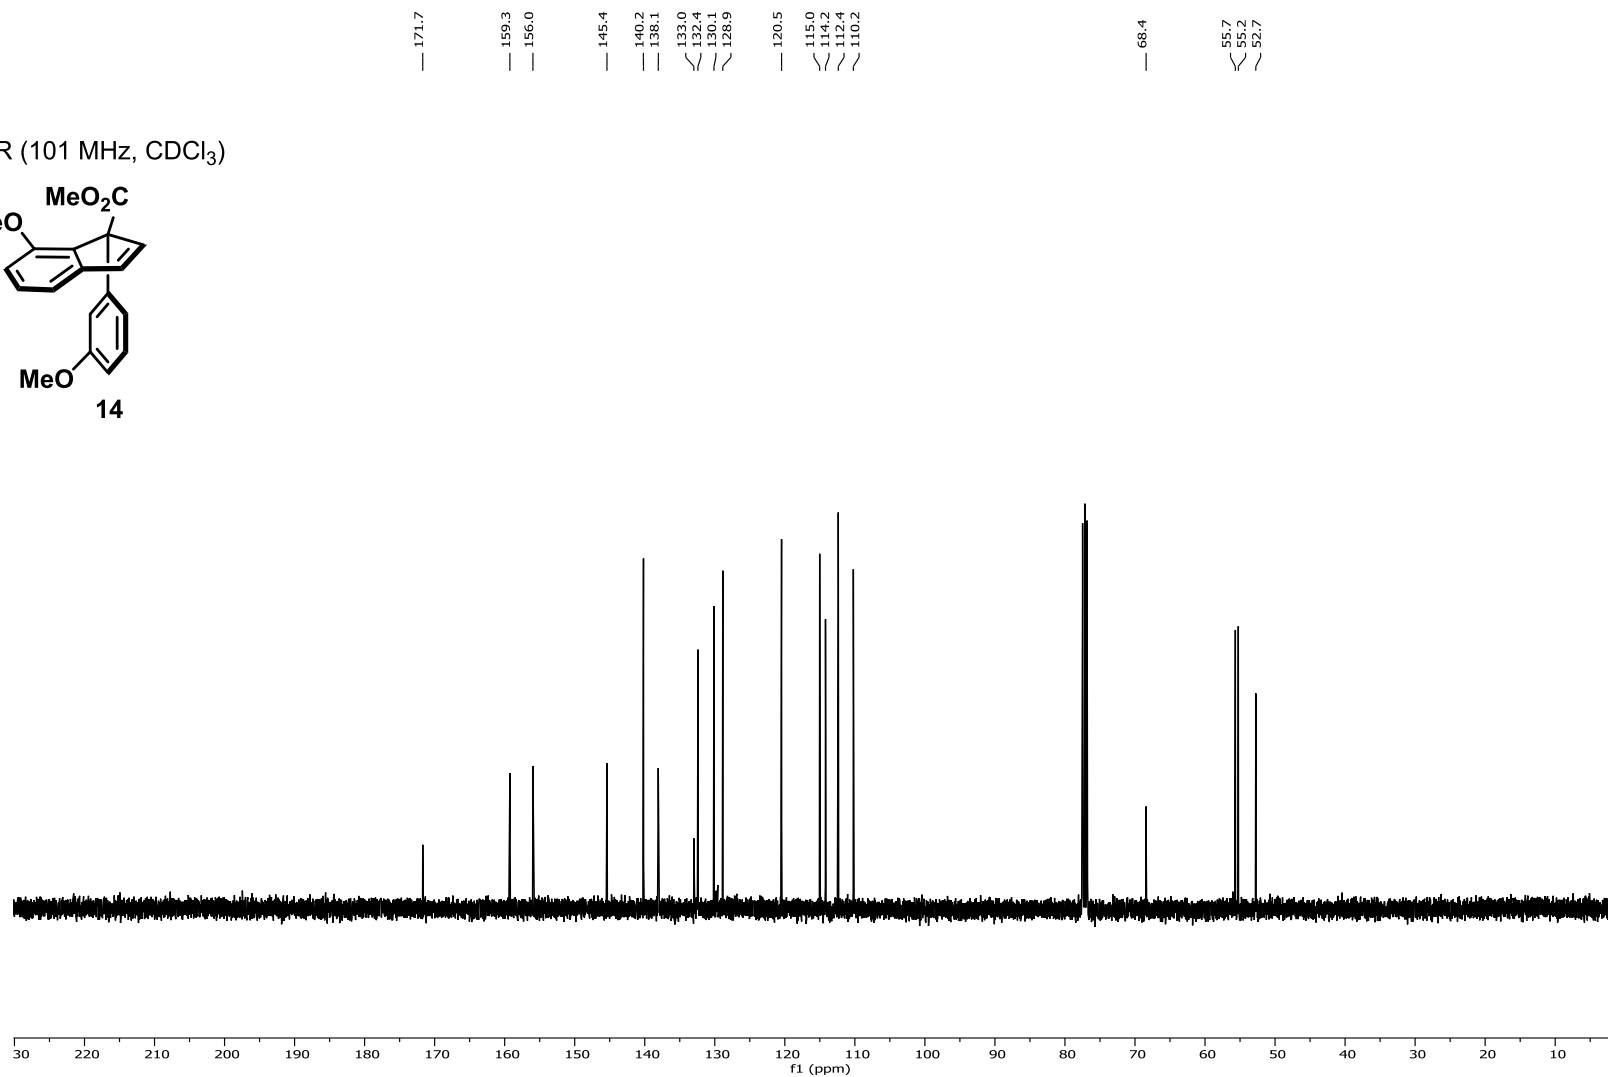

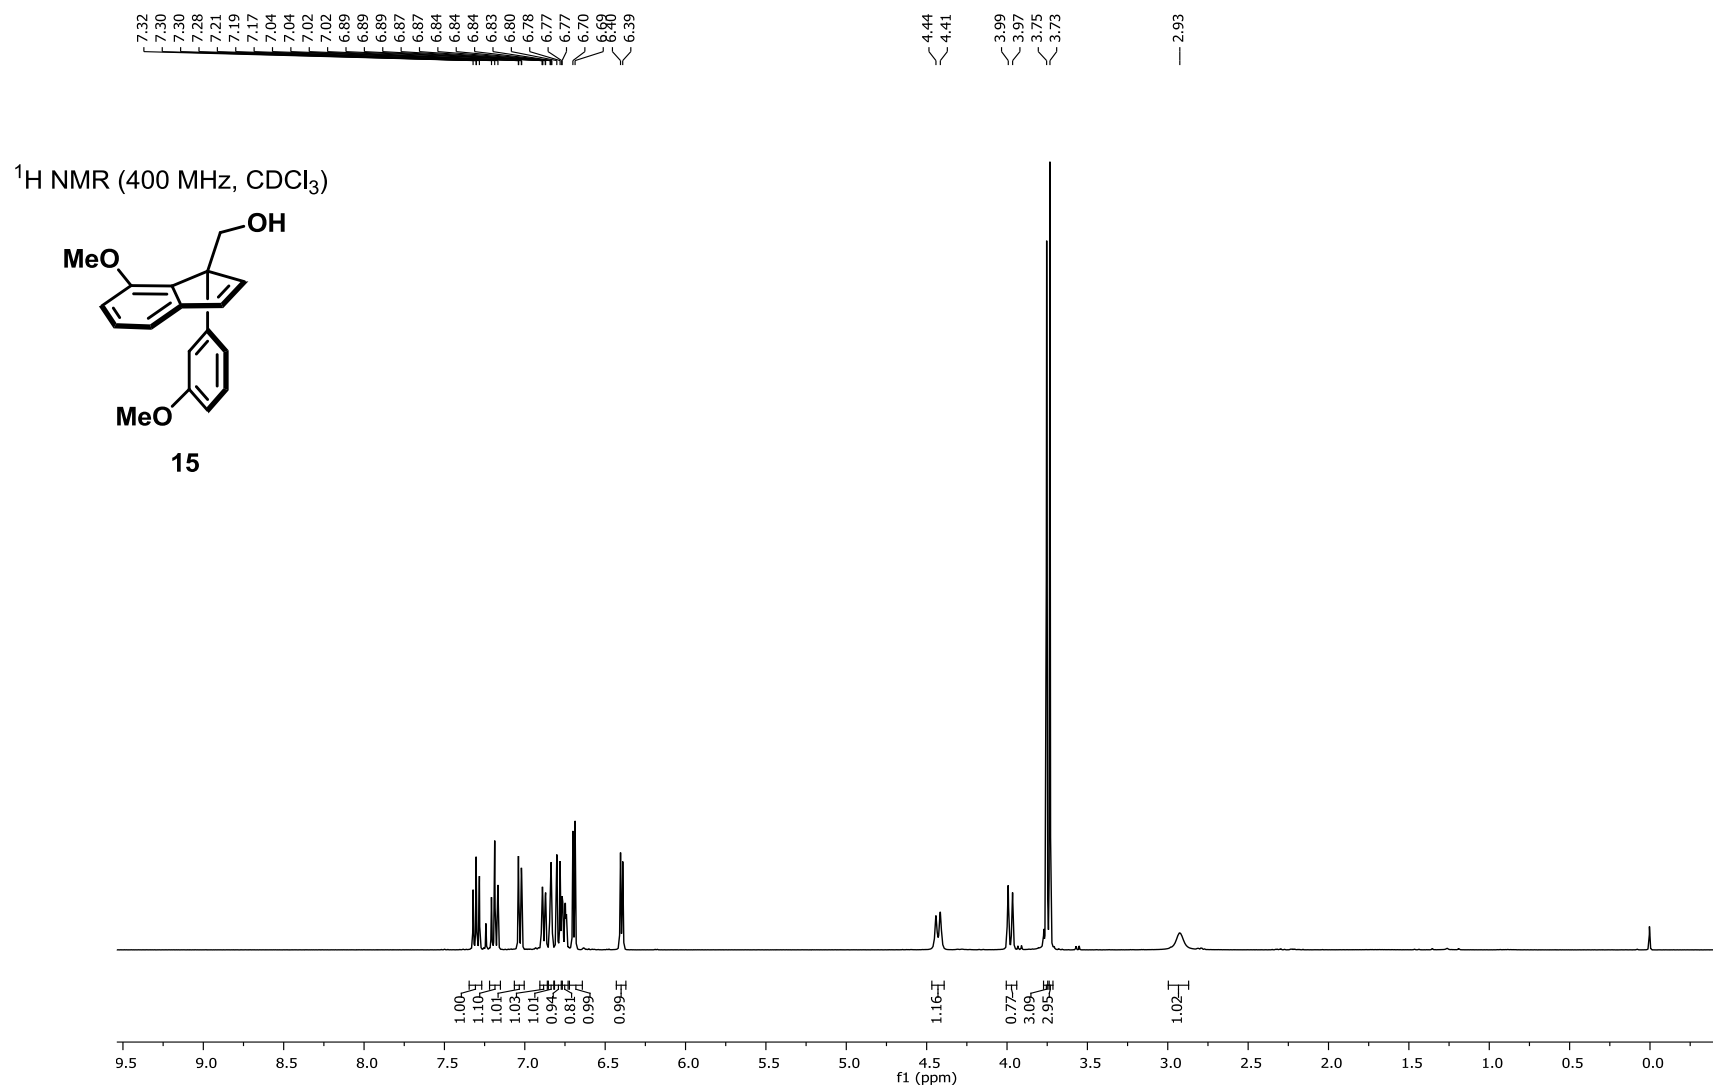

$^{13}\text{C}$  NMR (101 MHz,  $\text{CDCl}_3$ )

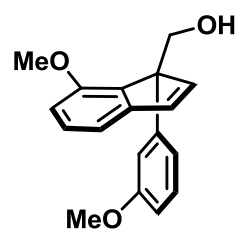

**15**

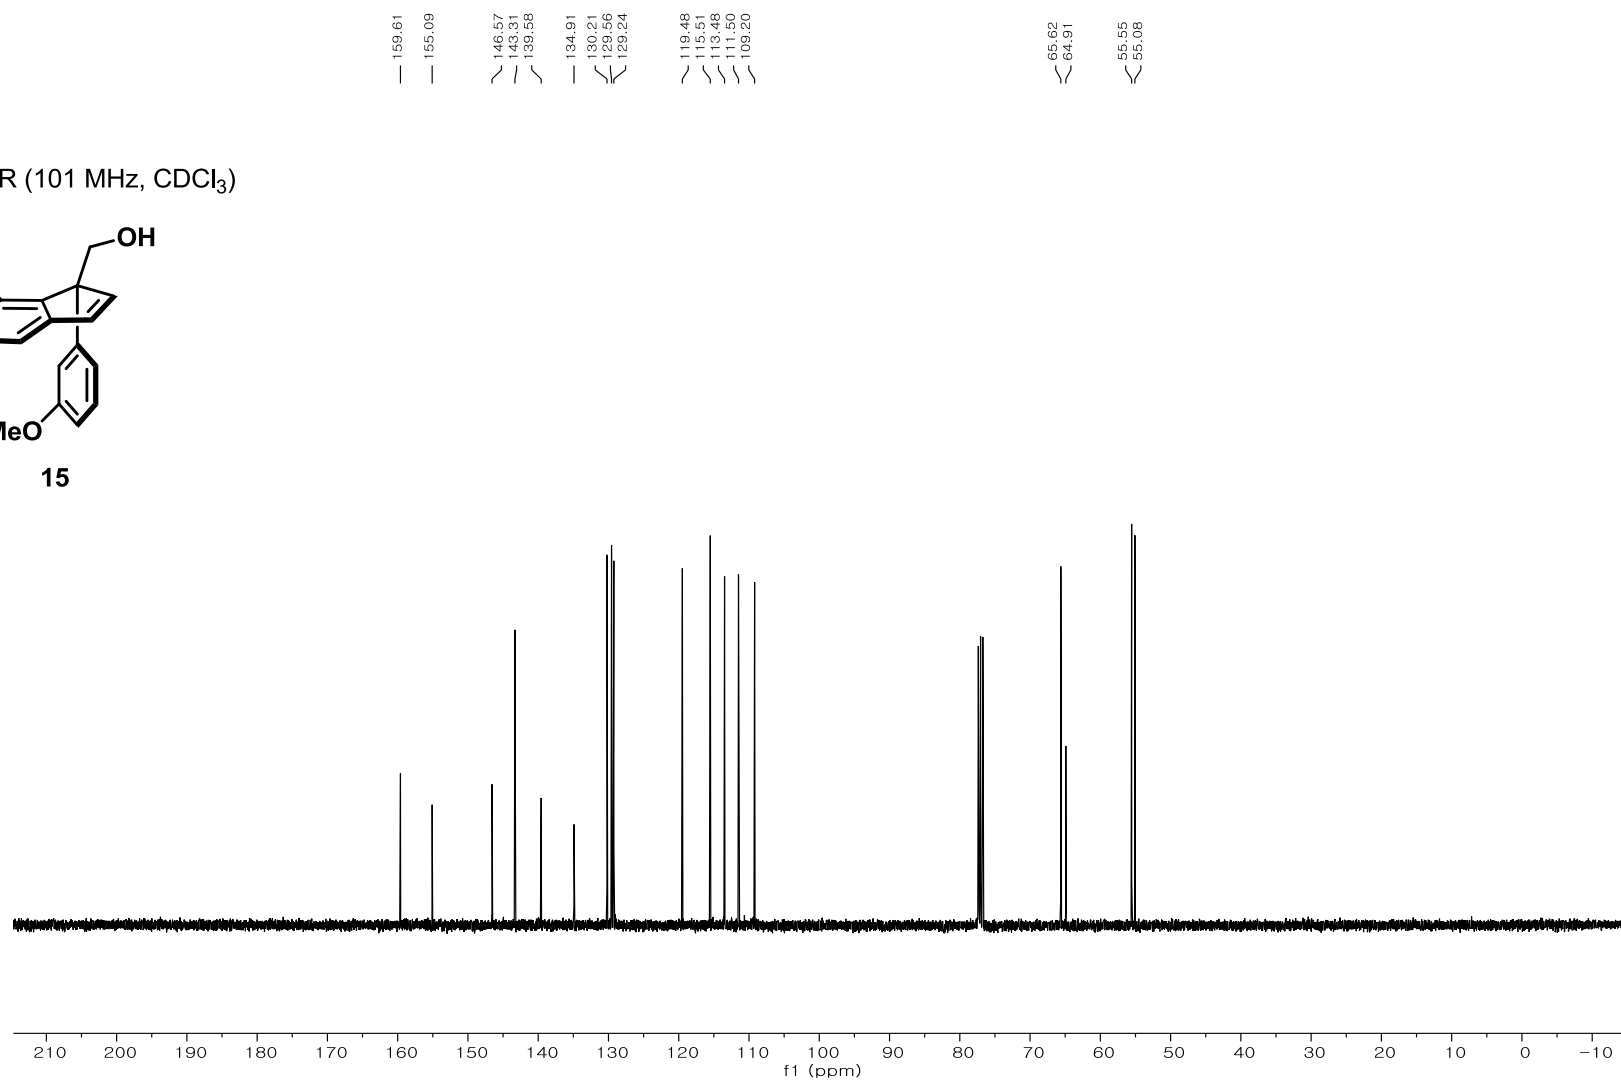

<sup>1</sup>H NMR (400 MHz, CDCl<sub>3</sub>)

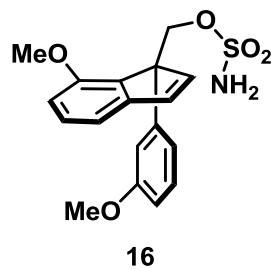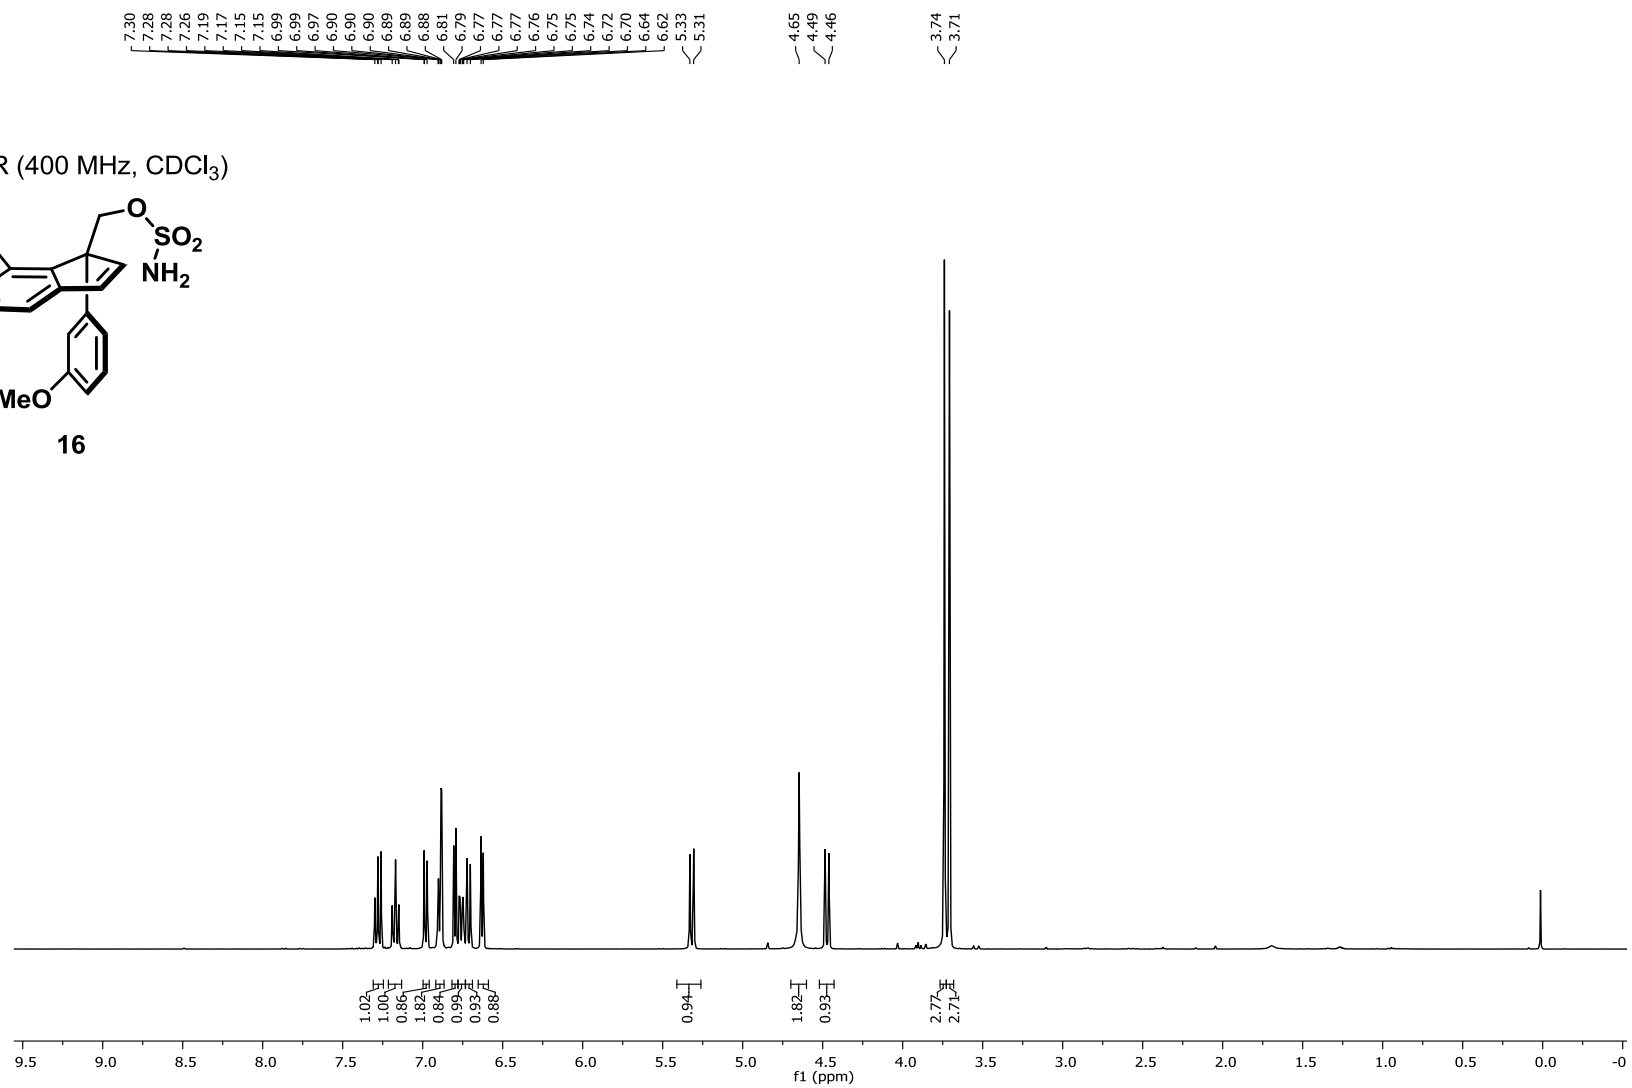

$^{13}\text{C}$  NMR (101 MHz,  $\text{CDCl}_3$ )

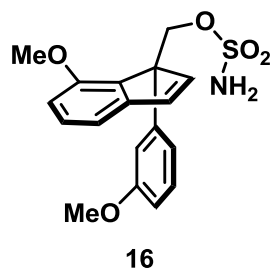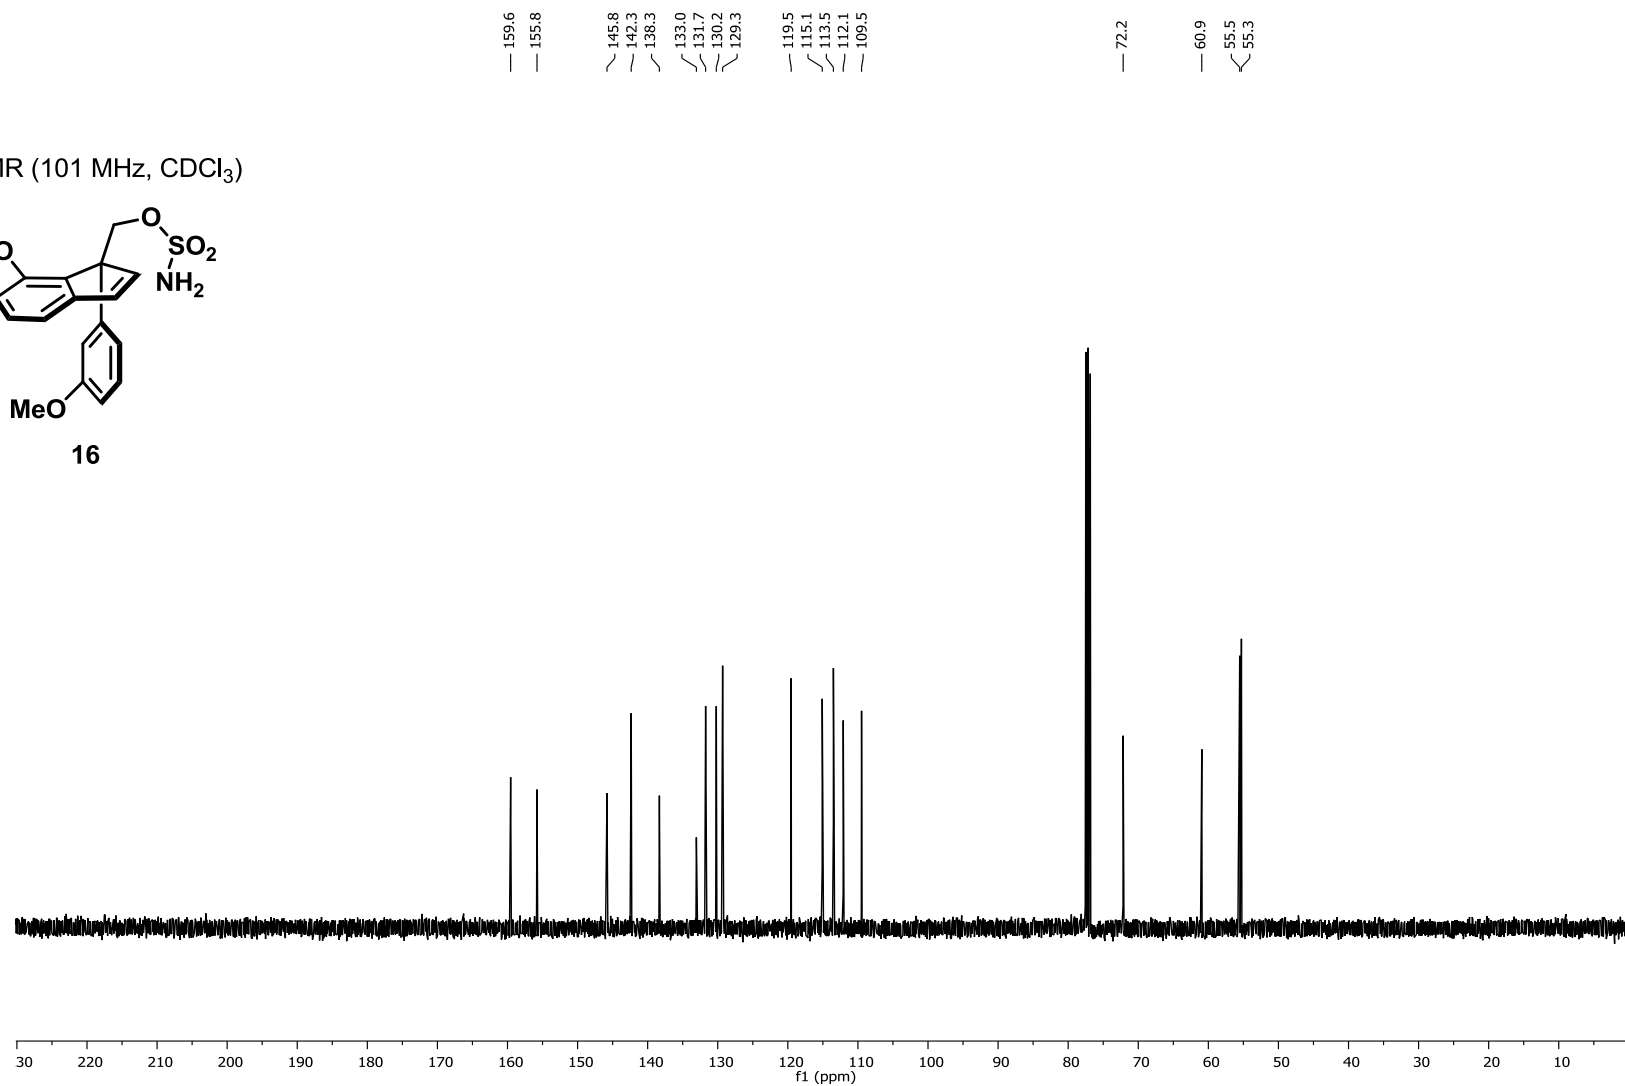



<sup>1</sup>H NMR (400 MHz, CDCl<sub>3</sub>)

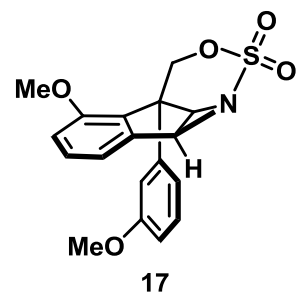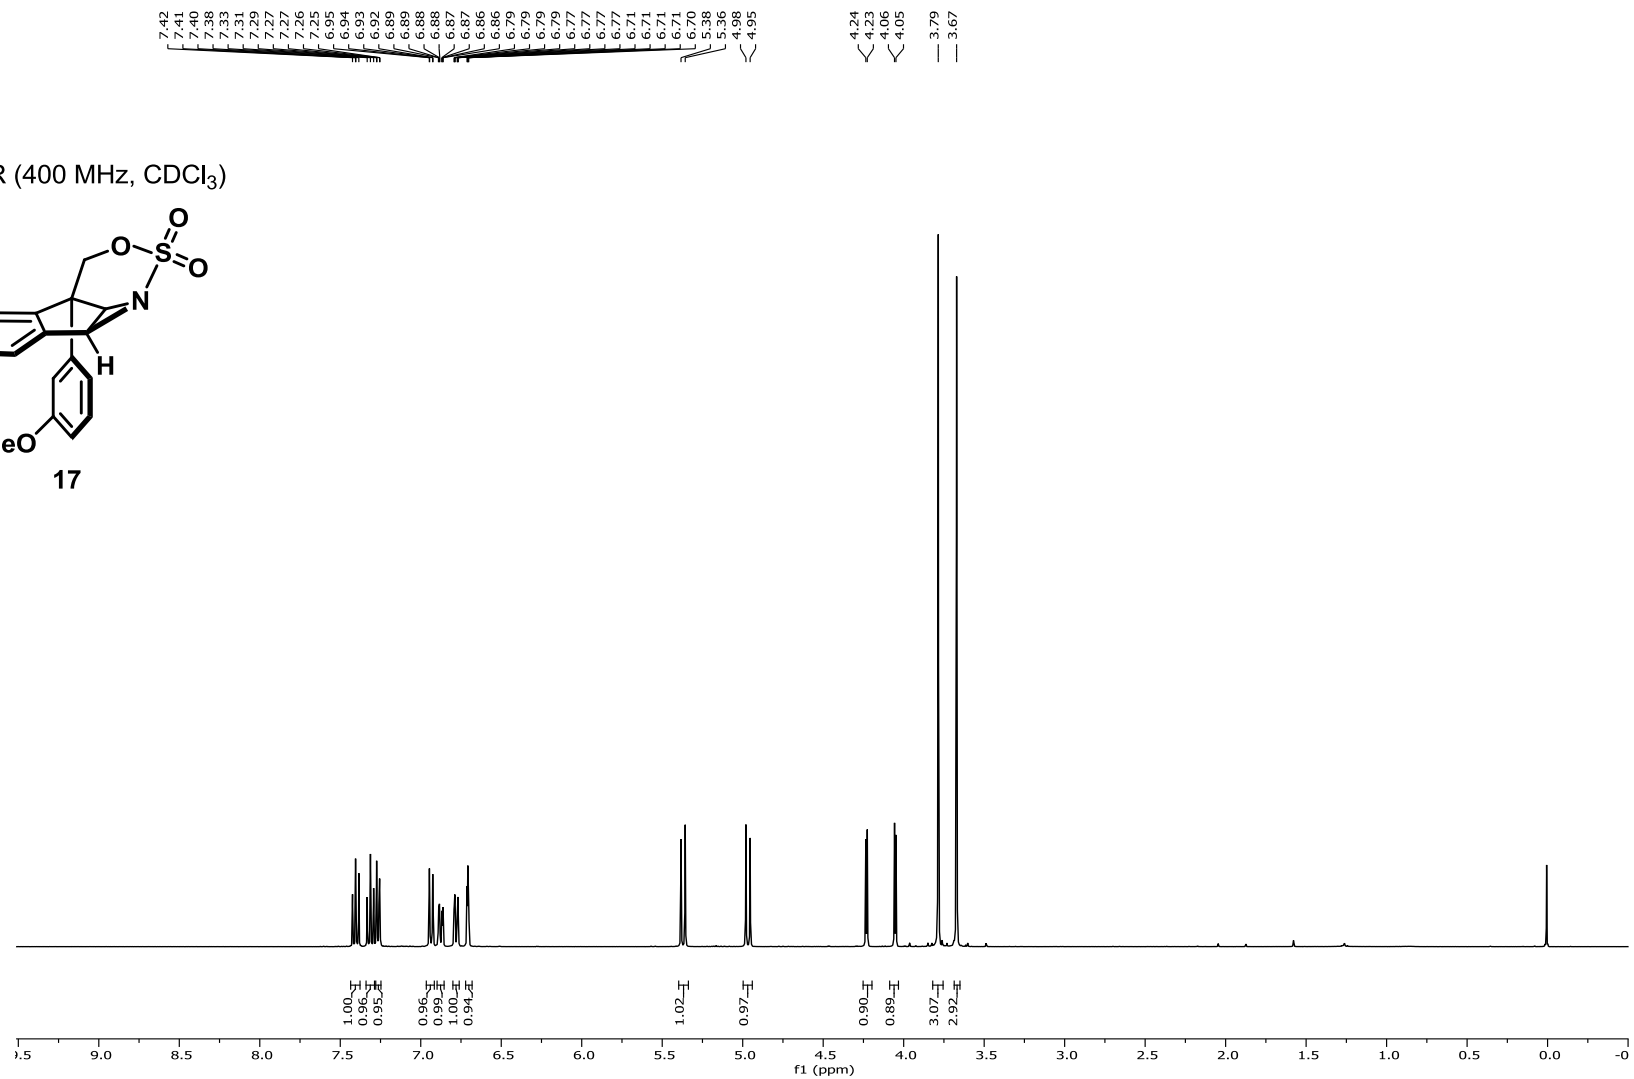

$^{13}\text{C}$  NMR (101 MHz,  $\text{CDCl}_3$ )

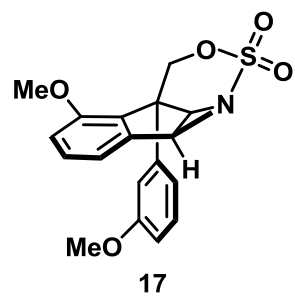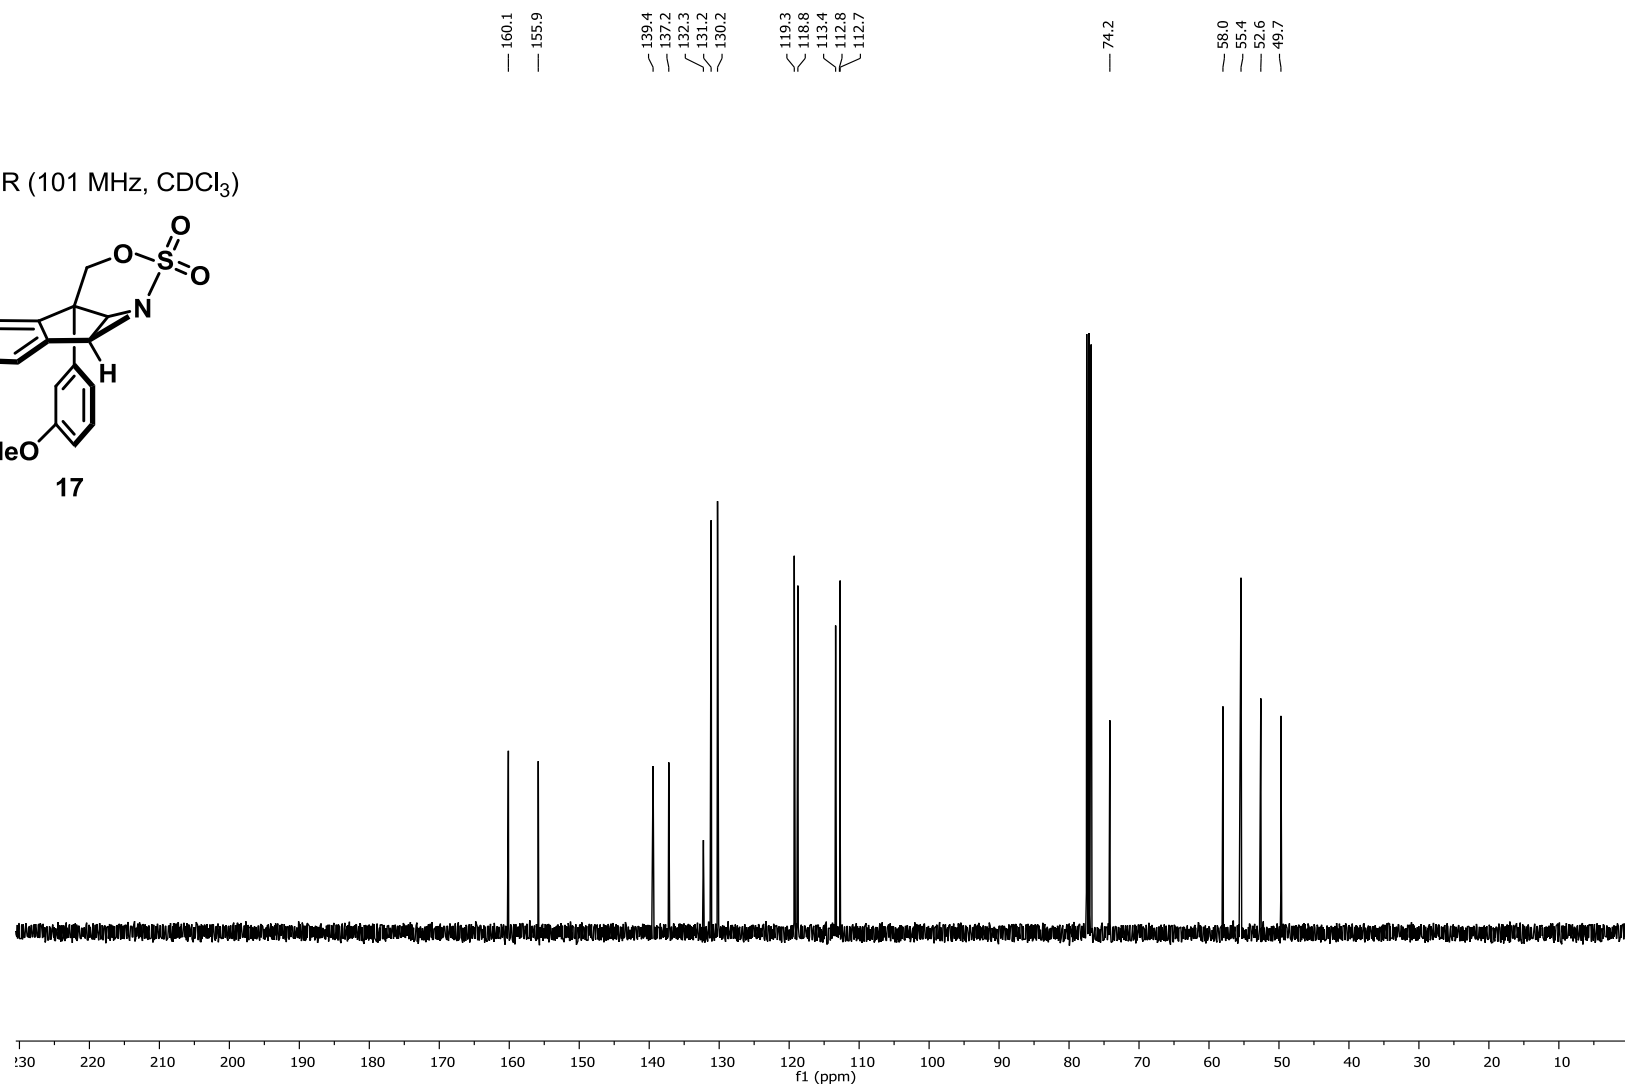

<sup>1</sup>H NMR (400 MHz, CDCl<sub>3</sub>)

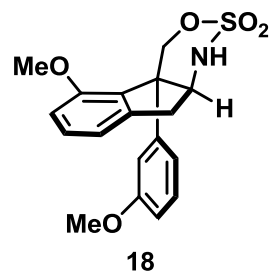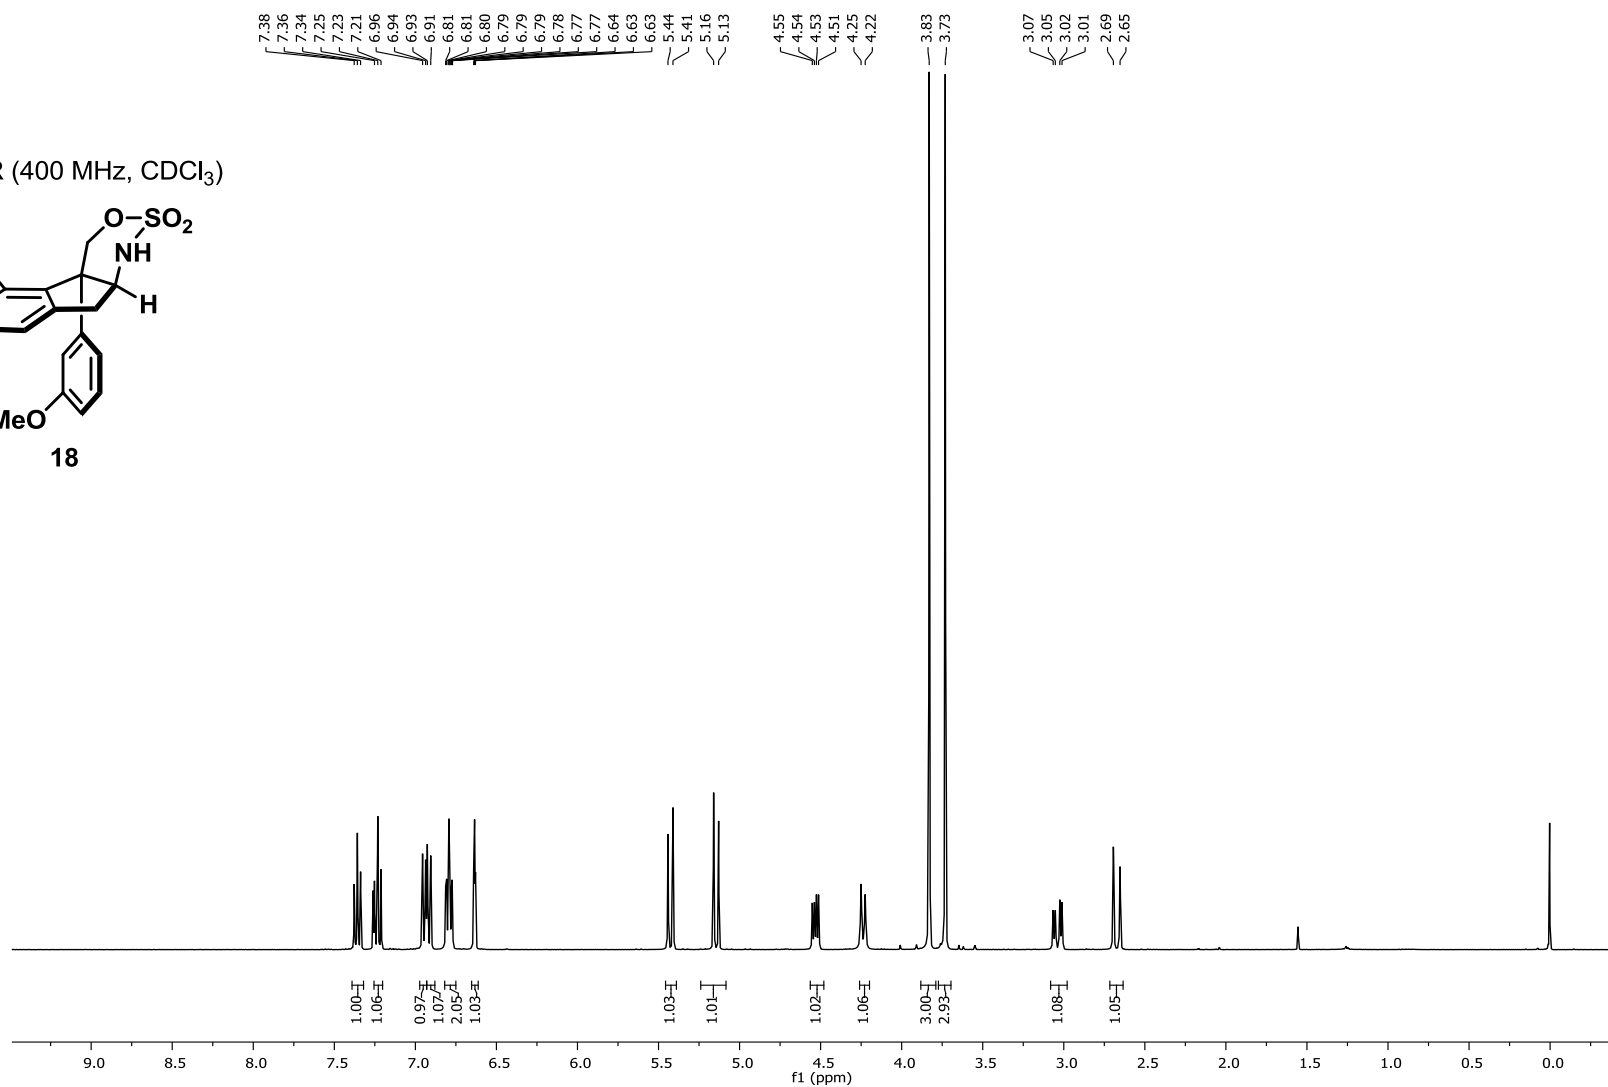

$^{13}\text{C}$  NMR (101 MHz,  $\text{CDCl}_3$ )

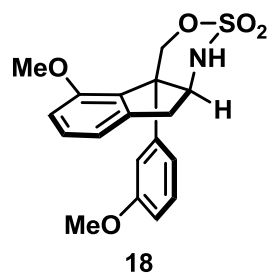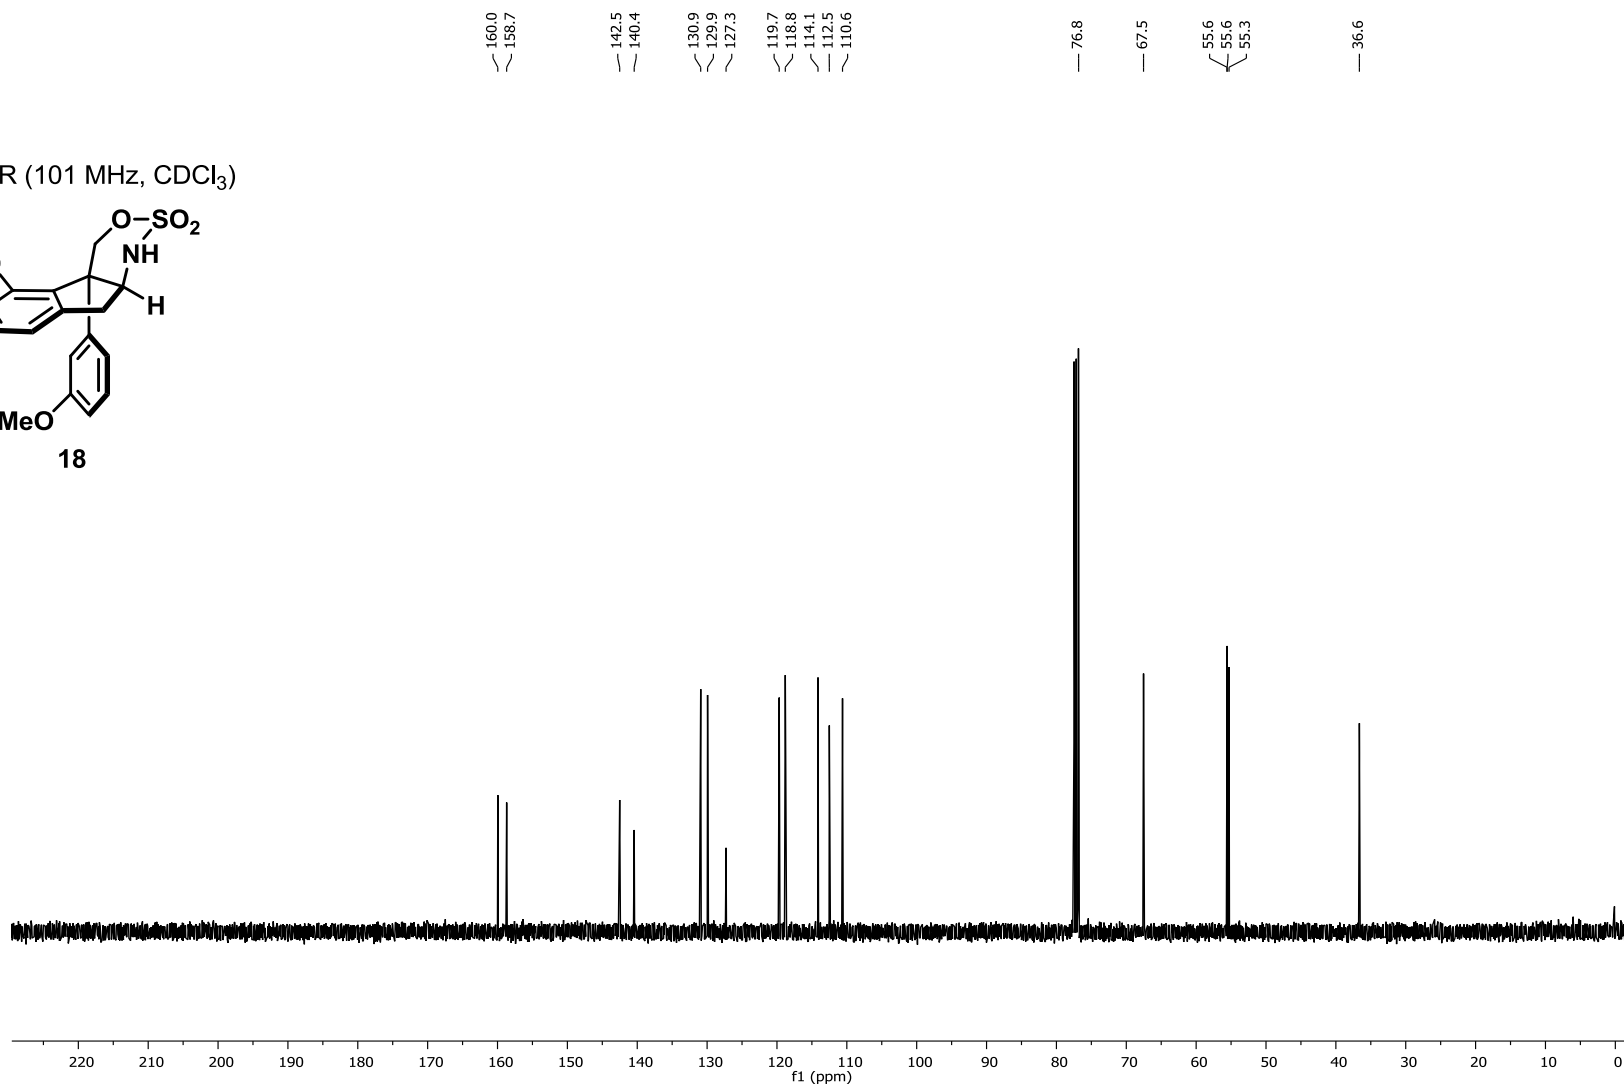

<sup>1</sup>H NMR (400 MHz, CDCl<sub>3</sub>)

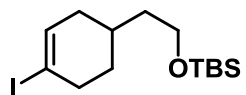

**20**

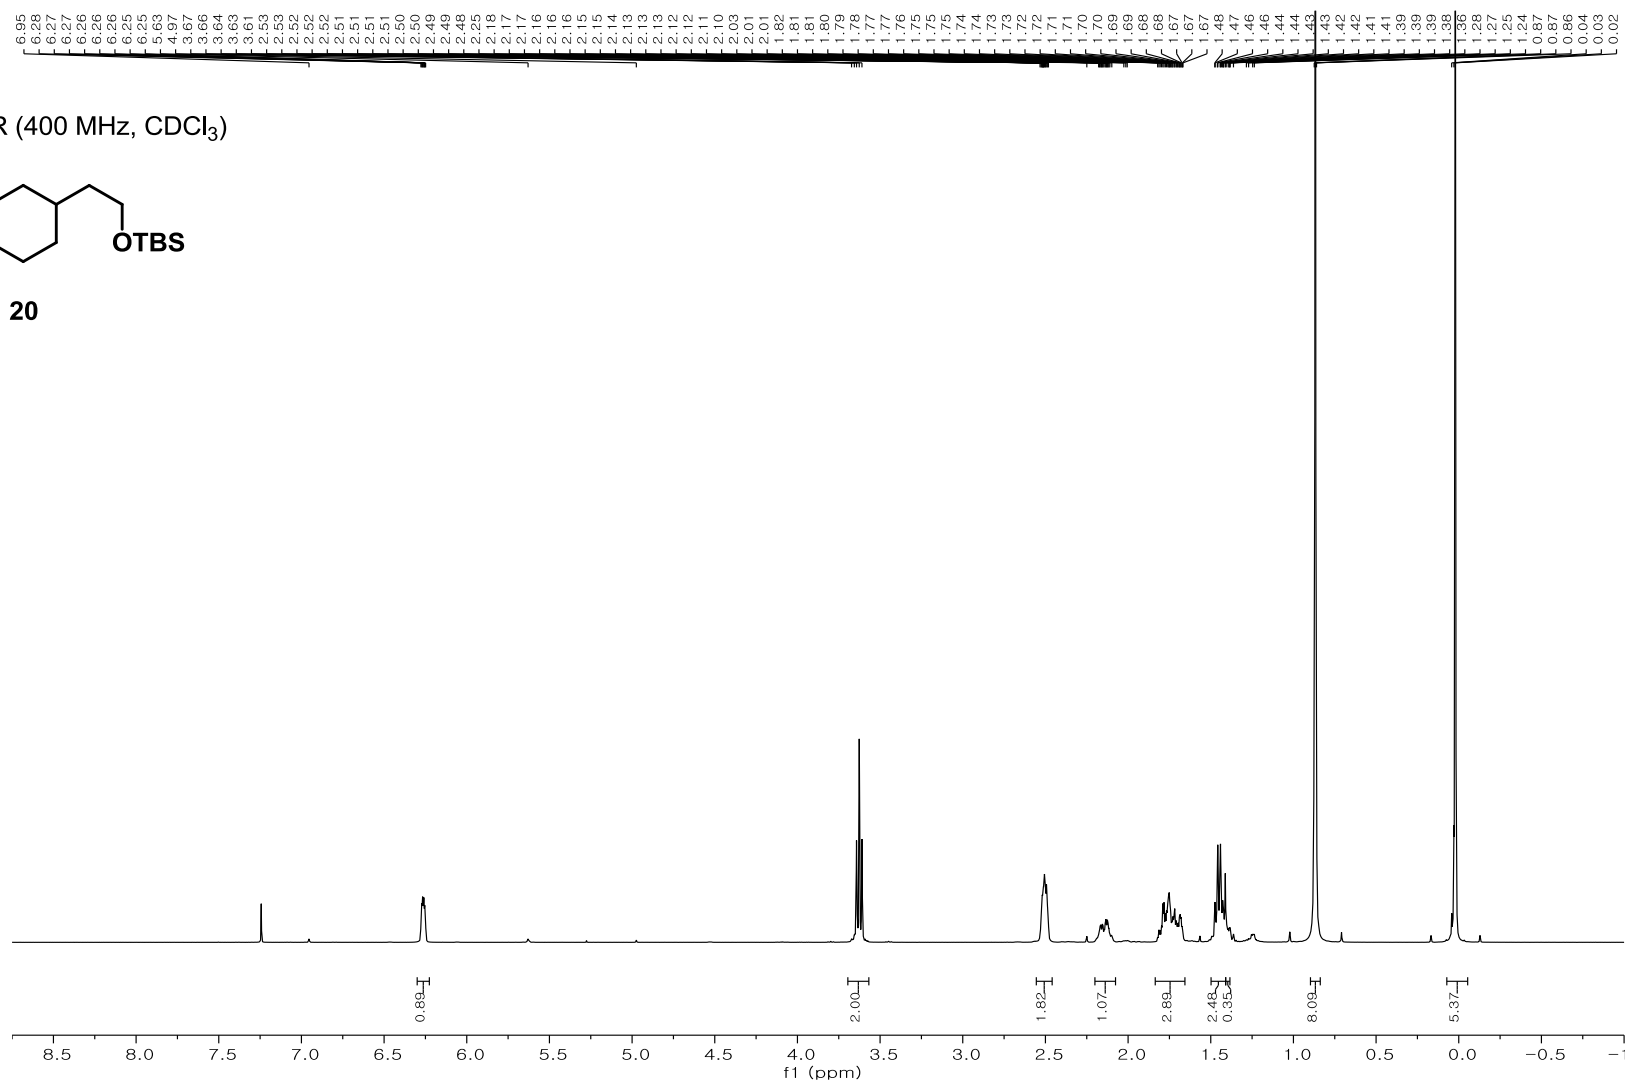

$^{13}\text{C}$  NMR (101 MHz,  $\text{CDCl}_3$ )

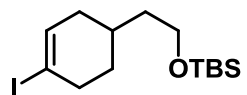

**20**

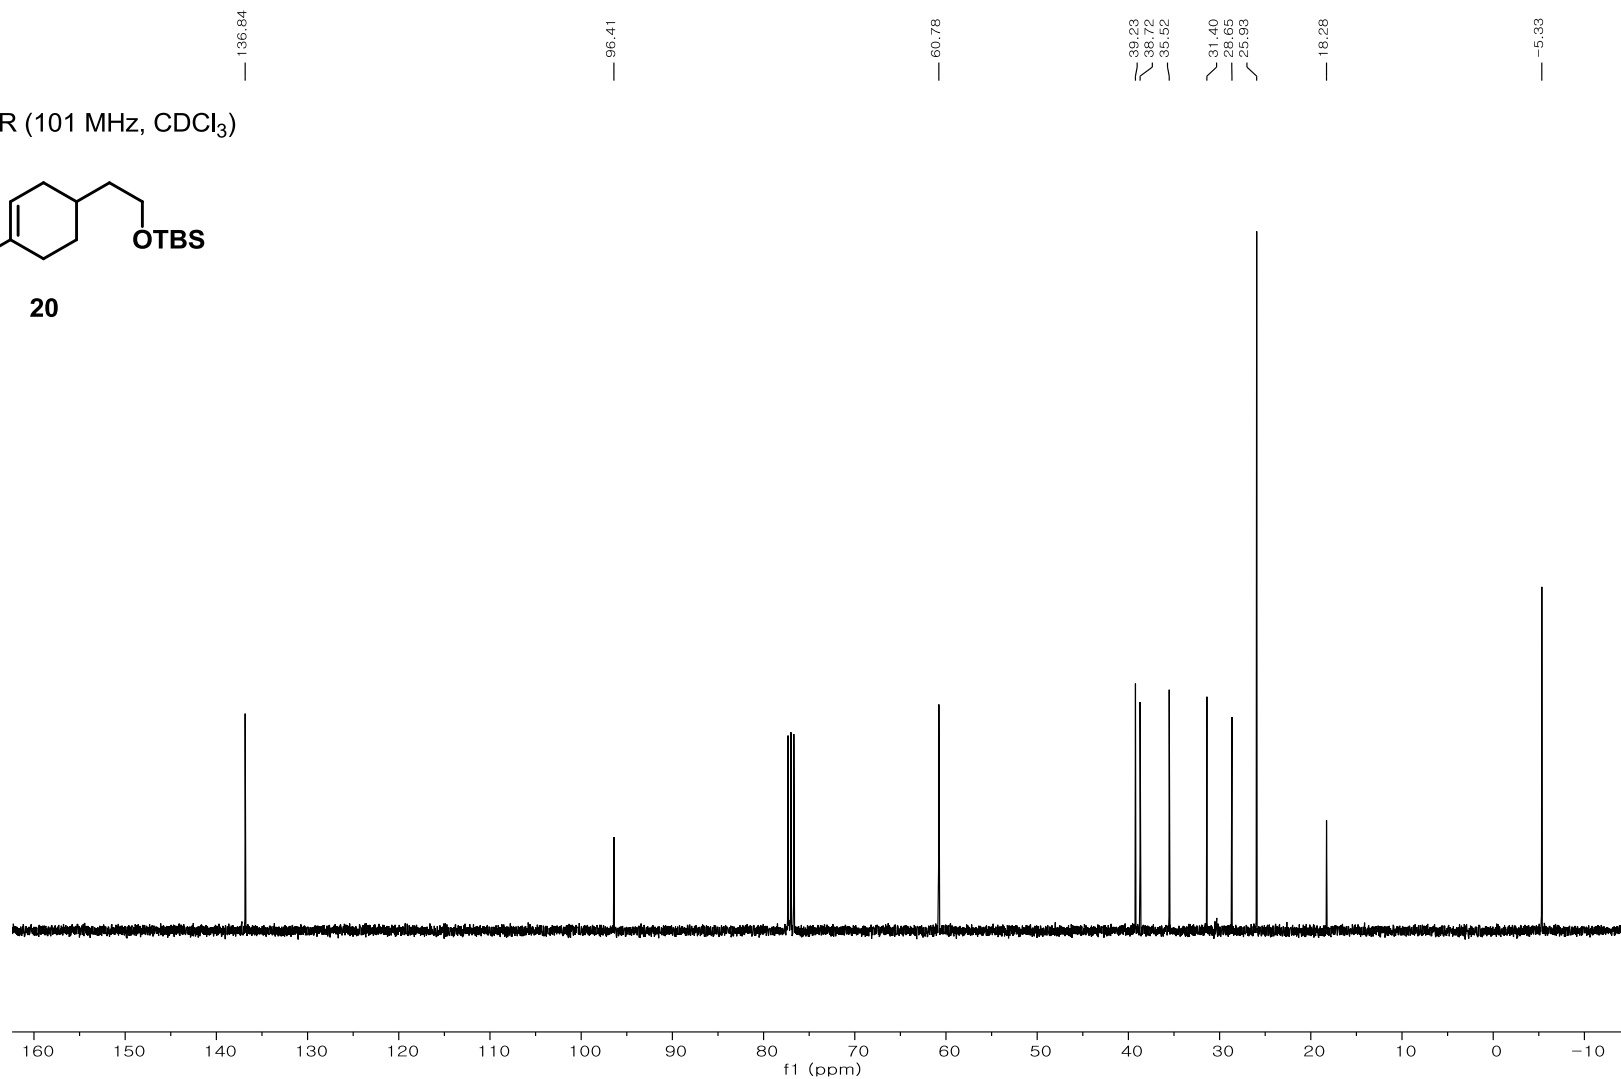

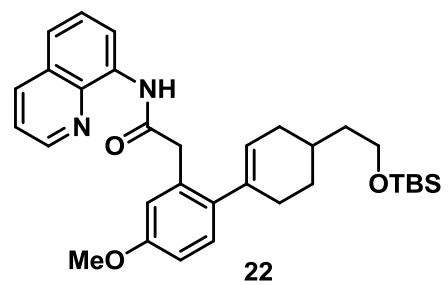

<sup>1</sup>H NMR (400 MHz, CDCl<sub>3</sub>)

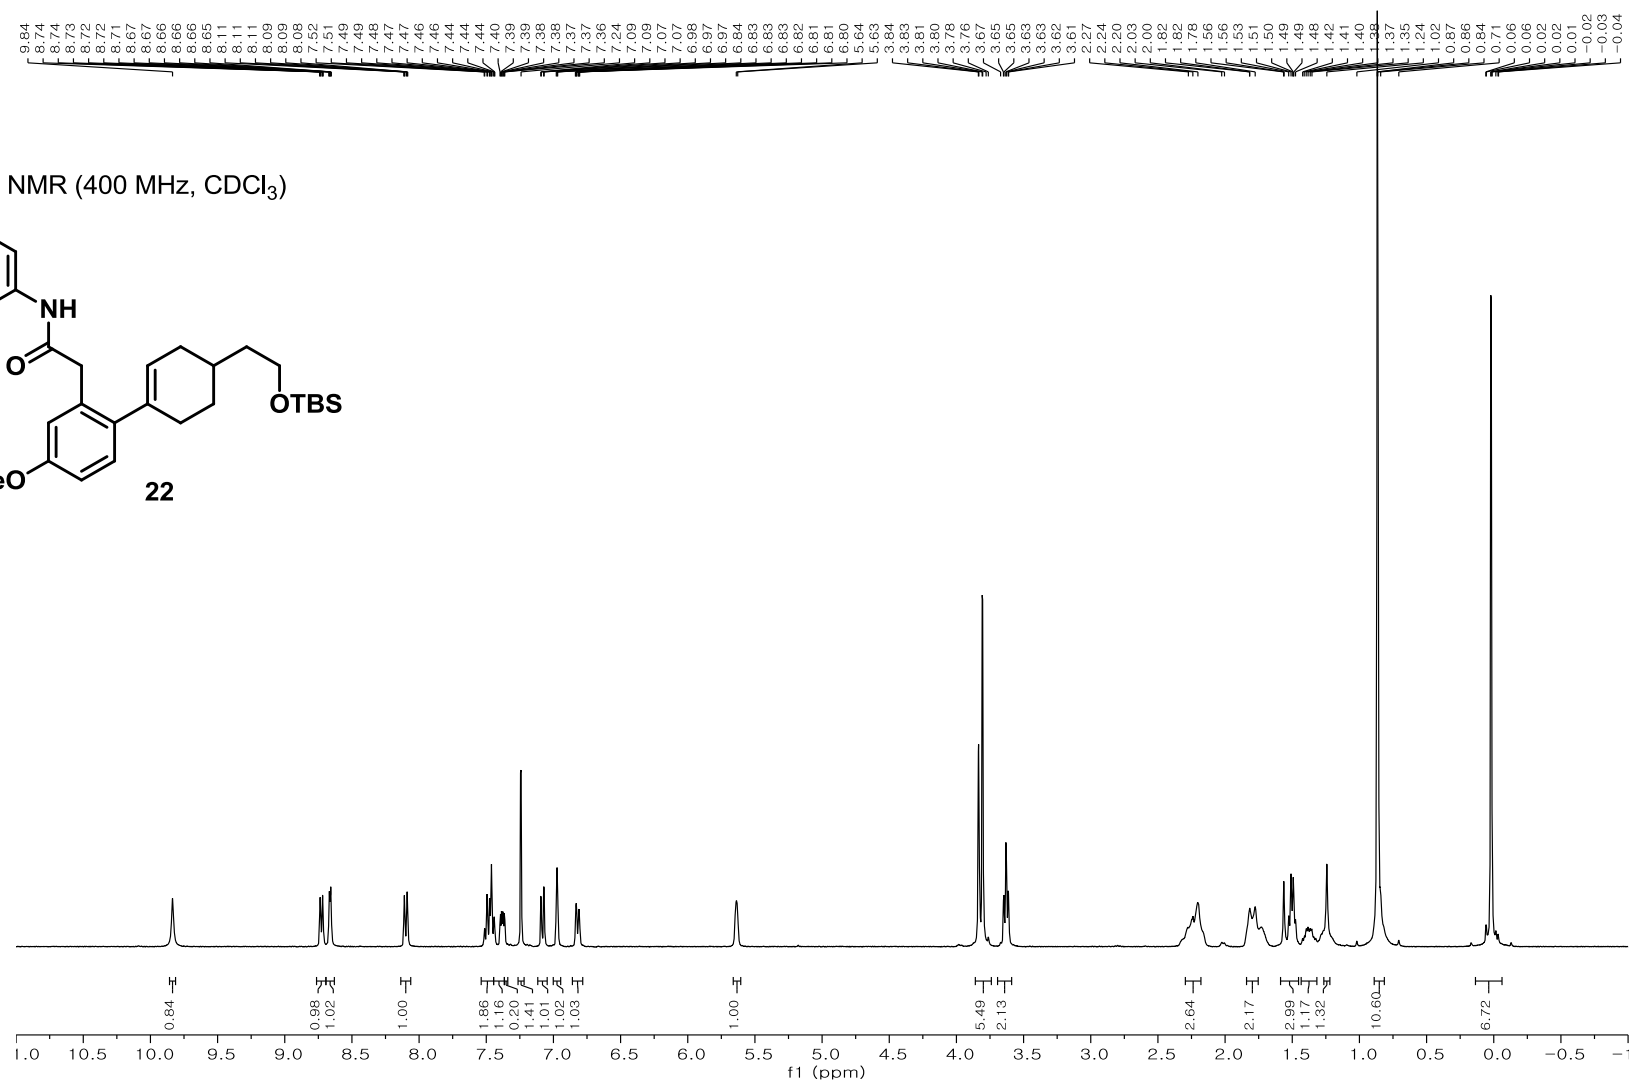

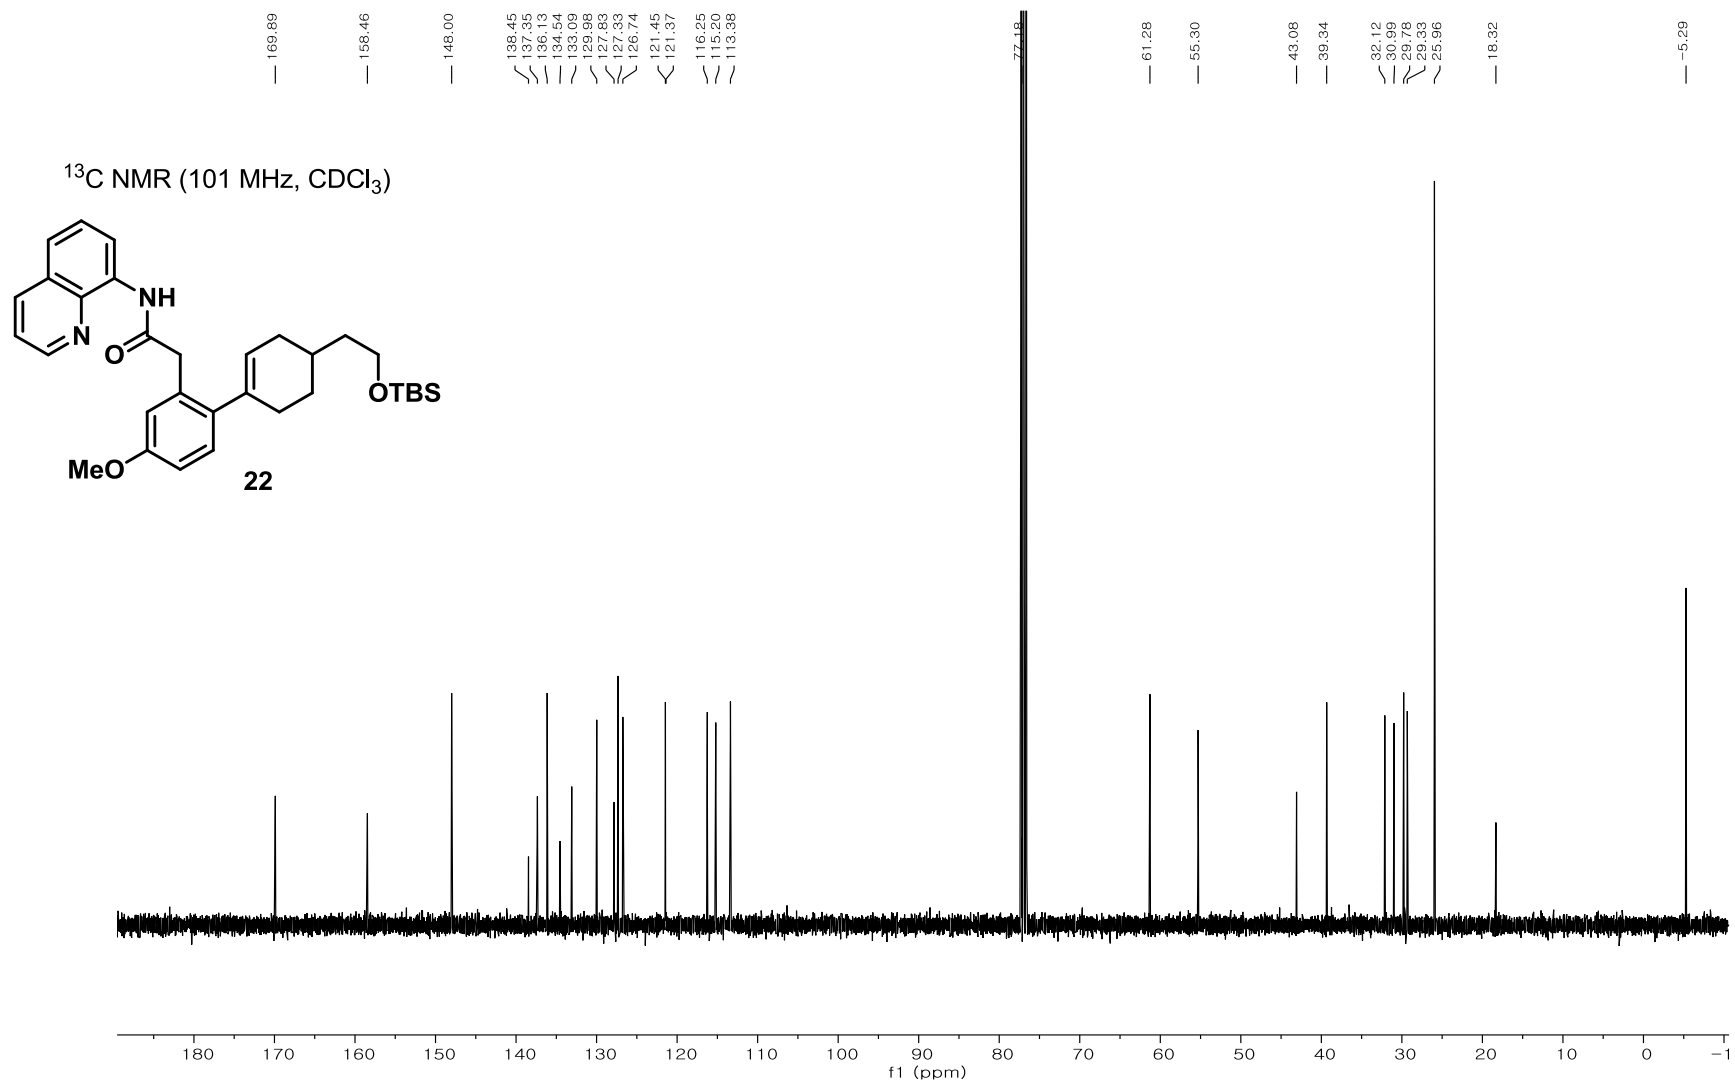



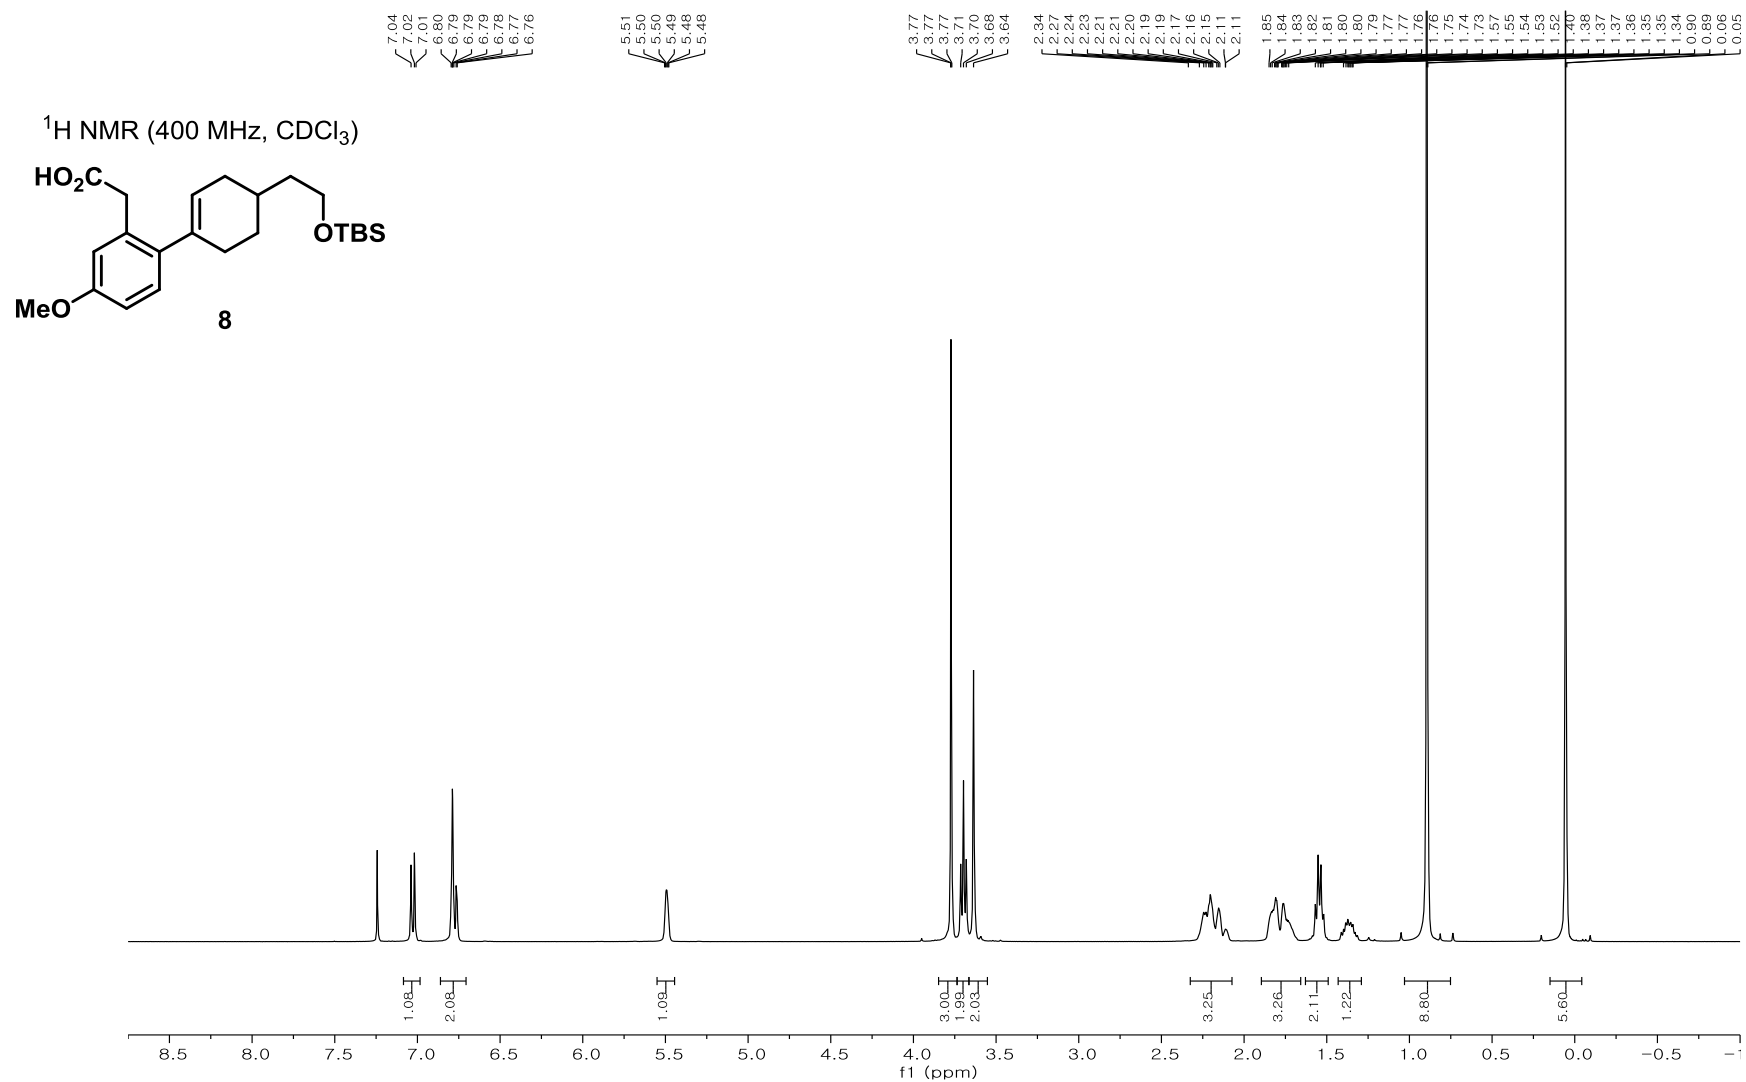

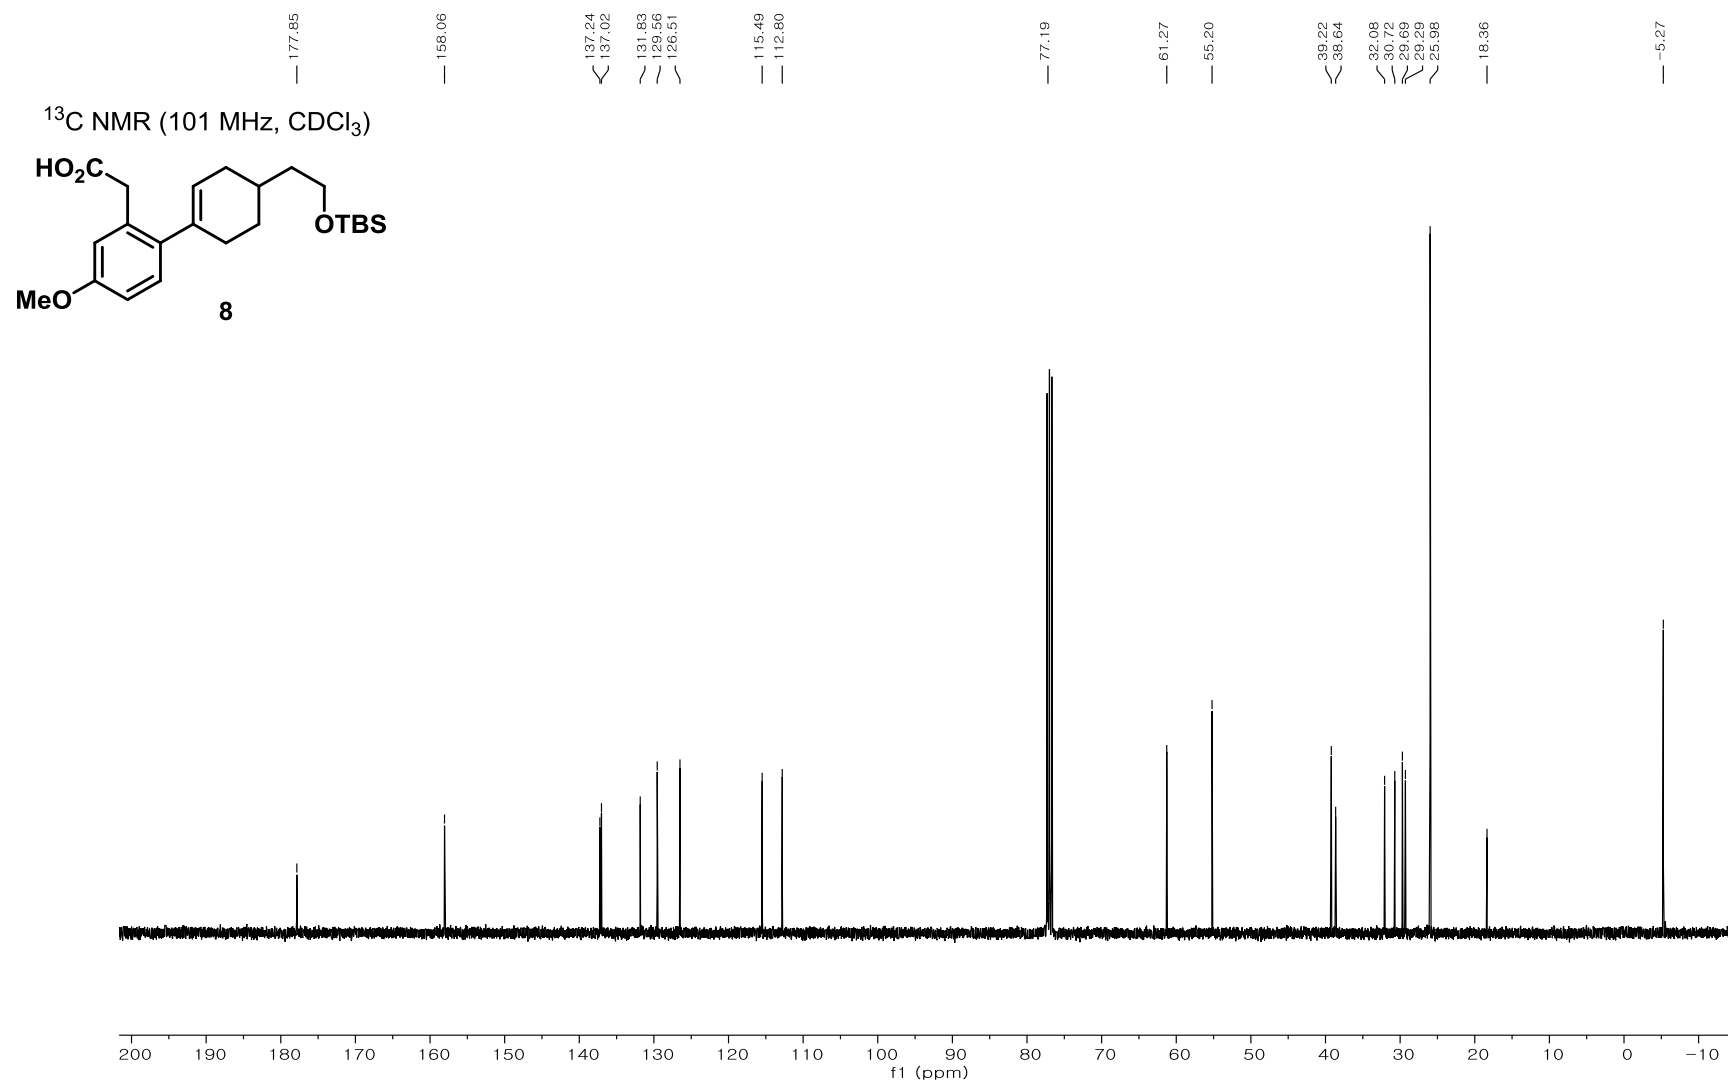

<sup>1</sup>H NMR (400 MHz, CDCl<sub>3</sub>)

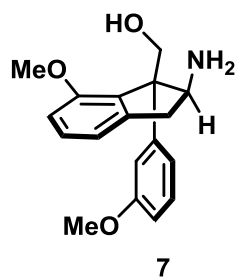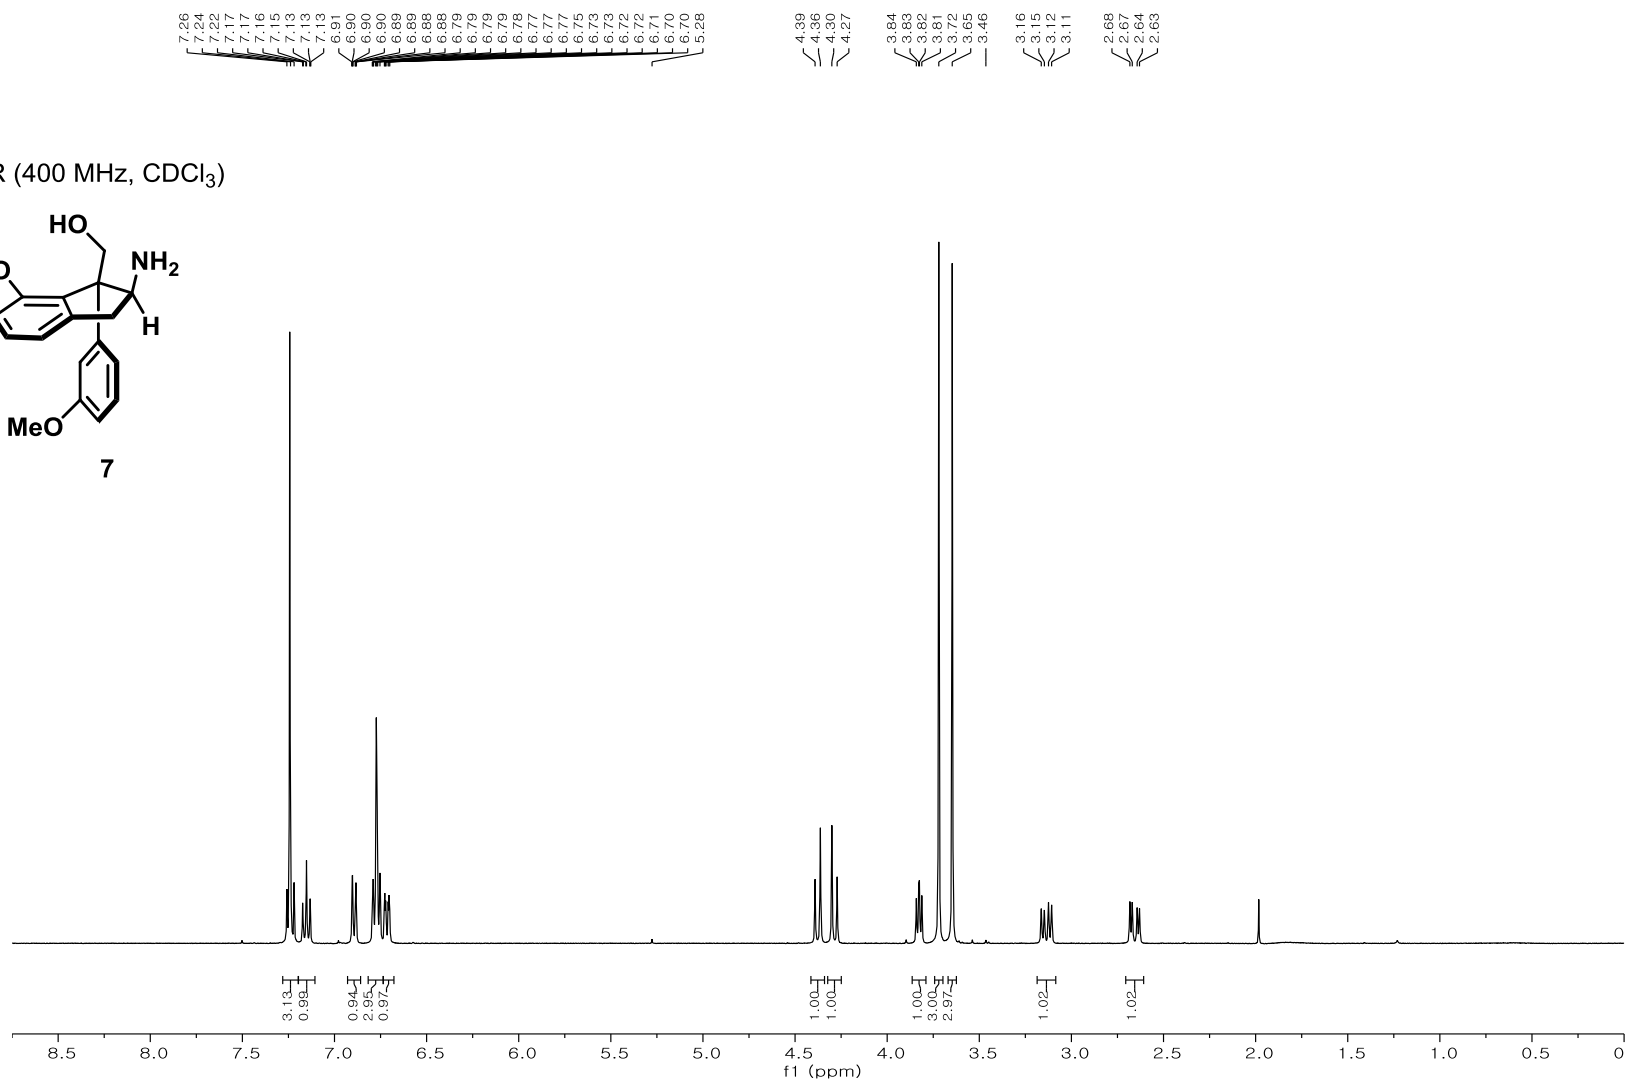

$^{13}\text{C}$  NMR (101 MHz,  $\text{CDCl}_3$ )

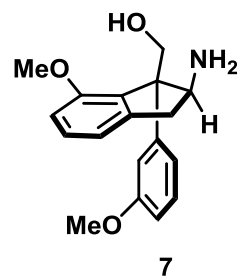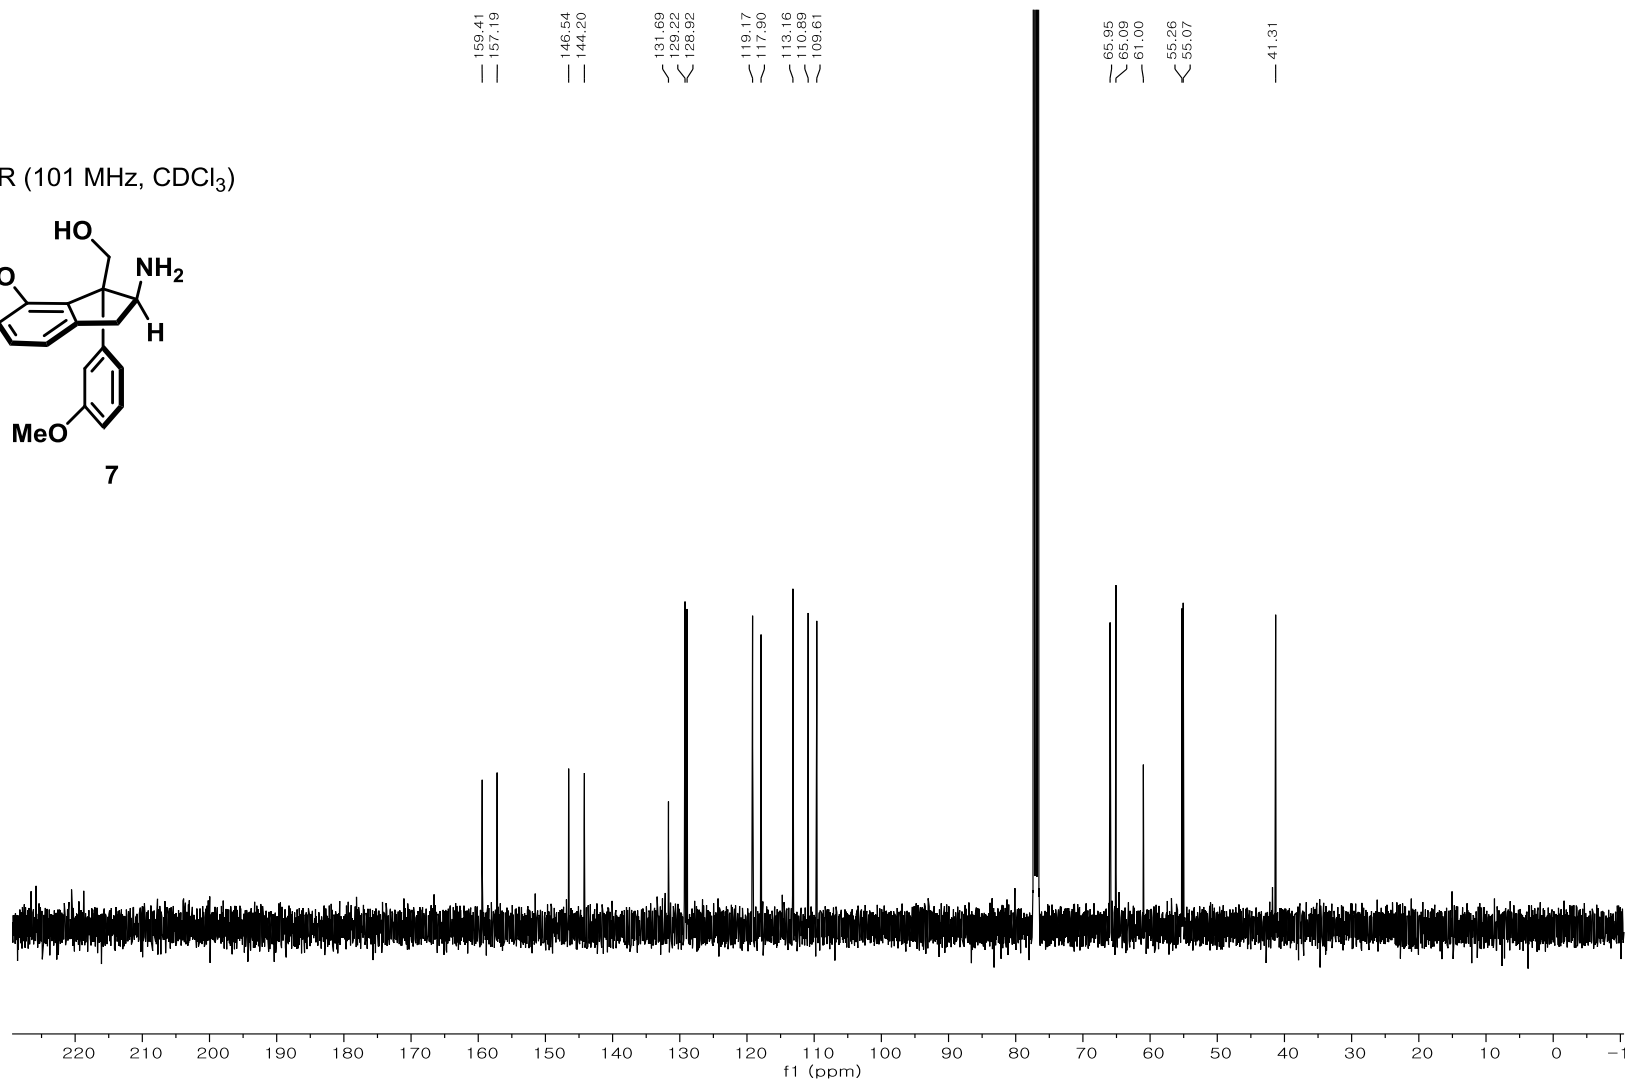

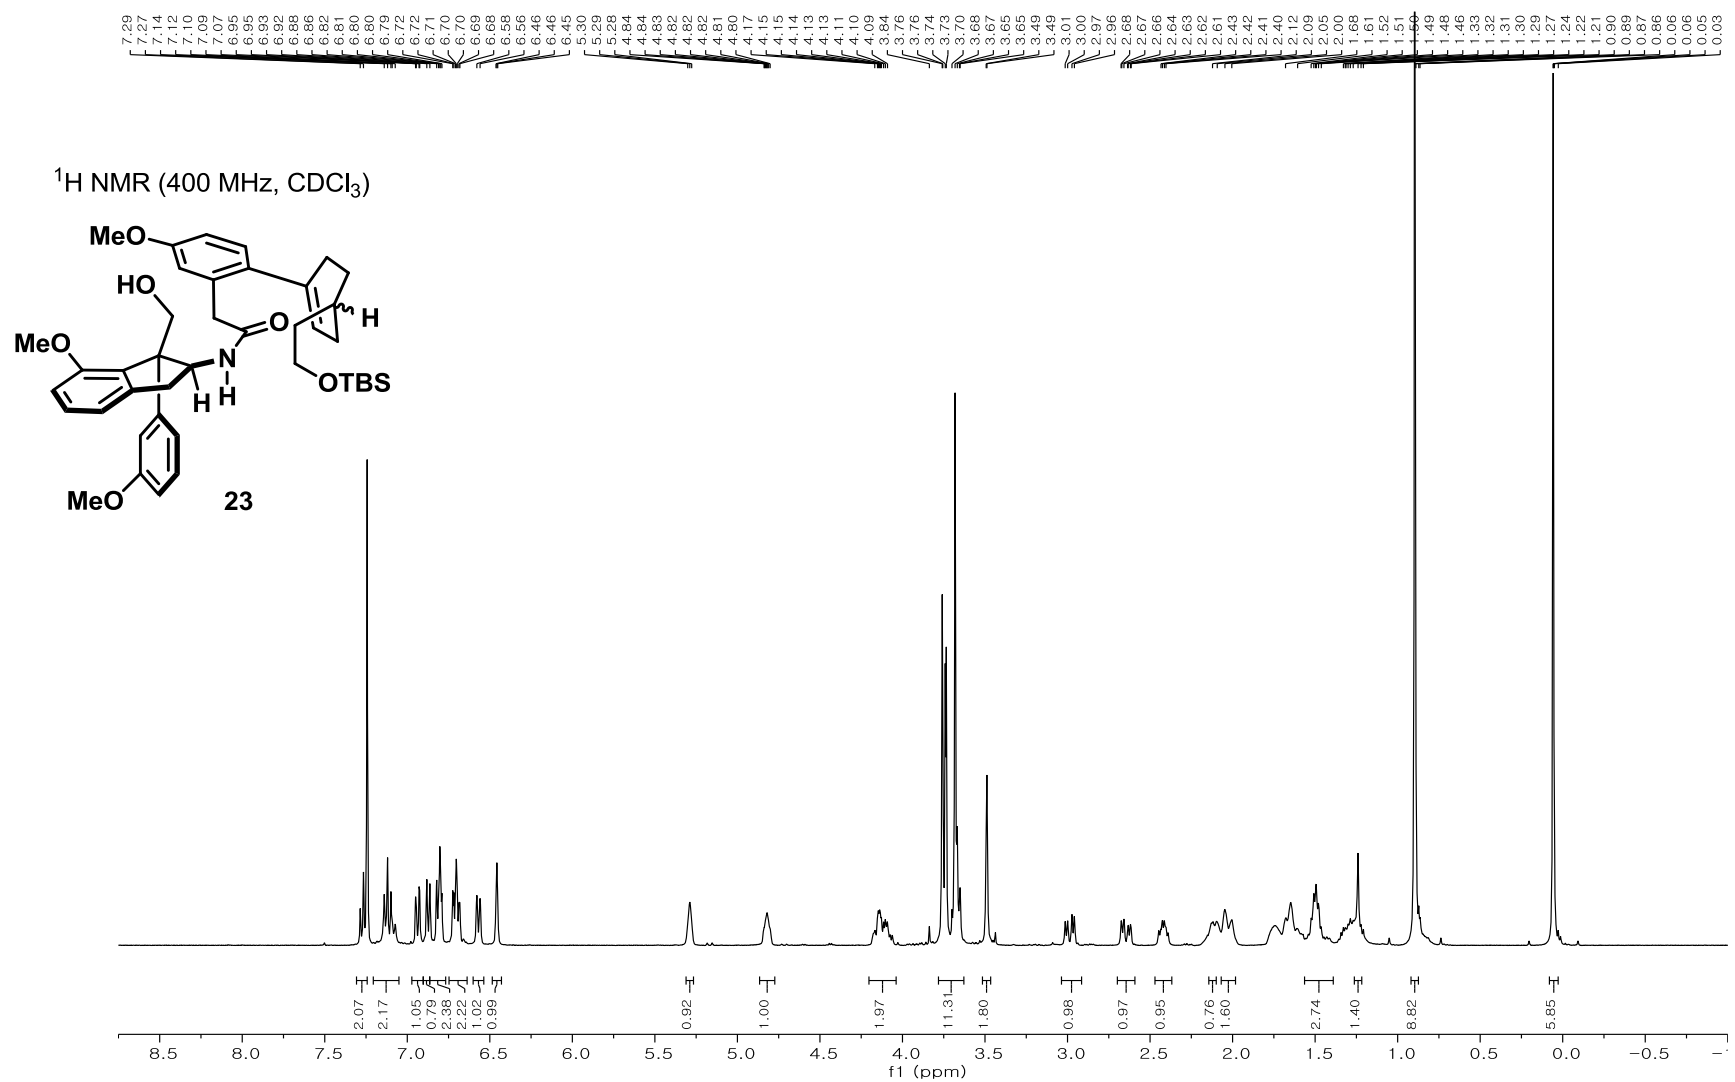

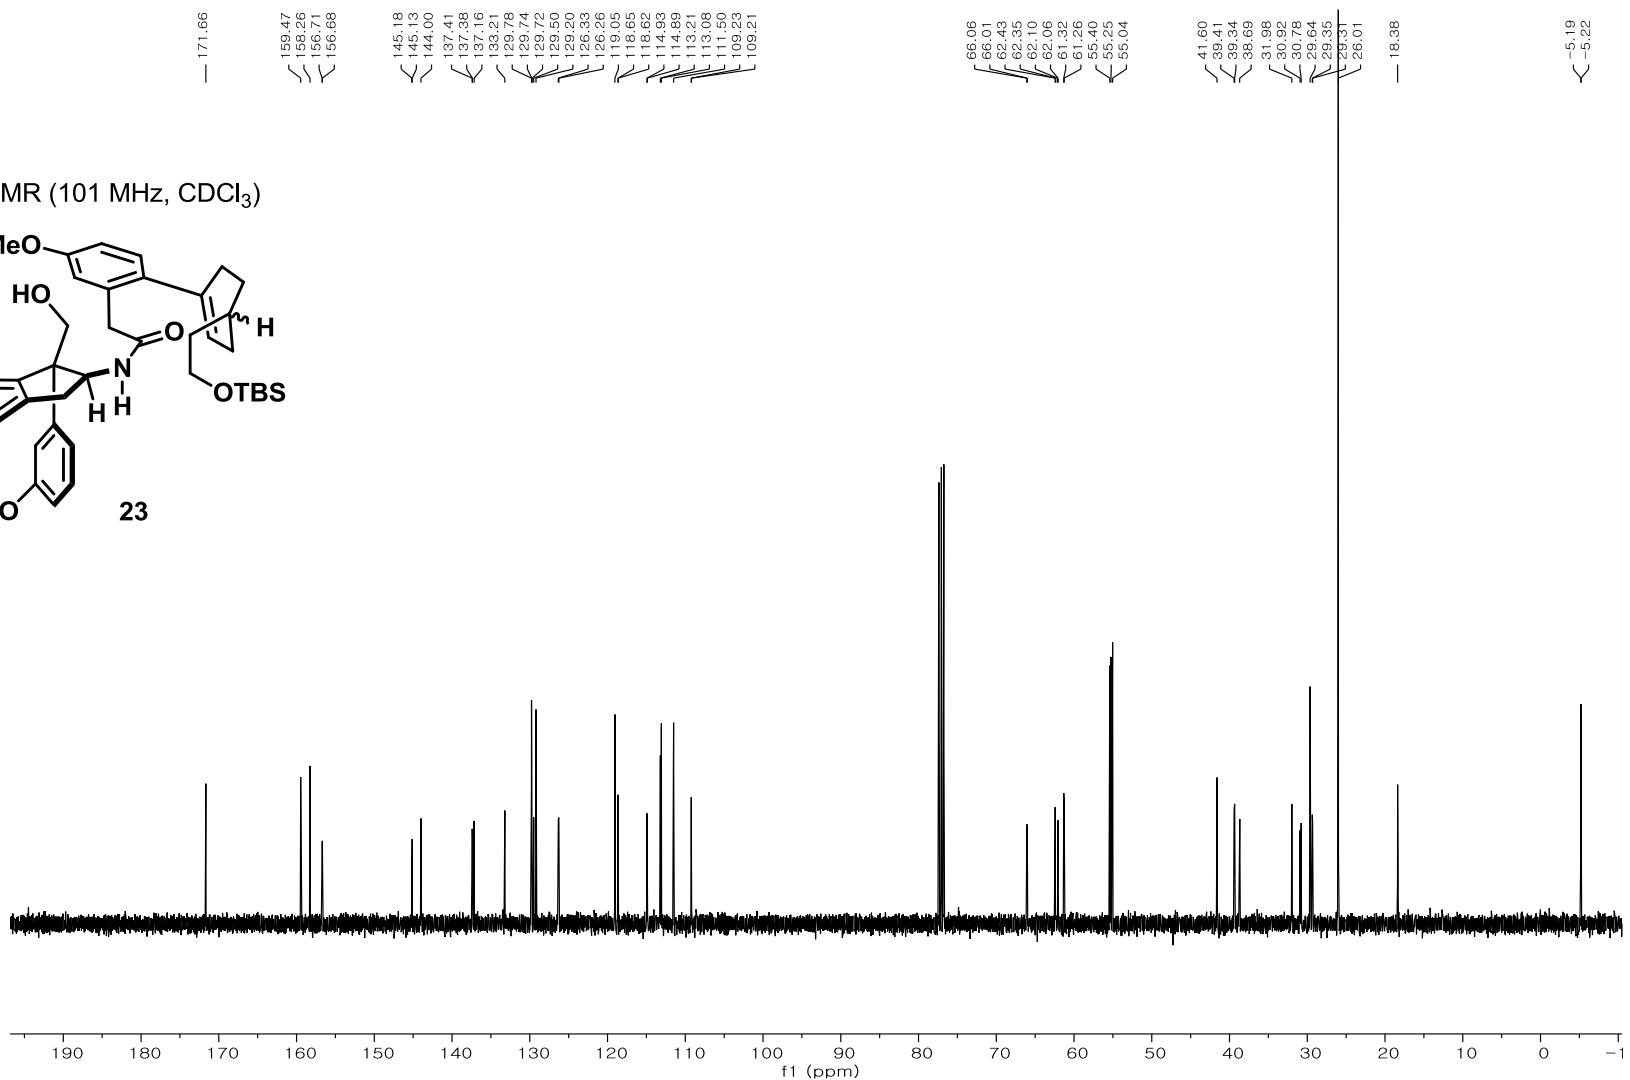



<sup>13</sup>C NMR (101 MHz, CDCl<sub>3</sub>)

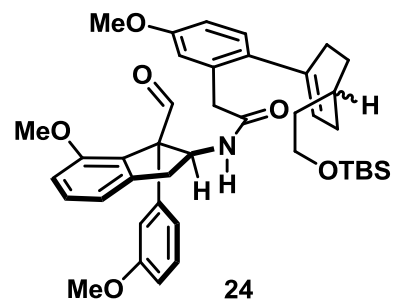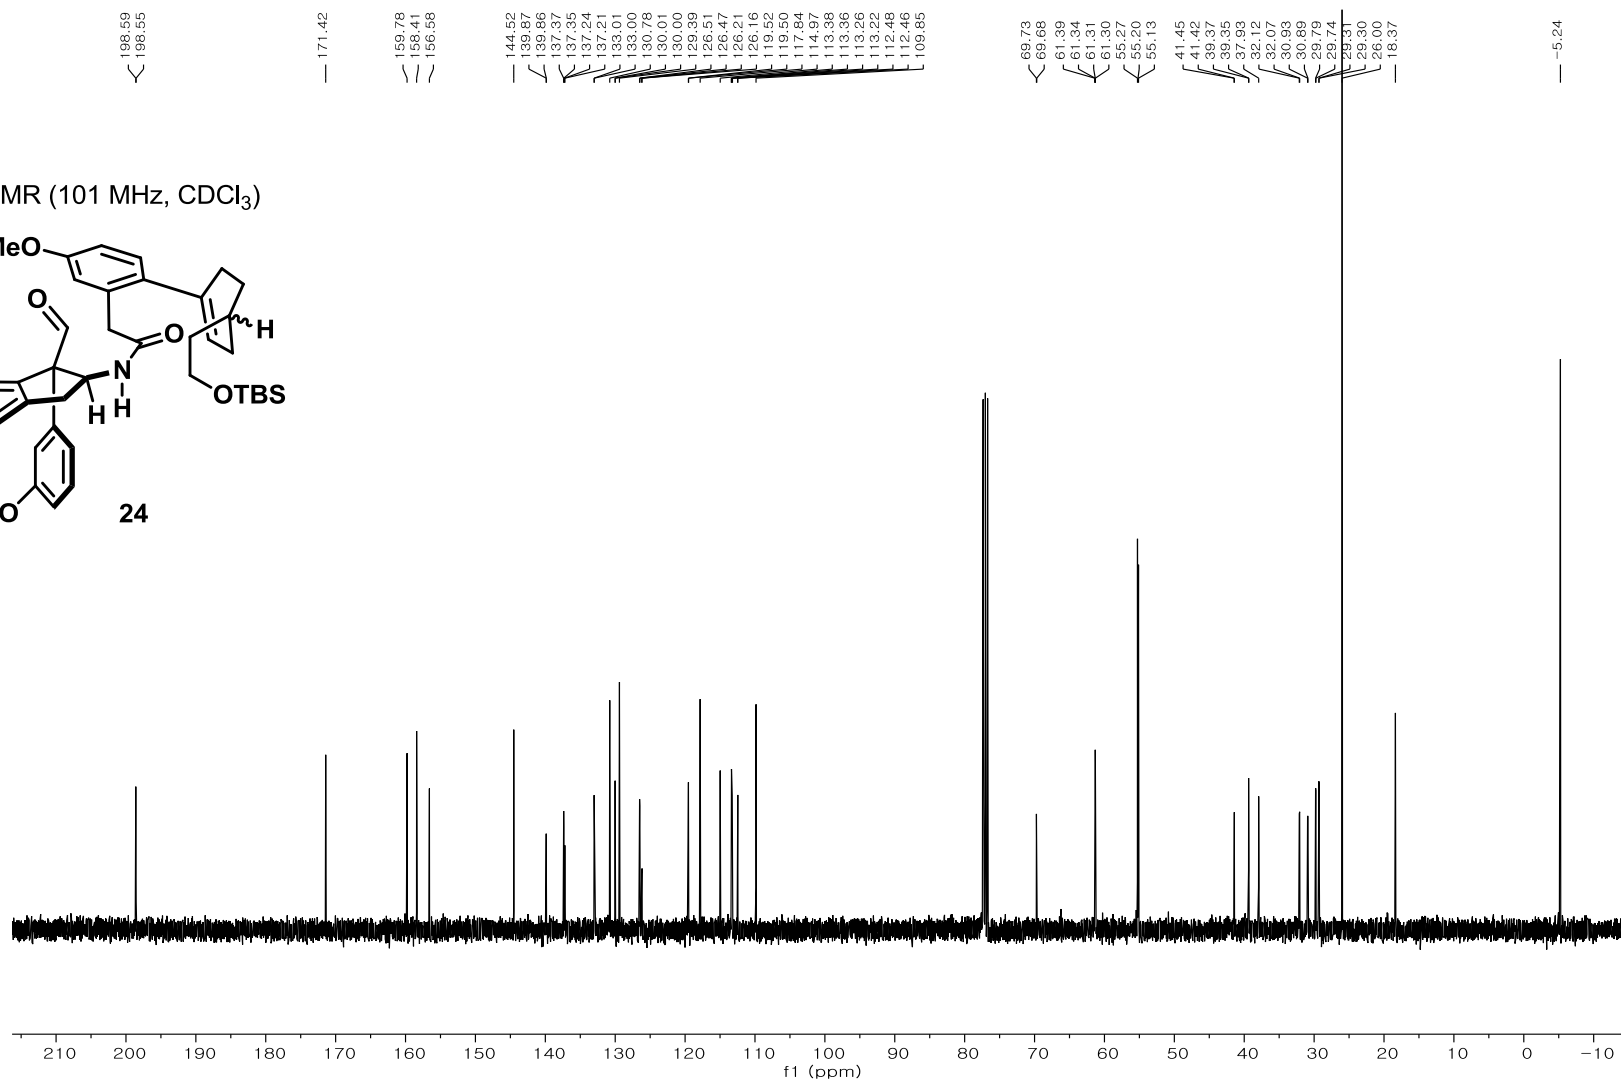



<sup>1</sup>H NMR (400 MHz, CDCl<sub>3</sub>)

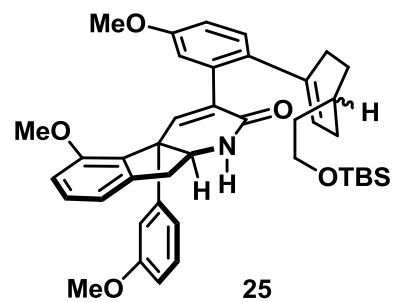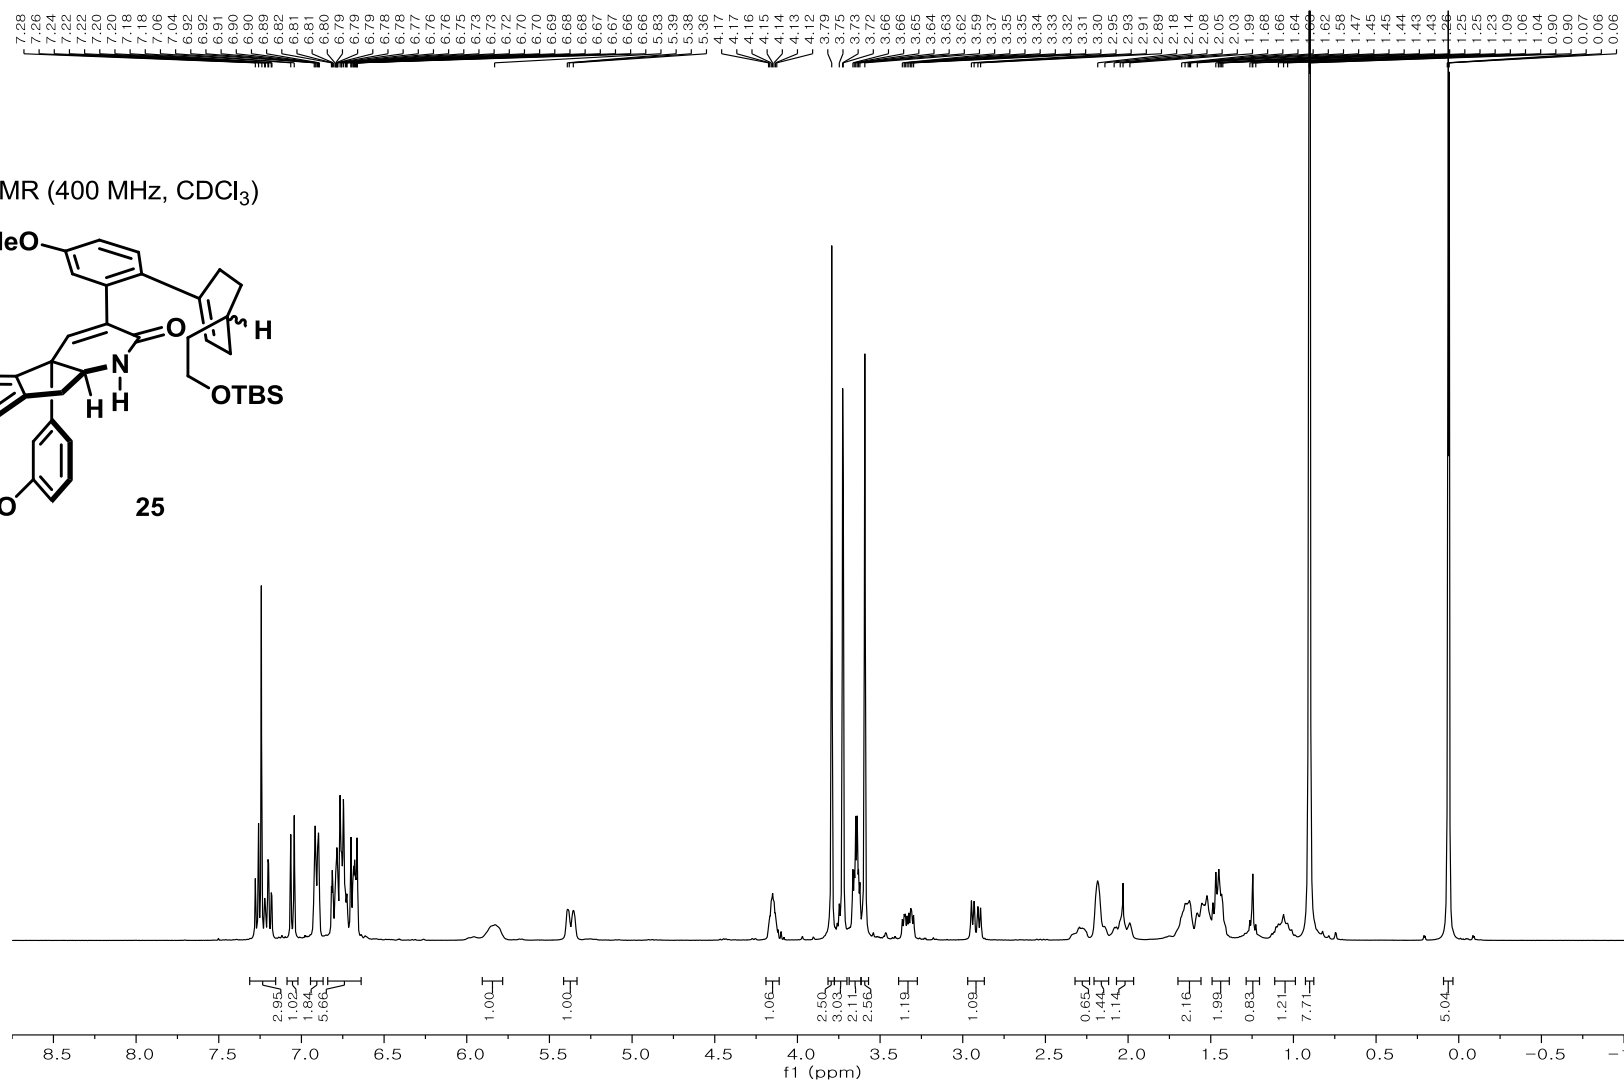

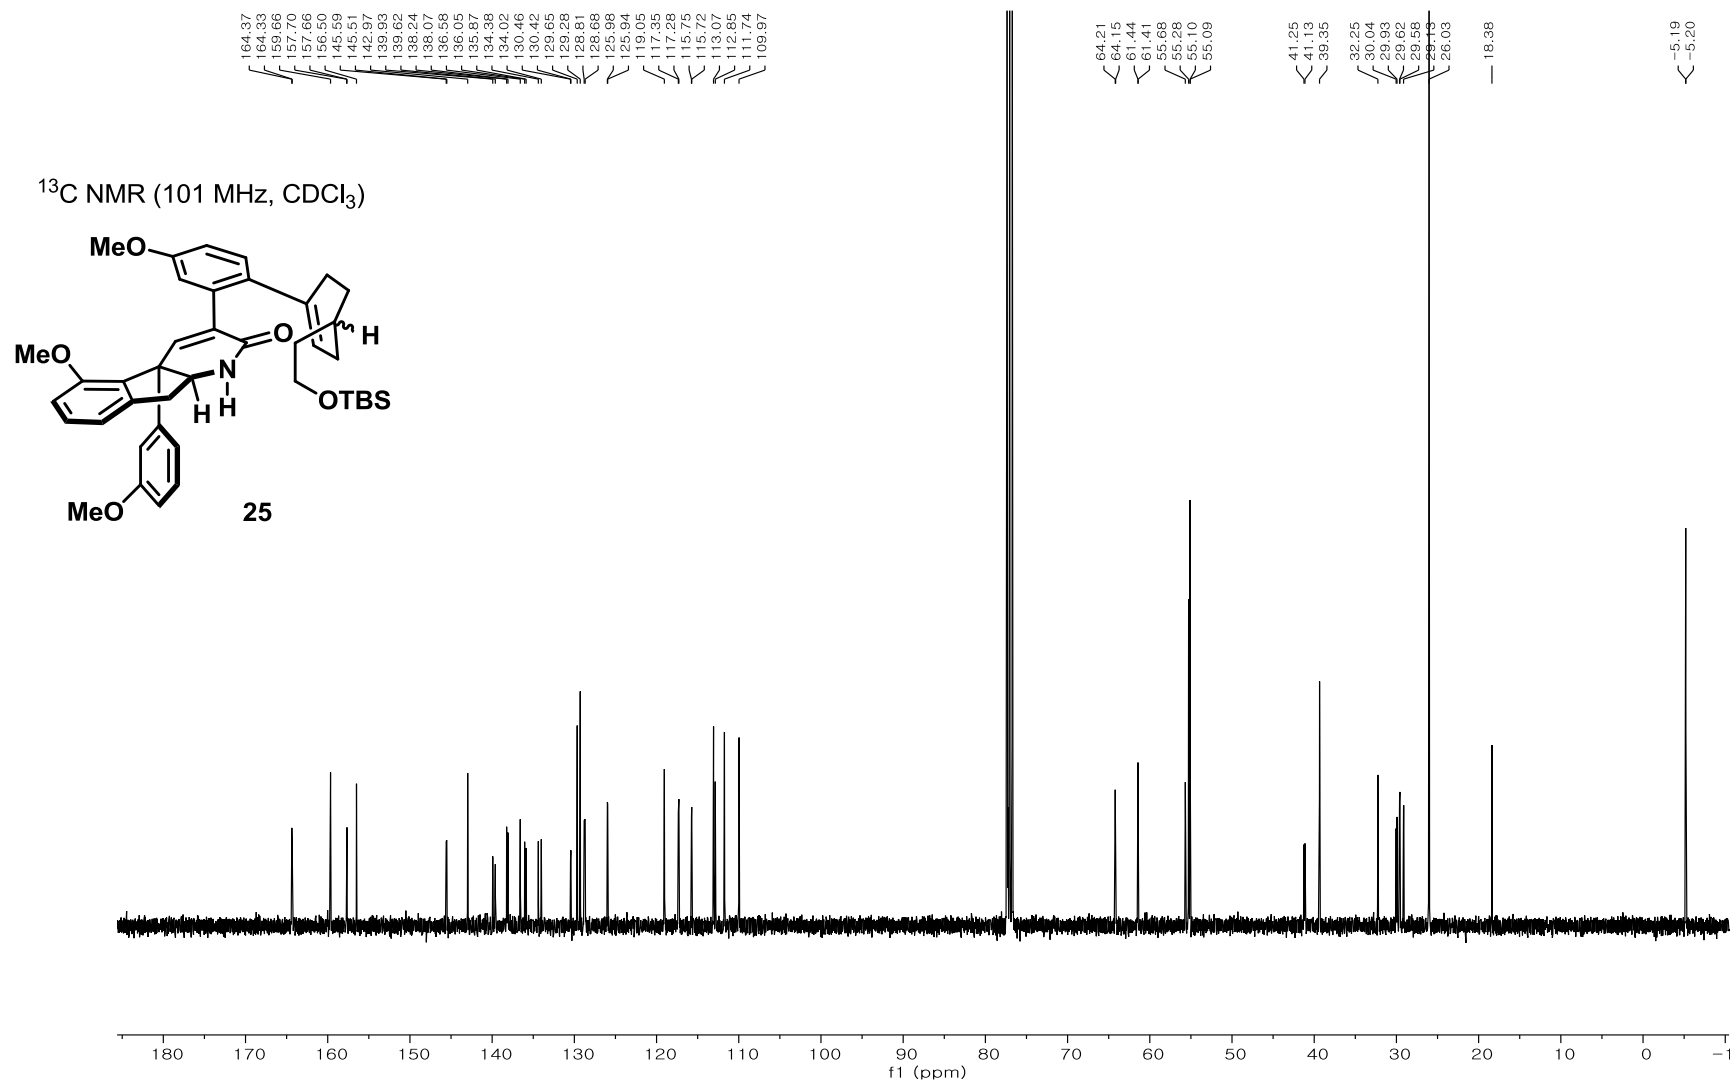

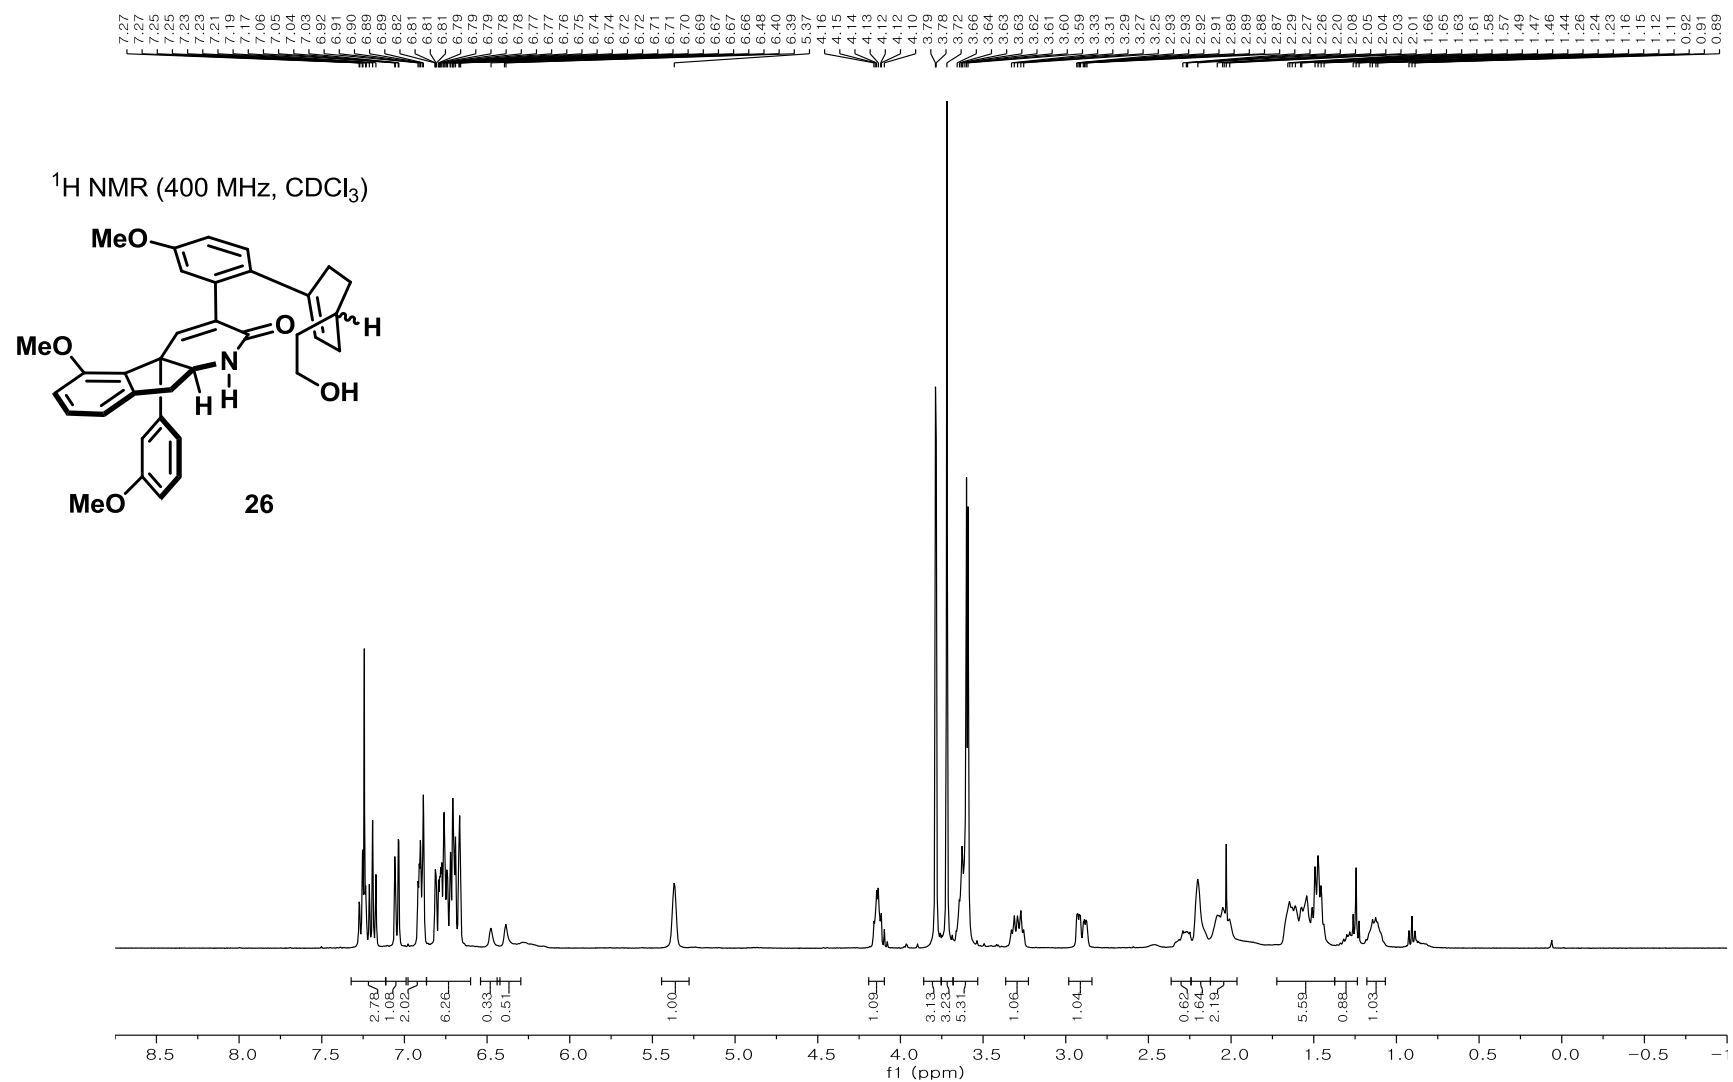

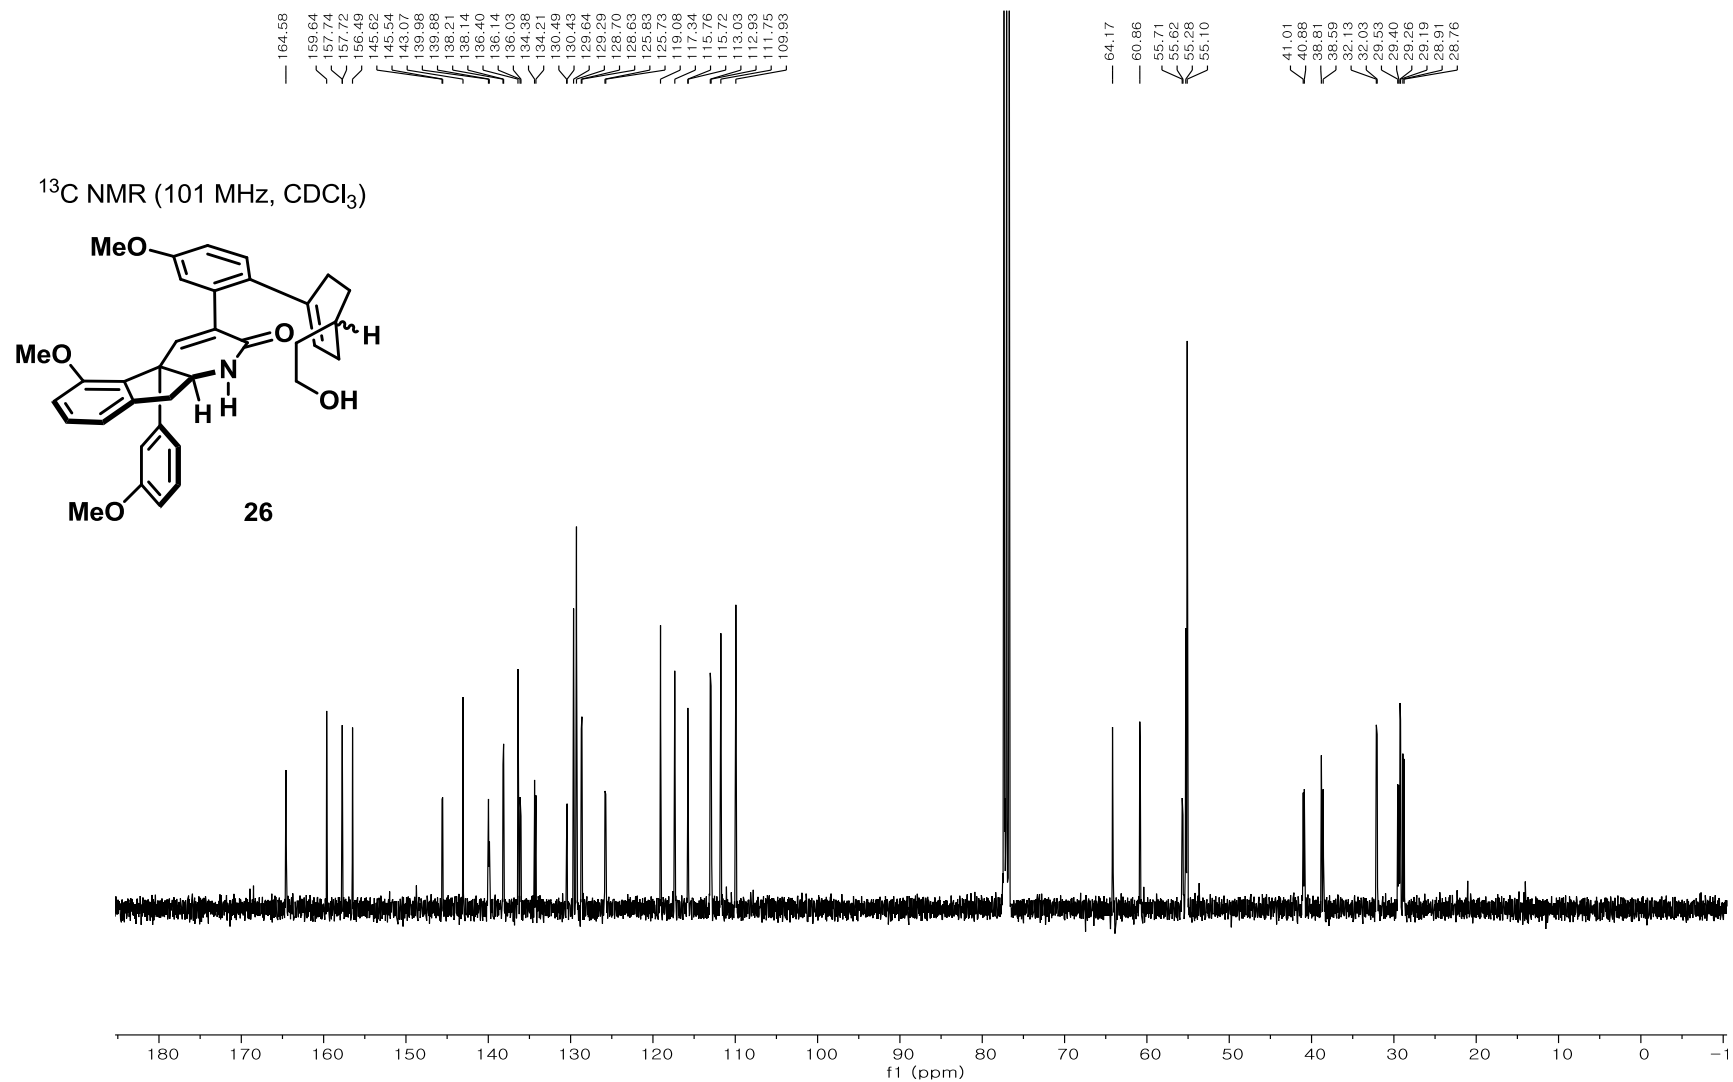

<sup>1</sup>H NMR (400 MHz, CDCl<sub>3</sub>)

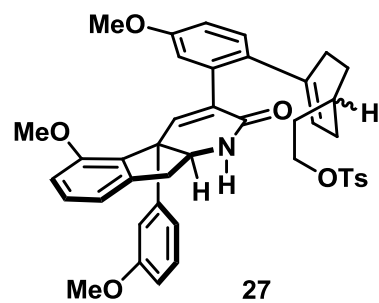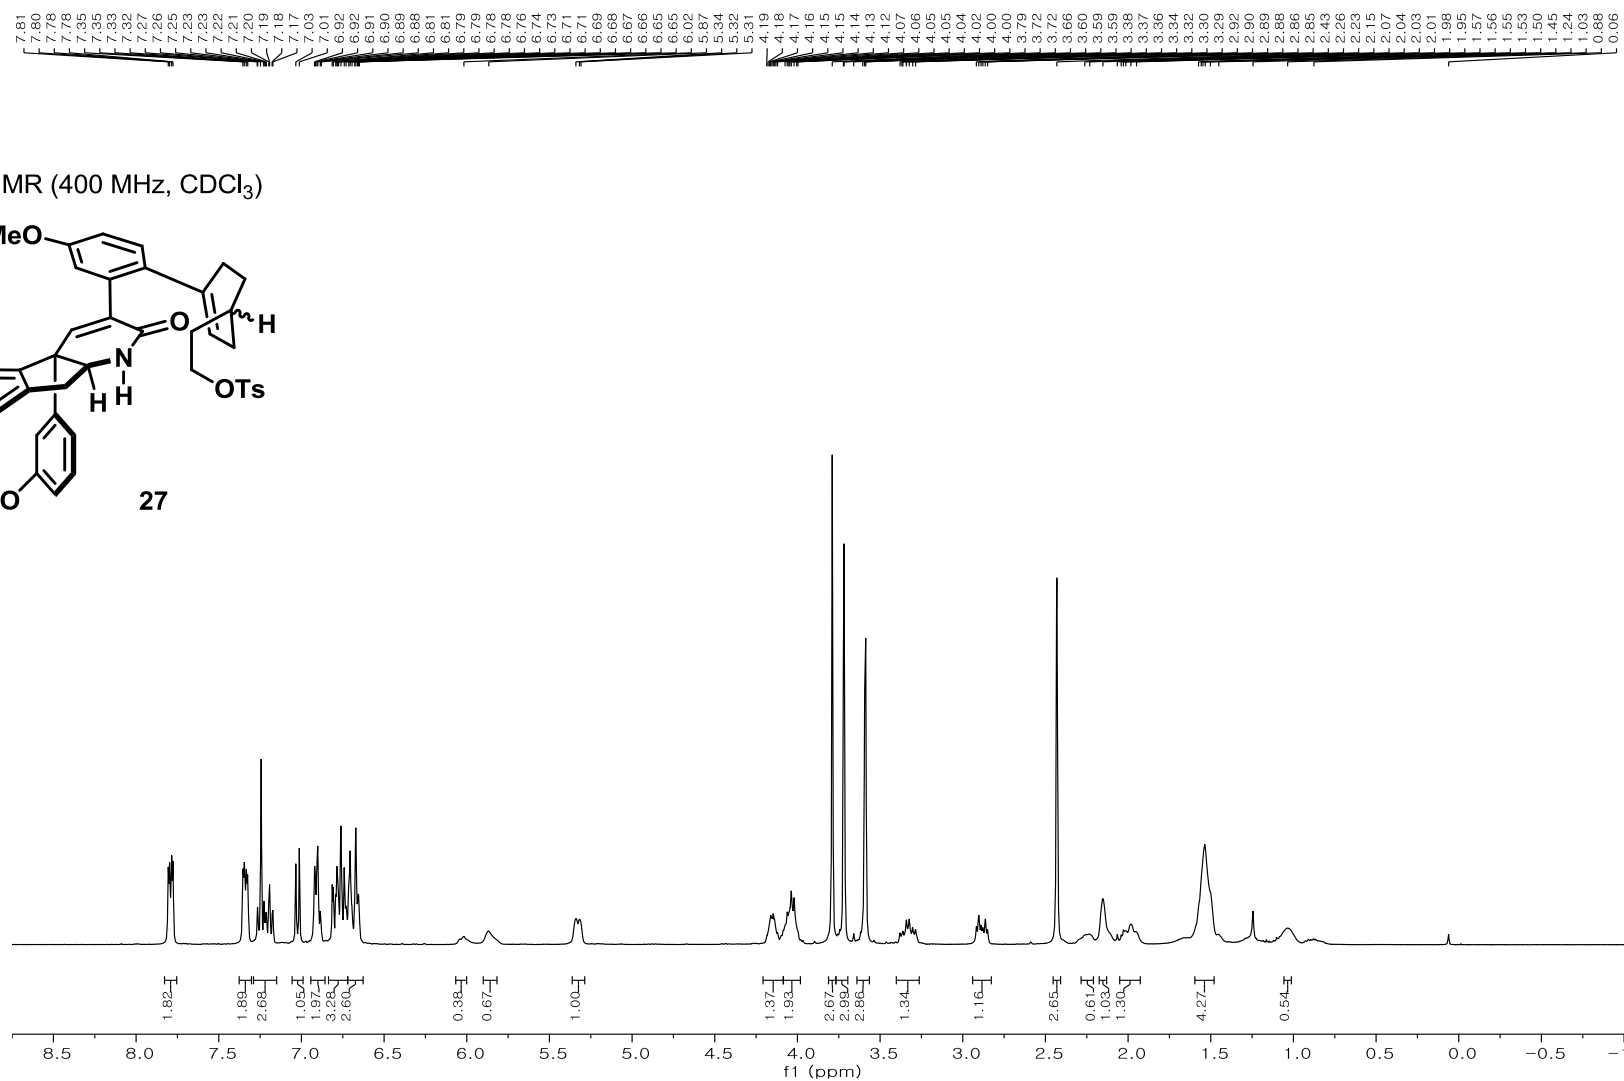

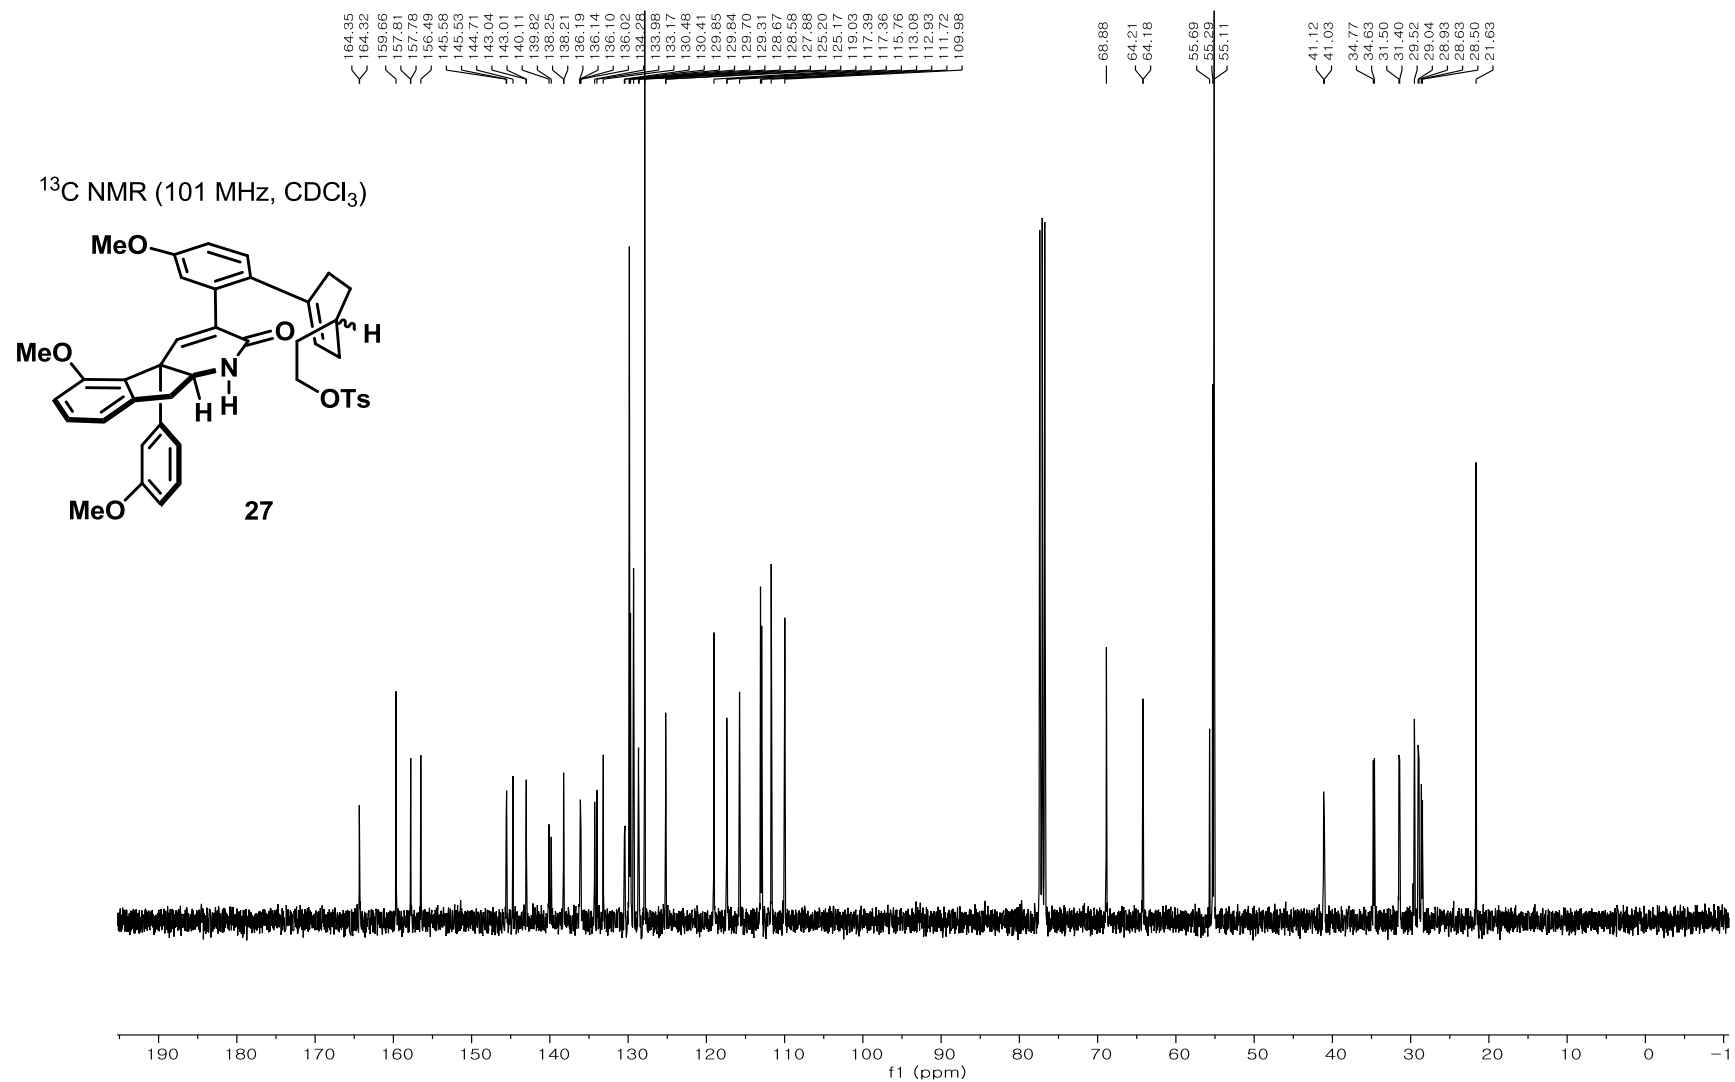

<sup>1</sup>H NMR (400 MHz, CDCl<sub>3</sub>)

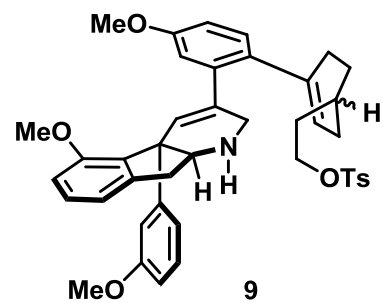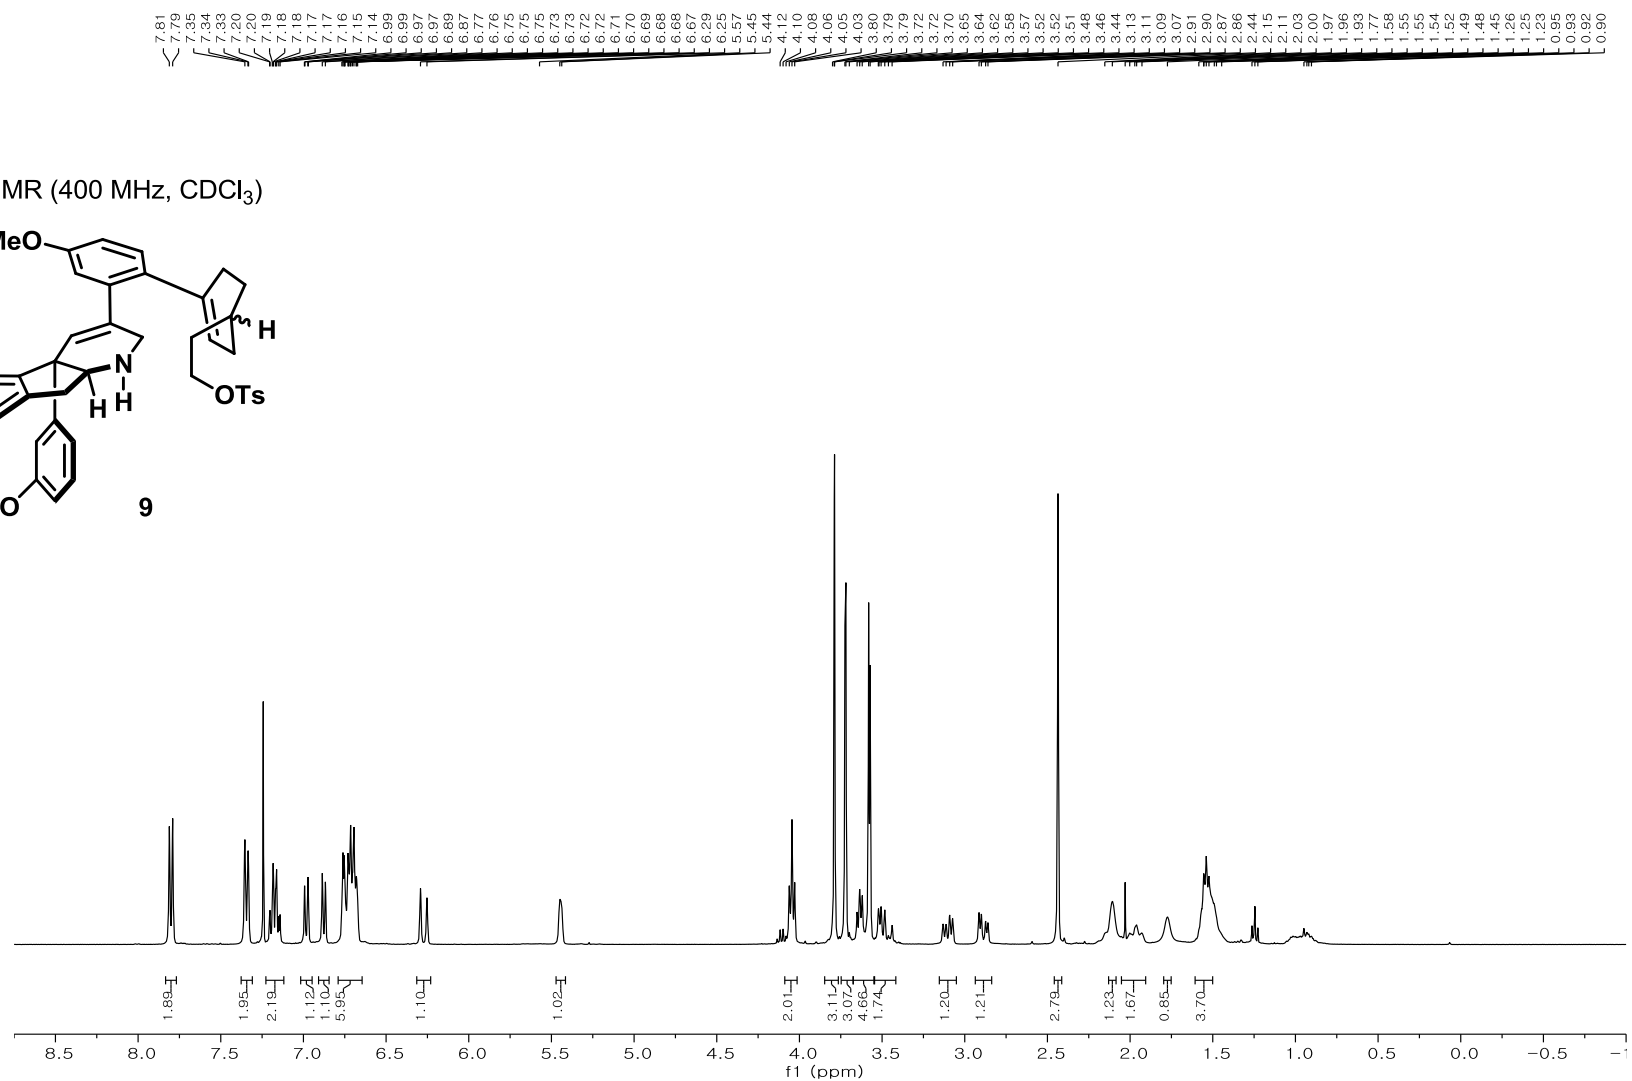

$^{13}\text{C}$  NMR (101 MHz,  $\text{CDCl}_3$ )

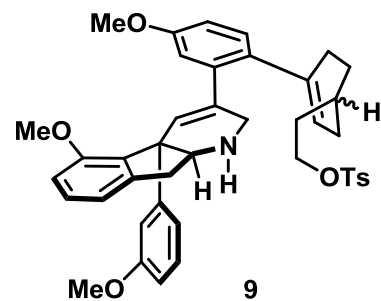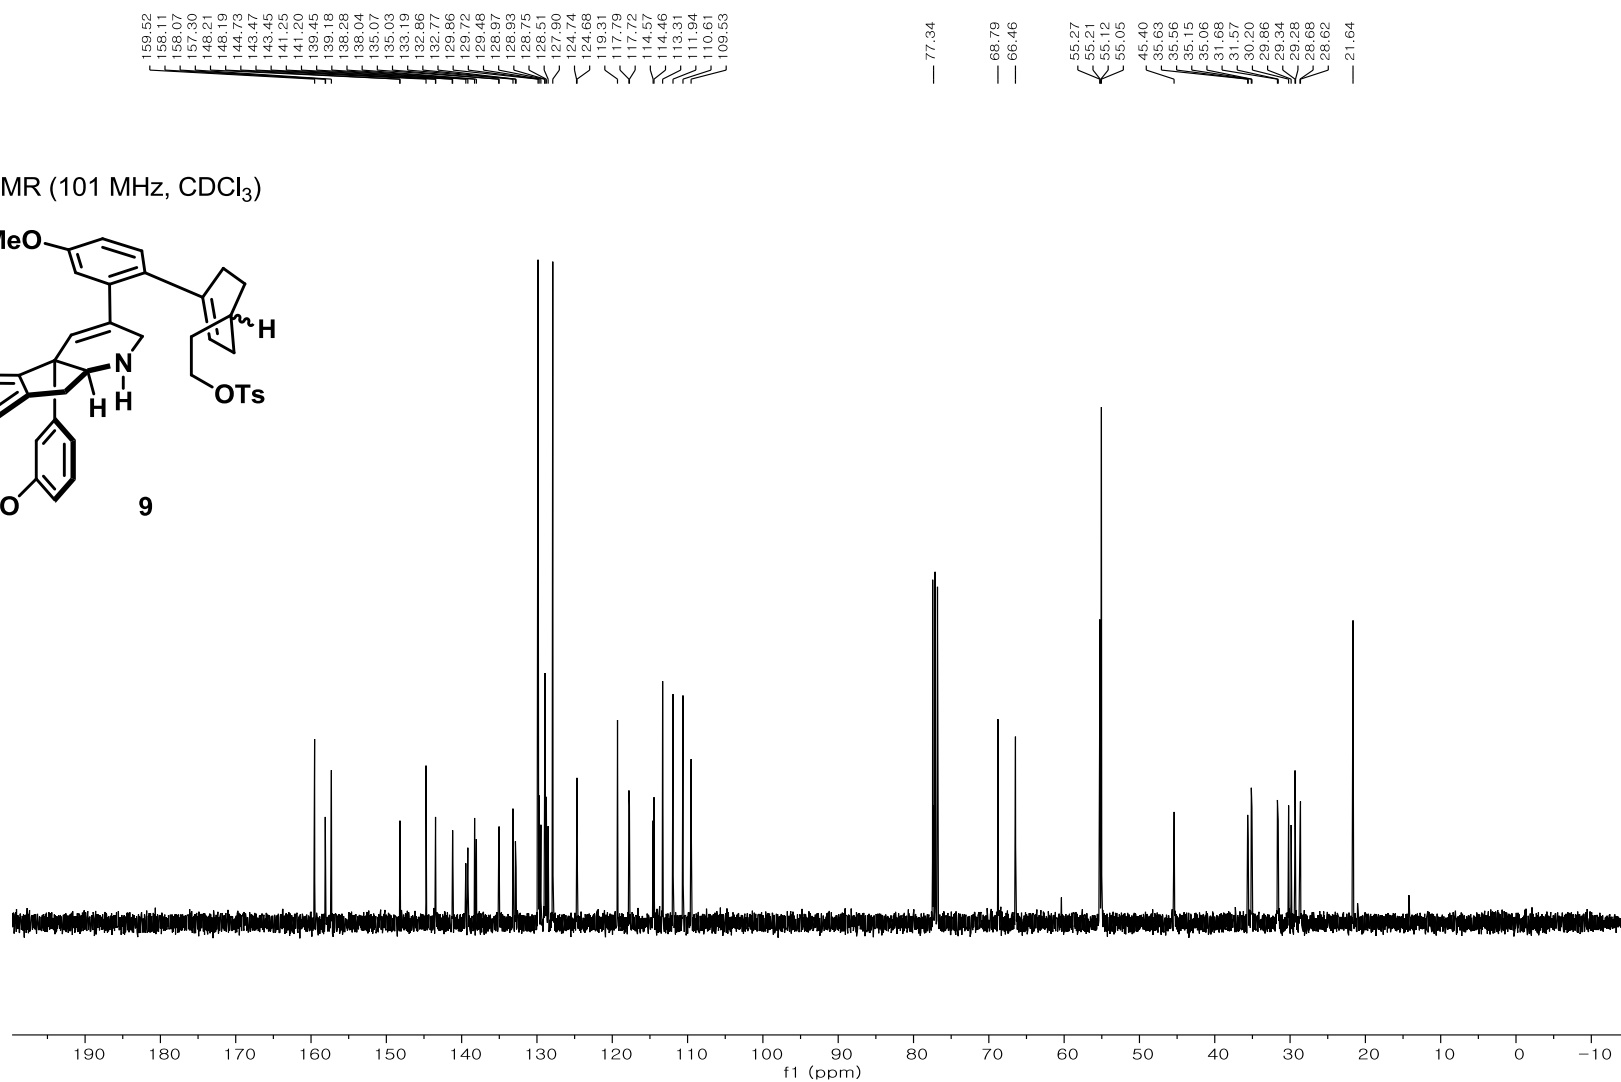



<sup>1</sup>H NMR (400 MHz, CDCl<sub>3</sub>)

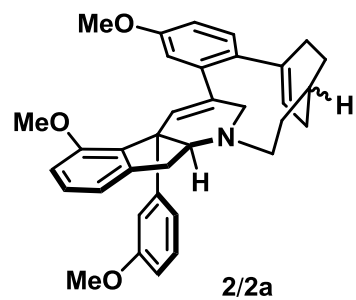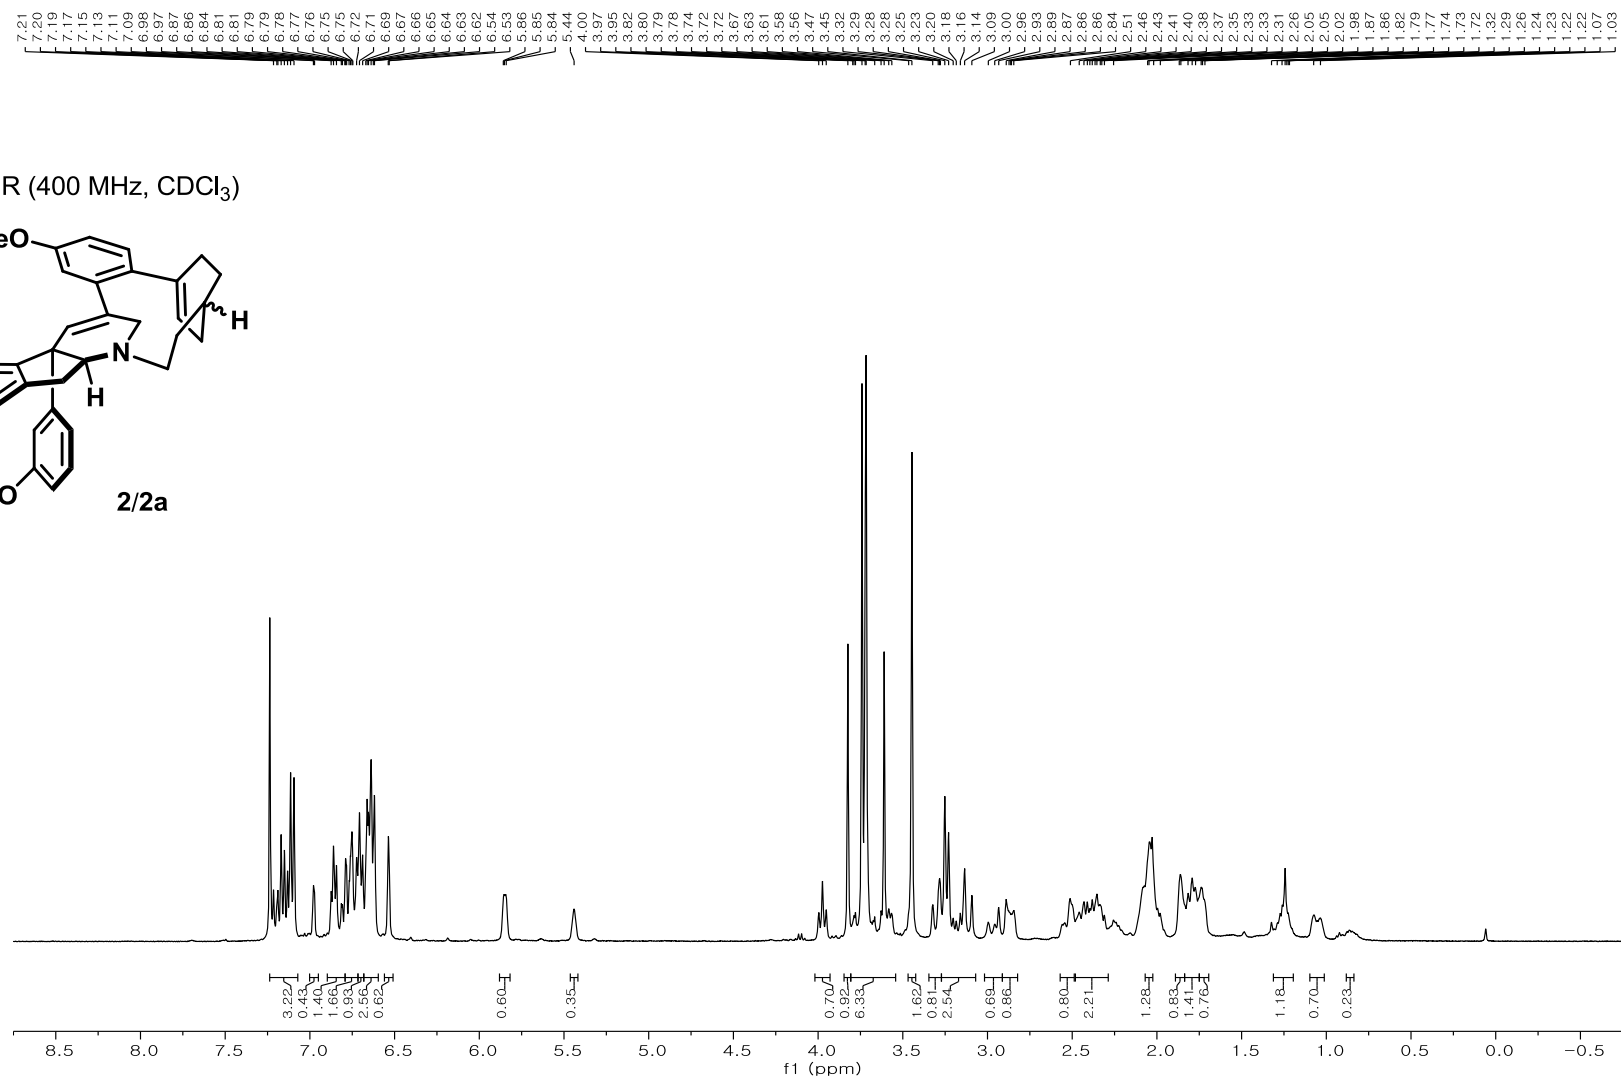

<sup>13</sup>C NMR (101 MHz, CDCl<sub>3</sub>)

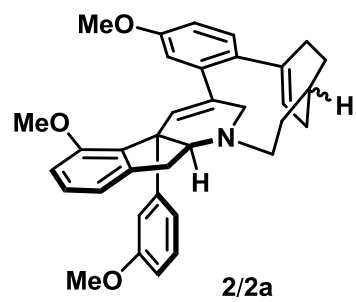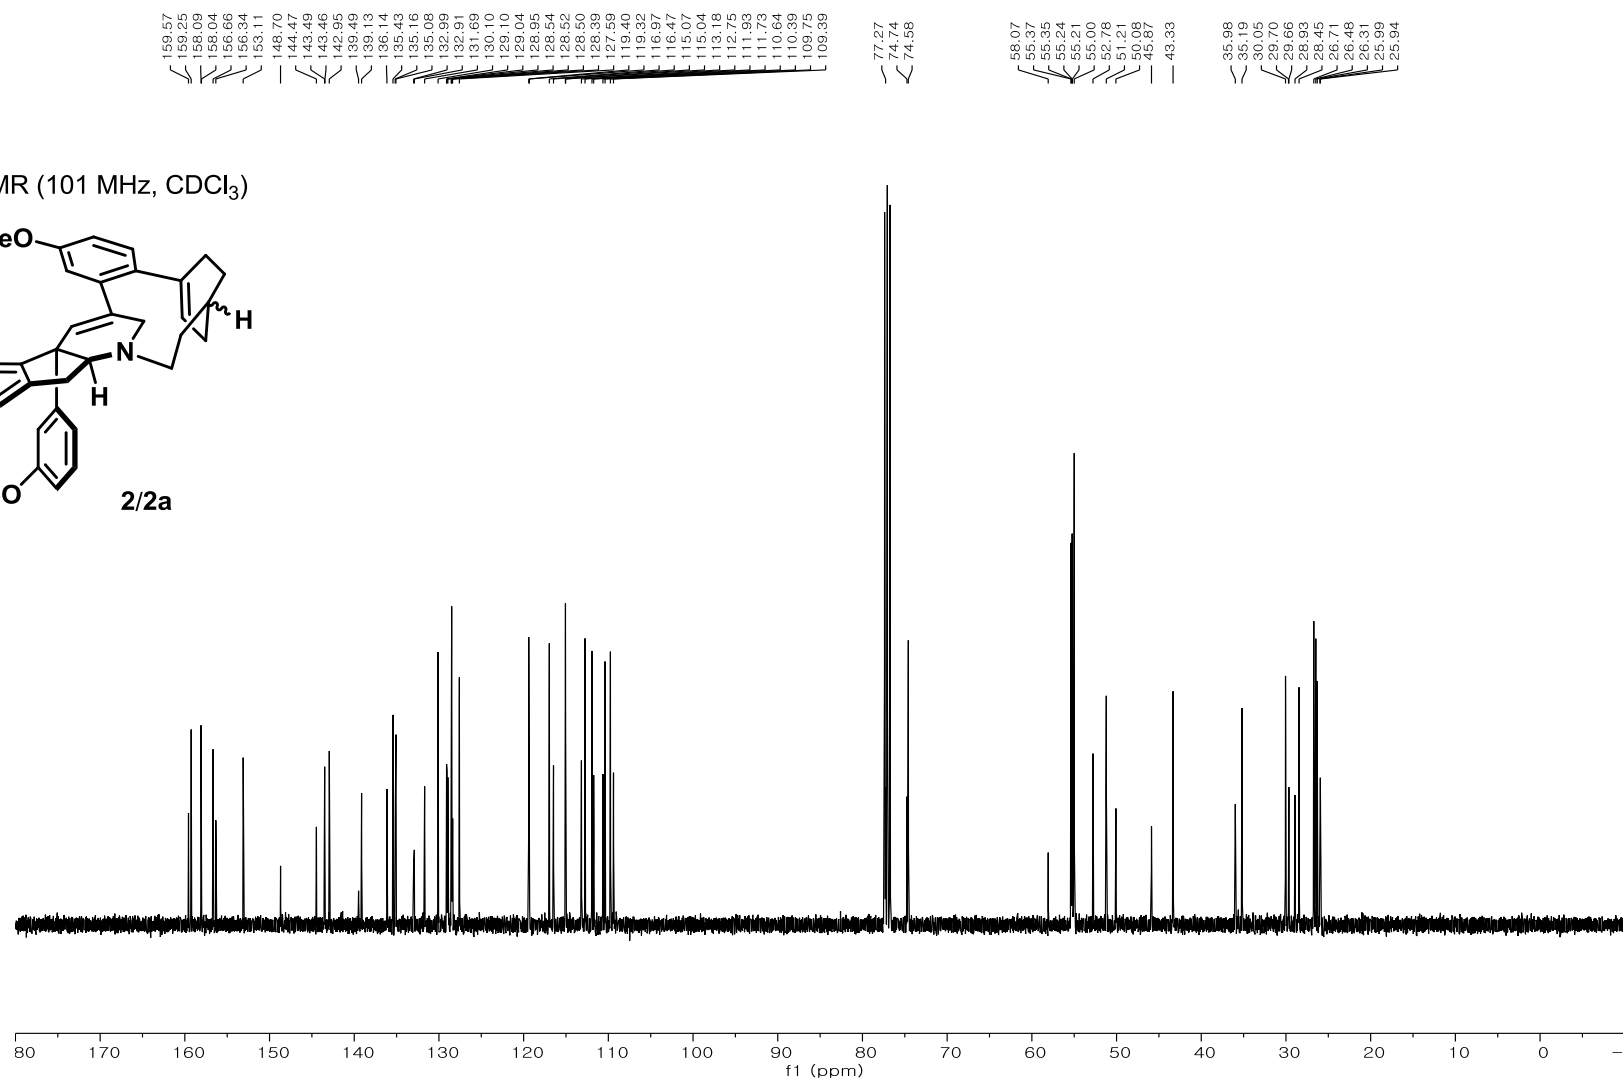

$^1\text{H}$  NMR (400 MHz,  $\text{CDCl}_3$ )

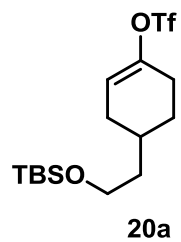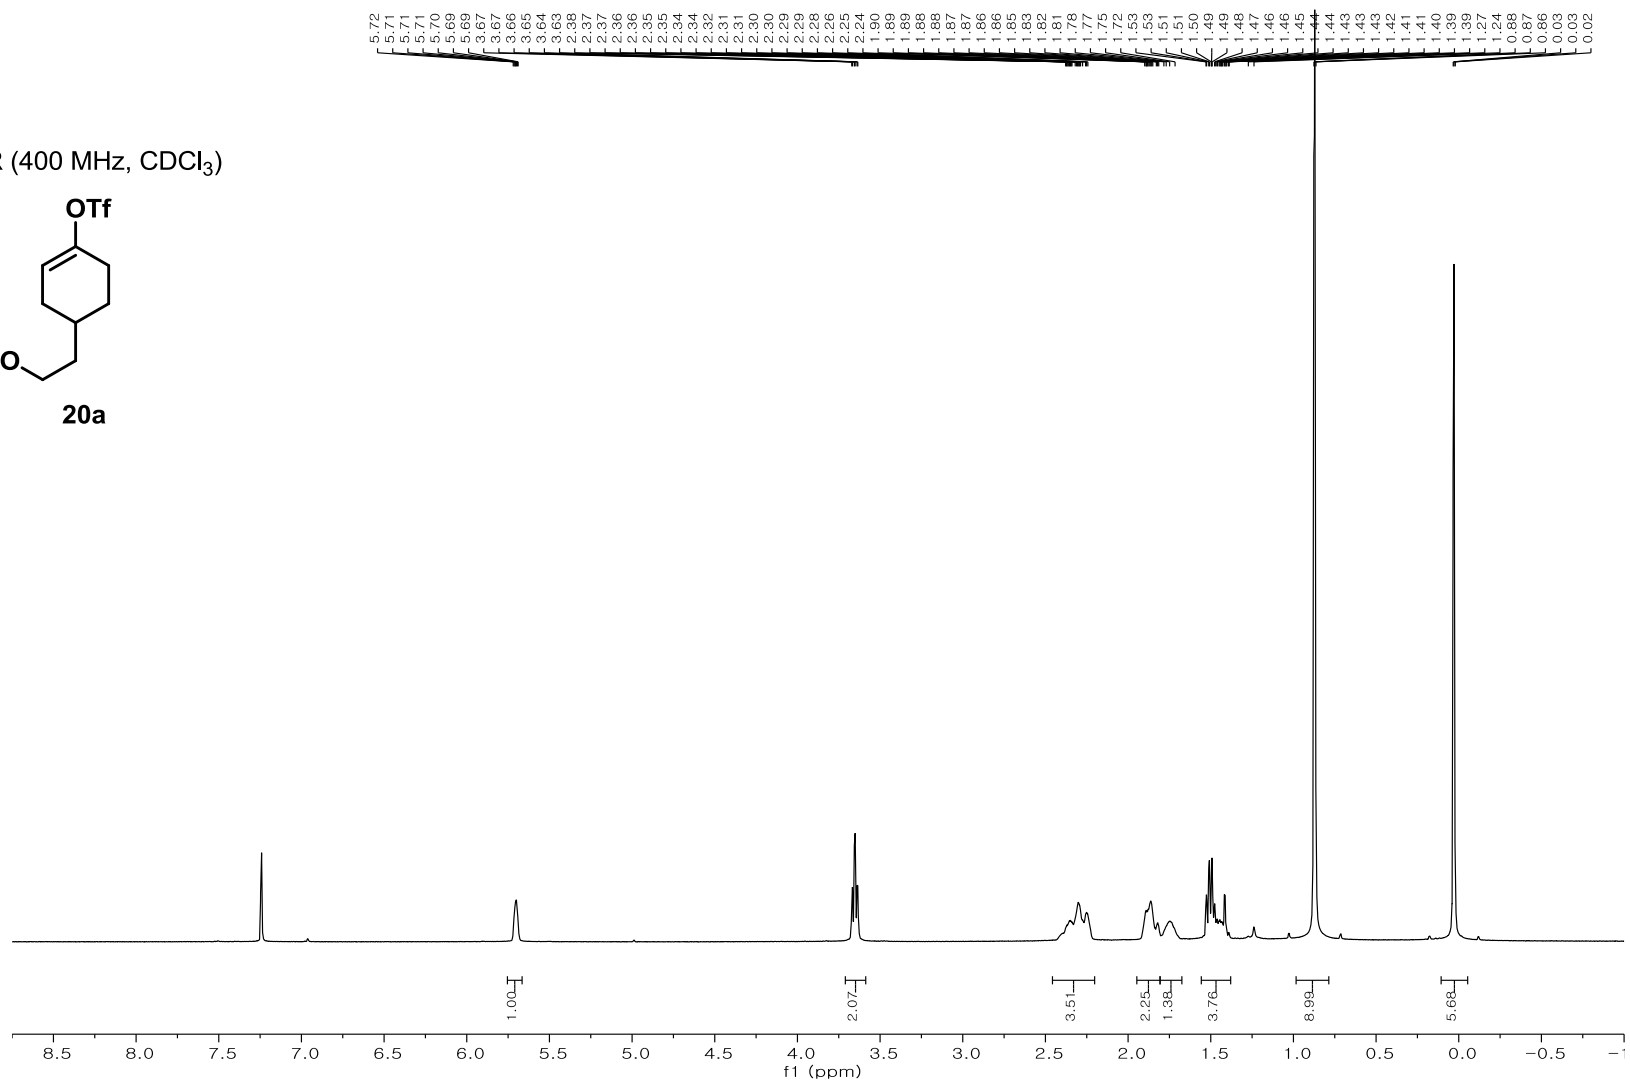

$^{13}\text{C}$  NMR (101 MHz,  $\text{CDCl}_3$ )

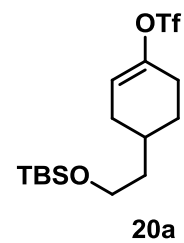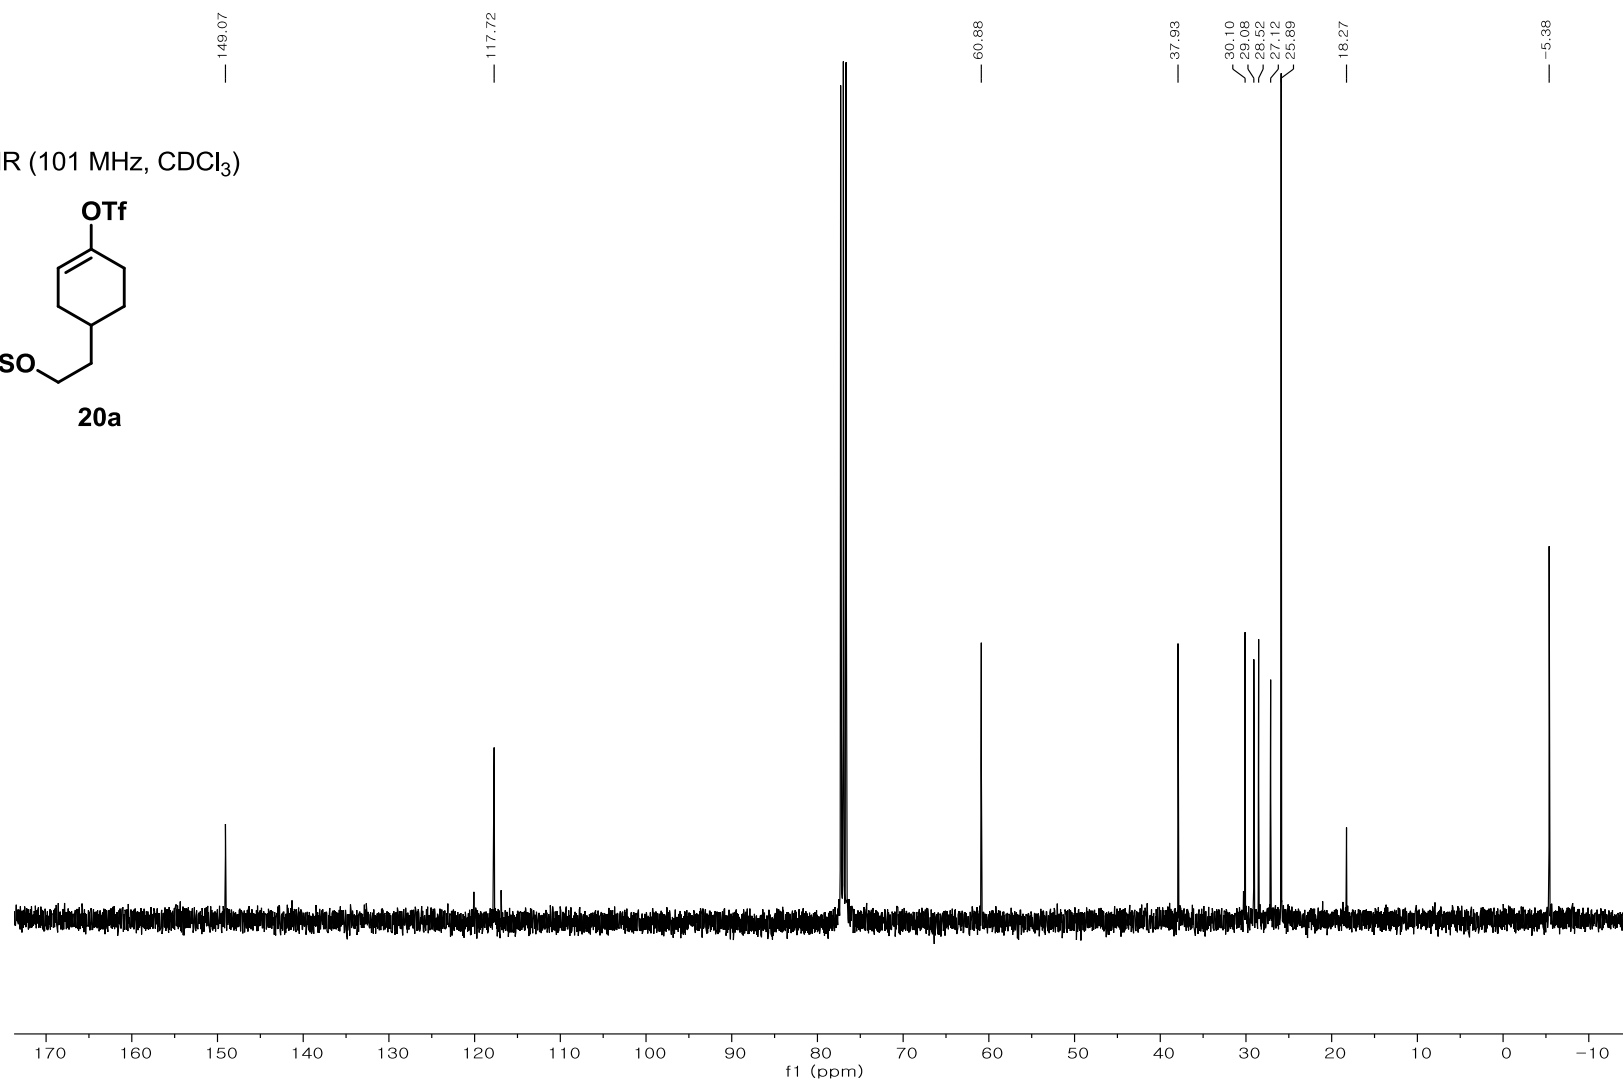

<sup>1</sup>H NMR (400 MHz, CDCl<sub>3</sub>)

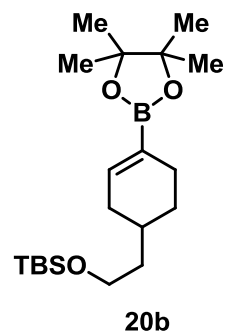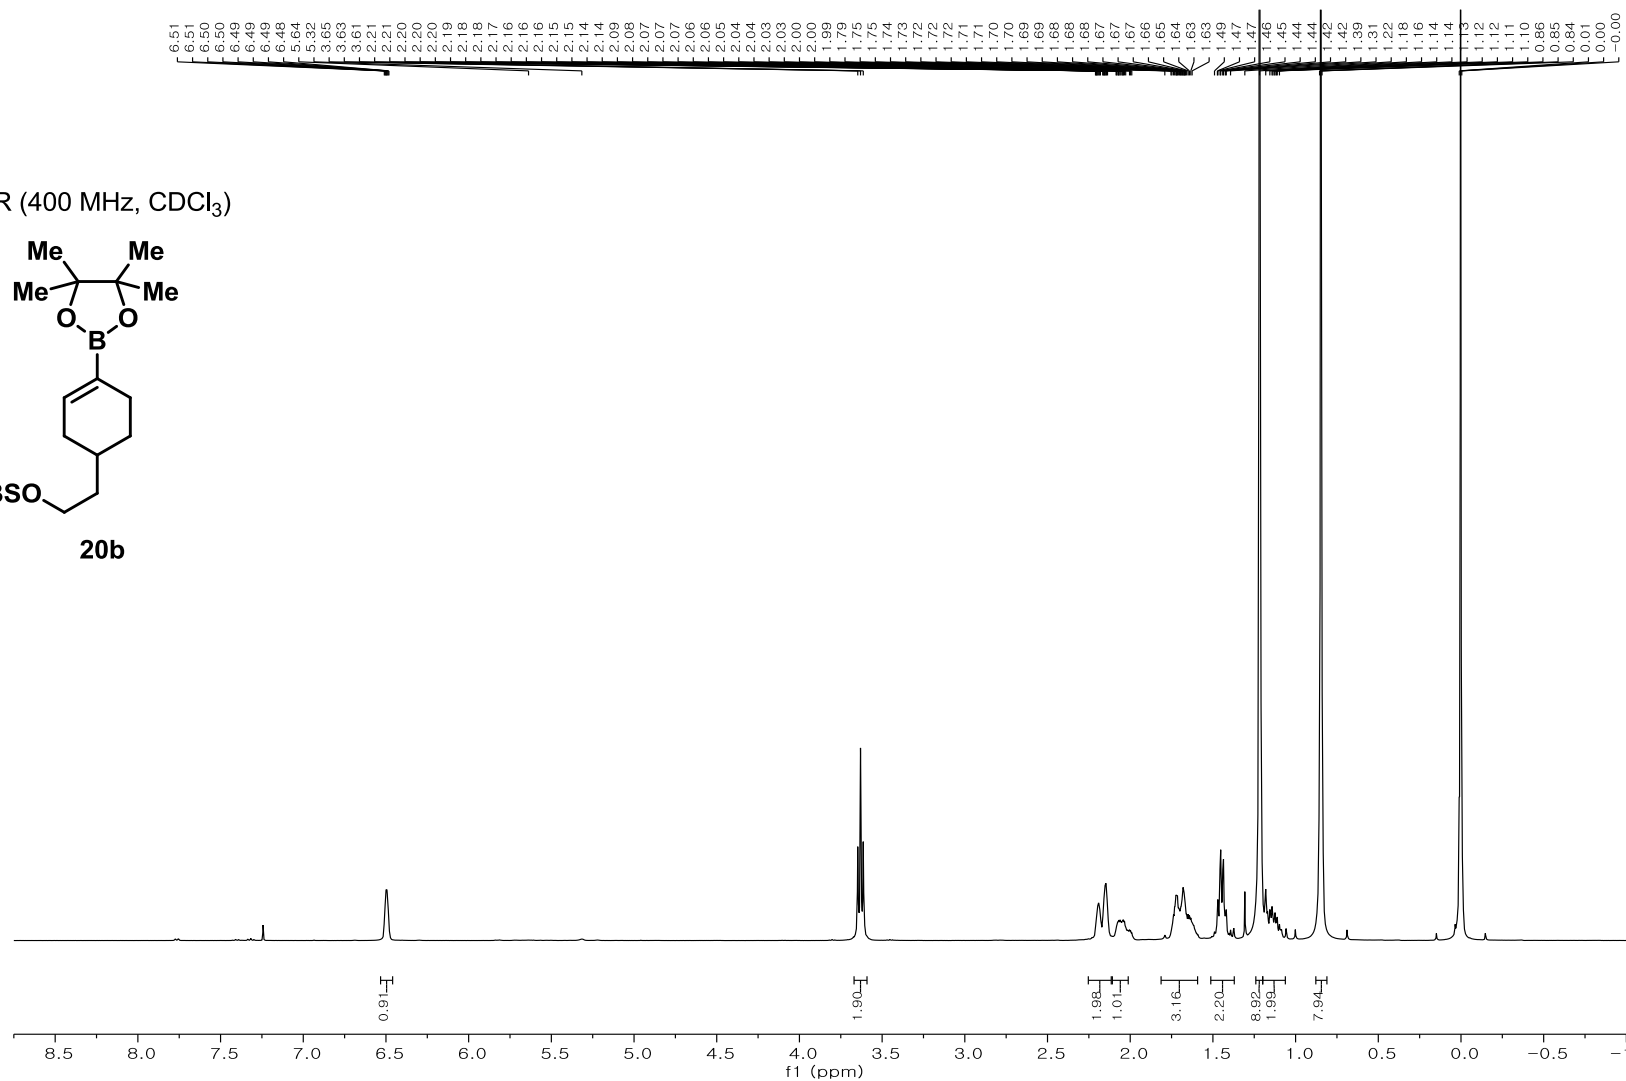

$^{13}\text{C}$  NMR (101 MHz,  $\text{CDCl}_3$ )

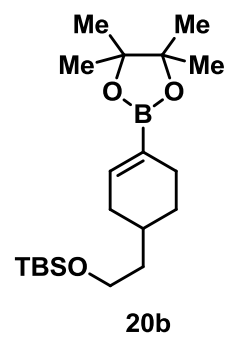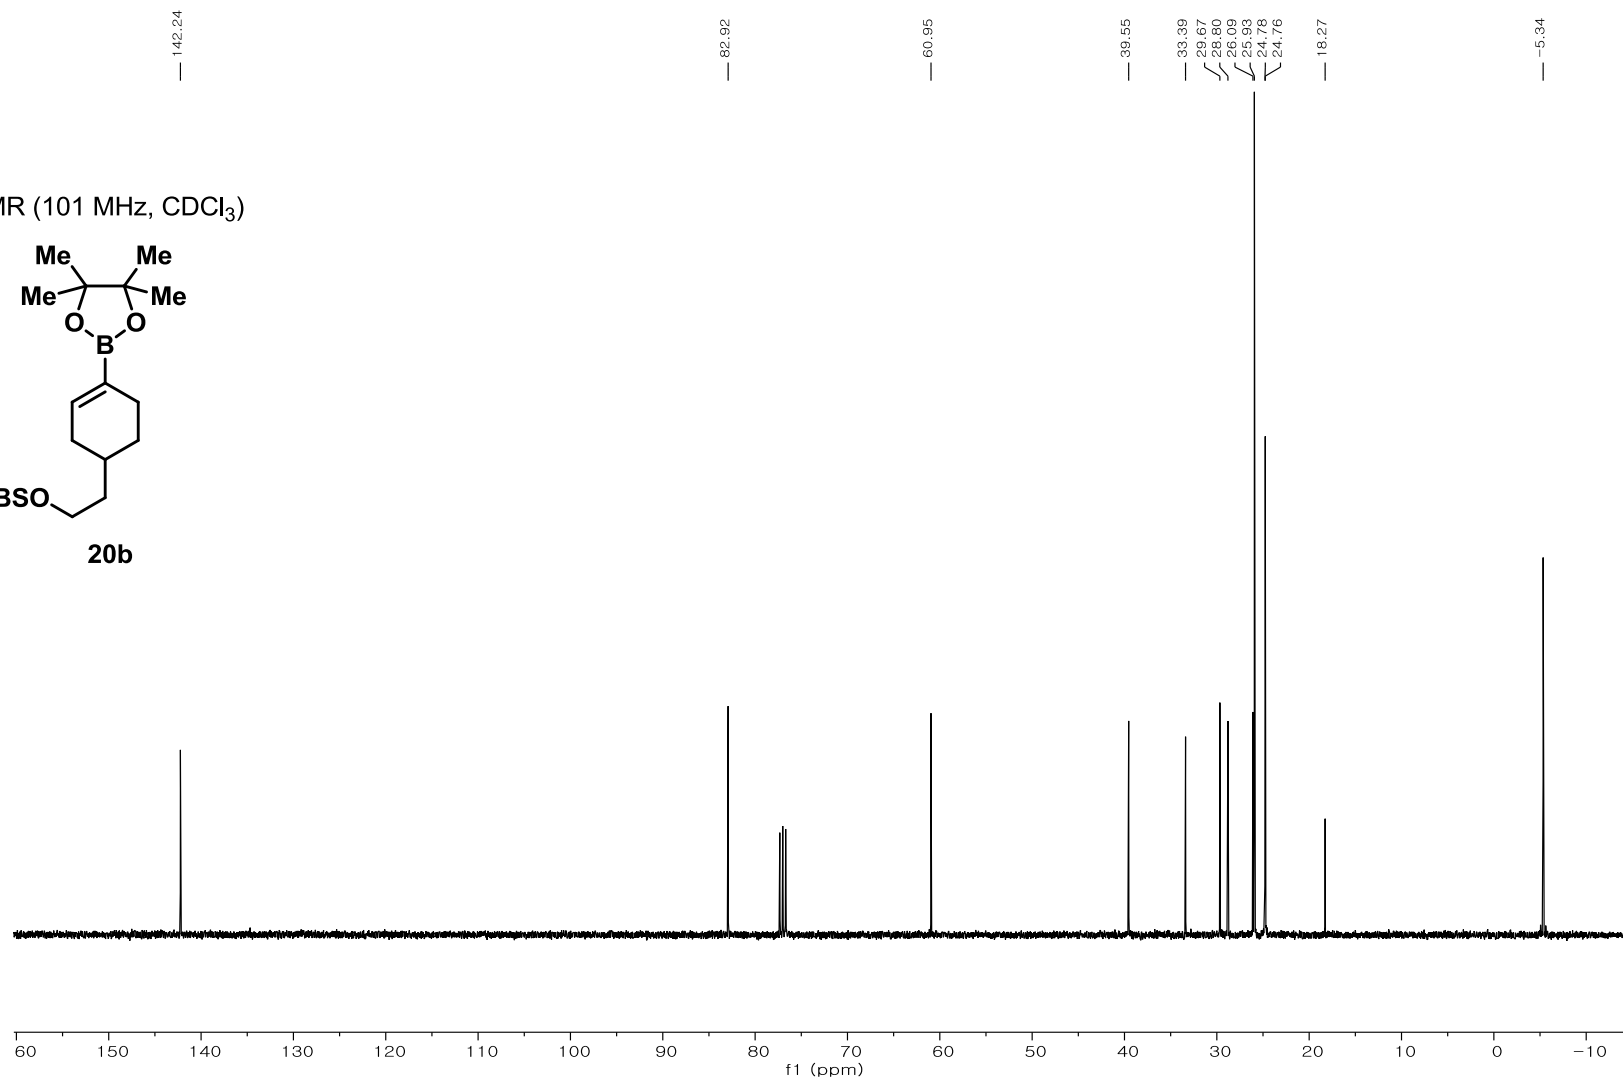

<sup>1</sup>H NMR (400 MHz, CDCl<sub>3</sub>)

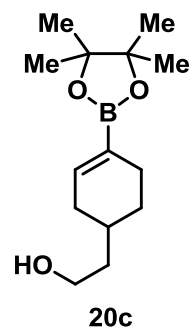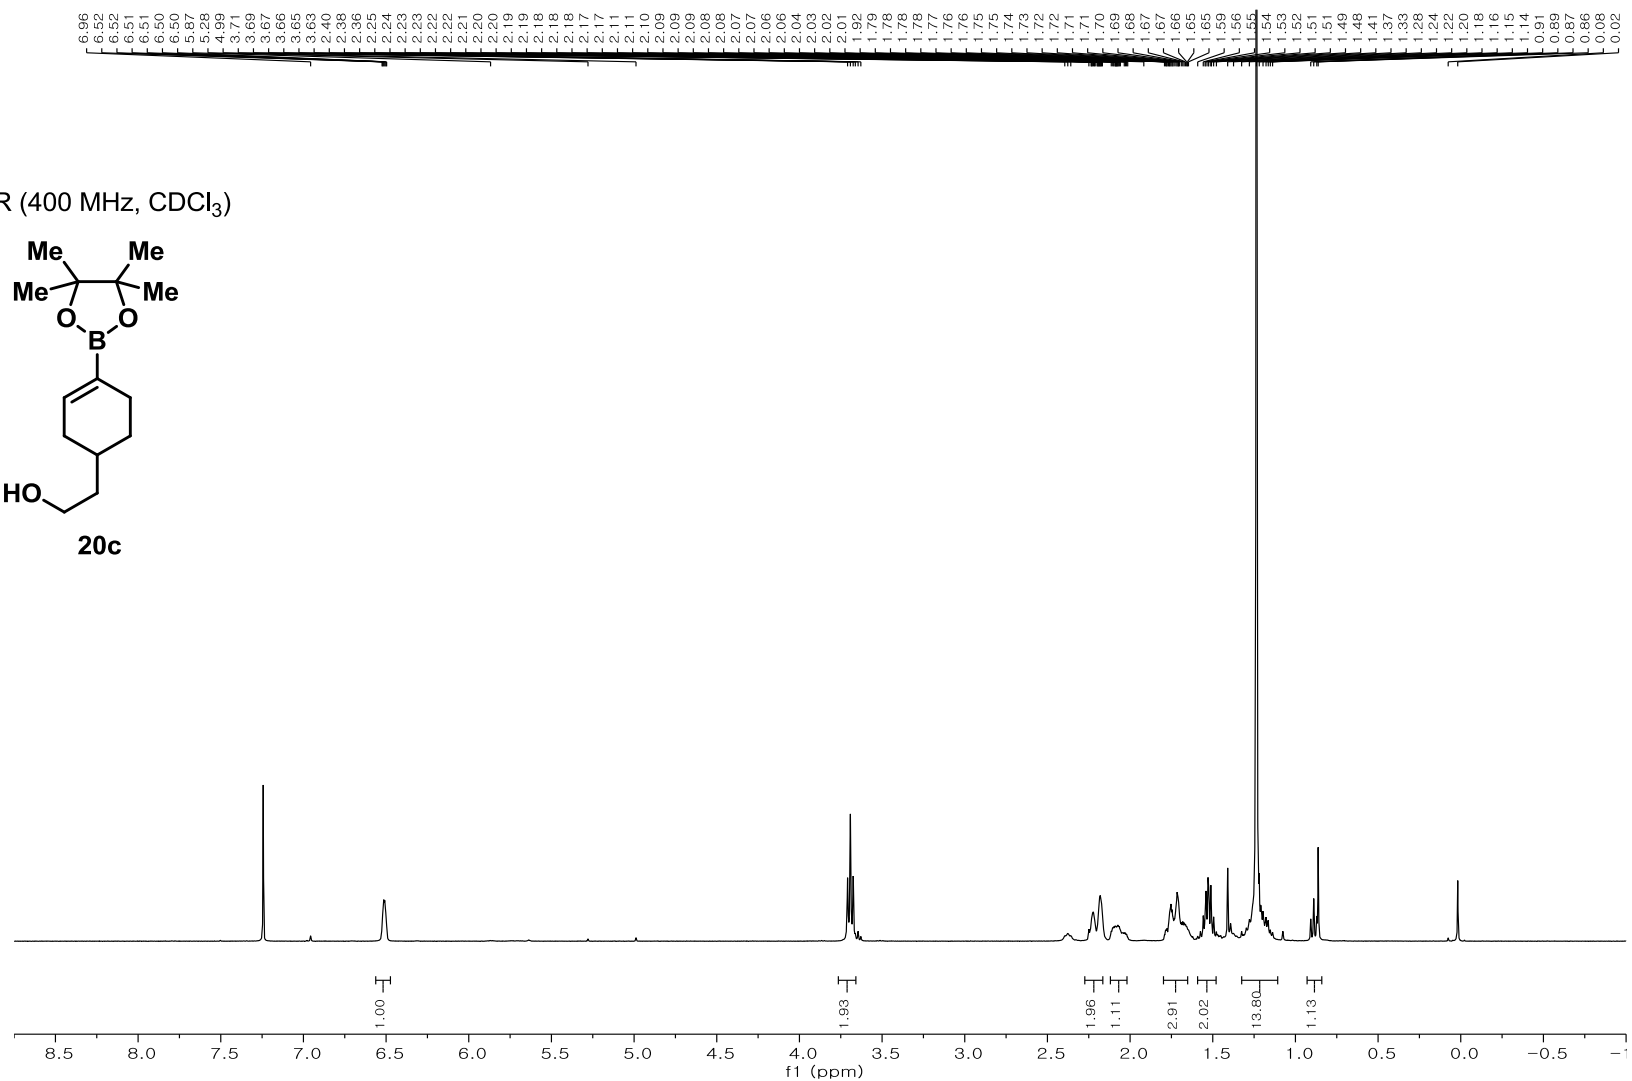

<sup>13</sup>C NMR (101 MHz, CDCl<sub>3</sub>)

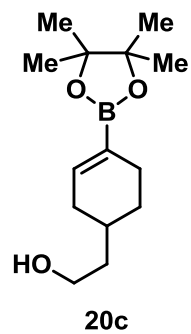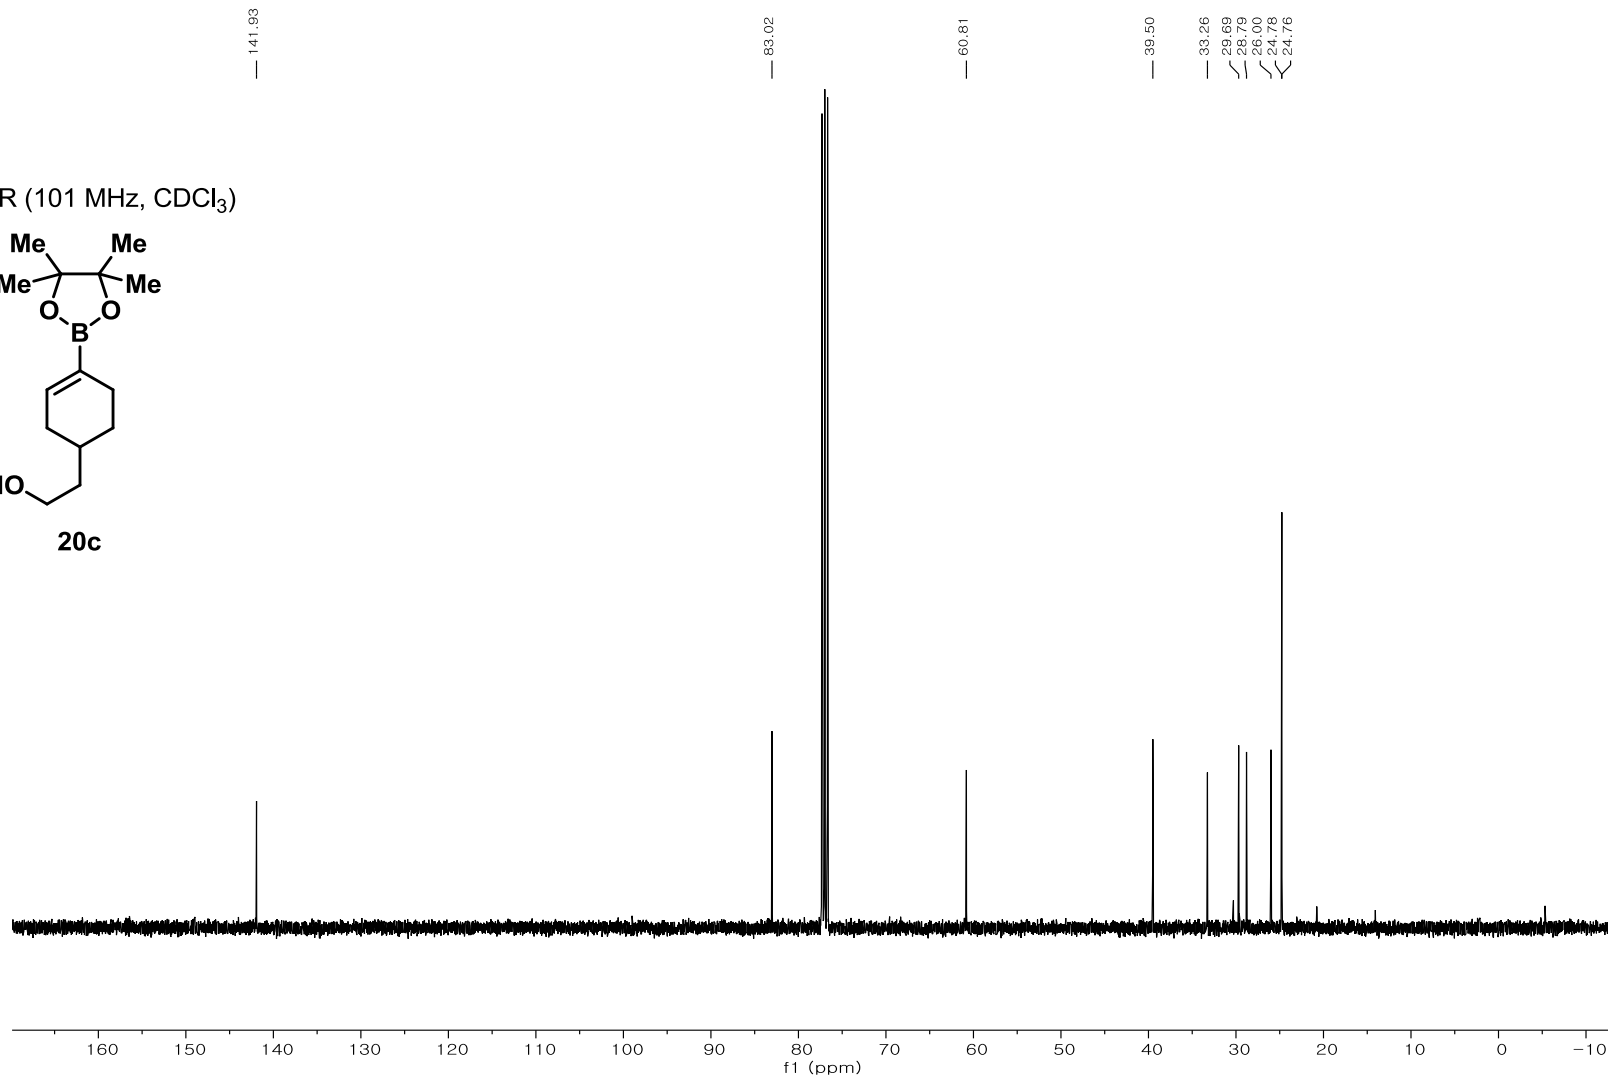



<sup>1</sup>H NMR (400 MHz, CDCl<sub>3</sub>)

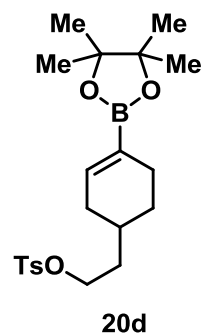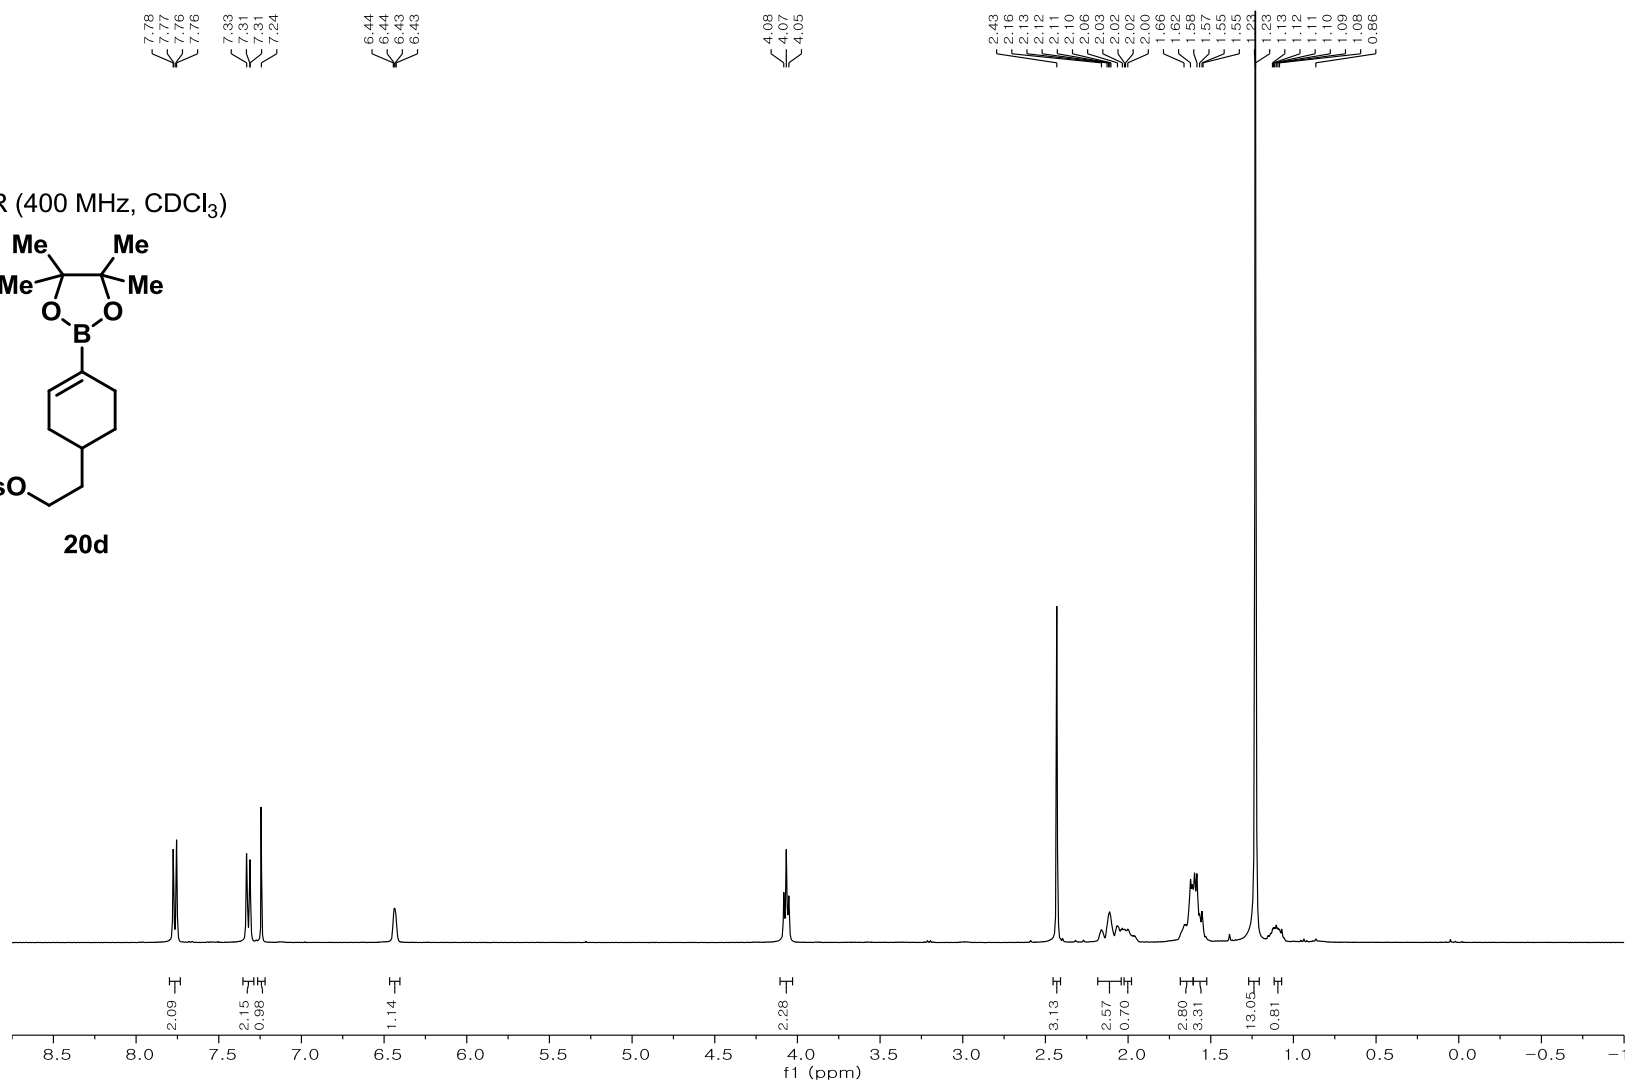

$^{13}\text{C}$  NMR (101 MHz,  $\text{CDCl}_3$ )

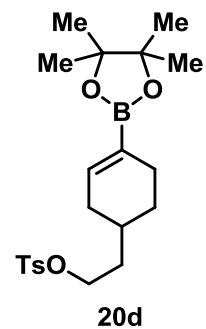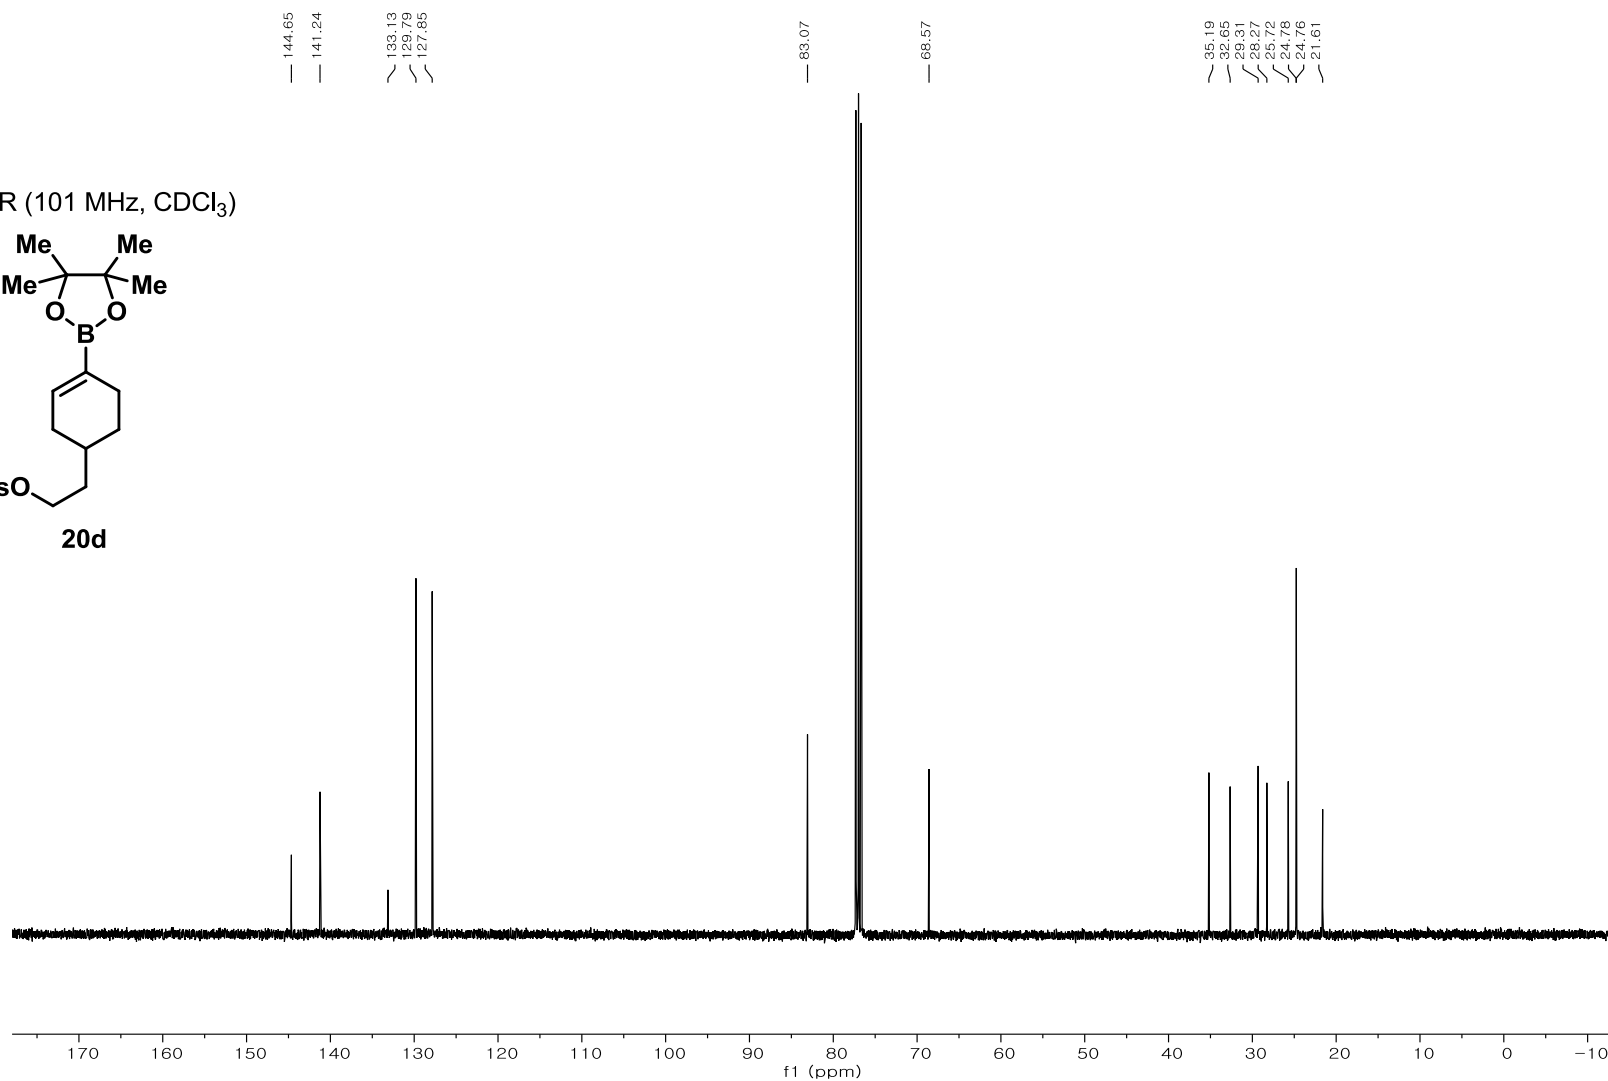

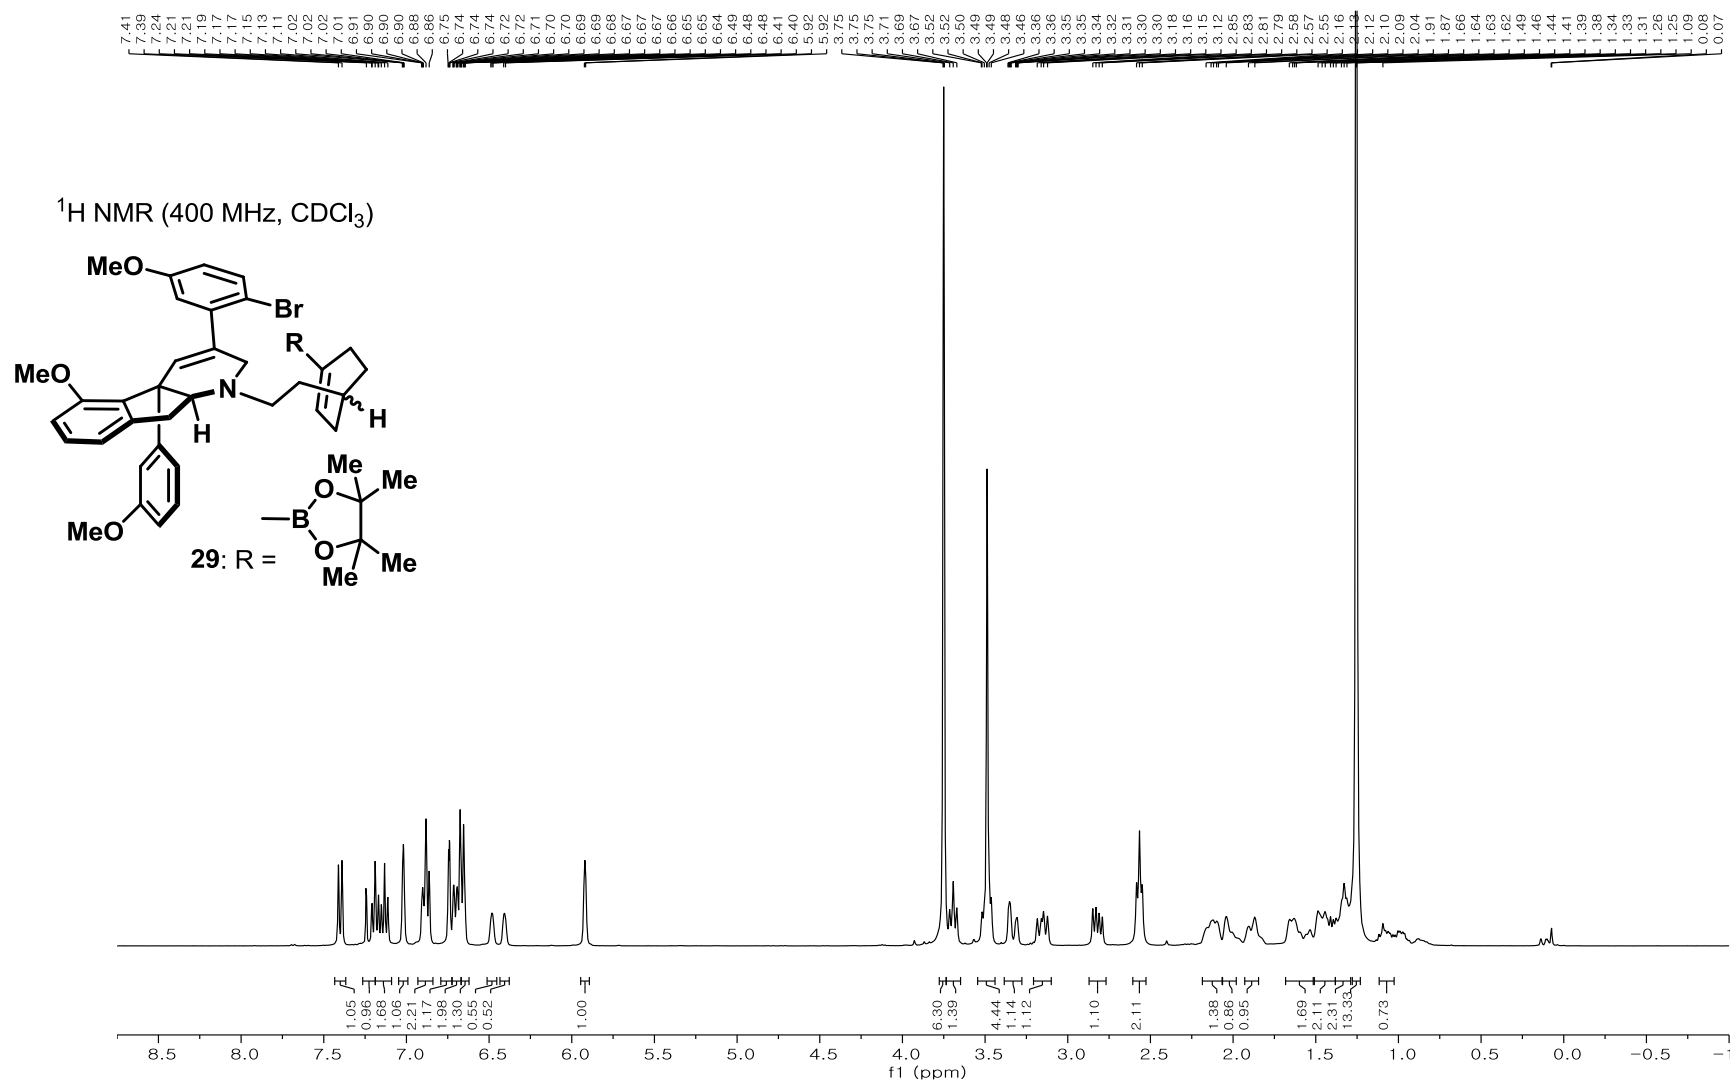

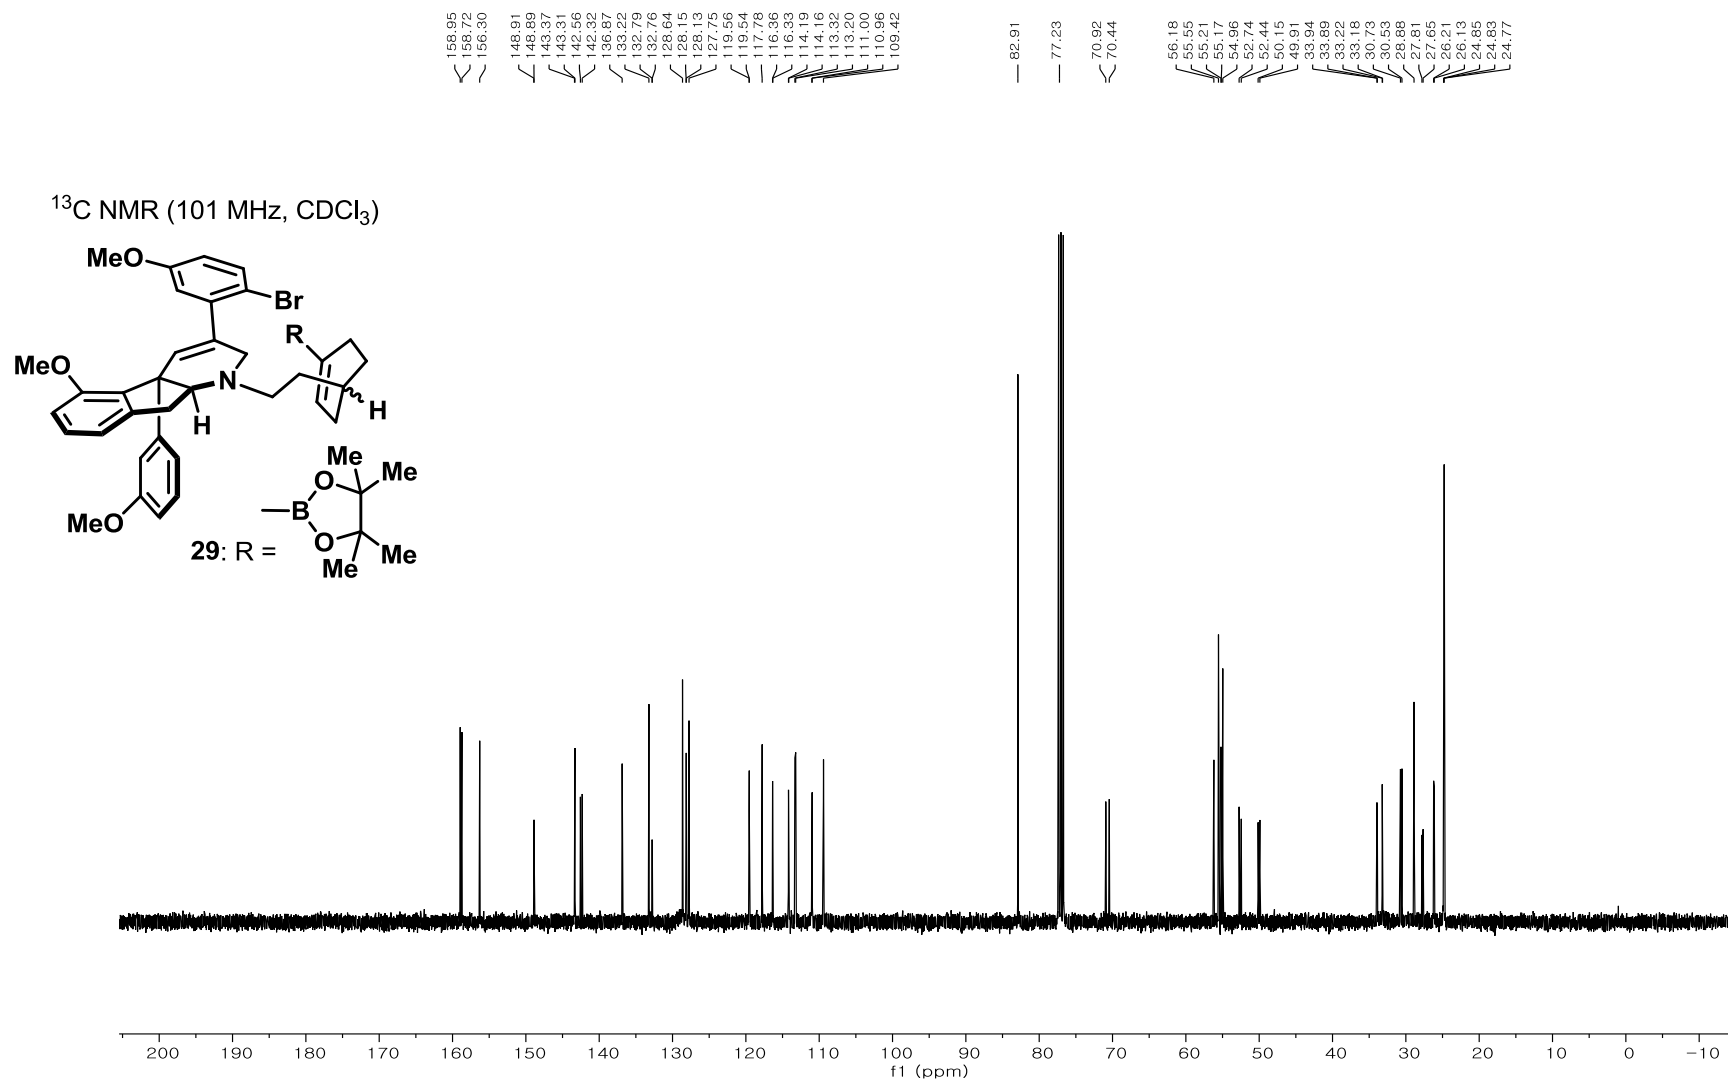

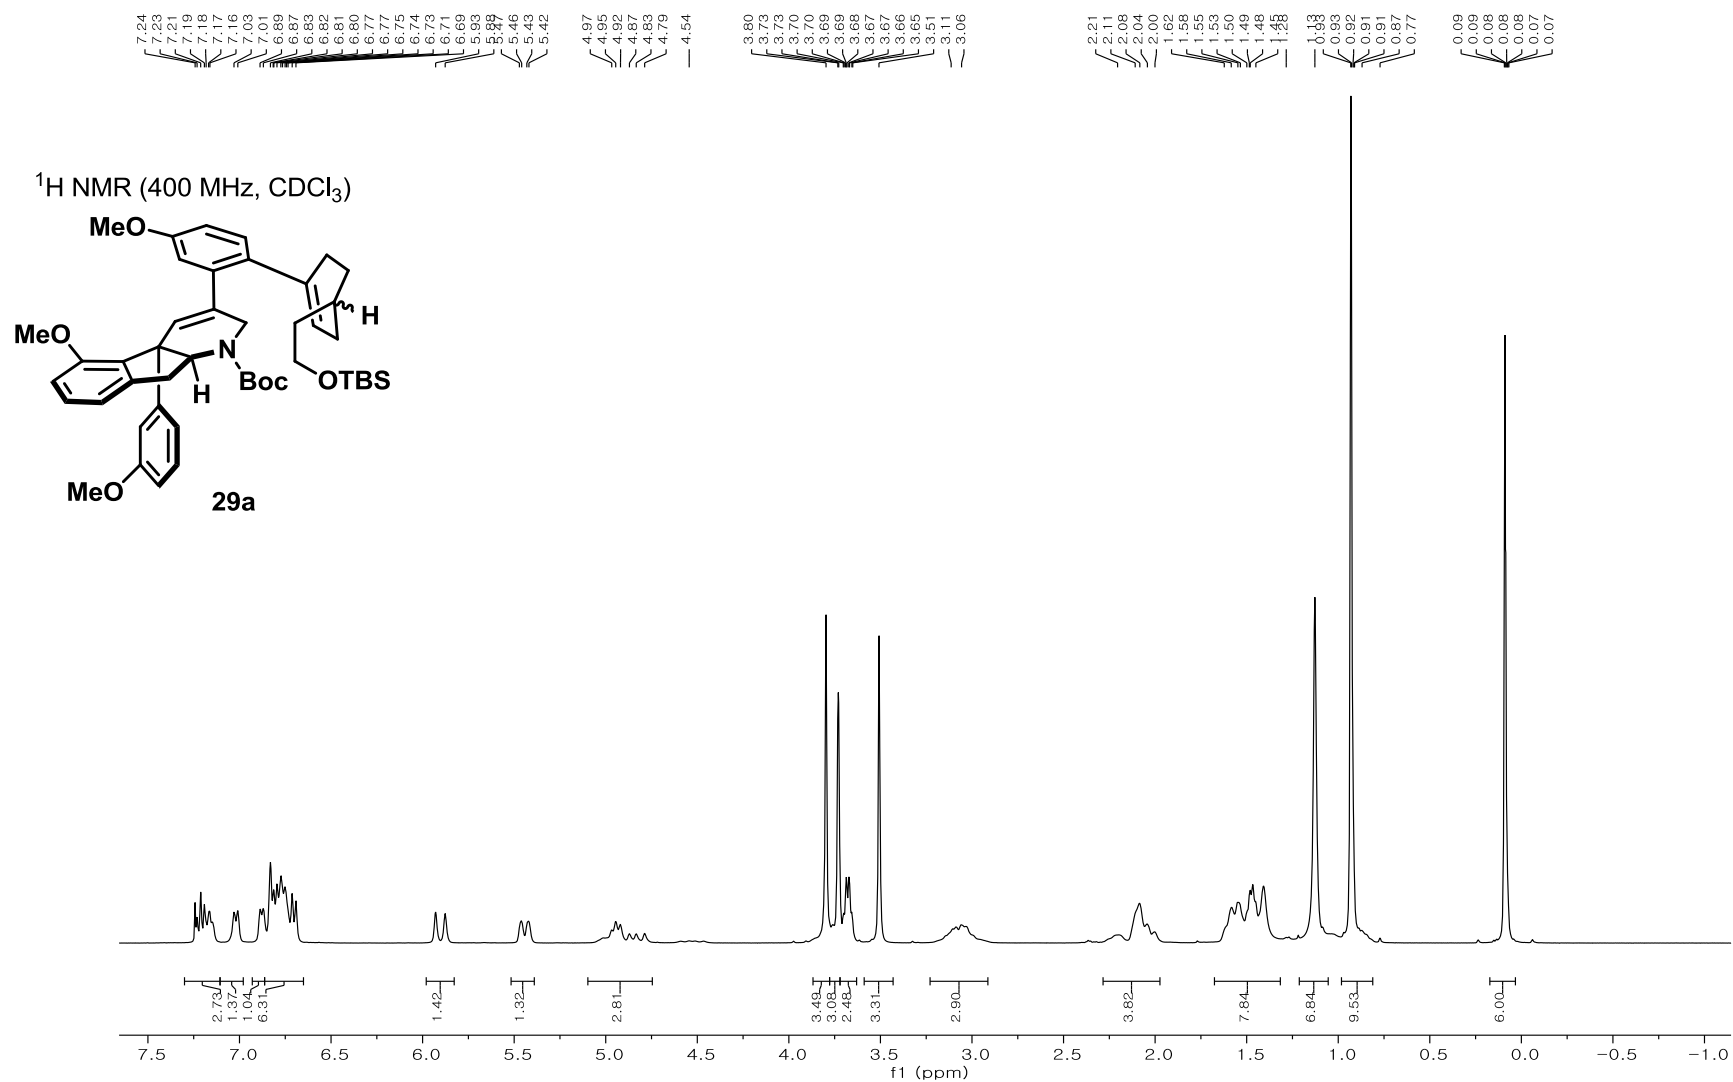

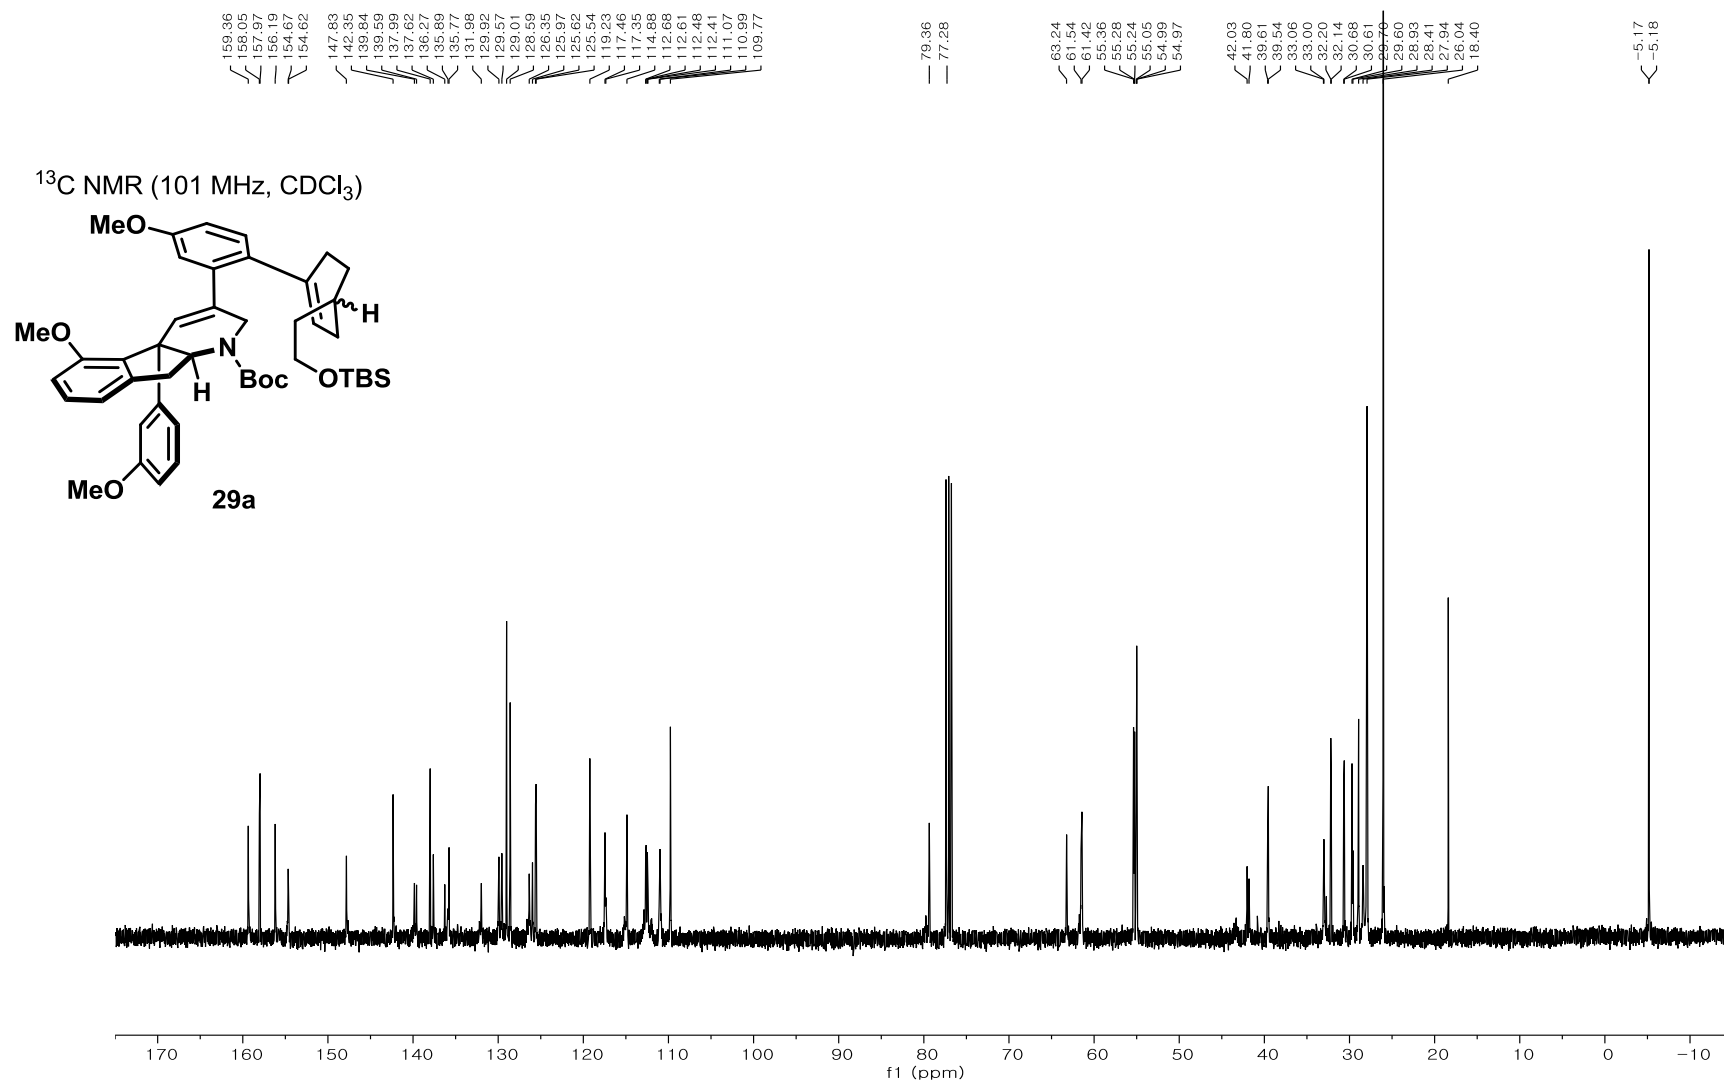

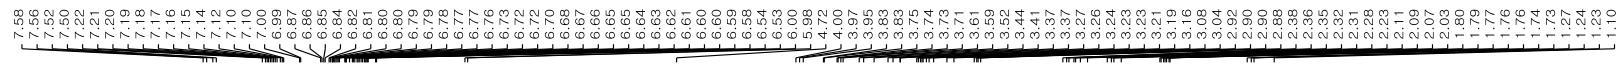

$^{13}\text{C}$  NMR (126 MHz,  $\text{CDCl}_3$ )

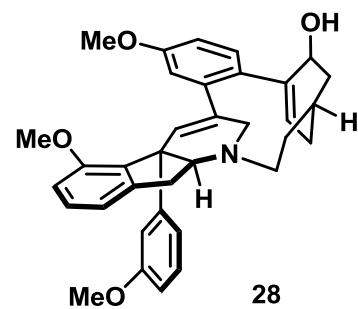

+

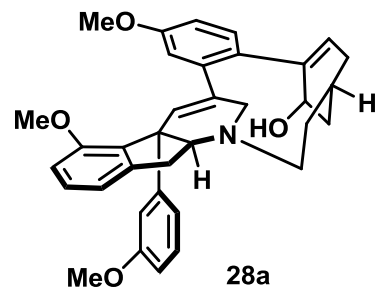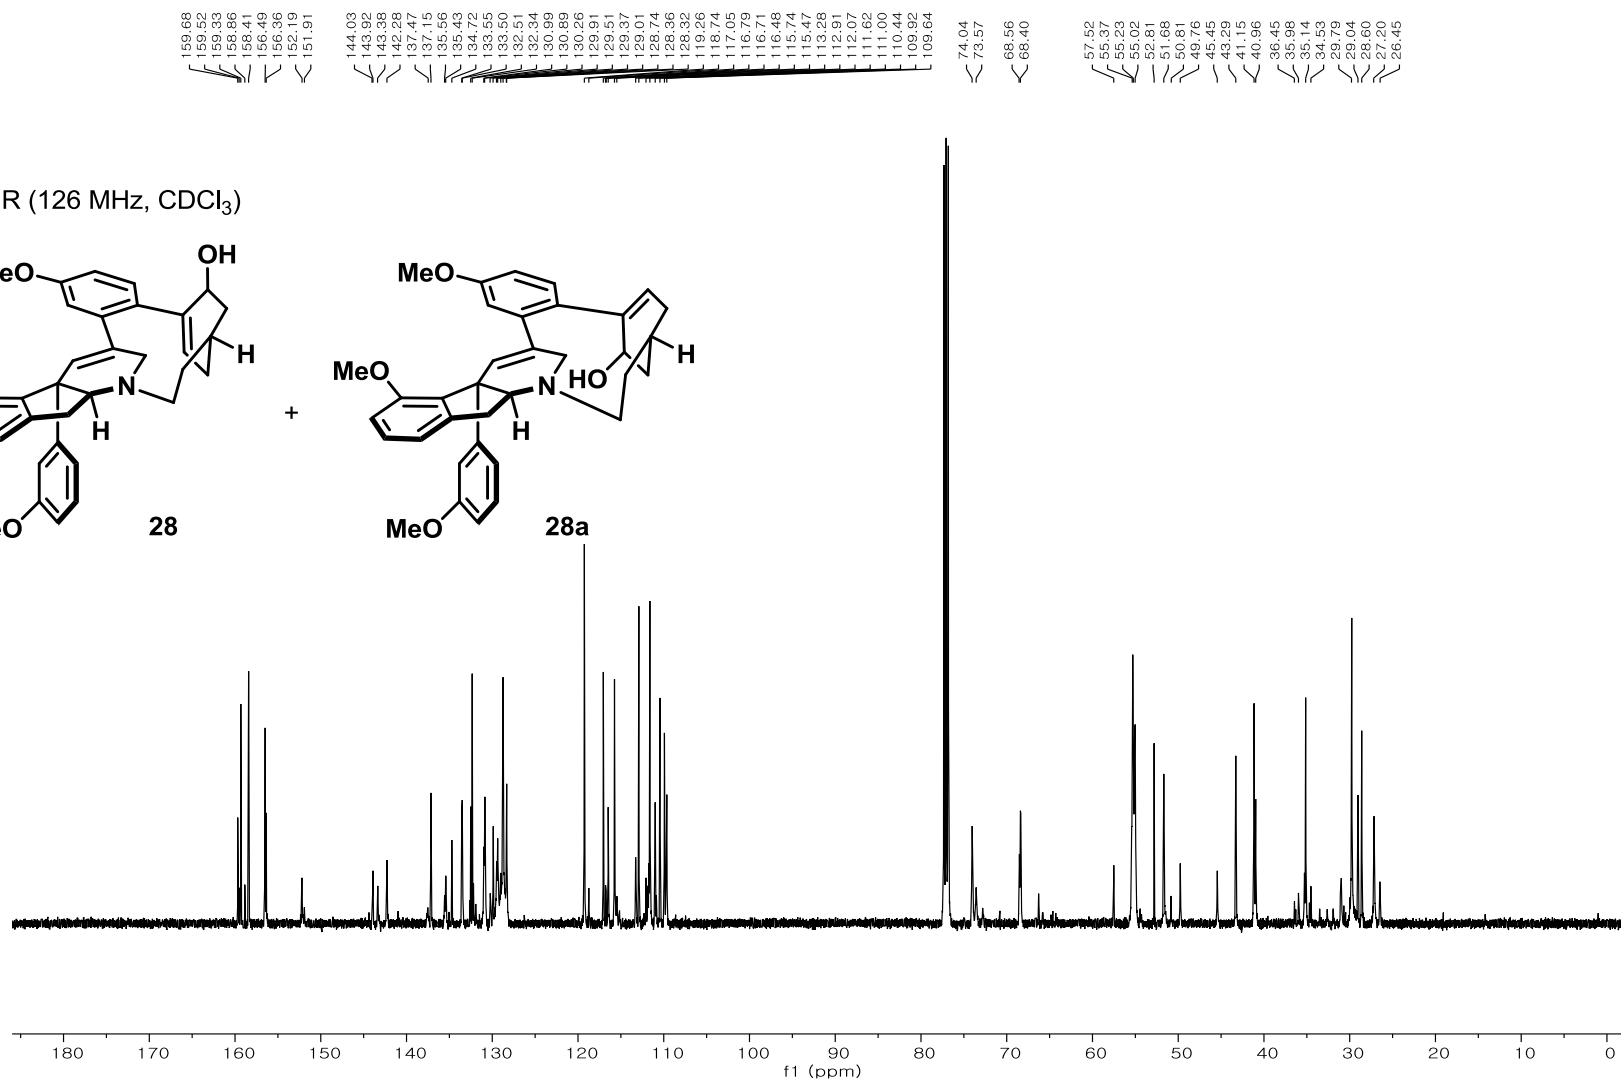



<sup>1</sup>H NMR (400 MHz, CDCl<sub>3</sub>)

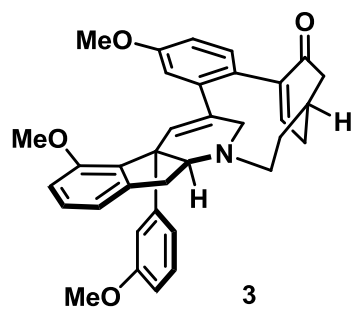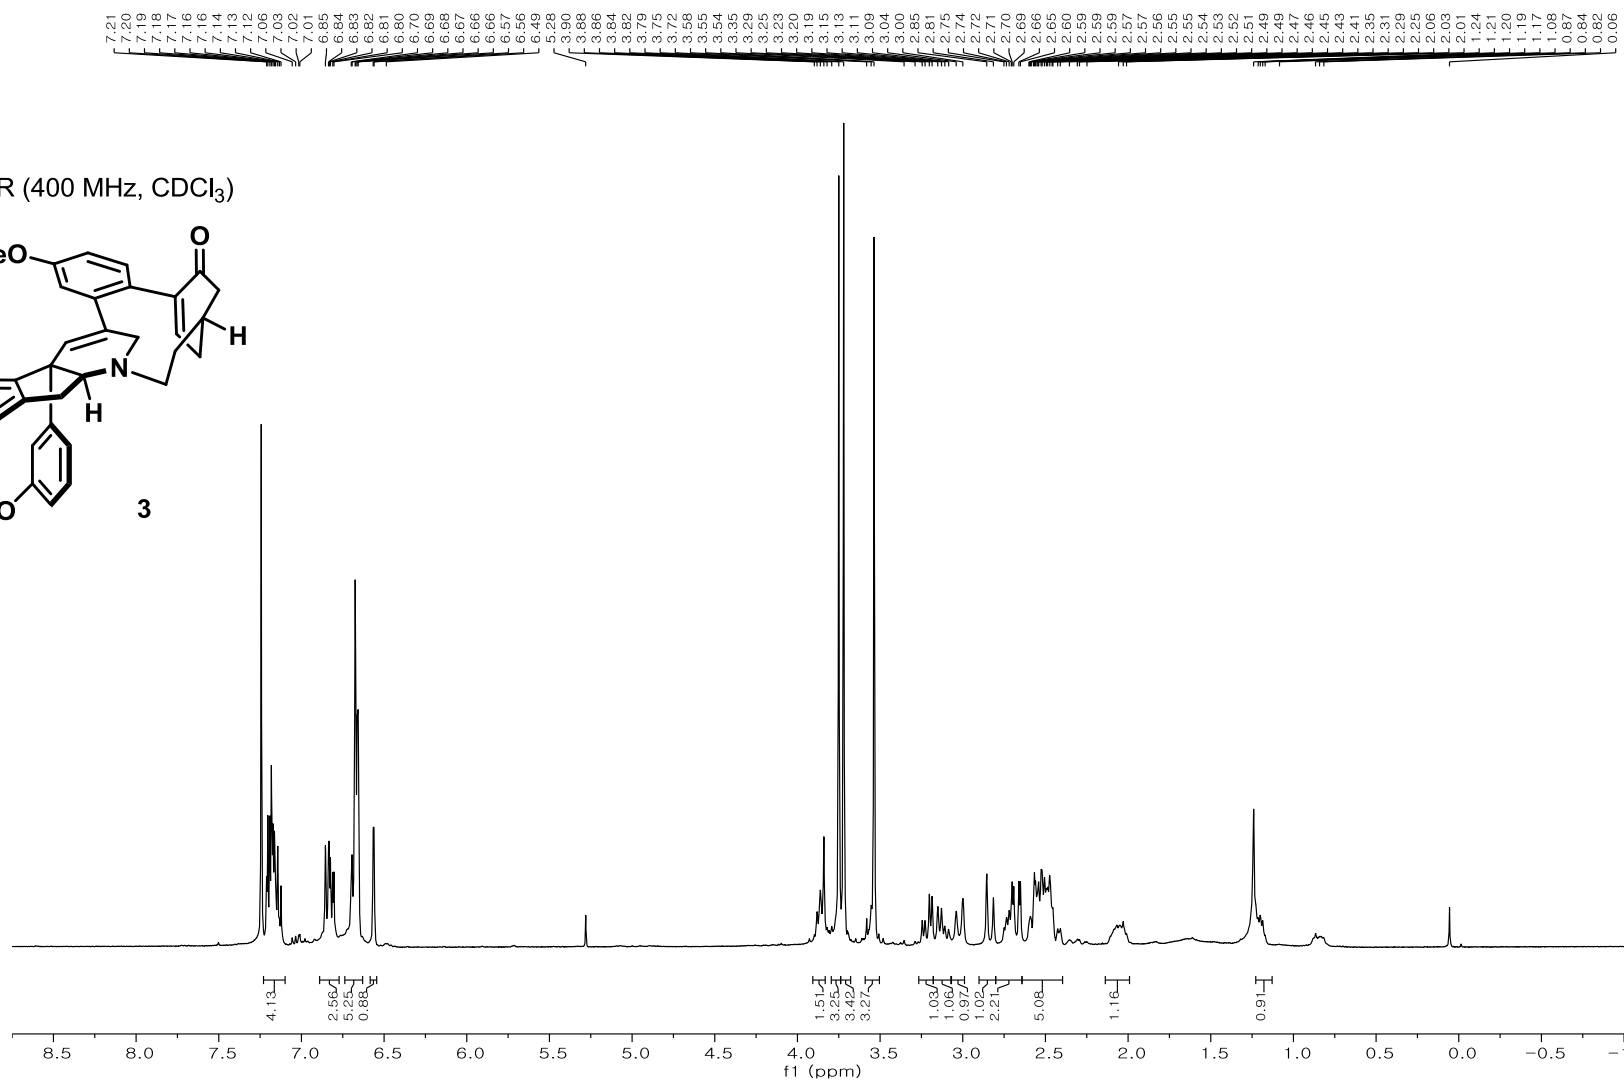

$^{13}\text{C}$  NMR (101 MHz,  $\text{CDCl}_3$ )

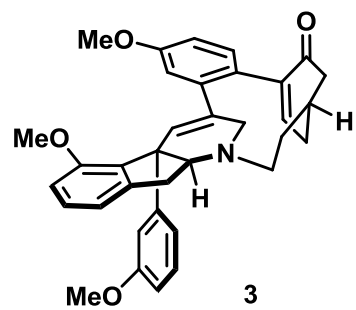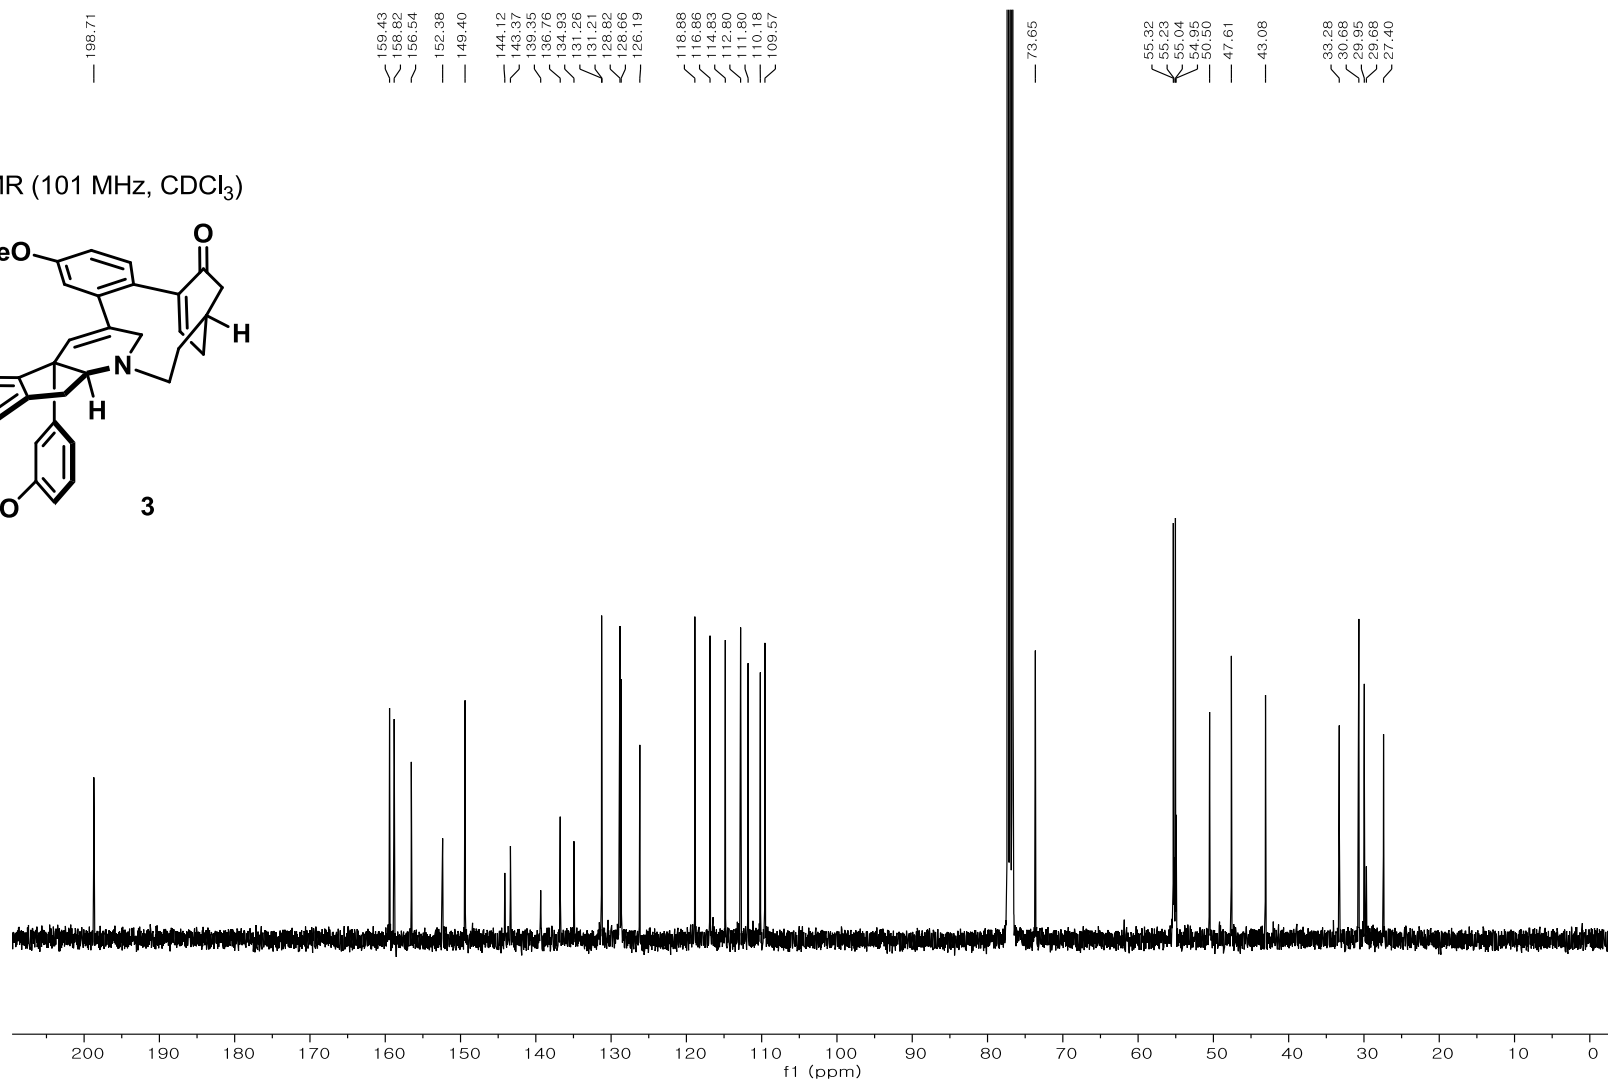

<sup>1</sup>H NMR (400 MHz, CDCl<sub>3</sub>)

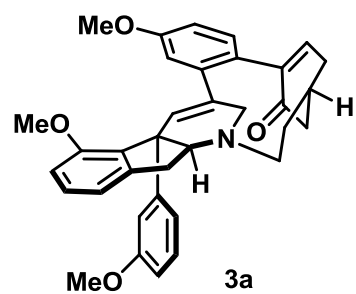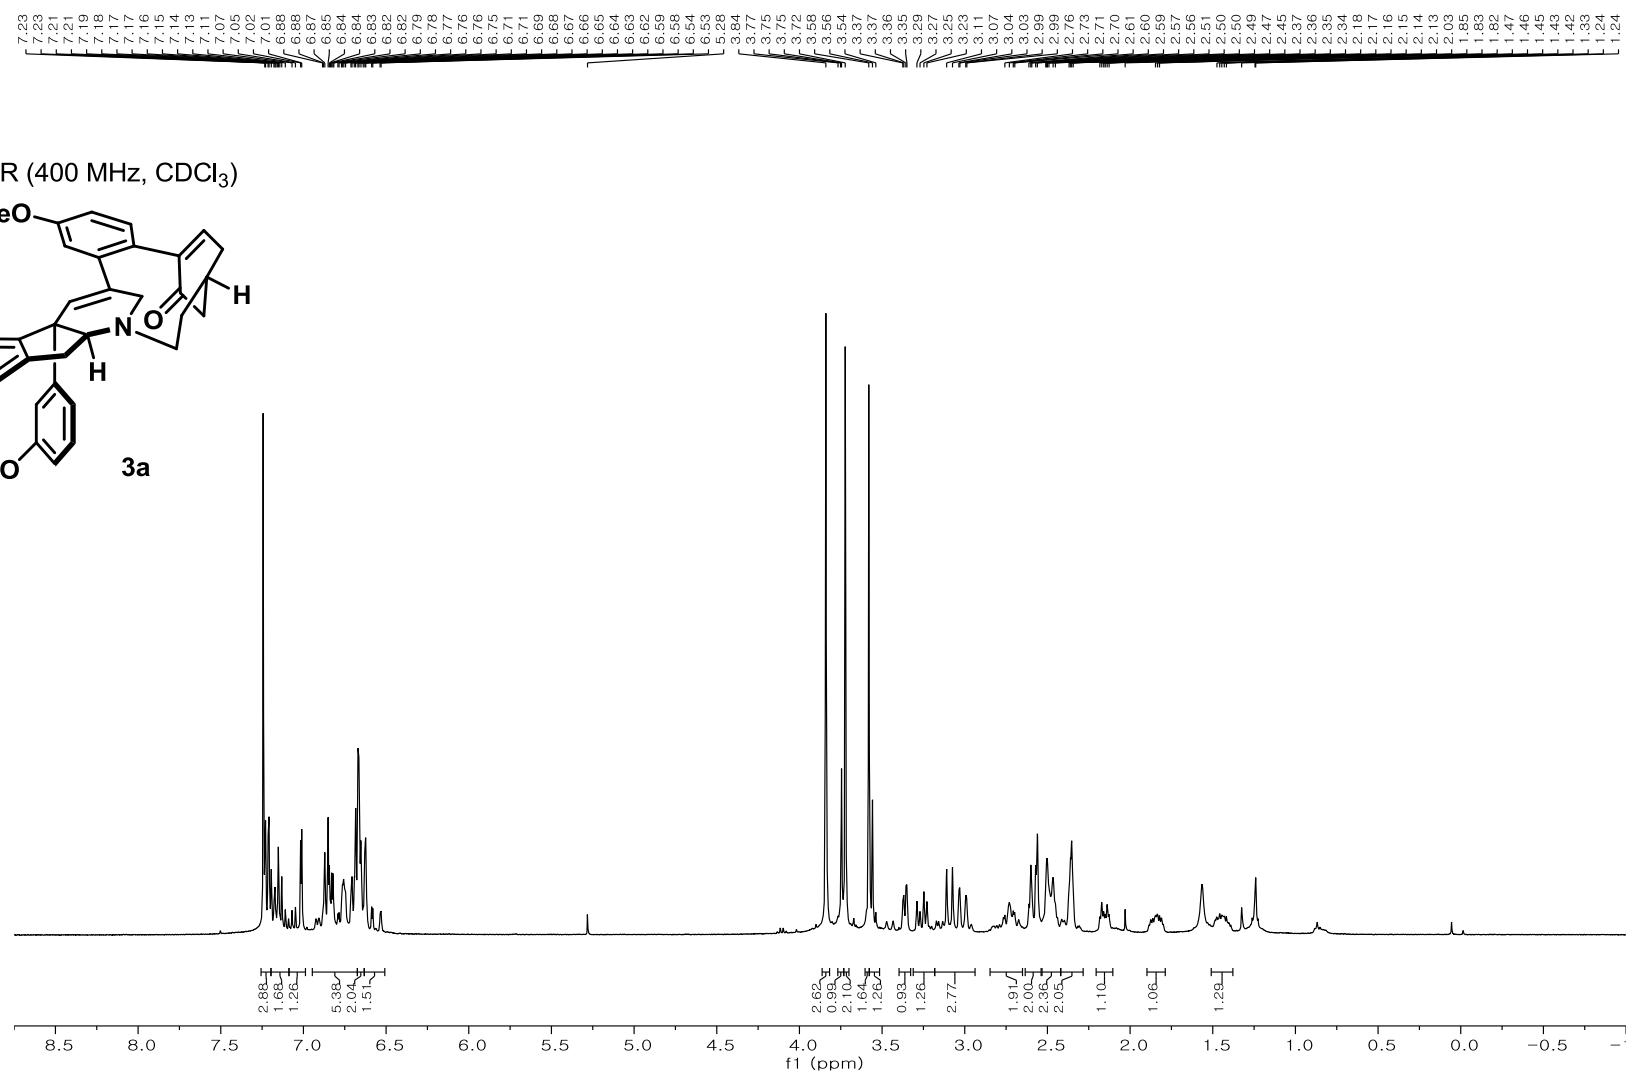

$^{13}\text{C}$  NMR (101 MHz,  $\text{CDCl}_3$ )

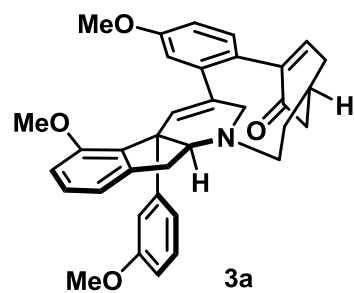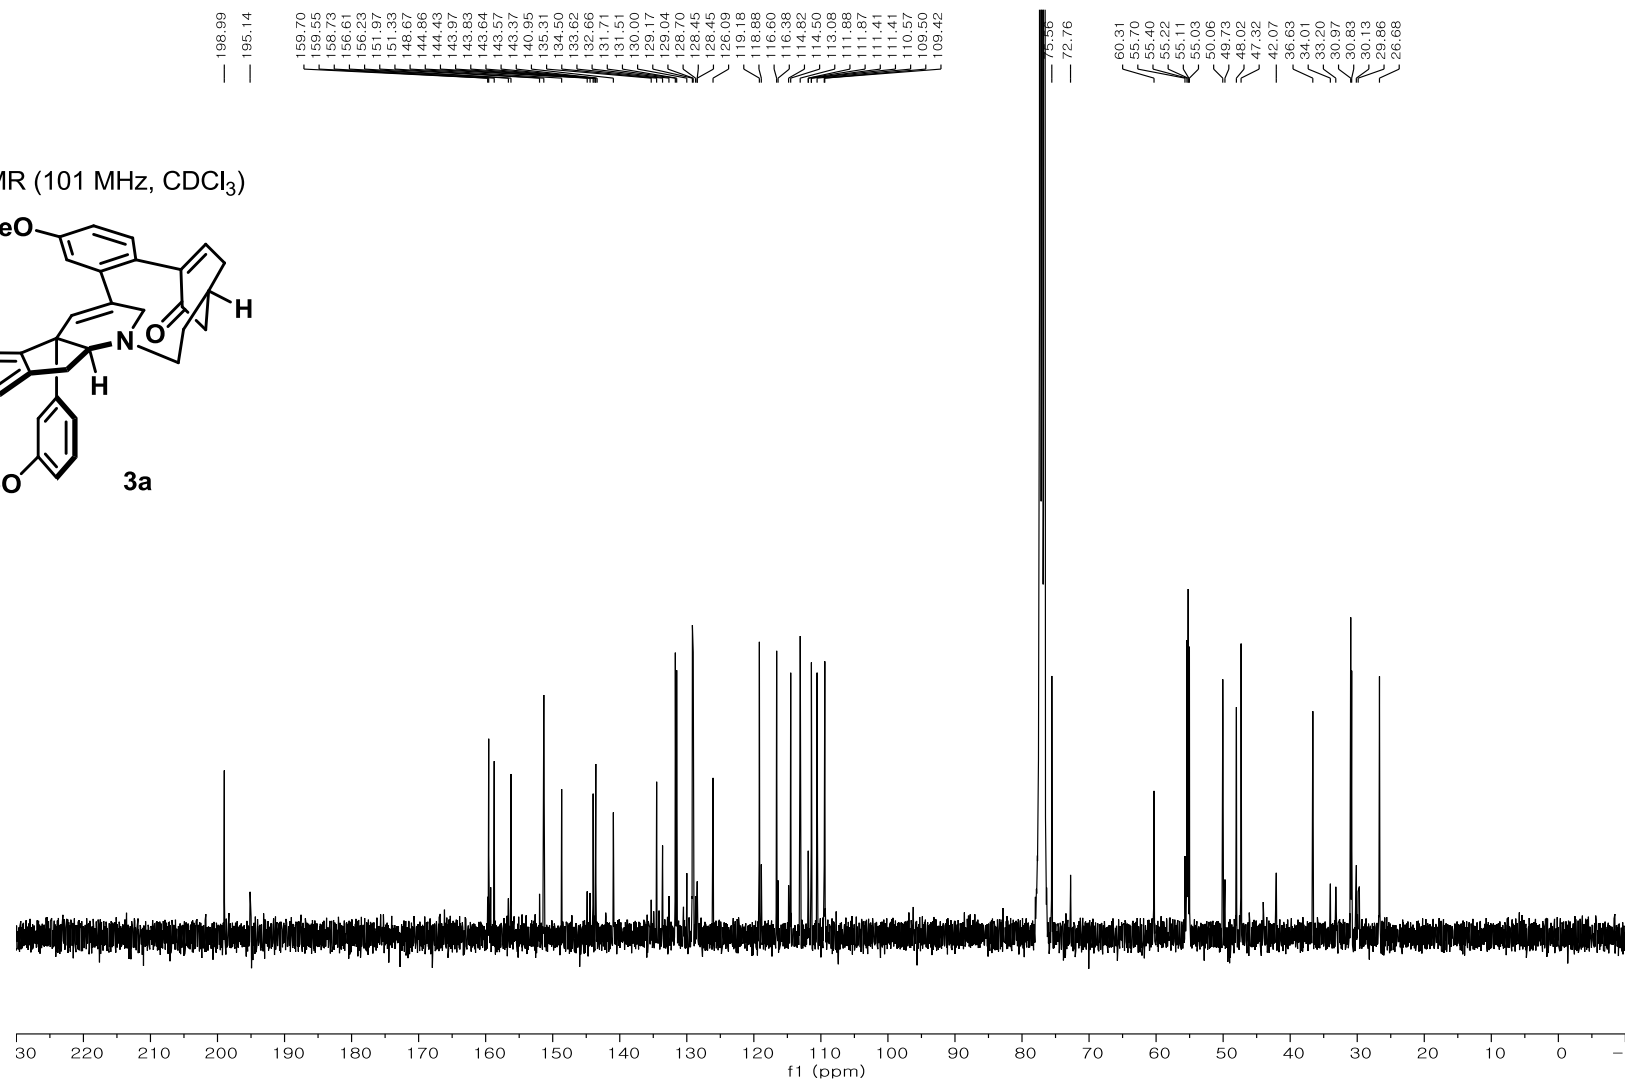

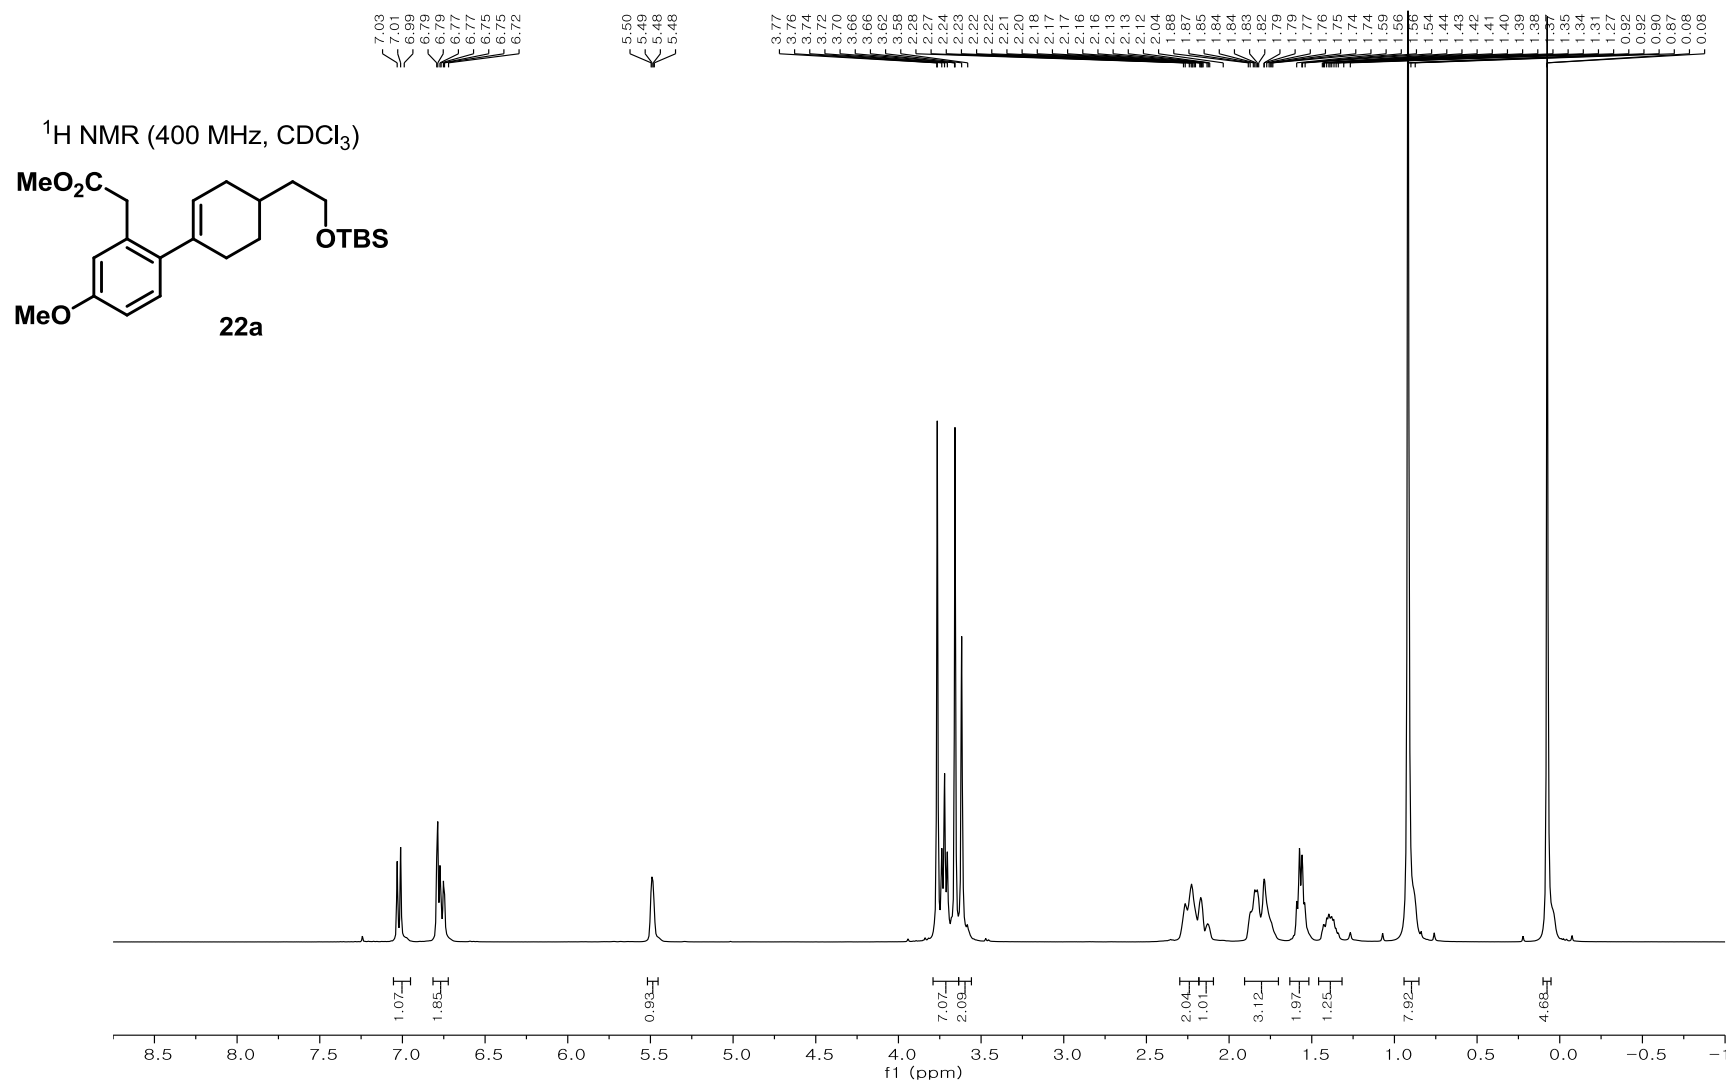

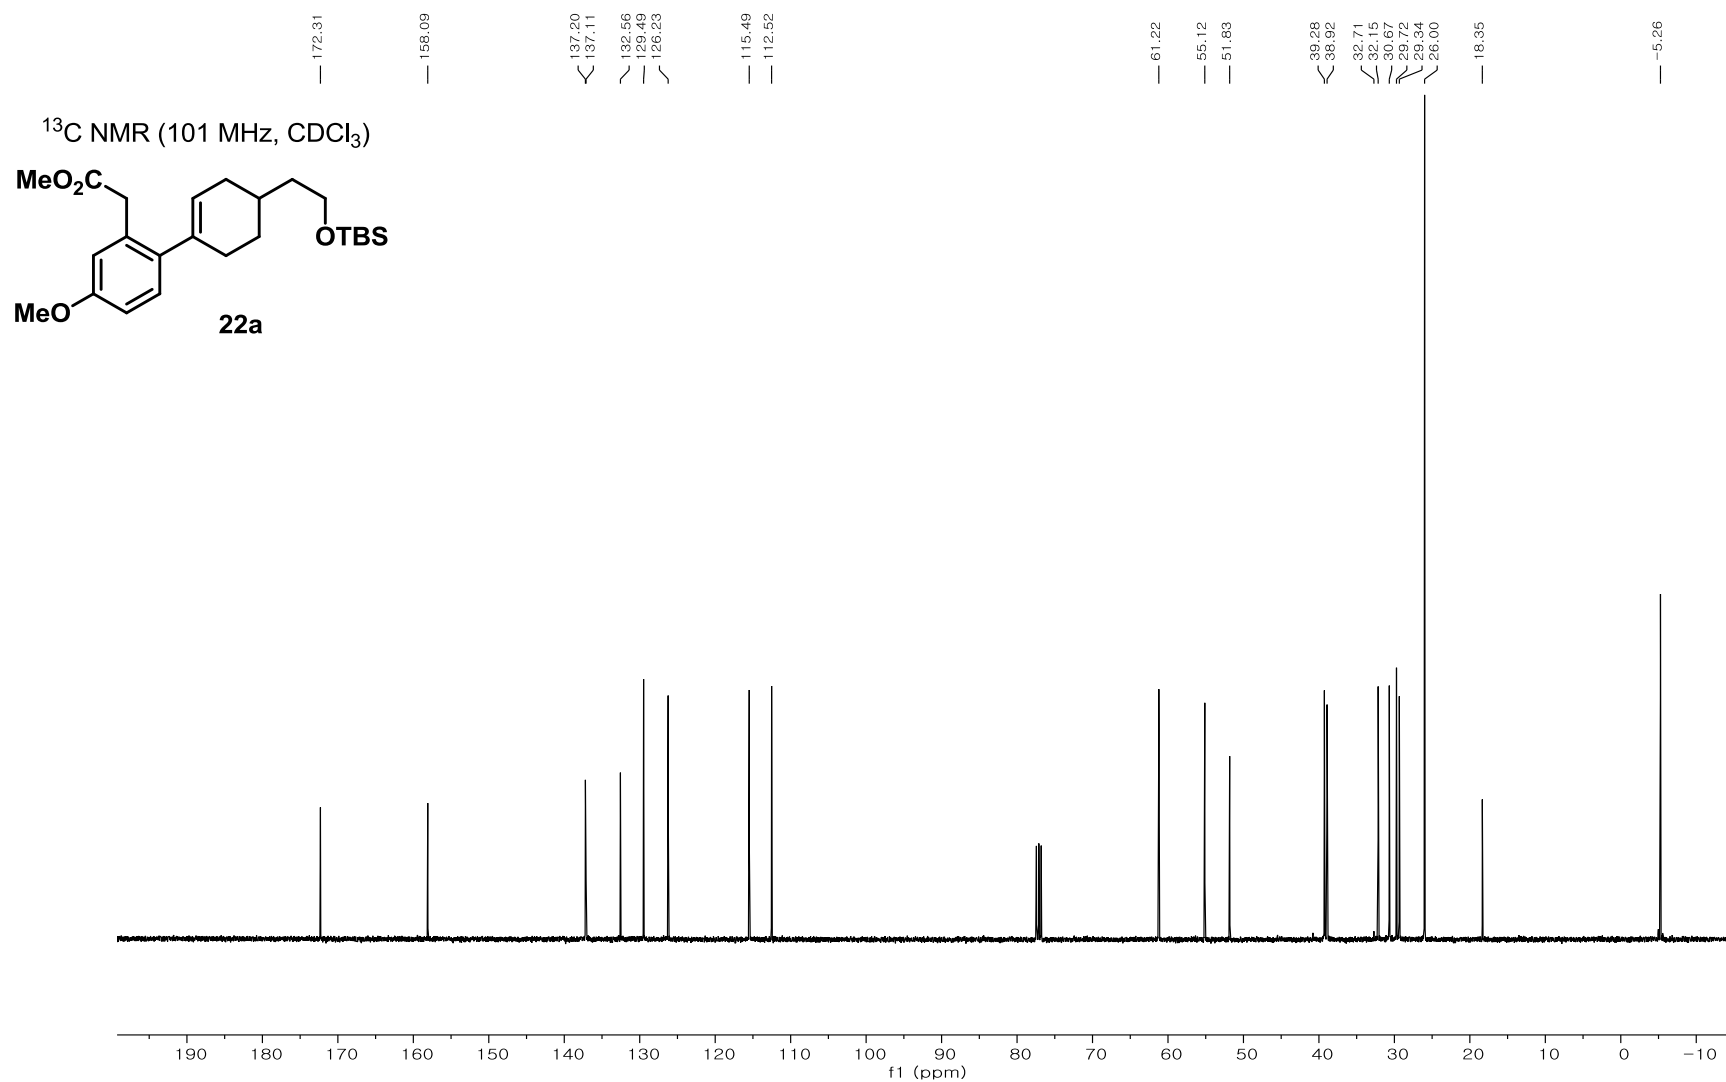







<sup>1</sup>H NMR (400 MHz, CDCl<sub>3</sub>)

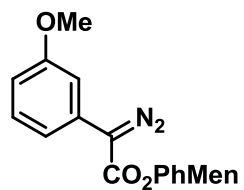

(PhMen = L-8-phenylmenthyl)

**5a**

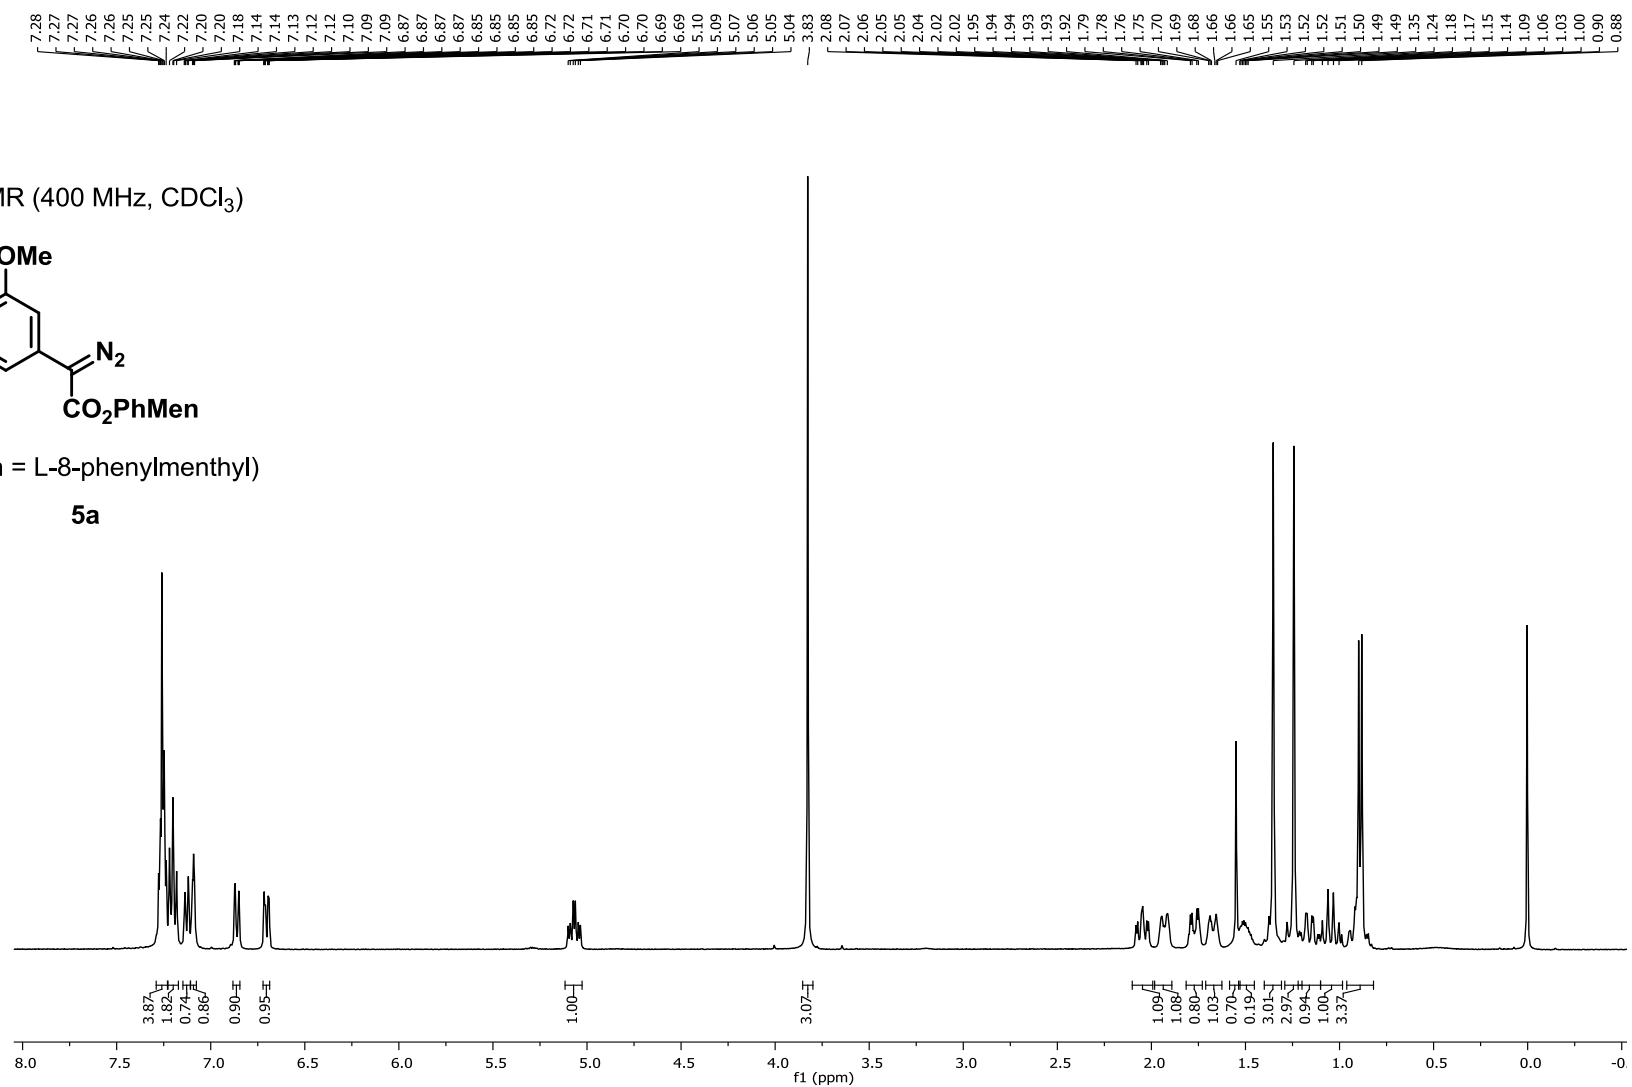

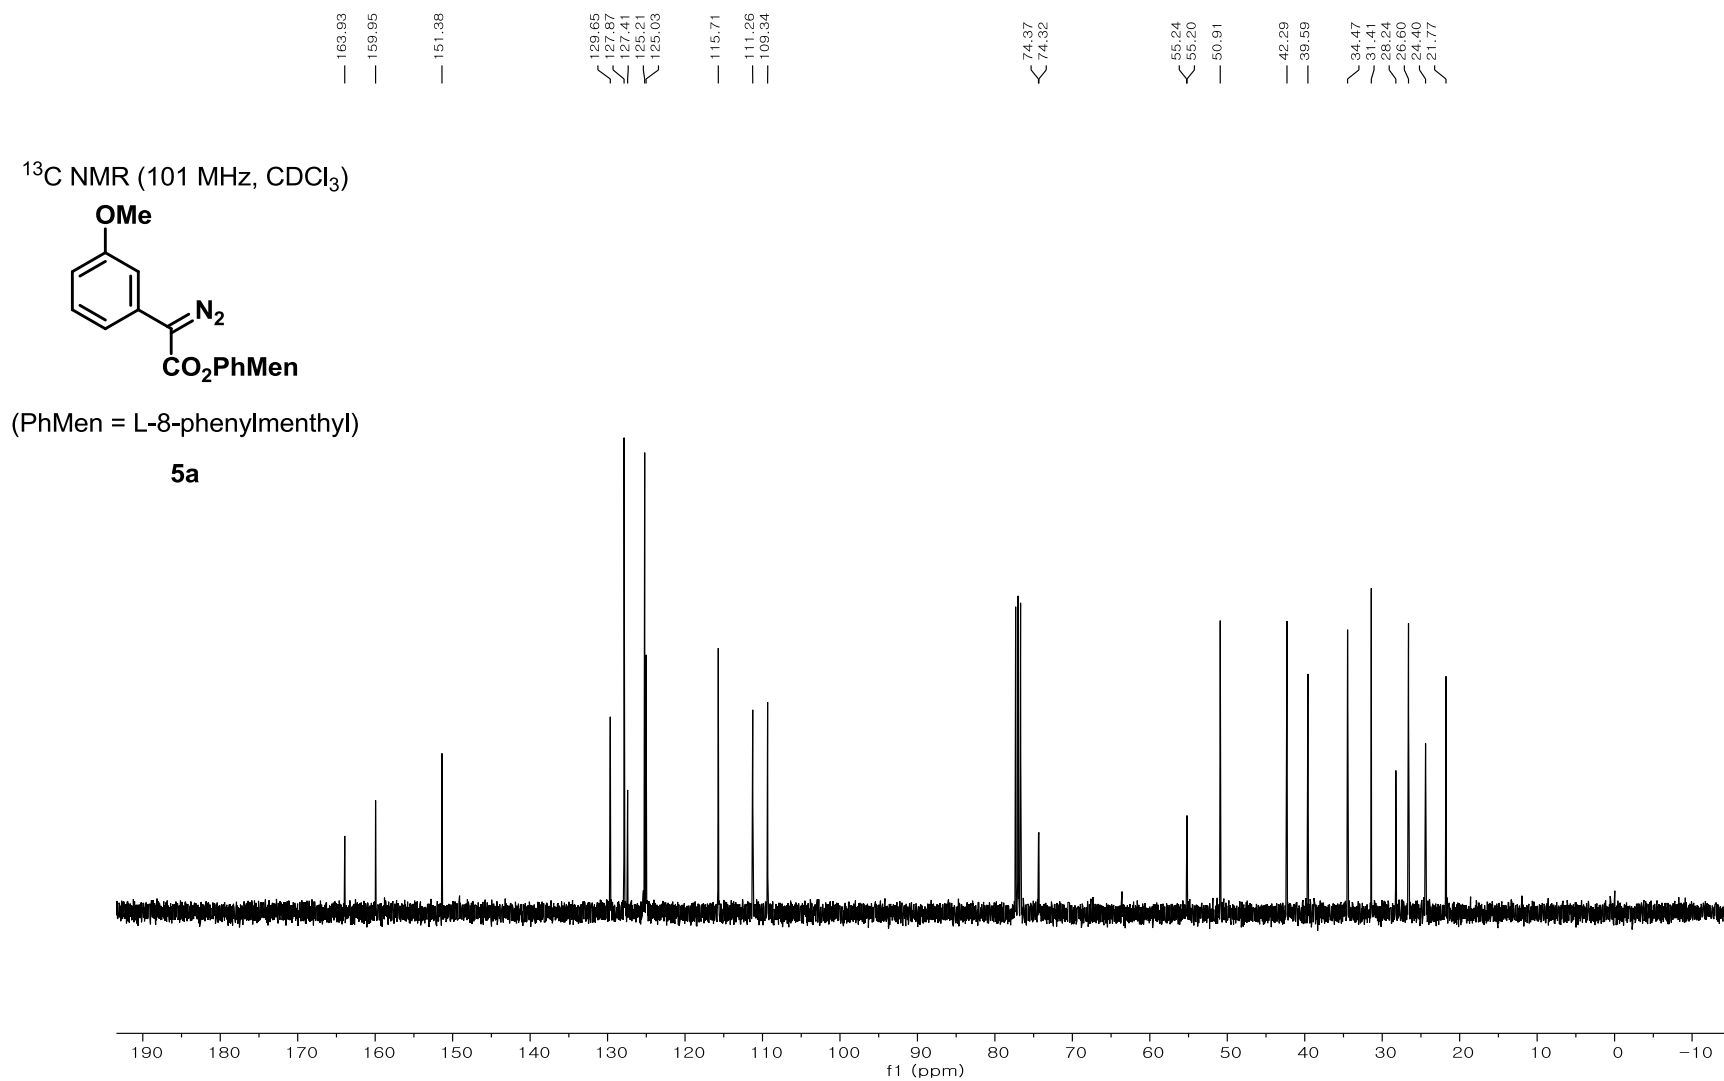

$^1\text{H}$  NMR (400 MHz,  $\text{CDCl}_3$ )

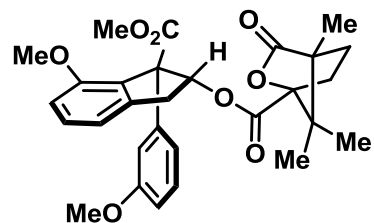

**31a:** Less polar diastereoisomer

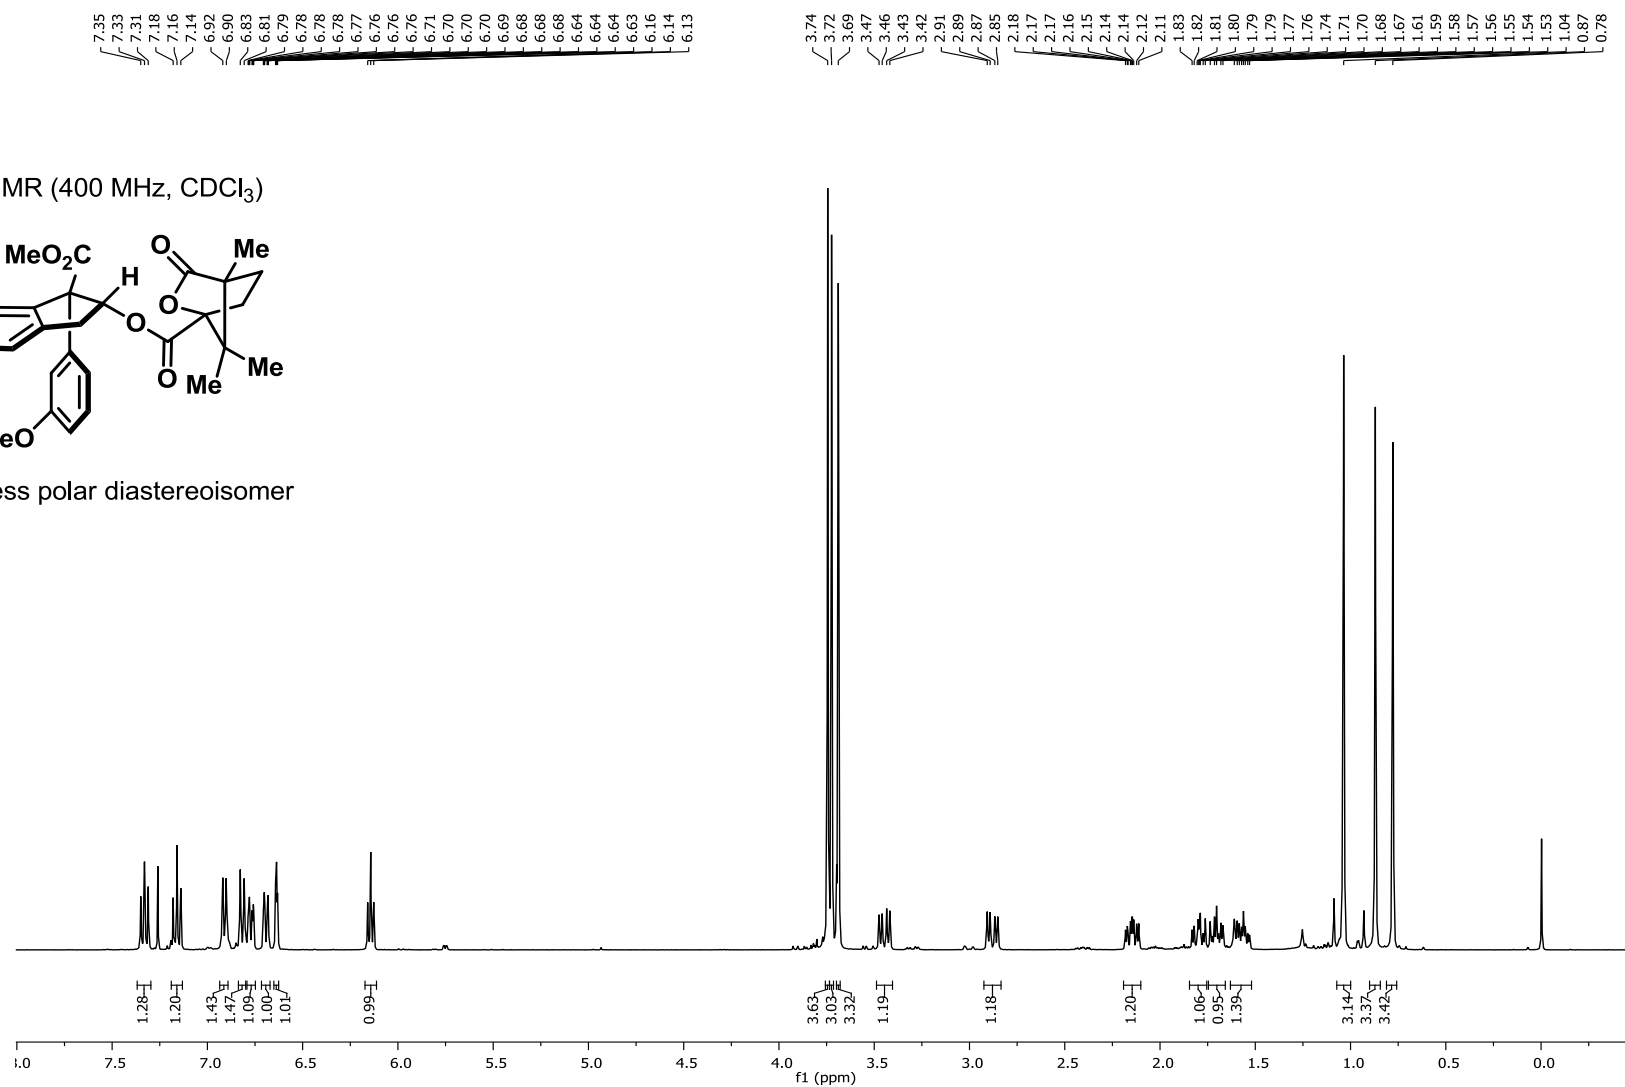

$^{13}\text{C}$  NMR (101 MHz,  $\text{CDCl}_3$ )

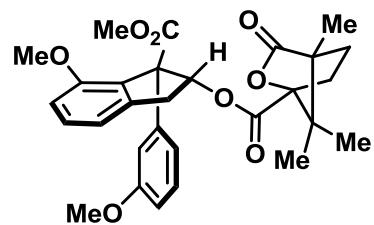

**31a:** Less polar diastereoisomer

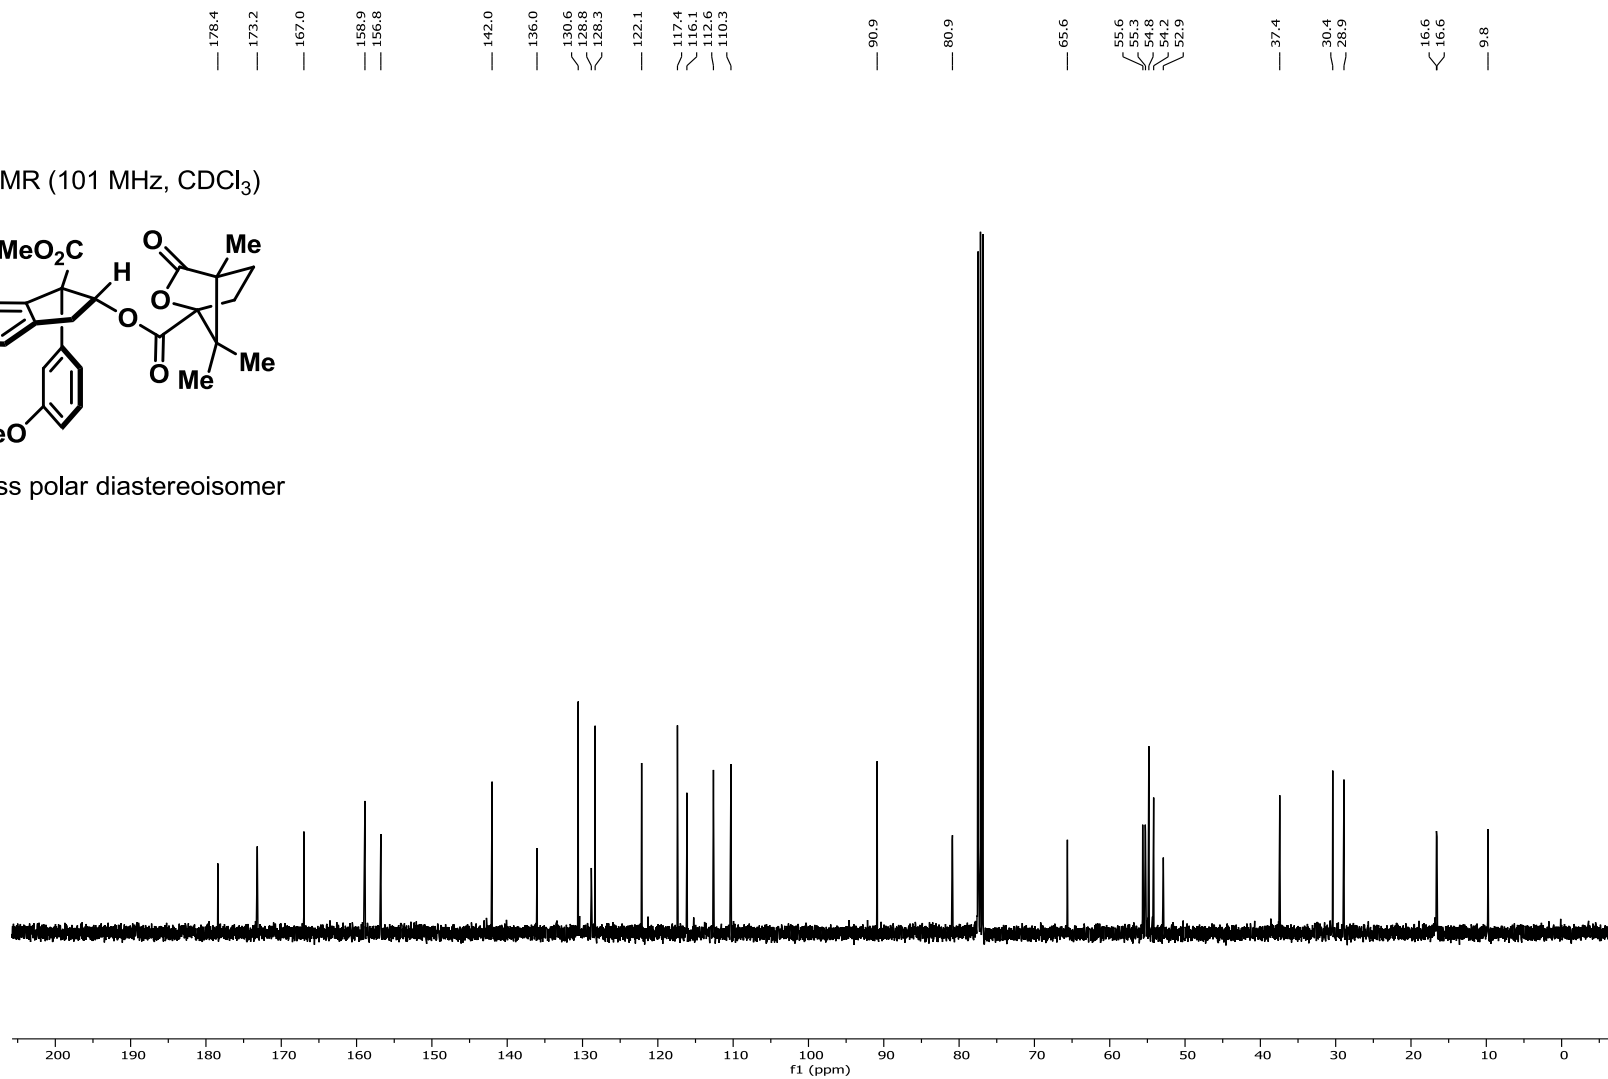

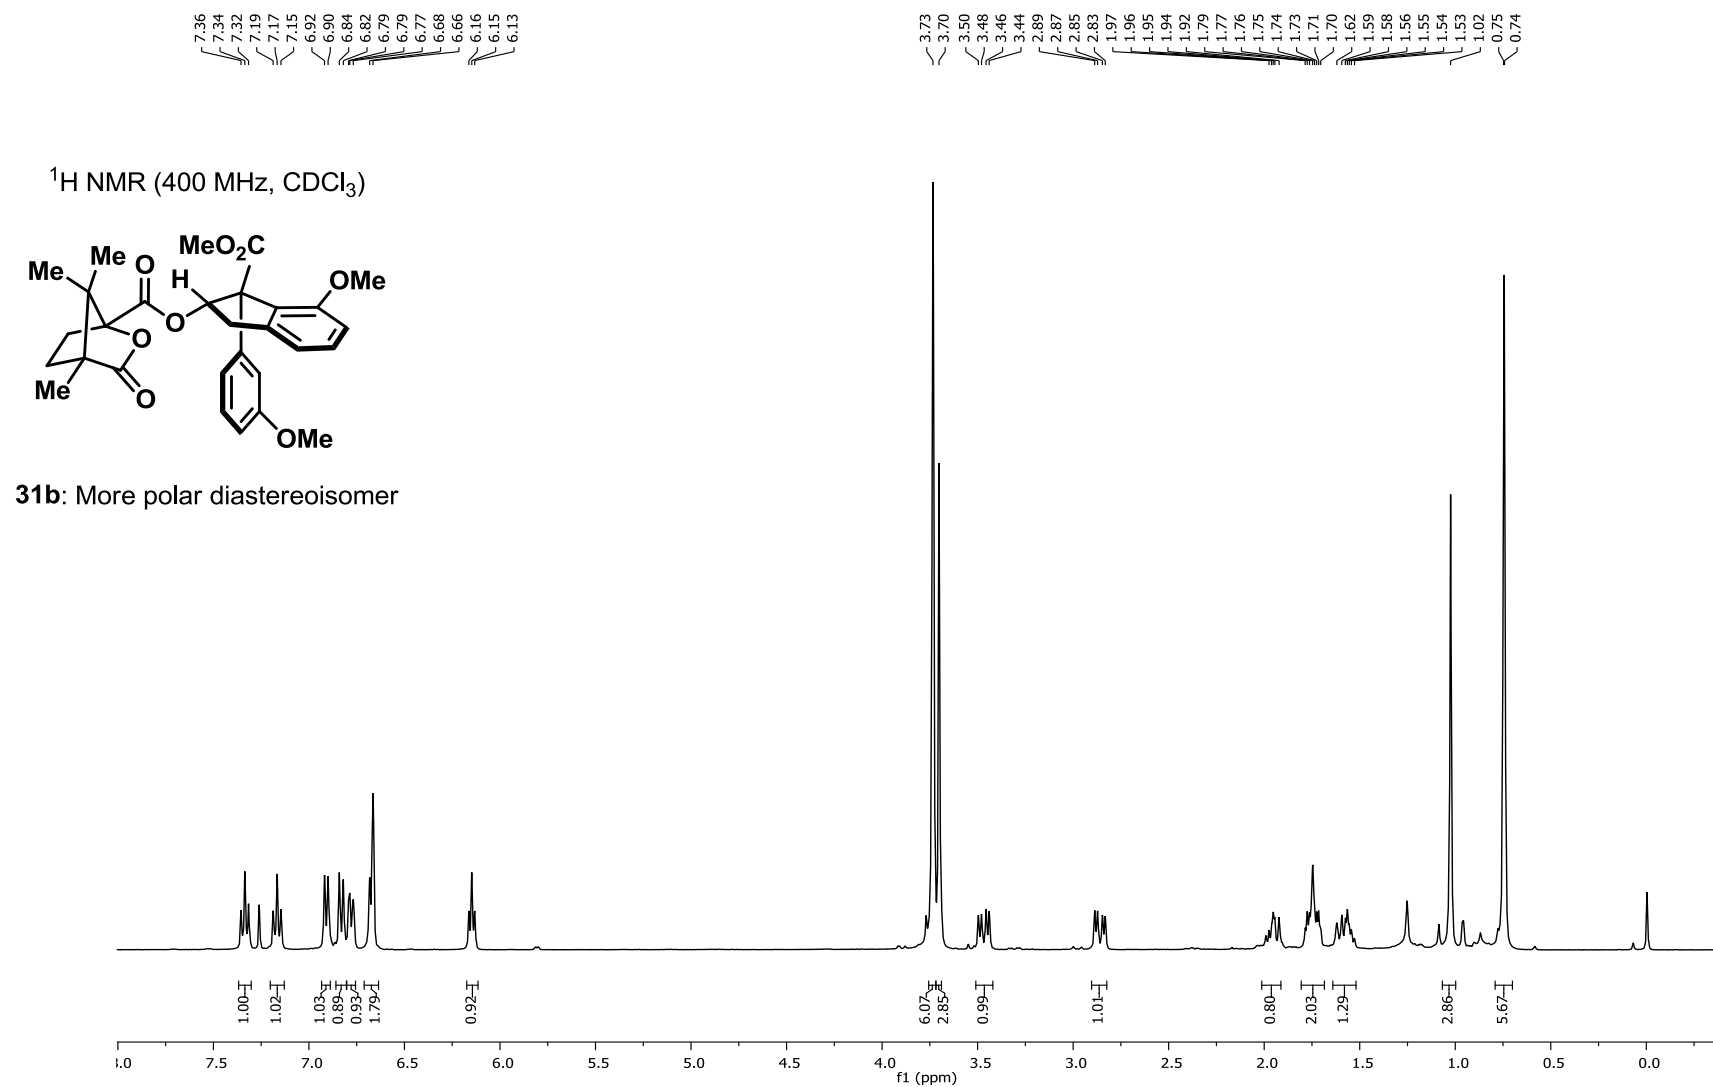

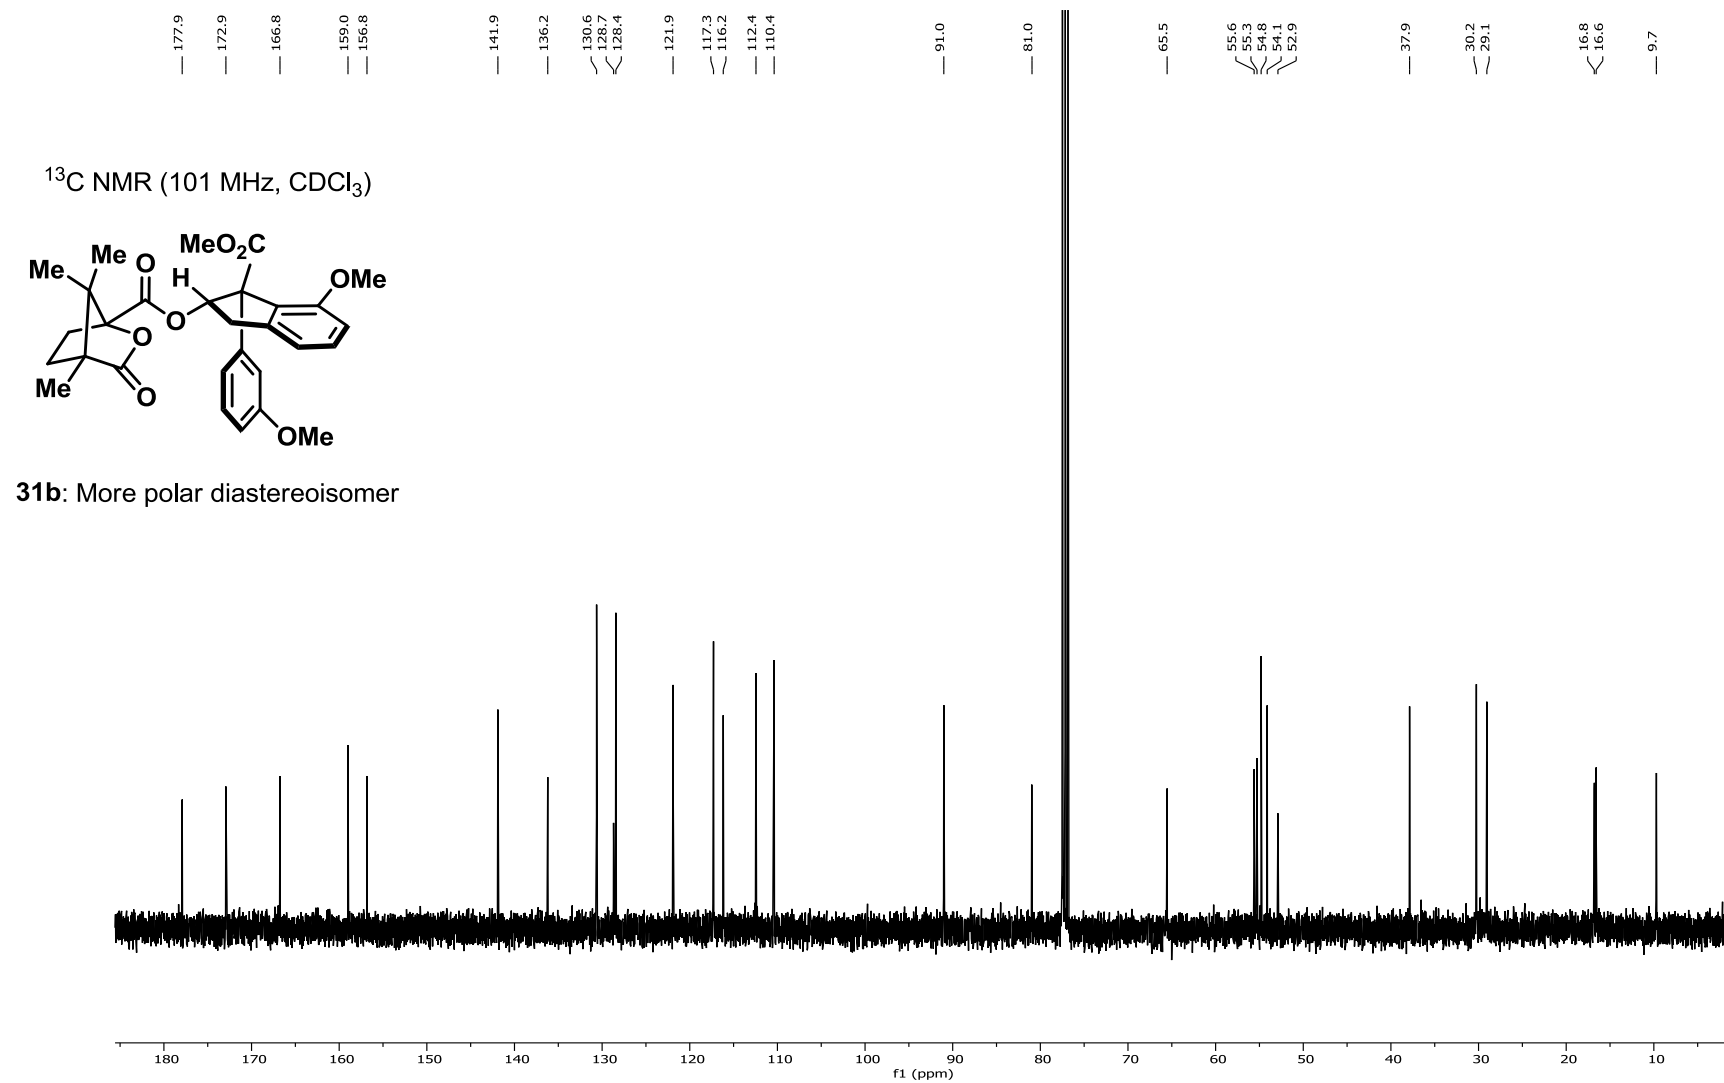

<sup>1</sup>H NMR (400 MHz, CDCl<sub>3</sub>)

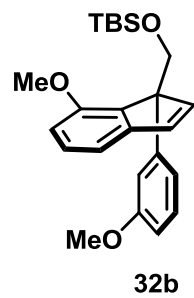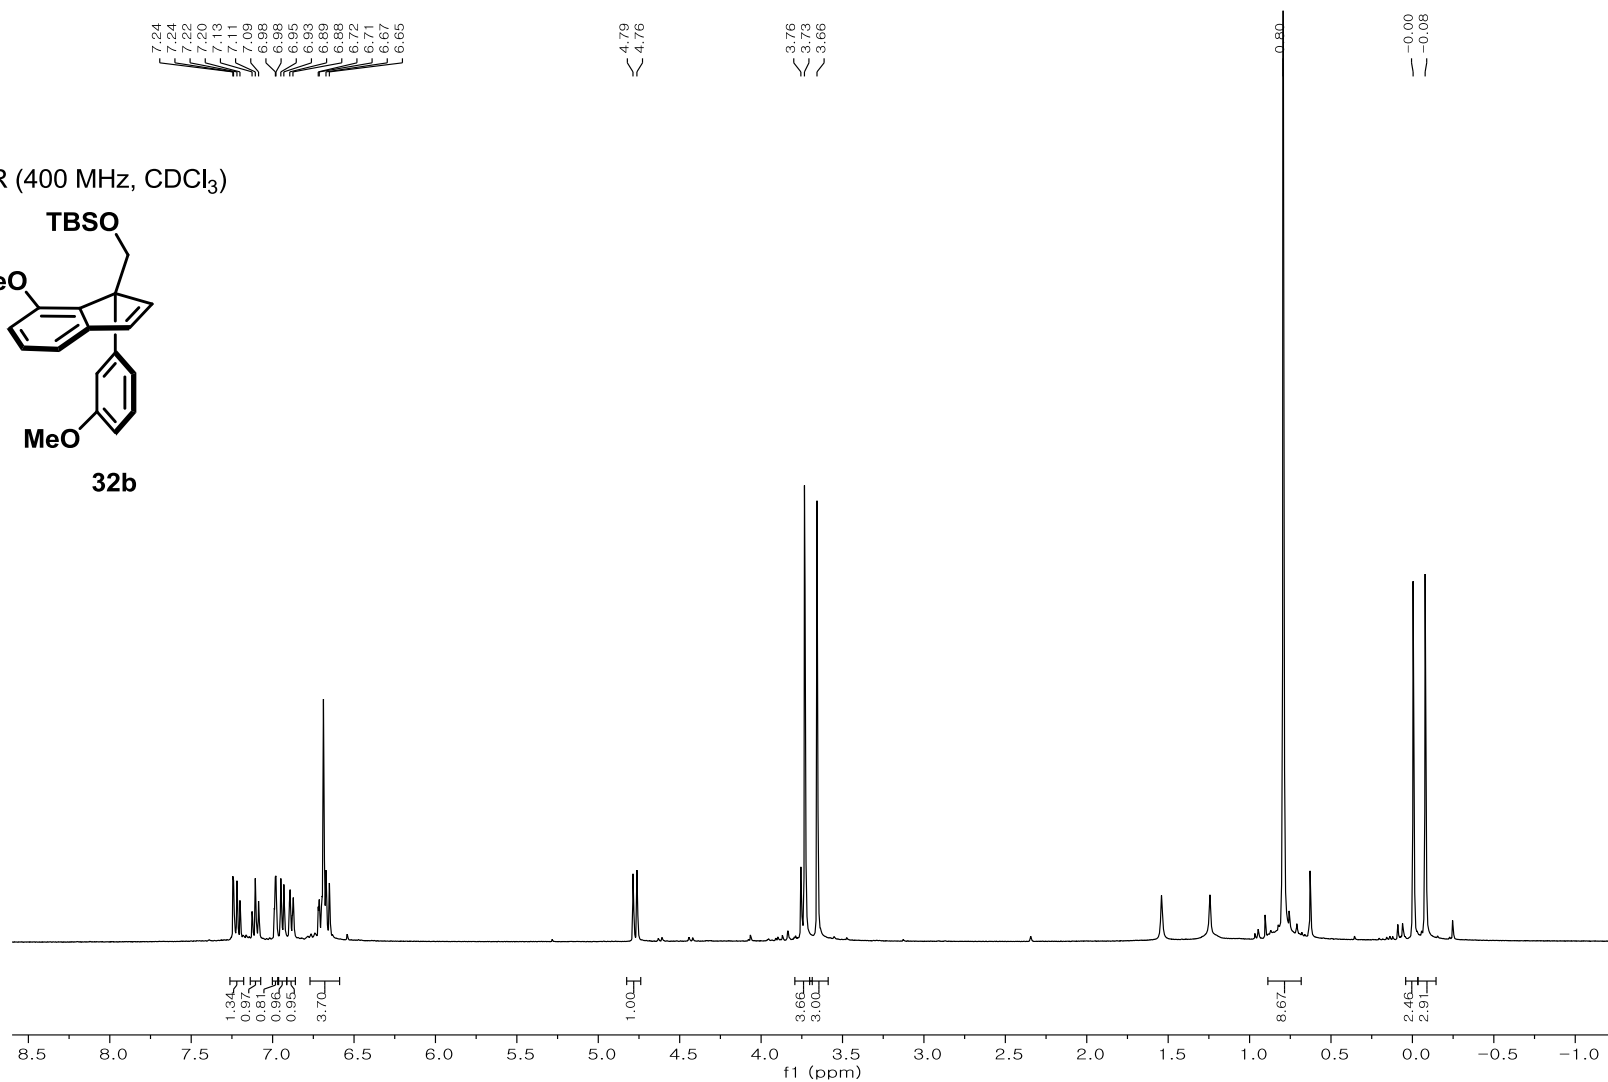

<sup>13</sup>C NMR (101 MHz, CDCl<sub>3</sub>)

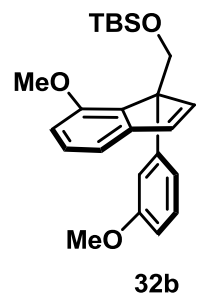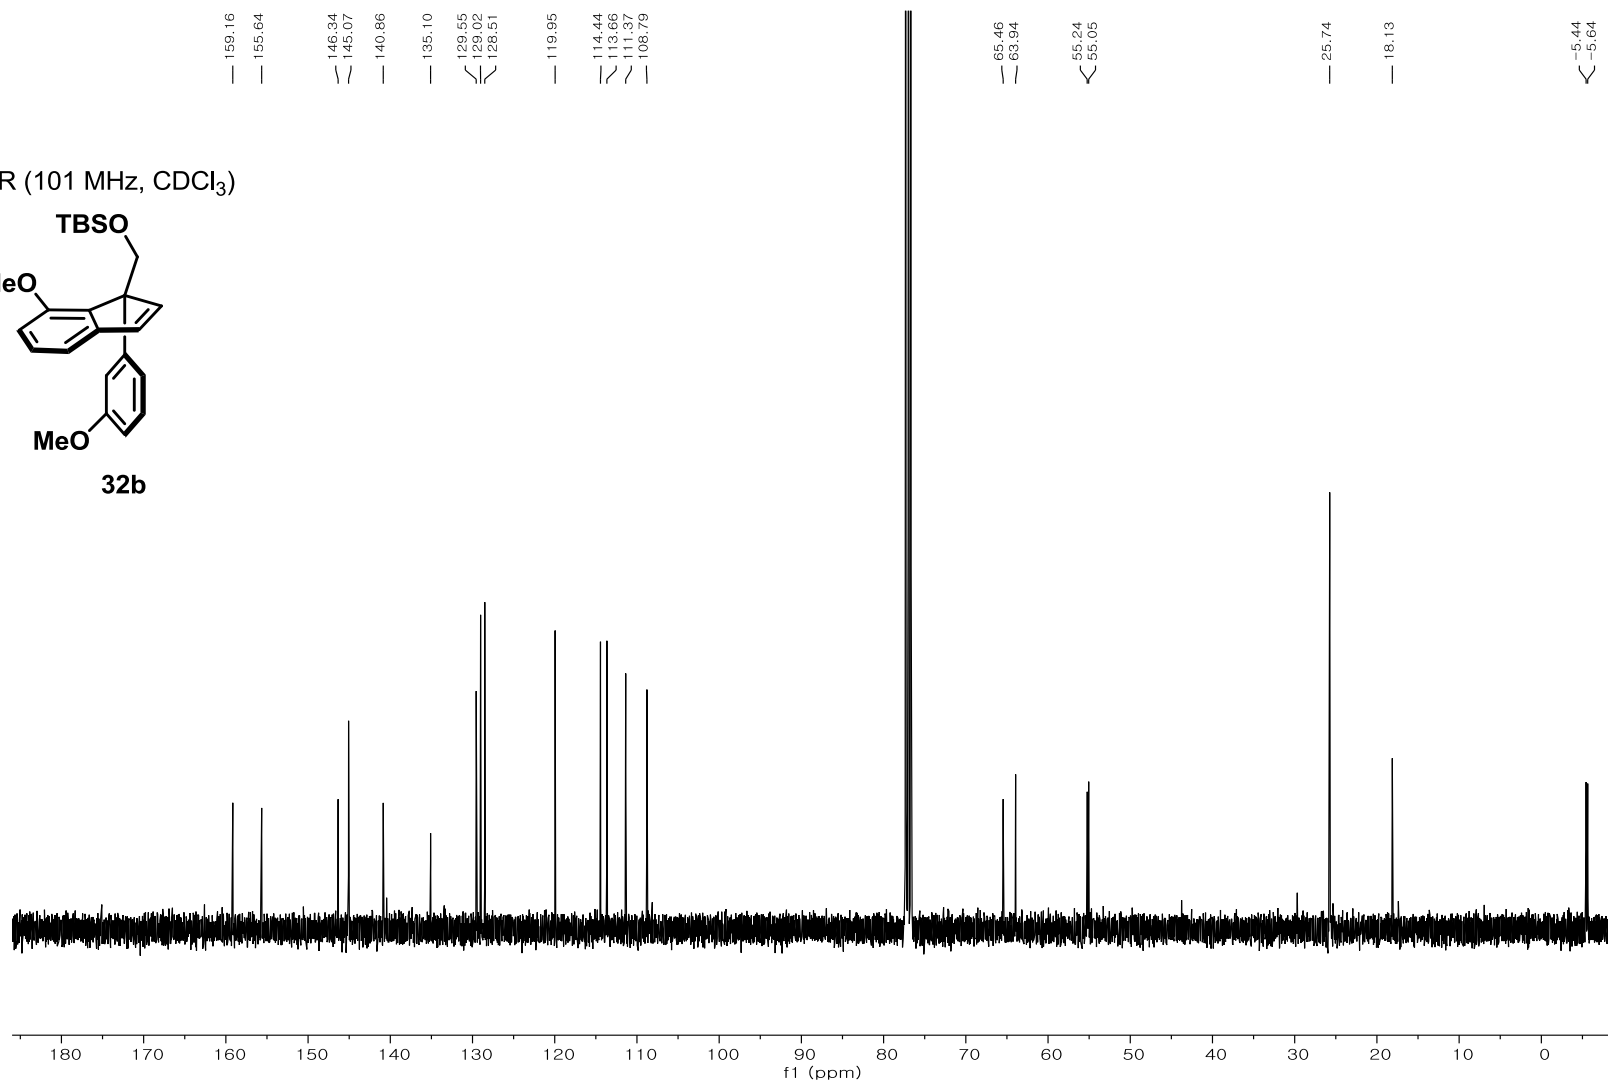

Supplement: d0sc02299c1.pdf [file d0sc02299c1.pdf]
